# Supplementary material for: Accessing novel fluorinated heterocycles with the hypervalent fluoroiodane reagent by solution and mechanochemical synthesis
Source: Royal Society of Chemistry journal article supplement (doi:10.1039/d1cc02587b), 2021-01-01

## Electronic Supplementary Information

### Accessing novel fluorinated heterocycles with the hypervalent fluoroiodane reagent by solution and mechanochemical synthesis

William Riley,<sup>a</sup> Andrew C. Jones,<sup>b</sup> Kuldip Singh,<sup>a</sup> Duncan L. Browne,<sup>\*c</sup>  
and Alison M. Stuart<sup>\*a</sup>

<sup>a</sup> School of Chemistry, University of Leicester, Leicester, LE1 7RH, UK. [Alison.Stuart@le.ac.uk](mailto:Alison.Stuart@le.ac.uk)

<sup>b</sup> Cardiff Catalysis Institute, School of Chemistry, Cardiff University, Cardiff, CF10 3AT.

<sup>c</sup> School of Pharmacy, UCL, London, WC1X 1AX, UK. [Duncan.Browne@ucl.ac.uk](mailto:Duncan.Browne@ucl.ac.uk)

|                                                                                                |                                                                                                             |     |
|------------------------------------------------------------------------------------------------|-------------------------------------------------------------------------------------------------------------|-----|
| <b>Figure S1</b>                                                                               | Molecular structure of tetrahydropyridazine <b>3a</b>                                                       | S2  |
| <b>Figure S2</b>                                                                               | Molecular structure of tetrahydropyridazine <b>3c</b>                                                       | S2  |
| <b>Figure S3</b>                                                                               | Molecular structure of tetrahydropyridazine <b>3h</b>                                                       | S3  |
| <b>Figure S4</b>                                                                               | Molecular structure of tetrahydropyridazine <b>3j</b>                                                       | S3  |
| <b>Figure S5</b>                                                                               | Molecular structure of dihydrooxazine <b>7c</b>                                                             | S4  |
| <b>Figure S6</b>                                                                               | Molecular structure of dihydrooxazine <b>7d</b>                                                             | S4  |
| <b>Table S1</b>                                                                                | Selected bond lengths (Å) and bond angles (°) for <b>3a</b> , <b>3c</b> , <b>3h</b> and <b>3j</b>           | S5  |
| <b>Table S2</b>                                                                                | Selected bond lengths (Å) and bond angles (°) for <b>7c</b> and <b>7d</b>                                   | S5  |
| Experimental Procedures and Characterisation Data                                              |                                                                                                             | S6  |
| Procedure for preparation of unsaturated hydrazones <b>2a-l</b>                                |                                                                                                             | S7  |
| General procedures for intramolecular fluorocyclisations of unsaturated hydrazones <b>2a-l</b> |                                                                                                             | S20 |
| <b>Scheme S1</b>                                                                               | Substoichiometric HFIP studies                                                                              | S28 |
| <b>Table S3</b>                                                                                | Mechanochemical optimisation for fluorocyclisation of unsaturated hydrazone <b>2c</b>                       | S29 |
| Procedure for preparation of unsaturated oximes <b>6a-f</b>                                    |                                                                                                             | S30 |
| <b>Table S4</b>                                                                                | Optimisation of intramolecular fluorocyclisations of unsaturated oxime <b>6a</b>                            | S33 |
| General procedures for intramolecular fluorocyclisations of unsaturated oximes <b>6a-g</b>     |                                                                                                             | S33 |
| <b>Table S5</b>                                                                                | Intramolecular fluorocyclisations of <b>6c</b> with 1 and 2 equiv. of AgBF <sub>4</sub> in solution         | S36 |
| <b>Table S6</b>                                                                                | Mechanochemical optimisation of fluorocyclisations of carboxylic acid <b>12a</b>                            | S39 |
| General procedure for mechanochemical fluorocyclisations of carboxylic acids <b>12a-f</b>      |                                                                                                             | S39 |
| <b>Scheme S2</b>                                                                               | Intramolecular fluorolactonisations and switching of cyclisation selectivity                                | S42 |
| Structure solution and refinement                                                              |                                                                                                             | S43 |
| References                                                                                     |                                                                                                             | S44 |
| <b>Table S7</b>                                                                                | Crystallographic data for fluorinated tetrahydropyridazines <b>3a</b> , <b>3c</b> , <b>3h</b> and <b>3j</b> | S46 |
| <b>Table S8</b>                                                                                | Crystallographic data for fluorinated dihydrooxazines <b>7c</b> and <b>7d</b>                               | S48 |
| NMR Spectra                                                                                    |                                                                                                             | S49 |

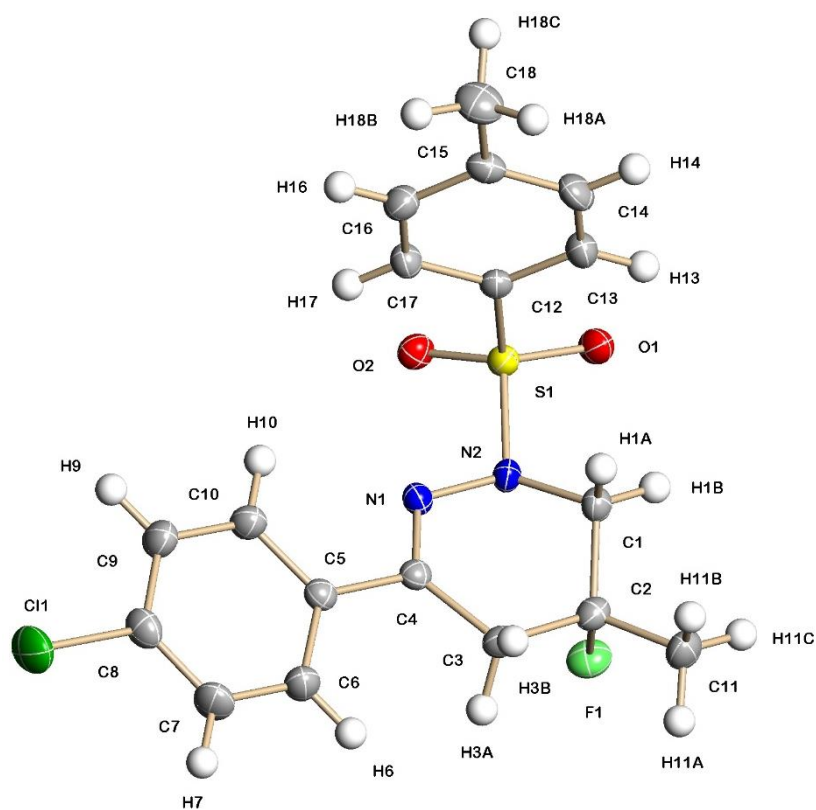

**Figure S1** Molecular structure of 3-(4-chlorophenyl)-5-fluoro-5-methyl-1-tosyl-1,4,5,6-tetrahydropyridazine **3a** showing 50% displacement ellipsoids.

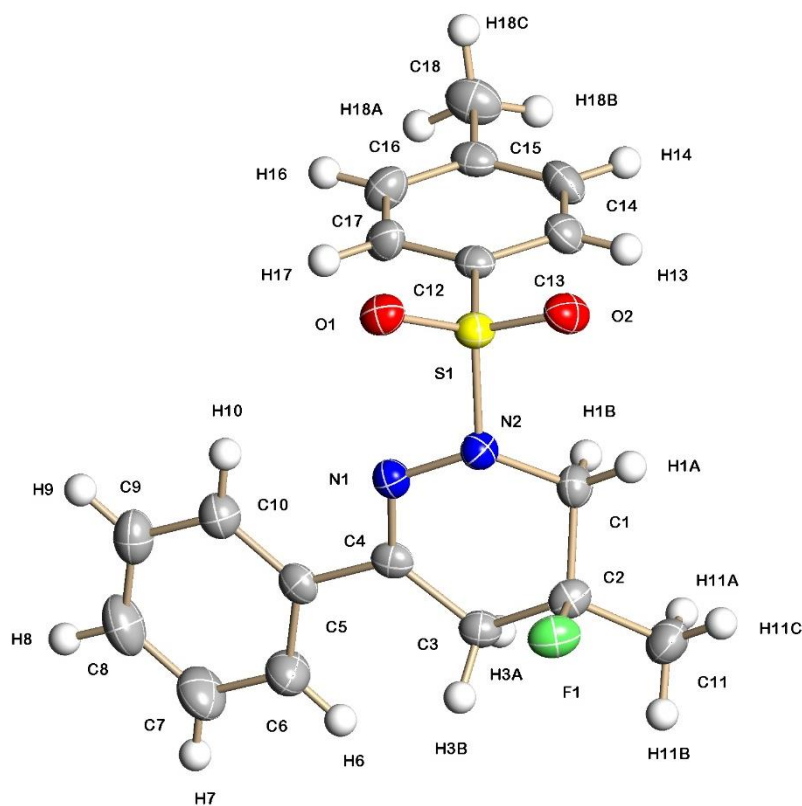

**Figure S2** Molecular structure of 5-fluoro-5-methyl-3-phenyl-1-tosyl-1,4,5,6-tetrahydropyridazine **3c** showing 50% displacement ellipsoids.

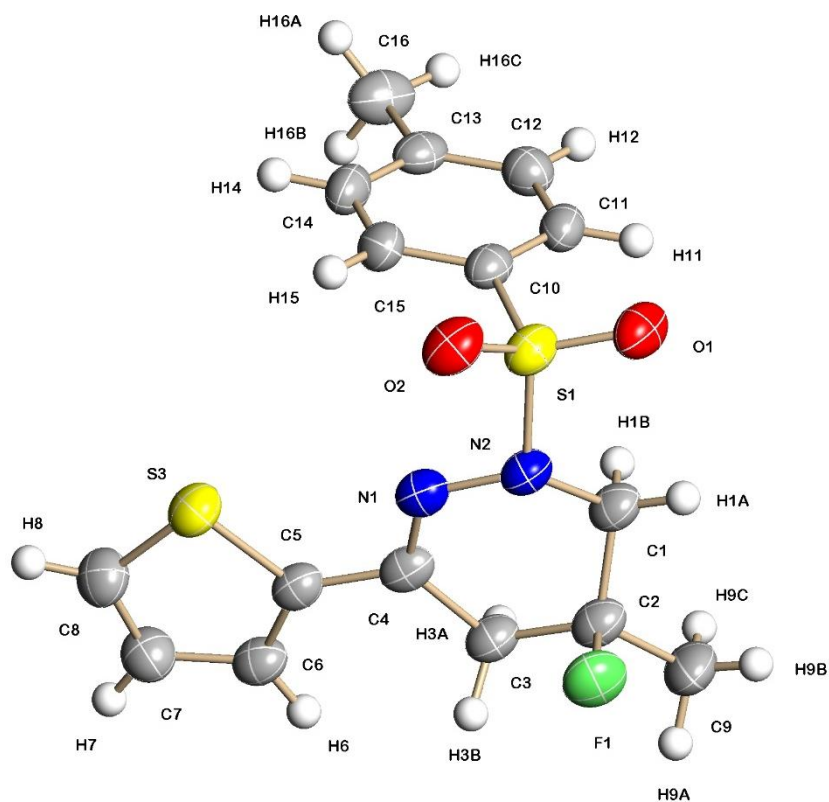

**Figure S3** Molecular structure of 5-fluoro-5-methyl-3-(thiophen-2-yl)-1-tosyl-1,4,5,6-tetrahydropyridazine **3h** showing 50% displacement ellipsoids.

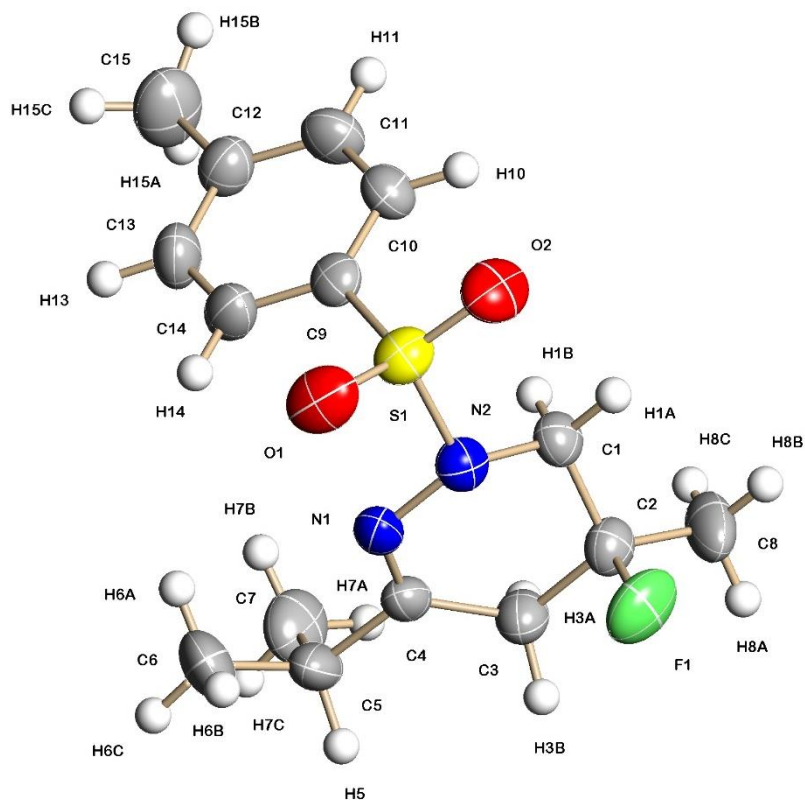

**Figure S4** Molecular structure of 5-fluoro-3-isopropyl-5-methyl-1-tosyl-1,4,5,6-tetrahydropyridazine **3j** showing 50% displacement ellipsoids.

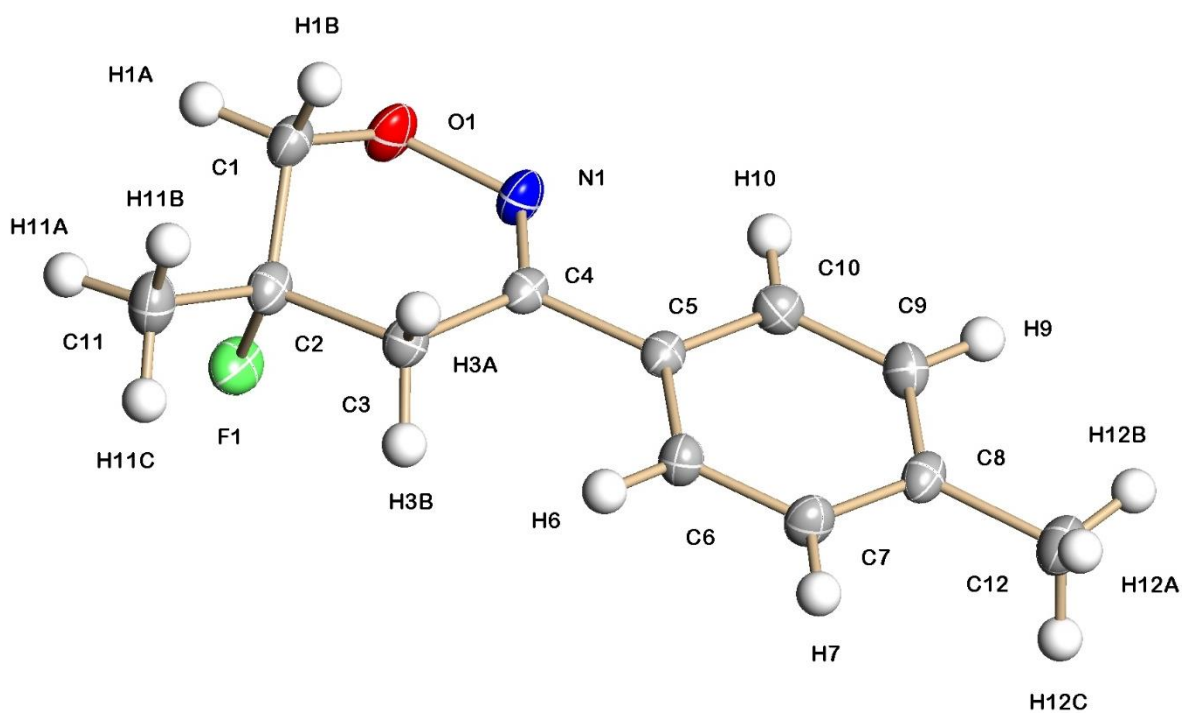

**Figure S5** Molecular structure of 5-fluoro-5-methyl-3-(*p*-tolyl)-5,6-dihydro-4*H*-1,2-oxazine **7c** showing 50% displacement ellipsoids.

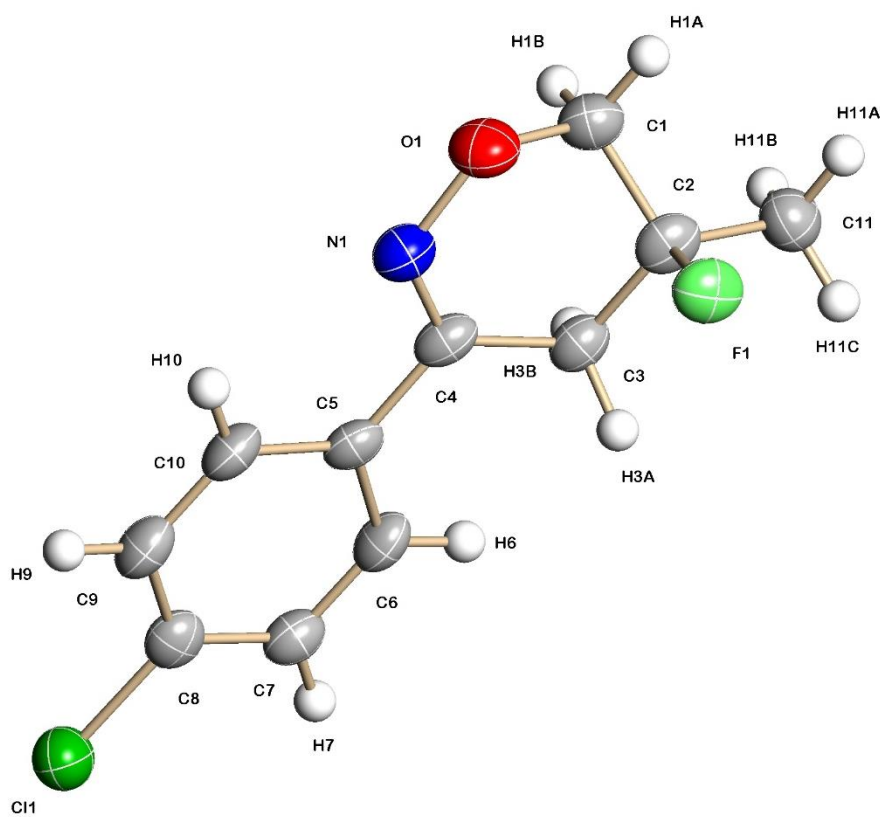

**Figure S6** Molecular structure of 3-(4-chlorophenyl)-5-fluoro-5-methyl-5,6-dihydro-4*H*-1,2-oxazine **7d** showing 50% displacement ellipsoids.

**Table S1** Selected bond lengths (Å) and bond angles (°) with estimated standard deviations (e.s.d.s.) in parenthesis for fluorinated tetrahydropyridazines **3a**, **3c**, **3h** and **3j**

| Bond lengths (Å)<br>and bond angles (°) | <b>3a</b><br>R = 4-C <sub>6</sub> H <sub>4</sub> Cl | <b>3c</b><br>R = Ph | <b>3h</b><br>R = 2-thienyl | <b>3j</b><br>R = CH(CH <sub>3</sub> ) <sub>2</sub> |
|-----------------------------------------|-----------------------------------------------------|---------------------|----------------------------|----------------------------------------------------|
| C(2)-F(1)                               | 1.420(2)                                            | 1.418(3)            | 1.417(3)                   | 1.417(3)                                           |
| C(4)-N(1)                               | 1.281(2)                                            | 1.286(3)            | 1.293(3)                   | 1.273(3)                                           |
| N(1)-N(2)                               | 1.405(2)                                            | 1.408(3)            | 1.397(43)                  | 1.400(3)                                           |
| N(2)-C(1)                               | 1.472(2)                                            | 1.475(3)            | 1.464(3)                   | 1.465(3)                                           |
| C(1)-C(2)-C(3)                          | 110.58(15)                                          | 110.2(2)            | 110.4(2)                   | 109.4(2)                                           |
| F(1)-C(2)-C(11/9/8)                     | 107.86(16)                                          | 107.66(19)          | 107.3(3)                   | 108.4(2)                                           |
| C(4)-N(1)-N(2)                          | 117.61(15)                                          | 118.2(2)            | 118.7(2)                   | 118.0(2)                                           |
| N(1)-N(2)-C(1)                          | 116.80(15)                                          | 117.33(18)          | 118.4(2)                   | 116.52(19)                                         |

**Table S2** Selected bond lengths (Å) and bond angles (°) with estimated standard deviations (e.s.d.s.) in parenthesis for fluorinated dihydrooxazines **7c** and **7d**

| Bond lengths (Å)<br>and bond angles (°) | <b>7c</b><br>R = 4-C <sub>6</sub> H <sub>4</sub> CH <sub>3</sub> | <b>7d</b><br>R = 4-C <sub>6</sub> H <sub>4</sub> Cl |
|-----------------------------------------|------------------------------------------------------------------|-----------------------------------------------------|
| C(2)-F(1)                               | 1.422(2)                                                         | 1.435(5)                                            |
| C(4)-N(1)                               | 1.283(2)                                                         | 1.287(6)                                            |
| N(1)-O(1)                               | 1.425(2)                                                         | 1.400(5)                                            |
| O(1)-C(1)                               | 1.422(2)                                                         | 1.435(6)                                            |
| C(1)-C(2)-C(3)                          | 108.19(15)                                                       | 109.0(4)                                            |
| F(1)-C(2)-C(11)                         | 107.46(16)                                                       | 106.6(4)                                            |
| C(4)-N(1)-O(1)                          | 118.27(16)                                                       | 119.2(4)                                            |
| N(1)-O(1)-C(1)                          | 116.51(13)                                                       | 117.2(4)                                            |

## Experimental

Proton,  $^{19}\text{F}$  and  $^{13}\text{C}$  NMR spectra were recorded on either a Bruker AV400 or a DRX 400 spectrometer at 400.13, 376.46 and 100.62 MHz respectively, or  $^1\text{H}$  and  $^{13}\text{C}$  NMR spectra were recorded on an AV500 spectrometer at 500.13 and 125.76 MHz. The  $^1\text{H}$  and  $^{13}\text{C}$  NMR spectra were referenced to external  $\text{SiMe}_4$  using the high frequency positive convention. Atmospheric Solids Analysis Probe (ASAP) mass spectra were recorded on a Xevo QToF mass spectrometer (Waters) and Electrospray (ESI) mass spectra were obtained by LC-MS using a Xevo QToF mass spectrometer (Waters) coupled to an Acquity LC system (Waters) with an Acquity UPLC BEH C18 column (2.1 x 50 mm). X-ray crystallography data were collected on a Bruker Apex SMART 2000 diffractometer using graphite-monochromated Mo-K $\alpha$  radiation ( $\lambda = 0.71073 \text{ \AA}$ ).

Dichloromethane and tetrahydrofuran were obtained dry from a Puresolve<sup>TM</sup> solvent purification system and were stored in sealed ampoules over 4 $\text{\AA}$  molecular sieves under an atmosphere of dry nitrogen. Hexafluoroisopropanol (HFIP) was purchased from Fluorochem and stored in sealed ampoules over 4 $\text{\AA}$  molecular sieves under an atmosphere of dry nitrogen. The hypervalent fluoroiodane reagent **1**,<sup>4c</sup> and the unsaturated carboxylic acids **12a-f**,<sup>6a</sup> were prepared following the literature procedures.

The ball mill used was a Retsch MM 400 mixer mill. Milling balls were purchased from Bearingboys. Unless otherwise stated, mechanochemical reactions were performed in 10 mL Retsch stainless steel jars with one stainless steel ball of mass 2.5 g. It is worth noting that “under an air atmosphere” means that no precaution was taken to exclude air and moisture, much like running reactions that are not considered to be air or moisture sensitive.

## Procedure for preparation of unsaturated hydrazones 2

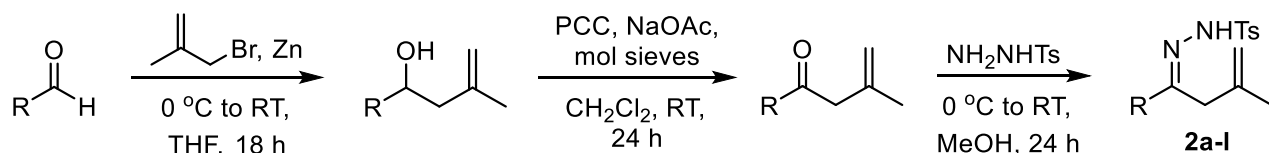

## General Procedure for the activation of zinc<sup>12</sup>

Activated zinc was prepared by stirring powdered zinc (10 g, 153 mmol) in deionised water (100 mL) that was acidified using concentrated 38 % HCl (2 mL). The suspension was stirred for 20 minutes during which time the activated zinc would undergo sedimentation. The acidified aqueous layer was decanted after the period of stirring and the zinc was washed with water (2 x 50 mL) followed by decanting. The zinc was then washed with organic solvents; reagent grade acetone (2 x 40 mL) and diethyl ether (2 x 30 mL). After decanting the final wash solvent the zinc was stirred slowly whilst under reduced pressure for up to 2 hours with flame drying before use. Activated zinc (9.7 g, 97 % recovery) was typically obtained and could be stored under an inert atmosphere, however to ensure reproducibility of the Barbier-type reaction the zinc was prepared fresh for each use.

## General Procedure for the synthesis of unsaturated alcohols<sup>12</sup>

The flask was charged with activated zinc dust (15 mmol), whilst the equilibrating dropping funnel was charged with aldehyde (10 mmol), 3-bromo-2-methylpropene (15 mmol) and dry THF (10 mL) under an inert atmosphere. The solution was added dropwise over half an hour to the suspension of zinc dust whilst maintaining the temperature at 0 °C with external cooling for 2 hours. The reaction was warmed to room temperature and stirred overnight. After quenching with ammonium chloride solution (40 mL), the reaction mixture was stirred for a further 5 minutes. The reaction mixture was diluted with diethyl ether (50 mL) and was filtered, and the reaction flask was washed with diethyl ether (3 x 50 mL). The organic layers were combined, and washed with water (2 x 40 mL) and brine (3 x 40 mL). The organic layer was dried over MgSO<sub>4</sub> and concentrated *in vacuo* to obtain the unsaturated alcohol.

## 1-(4-Chlorophenyl)-3-methylbut-3-en-1-ol

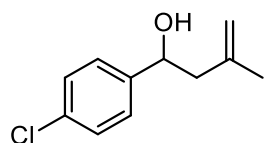

The general procedure was followed using 4-chlorobenzaldehyde (3.0 g, 21.3 mmol), activated zinc dust (2.1 g, 32.0 mmol), 3-bromo-2-methylpropene (3.3 mL, 32.0 mmol) and dry THF (20 mL). The pure product was obtained as a colourless oil (3.84 g, 92 %) and the characterisation was in agreement with the literature.<sup>13</sup>  $\delta_{\text{H}}$  (CDCl<sub>3</sub>, 500 MHz) 1.79 (3H, s, CH<sub>3</sub>), 2.20 (1H, br s, OH), 2.32 - 2.45 (2H, m, CH<sub>2</sub>), 4.78 (1H, dd,

$^3J_{\text{HH}} = 7.5 \text{ Hz}$ ,  $^3J_{\text{HH}} = 5.8 \text{ Hz}$ ,  $\text{CHOH}$ ), 4.84 (1H, s, =CH<sub>2</sub>), 4.93 (1H, s, =CH<sub>2</sub>), 7.31 (4H, s, ArH).  $\delta_{\text{C}}$  (CDCl<sub>3</sub>, 126 MHz) 22.3 (CH<sub>3</sub>), 48.4 (CH<sub>2</sub>), 70.7 (CH), 114.4 (CH<sub>2</sub>), 127.2 (CH), 128.5 (CH), 133.1 (C), 142.0 (C), 142.5 (C).  $m/z$  (ASAP) 179.0637 (M-OH<sup>+</sup>, C<sub>11</sub>H<sub>12</sub><sup>35</sup>Cl requires 179.0628, 100 %), 181.0600 (M-OH<sup>+</sup>, C<sub>11</sub>H<sub>12</sub><sup>37</sup>Cl requires 181.0598, 33 %).

### 3-Methyl-1-(4-(trifluoromethyl)phenyl)but-3-en-1-ol

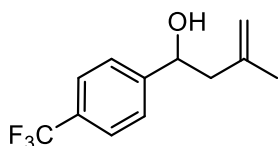

The general procedure was followed using activated zinc dust (0.85 g, 22.0 mmol), 3-bromo-2-methylpropene (1.3 mL, 12.9 mmol) and 4-trifluoromethylbenzaldehyde (1.50 g, 8.6 mmol) in dry THF (20 mL). The pure product was obtained as a colourless oil (1.90 g, 96 %) and the characterisation data was in agreement with the literature.<sup>14</sup>  $\delta_{\text{H}}$  (CDCl<sub>3</sub>, 400 MHz) 1.80 (3H, s, CH<sub>3</sub>), 2.31 - 2.46 (3H, m, CH<sub>2</sub> and OH), 4.78 - 4.90 (2H,  $\text{CHOH}$  and =CH<sub>2</sub>), 4.95 (1H, s, =CH<sub>2</sub>), 7.48 (2H, d,  $^3J_{\text{HH}} = 8.3 \text{ Hz}$ , ArH), 7.60 (2H, d,  $^3J_{\text{HH}} = 8.3 \text{ Hz}$ , ArH).  $\delta_{\text{C}}$  (CDCl<sub>3</sub>, 126 MHz) 22.3 (CH<sub>3</sub>), 48.5 (CH<sub>2</sub>), 70.8 (CH), 114.7 (CH<sub>2</sub>), 124.3 (q,  $^1J_{\text{CF}} = 272.8 \text{ Hz}$ , C) 125.4 (q,  $^3J_{\text{CF}} = 4.2 \text{ Hz}$ , CH), 126.1 (CH), 129.7 (q,  $^2J_{\text{CF}} = 31.8 \text{ Hz}$ , C), 141.8 (C), 148.1 (C).  $\delta_{\text{F}}$  (CDCl<sub>3</sub>, 376 MHz) -62.4 (s).  $m/z$  (ESI) 213.0888 (M-OH<sup>+</sup>, C<sub>12</sub>H<sub>12</sub>F<sub>3</sub> requires 213.0891, 100 %).

### 3-Methyl-1-phenylbut-3-en-1-ol

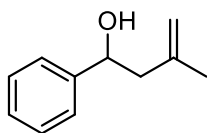

The general procedure was followed using benzaldehyde (4.8 mL, 47.1 mmol), activated zinc dust (6.2 g, 94.2 mmol), 3-bromo-2-methylpropene (9.5 mL, 94.2 mmol) and dry THF (40 mL). The reaction yielded the product as a colourless oil (6.38 g, 84 %) and the characterisation data was in agreement with the literature.<sup>15</sup>  $\delta_{\text{H}}$  (CDCl<sub>3</sub>, 400 MHz) 1.79 (3H, s, CH<sub>3</sub>), 2.15 (1H, d,  $^3J_{\text{HH}} = 2.5 \text{ Hz}$ , OH), 2.40 - 2.45 (2H, d,  $^3J_{\text{HH}} = 6.7 \text{ Hz}$ , CH<sub>2</sub>), 4.80 (1H, td,  $^3J_{\text{HH}} = 6.7 \text{ Hz}$ ,  $^3J_{\text{HH}} = 2.5 \text{ Hz}$ ,  $\text{CHOH}$ ), 4.85 (1H, s, =CH<sub>2</sub>), 4.92 (1H, s, =CH<sub>2</sub>), 7.24 - 7.29 (1H, m, ArH), 7.30 - 7.40 (4H, m, ArH).  $\delta_{\text{C}}$  (CDCl<sub>3</sub>, 126 MHz) 22.4 (CH<sub>3</sub>), 48.4 (CH<sub>2</sub>), 71.4 (CH), 114.1 (CH<sub>2</sub>), 125.8 (CH), 127.5 (CH), 128.4 (CH), 142.4 (C), 144.1 (C).  $m/z$  (ASAP) 145.1015 ((M-OH)<sup>+</sup>, C<sub>11</sub>H<sub>13</sub>, requires 145.1017, 100 %).

### 3-Methyl-1-(*p*-tolyl)but-3-en-1-ol

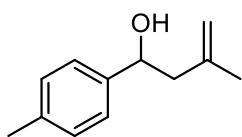

The general procedure was followed using 4-methylbenzaldehyde (3.0 g, 25.0 mmol), activated zinc dust (2.5 g, 37.5 mmol), 3-bromo-2-methylpropene (3.8 mL, 37.5 mmol) and dry THF (25 mL). The pure product was obtained as a colourless oil (3.52 g, 80 %) and the characterisation was in agreement with the literature.<sup>16</sup>  $\delta_{\text{H}}$  (CDCl<sub>3</sub>, 400 MHz) 1.79 (3H, s, CH<sub>3</sub>), 2.06 (1H, br s, OH), 2.34 (3H, s, ArCH<sub>3</sub>), 2.40 - 2.44 (2H, m, CH<sub>2</sub>), 4.76 - 4.80 (1H, m,  $\text{CHOH}$ ), 4.85 (1H, s, =CH<sub>2</sub>), 4.91 (1H, s, =CH<sub>2</sub>), 7.16 (2H, d,  $^3J_{\text{HH}} = 7.8$



Hz, ArH), 7.27 (2H, d,  $^3J_{\text{HH}} = 7.8$  Hz, ArH).  $\delta_{\text{C}}$  (CDCl<sub>3</sub>, 126 MHz) 21.1 (CH<sub>3</sub>), 22.4 (CH<sub>3</sub>), 48.3 (CH<sub>2</sub>), 71.3 (CH), 114.0 (CH<sub>2</sub>), 125.7 (CH), 129.1 (CH), 137.1 (C), 141.1 (C), 142.5 (C). m/z (ASAP) 159.1172 (M-OH<sup>+</sup>, C<sub>12</sub>H<sub>15</sub> requires 159.1174, 100 %).

### 1-(4-Methoxyphenyl)-3-methylbut-3-en-1-ol

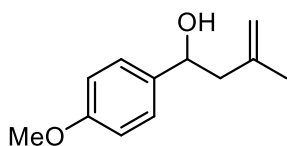

The general procedure was followed using 4-methoxybenzaldehyde (2.5 g, 18.4 mmol), activated zinc dust (1.8 g, 37.5 mmol), 3-bromo-2-methylpropene (2.8 mL, 27.5 mmol) and dry THF (20 mL). The pure product was obtained as a colourless oil (3.00 g, 85 %) and the characterisation was in agreement with the literature.<sup>17</sup>  $\delta_{\text{H}}$  (CDCl<sub>3</sub>, 400 MHz) 1.79 (3H, s, CH<sub>3</sub>), 2.08 (1H, d,  $^3J_{\text{HH}} = 2.3$  Hz, OH), 2.28 - 2.51 (2H, m, CH<sub>2</sub>), 3.81 (3H, s, OCH<sub>3</sub>), 4.77 (1H, m, CHOH), 4.85 (1H, s, =CH<sub>2</sub>), 4.92 (1H, s, =CH<sub>2</sub>), 6.89 (2H, d,  $^3J_{\text{HH}} = 8.8$  Hz, ArH), 7.31 (2H, d,  $^3J_{\text{HH}} = 8.8$  Hz, ArH).  $\delta_{\text{C}}$  (CDCl<sub>3</sub>, 126 MHz) 22.4 (CH<sub>3</sub>), 48.3 (CH<sub>2</sub>), 55.3 (CH<sub>3</sub>), 71.1 (CH), 113.8 (CH), 114.0 (CH<sub>2</sub>), 127.0 (CH), 136.2 (C), 142.5 (C), 159.0 (C). m/z (ASAP) 175.1123 (M-OH<sup>+</sup>, C<sub>12</sub>H<sub>15</sub>O requires 175.1123, 60 %).

### 1-(3-Methoxyphenyl)-3-methylbut-3-en-1-ol

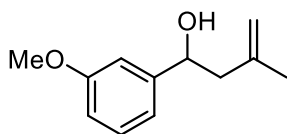

The general procedure was followed using activated zinc dust (1.44 g, 22.0 mmol), 3-bromo-2-methylpropene (2.2 mL, 22.0 mmol) and 3-methoxybenzaldehyde (2.00 g, 14.7 mmol) in dry THF (20 mL). The pure product was obtained as a colourless oil (2.76 g, 98 %) and the characterisation data was in agreement with the literature.<sup>18</sup>  $\delta_{\text{H}}$  (CDCl<sub>3</sub>, 400 MHz) 1.80 (3H, s, CH<sub>3</sub>), 2.12 (1H, br s, OH), 2.42 (2H, d,  $^3J_{\text{HH}} = 6.7$  Hz, CH<sub>2</sub>), 3.82 (3H, s, OCH<sub>3</sub>), 4.79 (1H, t,  $^3J_{\text{HH}} = 6.7$  Hz, CHOH), 4.86 (1H, s, =CH<sub>2</sub>), 4.93 (1H, s, =CH<sub>2</sub>), 6.81 (1H, ddd,  $^3J_{\text{HH}} = 8.2$  Hz,  $^4J_{\text{HH}} = 2.4$  Hz,  $^4J_{\text{HH}} = 1.1$  Hz, ArH), 6.92 - 6.97 (2H, m, ArH), 7.23 - 7.29 (1H, m, ArH).  $\delta_{\text{C}}$  (CDCl<sub>3</sub>, 126 MHz) 22.3 (CH<sub>3</sub>), 48.4 (CH<sub>2</sub>), 55.2 (CH<sub>3</sub>), 71.3 (CH), 111.2 (CH), 113.0 (CH), 114.1 (CH<sub>2</sub>), 118.1 (CH), 129.4 (CH), 142.4 (C), 145.8 (C), 159.8 (C). m/z (ESI) 175.1124 (M-OH<sup>+</sup>, C<sub>12</sub>H<sub>15</sub>O requires 175.1123, 100 %).

### 1-(2-Methoxyphenyl)-3-methylbut-3-en-1-ol

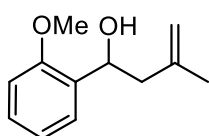

The general procedure was followed using activated zinc dust (1.10 g, 16.5 mmol), 3-bromo-2-methylpropene (1.7 mL, 16.5 mmol) and 2-methoxybenzaldehyde (1.50 g, 11.0 mmol) in dry THF (20 mL). The pure product was obtained as a white solid (2.00 g, 95 %) and the characterisation data was in agreement with the literature.<sup>19</sup> Mp 35-37 °C (lit,<sup>20</sup> 35-36 °C).  $\delta_{\text{H}}$  (CDCl<sub>3</sub>, 400 MHz) 1.81 (3H, s, CH<sub>3</sub>), 2.39 (1H, ddd,  $^2J_{\text{HH}} = 14.0$  Hz,  $^3J_{\text{HH}} = 9.0$  Hz,  $^4J_{\text{HH}} = 0.8$  Hz, CH<sub>A</sub>H<sub>B</sub>), 2.48 (1H, d,  $^3J_{\text{HH}} = 4.7$  Hz, OH), 2.51 (1H, br dd,  $^2J_{\text{HH}} = 14.0$  Hz,  $^3J_{\text{HH}} = 4.5$  Hz, CH<sub>A</sub>H<sub>B</sub>), 3.85 (3H, s, OCH<sub>3</sub>), 4.82 (1H, s, =CH<sub>2</sub>), 4.87 (1H, s, =CH<sub>2</sub>), 5.08 (1H, td,

$^3J_{\text{HH}} = 7.8 \text{ Hz}$ ,  $^3J_{\text{HH}} = 4.7 \text{ Hz}$ ,  $\text{CHOH}$ ), 6.87 (1H, dd,  $^3J_{\text{HH}} = 8.0 \text{ Hz}$ ,  $^4J_{\text{HH}} = 1.0 \text{ Hz}$ , ArH), 6.96 (1H, td,  $^3J_{\text{HH}} = 7.5 \text{ Hz}$ ,  $^4J_{\text{HH}} = 1.0 \text{ Hz}$ , ArH), 7.24 (1H, td,  $^3J_{\text{HH}} = 8.0 \text{ Hz}$ ,  $^4J_{\text{HH}} = 1.7 \text{ Hz}$ , ArH), 7.39 (1H, dd,  $^3J_{\text{HH}} = 7.5 \text{ Hz}$ ,  $^4J_{\text{HH}} = 1.7 \text{ Hz}$ , ArH).  $\delta_{\text{C}}$  ( $\text{CDCl}_3$ , 126 MHz) 22.4 ( $\text{CH}_3$ ), 46.3 ( $\text{CH}_2$ ), 55.3 ( $\text{CH}_3$ ), 67.7 ( $\text{CH}$ ), 110.4 ( $\text{CH}$ ), 113.3 ( $\text{CH}_2$ ), 120.7 ( $\text{CH}$ ), 126.5 ( $\text{CH}$ ), 128.2 ( $\text{CH}$ ), 132.2 (C), 143.1 (C), 156.3 (C).  $m/z$  (ASAP) 175.1122 ( $\text{M-OH}^+$ ,  $\text{C}_{12}\text{H}_{15}\text{O}$  requires 175.1123, 100 %).

### 3-Methyl-1-(thiophen-2-yl)but-3-en-1-ol

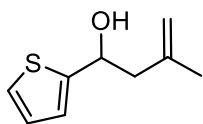

The general procedure was followed using activated zinc dust (1.75 g, 26.8 mmol), 3-bromo-2-methylpropene (2.6 mL, 26.8 mmol) and 4-thiophene-2-carboxaldehyde (2.00 g, 17.8 mmol) in dry THF (20 mL). The pure product was obtained as a colourless oil (2.65 g, 88 %) and the characterisation data was in agreement with the literature.<sup>21</sup>  $\delta_{\text{H}}$  ( $\text{CDCl}_3$ , 400 MHz) 1.82 (3H, s,  $\text{CH}_3$ ), 2.27 (1H, d,  $^3J_{\text{HH}} = 3.1 \text{ Hz}$ , OH), 2.58 (2H, d,  $^3J_{\text{HH}} = 6.7 \text{ Hz}$ ,  $\text{CH}_2$ ), 4.90 (1H, s,  $=\text{CH}_2$ ), 4.96 (1H, s,  $=\text{CH}_2$ ), 5.11 (1H, td,  $^3J_{\text{HH}} = 6.5 \text{ Hz}$ ,  $^3J_{\text{HH}} = 3.0 \text{ Hz}$ ,  $\text{CHOH}$ ), 6.99 (1H, dd,  $^3J_{\text{HH}} = 4.9 \text{ Hz}$ ,  $^3J_{\text{HH}} = 3.5 \text{ Hz}$ , ArH), 7.01 - 7.03 (1H, m, ArH), 7.28 (1H, dd,  $^3J_{\text{HH}} = 5.0 \text{ Hz}$ ,  $^4J_{\text{HH}} = 1.0 \text{ Hz}$ , ArH).  $\delta_{\text{C}}$  ( $\text{CDCl}_3$ , 126 MHz) 22.3 ( $\text{CH}_3$ ), 48.2 ( $\text{CH}_2$ ), 67.6 ( $\text{CH}$ ), 114.4 ( $\text{CH}_2$ ), 123.6 ( $\text{CH}$ ), 124.5 ( $\text{CH}$ ), 126.6 ( $\text{CH}$ ), 141.8 (C), 147.9 (C).  $m/z$  (ESI) 151.0586 ( $\text{M-OH}^+$ ,  $\text{C}_9\text{H}_{11}\text{S}$  requires 151.0581, 100 %).

### 2-Methylhept-1-en-4-ol

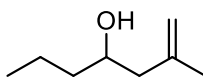

The general procedure was followed using butanal (3.0 g, 41.6 mmol), activated zinc dust (4.1 g, 62.4 mmol), 3-bromo-2-methylpropene (6.3 mL, 62.4 mmol) and dry THF (40 mL). The pure product was obtained as a colourless oil (4.55 g, 85 %) and the characterisation data was in agreement with the literature.<sup>22</sup>  $\delta_{\text{H}}$  ( $\text{CDCl}_3$ , 400 MHz) 0.94 (3H, t,  $^3J_{\text{HH}} = 7.1 \text{ Hz}$ ,  $\text{CH}_3$ ), 1.32 - 1.56 (4H, m,  $\text{CH}_2$ ), 1.76 (3H, s,  $\text{CH}_3$ ), 1.82 - 1.89 (1H, m, OH), 2.09 (1H, dd,  $^2J_{\text{HH}} = 13.7 \text{ Hz}$ ,  $^3J_{\text{HH}} = 9.4 \text{ Hz}$ ,  $\text{CH}_A\text{H}_B$ ), 2.20 (1H, dd,  $^2J_{\text{HH}} = 13.7 \text{ Hz}$ ,  $^3J_{\text{HH}} = 3.6 \text{ Hz}$ ,  $\text{CH}_A\text{H}_B$ ), 3.72 - 3.77 (1H, m,  $\text{CHOH}$ ), 4.80 (1H, s,  $=\text{CH}_2$ ), 4.88 (1H, s,  $=\text{CH}_2$ ).  $\delta_{\text{C}}$  ( $\text{CDCl}_3$ , 126 MHz) 14.1 ( $\text{CH}_3$ ), 18.9 ( $\text{CH}_2$ ), 22.4 ( $\text{CH}_3$ ), 39.3 ( $\text{CH}_2$ ), 46.2 ( $\text{CH}_2$ ), 68.4 ( $\text{CH}$ ), 113.4 ( $\text{CH}_2$ ), 142.9 (C).  $m/z$  (ESI, ASAP, ACPI, GC) No ionisation achieved.

### 2,5-Dimethylhex-5-en-3-ol

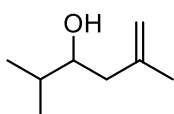

The general procedure was followed using activated zinc dust (4.10 g, 62.4 mmol), 3-bromo-2-methylpropene (6.29 mL, 62.4 mmol) and isobutyraldehyde (3.00 g, 41.6 mmol) in dry THF (40 mL). The pure product was obtained as a colourless oil (3.50 g, 66 %) and the characterisation data was in agreement with the literature.<sup>23</sup> bp  $\sim 65 \text{ }^\circ\text{C}$  at 1 atm.  $\delta_{\text{H}}$  ( $\text{CDCl}_3$ , 400 MHz) 0.87 (3H, d,  $^3J_{\text{HH}} = 6.6 \text{ Hz}$ ,  $\text{CH}_3$ ), 0.88 (3H, d,  $^3J_{\text{HH}} = 6.6 \text{ Hz}$ ,  $\text{CH}_3$ ), 1.57 (1H, d,

$^3J_{\text{HH}} = 2.9$  Hz, OH), 1.63 (1H, septet of doublets,  $^3J_{\text{HH}} = 6.6$  Hz,  $^3J_{\text{HH}} = 5.5$  Hz,  $\text{CH}(\text{CH}_3)_2$ ), 1.70 (3H, s,  $\text{CH}_3$ ), 1.99 (1H, dd,  $^2J_{\text{HH}} = 13.7$  Hz,  $^3J_{\text{HH}} = 10.7$  Hz,  $\text{CH}_A\text{H}_B$ ), 2.16 (1H, dd,  $^2J_{\text{HH}} = 13.7$  Hz,  $^3J_{\text{HH}} = 2.9$  Hz,  $\text{CH}_A\text{H}_B$ ), 3.42 (1H, ddt,  $^3J_{\text{HH}} = 10.2$  Hz,  $^3J_{\text{HH}} = 5.5$  Hz,  $^3J_{\text{HH}} = 2.9$  Hz, CH), 4.74 (1H, s,  $=\text{CH}_2$ ), 4.82 (1H, s,  $=\text{CH}_2$ ).  $\delta_{\text{C}}$  ( $\text{CDCl}_3$ , 101 MHz) 17.6 ( $\text{CH}_3$ ), 18.6 ( $\text{CH}_3$ ), 22.3 ( $\text{CH}_3$ ), 33.4 (CH), 42.9 ( $\text{CH}_2$ ), 73.1 (CH), 113.5 ( $\text{CH}_2$ ), 145.8 (C). m/z (ESI/GCMS/ASAP) No ionisation achieved.

### 5-Methyl-2-phenylhex-5-en-3-ol

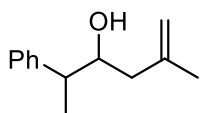

The general procedure was followed using activated zinc dust (1.1 g, 16.8 mmol), 3-bromo-2-methylpropene (1.7 mL, 16.8 mmol) and 2-phenylpropionaldehyde (1.5 g, 11.2 mmol) in dry THF (20 mL). The pure product was obtained as a mixture of diastereomers (anti:syn = 3:1) as a colourless oil (2.04 g, 96 %) and the characterisation data was in agreement with the literature.<sup>24</sup>  $\delta_{\text{H}}$  ( $\text{CDCl}_3$ , 400 MHz) 1.32 (3H, d,  $^3J_{\text{HH}} = 7.2$  Hz,  $\text{CH}_{3\text{syn}}$ ) 1.37 (3H, d,  $^3J_{\text{HH}} = 7.1$  Hz,  $\text{CH}_{3\text{anti}}$ ), 1.59 (1H, br s,  $\text{OH}_{\text{syn}}$ ), 1.69 (3H, s,  $\text{CH}_{3\text{anti}}$ ), 1.76 (4H, br s,  $\text{CH}_{3\text{syn}}$  and  $\text{OH}_{\text{anti}}$ ), 1.94 - 2.32 (2H, m,  $\text{CH}_A\text{H}_{B\text{mix}}$ ), 2.70 - 2.86 (1H, m,  $\text{CH}(\text{CH}_3)_{\text{mix}}$ ), 3.75 - 3.91 (1H, m,  $\text{CH}(\text{OH})_{\text{mix}}$ ), 4.77 (1H, s,  $=\text{CH}_2$ ), 4.86 (1H, s,  $=\text{CH}_2$ ), 7.14 - 7.40 (5H, m, ArH).  $\delta_{\text{C}}$  ( $\text{CDCl}_3$ , 101 MHz) 16.6 ( $\text{CH}_{3\text{anti}}$ ), 17.7 ( $\text{CH}_{3\text{syn}}$ ), 22.2 ( $\text{CH}_{3\text{anti}}$ ), 22.4 ( $\text{CH}_{3\text{syn}}$ ), 43.3 ( $\text{CH}_{2\text{syn}}$ ), 44.0 ( $\text{CH}_{2\text{anti}}$ ), 45.7 ( $\text{CH}_{\text{syn}}$ ), 45.8 ( $\text{CH}_{\text{anti}}$ ), 72.9 ( $\text{CH}_{\text{anti}}$ ), 73.0 ( $\text{CH}_{\text{syn}}$ ), 113.4 ( $\text{CH}_{2\text{syn}}$ ), 113.5 ( $\text{CH}_{2\text{anti}}$ ), 126.4 ( $\text{CH}_{\text{anti}}$ ), 126.6 ( $\text{CH}_{\text{syn}}$ ), 127.8 ( $\text{CH}_{\text{anti}}$ ), 128.2 ( $\text{CH}_{\text{syn}}$ ), 128.4 ( $\text{CH}_{\text{syn}}$ ), 128.5 ( $\text{CH}_{\text{anti}}$ ), 142.98 ( $\text{C}_{\text{syn}}$ ), 143.03 ( $\text{C}_{\text{anti}}$ ), 143.4 ( $\text{C}_{\text{syn}}$ ), 144.6 ( $\text{C}_{\text{anti}}$ ). m/z (ESI) 173.1326 ( $(\text{M}-\text{OH})^+$ ),  $\text{C}_{13}\text{H}_{17}$  requires 173.1330, 100 %).

### 1,1'-(1,3-Phenylene)bis(3-methylbut-3-en-1-ol)

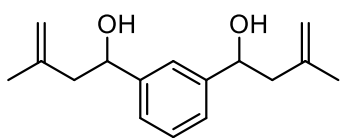

The general procedure was followed but using twice the typical equivalents of activated zinc and 3-bromo-2-methylpropene (3 equiv): activated zinc dust (2.2 g, 33.5 mmol), 3-bromo-2-methylpropene (3.4 mL, 33.5 mmol) and isophthalaldehyde (1.5 g, 11.2 mmol) in dry THF (40 mL). The pure product was obtained as a colourless oil (2.71 g, 98 %) and the characterisation data was in agreement with the literature.<sup>25</sup>  $\delta_{\text{H}}$  ( $\text{CDCl}_3$ , 500 MHz) 1.81 (6H, s,  $\text{CH}_3$ ), 2.17 (2H, d,  $^3J_{\text{HH}} = 1.8$  Hz, OH), 2.43 (4H, d,  $^3J_{\text{HH}} = 6.9$  Hz,  $\text{CH}_2$ ), 4.82 (2H, td,  $^3J_{\text{HH}} = 6.8$  Hz,  $^3J_{\text{HH}} = 1.9$  Hz,  $\text{CH}(\text{OH})$ ), 4.87 (2H, s,  $=\text{CH}_2$ ), 4.94 (2H, s,  $=\text{CH}_2$ ), 7.27 - 7.31 (2H, m, ArH), 7.31 - 7.36 (1H, m, ArH), 7.38 - 7.45 (1H, m, ArH).  $\delta_{\text{C}}$  ( $\text{CDCl}_3$ , 101 MHz) 22.3 ( $\text{CH}_3$ ), 48.5 ( $\text{CH}_2$ ), 71.4 (CH), 114.2 ( $\text{CH}_2$ ), 123.1 (CH), 124.9 (CH), 128.5 (CH), 142.4 (C), 144.3 (C). m/z (ESI/ASAP/GC) No ionisation obtained.

### General Procedure for synthesis of unsaturated ketones<sup>26</sup>

A dry 3 necked round bottom flask was charged with anhydrous sodium acetate (5.0 mmol), 4 Å molecular sieves (5.00 g), unsaturated alcohol (10 mmol) and dry DCM (60 mL). PCC (15 mmol) was then added portion wise. The reaction was stirred at room temperature for 24 hours under an inert atmosphere. The reaction mixture was diluted with diethyl ether (50 mL) and was filtered through a silica plug. The reaction flask was washed with diethyl ether (3 x 50 mL) which was also passed through the silica plug. The organic layers were combined and concentrated *in vacuo* to obtain the corresponding unsaturated ketone.

#### 1-(4-Chlorophenyl)-3-methylbut-3-en-1-one

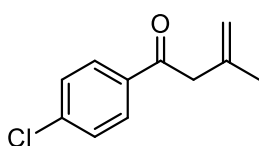

The general procedure was followed using anhydrous sodium acetate (0.63 g, 7.6 mmol), 4 Å molecular sieves (5.00 g), 1-(4-chlorophenyl)-3-methylbut-3-en-1-ol (3.00 g, 15.3 mmol) and PCC (5.00 g, 22.8 mmol) in dry DCM (60 mL). The pure product was obtained as a yellow oil (2.42 g, 81 %).  $\delta_{\text{H}}$  (CDCl<sub>3</sub>,

400 MHz) 1.81 (3H, s, CH<sub>3</sub>), 3.65 (2H, s, CH<sub>2</sub>), 4.85 (1H, s, =CH<sub>2</sub>), 4.99 (1H, s, =CH<sub>2</sub>), 7.43 (2H, d, <sup>3</sup>J<sub>HH</sub> = 8.2 Hz, ArH), 7.92 (2H, d, <sup>3</sup>J<sub>HH</sub> = 8.2 Hz, ArH).  $\delta_{\text{C}}$  (CDCl<sub>3</sub>, 126 MHz) 22.8 (CH<sub>3</sub>), 47.8 (CH<sub>2</sub>), 115.2 (CH<sub>2</sub>), 128.9 (CH), 129.8 (CH), 135.1 (C), 139.5 (C), 139.6 (C), 196.9 (CO). *m/z* (ASAP) 195.0576 (MH<sup>+</sup>, C<sub>11</sub>H<sub>12</sub>O<sup>35</sup>Cl requires 195.0576, 100 %), 197.0560 (MH<sup>+</sup>, C<sub>11</sub>H<sub>12</sub>O<sup>37</sup>Cl requires 195.0547, 33 %).

#### 3-Methyl-1-(4-(trifluoromethyl)phenyl)but-3-en-1-one

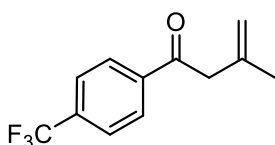

The general procedure was followed using anhydrous sodium acetate (0.45 g, 5.5 mmol), molecular sieves (4.00 g), 1-(4-trifluoromethylphenyl)-3-methylbut-3-en-1-ol (2.00 g, 10.9 mmol) and PCC (3.53 g, 16.4 mmol) in dry

DCM (60 mL). The pure product was obtained as a white solid (1.45 g, 81 %). The characterisation data was in agreement with the literature.<sup>27</sup> Mp 36-38 °C.  $\delta_{\text{H}}$  (CDCl<sub>3</sub>, 400 MHz) 1.83 (3H, s, CH<sub>3</sub>), 3.71 (2H, s, CH<sub>2</sub>), 4.87 (1H, s, =CH<sub>2</sub>), 5.01 (1H, s, =CH<sub>2</sub>), 7.73 (2H, d, <sup>3</sup>J<sub>HH</sub> = 8.2 Hz, ArH), 8.08 (2H, d, <sup>3</sup>J<sub>HH</sub> = 8.2 Hz, ArH).  $\delta_{\text{C}}$  (CDCl<sub>3</sub>, 126 MHz) 22.8 (CH<sub>3</sub>), 48.0 (CH<sub>2</sub>), 115.5 (CH<sub>2</sub>), 123.6 (q, <sup>1</sup>J<sub>CF</sub> = 273.4 Hz, C), 125.7 (q, <sup>3</sup>J<sub>CF</sub> = 3.6 Hz, CH), 128.8 (CH), 134.4 (q, <sup>2</sup>J<sub>CF</sub> = 32.7 Hz, C), 139.2 (C), 139.4 (C), 197.1 (CO).  $\delta_{\text{F}}$  (CDCl<sub>3</sub>, 376 MHz) -63.1 (s). *m/z* (ESI) 229.0845 (MH<sup>+</sup>, C<sub>12</sub>H<sub>12</sub>F<sub>3</sub>O requires 229.0840, 100 %).

### 3-Methyl-1-phenylbut-3-en-1-one

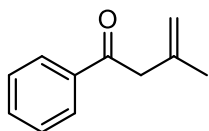

The general procedure was followed using anhydrous sodium acetate (0.51 g, 6.2 mmol), 3-methyl-1-phenylbut-3-en-1-ol (2.04 g, 12.4 mmol), PCC (4.00 g, 18.5 mmol) and dry DCM (60 mL). The reaction yielded the desired product as a yellow oil (1.61 g, 80 %) and the characterisation data was in agreement with the literature.<sup>28</sup>  $\delta_{\text{H}}$  ( $\text{CDCl}_3$ , 400 MHz) 1.82 (3H, s,  $\text{CH}_3$ ), 3.69 (2H, s,  $\text{CH}_2$ ), 4.85 (1H, s,  $=\text{CH}_2$ ), 4.98 (1H, s,  $=\text{CH}_2$ ), 7.45 (2H, t,  $^3J_{\text{HH}} = 7.6$  Hz, ArH), 7.55 (1H, t,  $^3J_{\text{HH}} = 7.4$  Hz, ArH), 7.98 (2H, d,  $^3J_{\text{HH}} = 7.7$  Hz, ArH).  $\delta_{\text{C}}$  ( $\text{CDCl}_3$ , 126 MHz) 22.8 ( $\text{CH}_3$ ), 47.7 ( $\text{CH}_2$ ), 115.0 ( $\text{CH}_2$ ), 128.4 (CH), 128.6 (CH), 133.11 (CH), 136.8 (C), 139.76 (C), 198.1 (CO).  $m/z$  (ASAP) 161.0960 ( $\text{MH}^+$ ,  $\text{C}_{11}\text{H}_{13}\text{O}$  requires 161.0966, 5 %).

### 3-Methyl-1-(*p*-tolyl)but-3-en-1-one

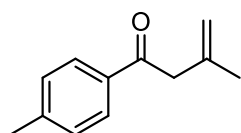

The general procedure was followed using anhydrous sodium acetate (0.70 g, 8.50 mmol), 4 Å molecular sieves (6.00 g), 3-methyl-1-(*p*-tolyl)but-3-en-1-ol (3.00 g, 17.0 mmol) and PCC (5.50 g, 25.5 mmol) in dry DCM (60 mL). The pure product was obtained as a colourless crystal/ white solid (2.00 g, 68 %). Mp 55-56 °C.  $\delta_{\text{H}}$  ( $\text{CDCl}_3$ , 400 MHz) 1.81 (3H, s,  $\text{CH}_3$ ), 2.40 (3H, s, Ar $\text{CH}_3$ ), 3.65 (2H, s,  $\text{CH}_2$ ), 4.84 (1H, s,  $=\text{CH}_2$ ), 4.97 (1H, s,  $=\text{CH}_2$ ), 7.25 (2H, d,  $^3J_{\text{HH}} = 8.0$  Hz, ArH), 7.88 (2H, d,  $^3J_{\text{HH}} = 8.0$  Hz, ArH).  $\delta_{\text{C}}$  ( $\text{CDCl}_3$ , 126 MHz) 21.6 ( $\text{CH}_3$ ), 22.8 ( $\text{CH}_3$ ), 47.7 ( $\text{CH}_2$ ), 114.8 ( $\text{CH}_2$ ), 128.6 (CH), 129.2 (CH), 134.4 (C), 140.0 (C), 143.9 (C), 197.8 (CO).  $m/z$  (ASAP) 175.1126 ( $\text{MH}^+$ ,  $\text{C}_{12}\text{H}_{15}\text{O}$  requires 175.1123, 100 %).

### 1-(4-Methoxyphenyl)-3-methylbut-3-en-1-one

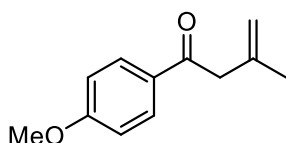

The general procedure was followed using anhydrous sodium acetate (0.70 g, 8.59 mmol), 4 Å molecular sieves (6.00 g), 1-(4-methoxyphenyl)-3-methylbut-3-en-1-ol (3.30 g, 17.2 mmol) and PCC (5.55 g, 25.8 mmol) in dry DCM (60 mL). The pure product was obtained as a colourless oil (2.24 g, 69 %).  $\delta_{\text{H}}$  ( $\text{CDCl}_3$ , 400 MHz) 1.81 (3H, s,  $\text{CH}_3$ ), 3.64 (2H, s,  $\text{CH}_2$ ), 3.87 (3H, s,  $\text{OCH}_3$ ), 4.85 (1H, s,  $=\text{CH}_2$ ), 4.97 (1H, s,  $=\text{CH}_2$ ), 6.93 (2H, d,  $^3J_{\text{HH}} = 9.0$  Hz, ArH), 7.97 (2H, d,  $^3J_{\text{HH}} = 9.0$  Hz, ArH).  $\delta_{\text{C}}$  ( $\text{CDCl}_3$ , 126 MHz) 22.9 ( $\text{CH}_3$ ), 47.6 ( $\text{CH}_2$ ), 55.5 ( $\text{CH}_3$ ), 113.7 (CH), 114.7 ( $\text{CH}_2$ ), 129.9 (C), 130.7 (CH), 140.2 (C), 163.5 (C), 196.7 (CO).  $m/z$  (ASAP) 191.1068 ( $\text{MH}^+$ ,  $\text{C}_{12}\text{H}_{15}\text{O}_2$  requires 191.1072, 10 %).

### 1-(3-Methoxyphenyl)-3-methylbut-3-en-1-one

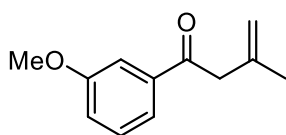

The general procedure was followed using anhydrous sodium acetate (0.45 g, 5.5 mmol), molecular sieves (4.00 g), 1-(3-methoxyphenyl)-3-methylbut-3-en-1-ol (2.00 g, 10.9 mmol) and PCC (3.53 g, 16.4 mmol) in dry DCM (60 mL). The pure product was obtained as a colourless oil (1.63 g, 83 %). The

characterisation data was in agreement with the literature.<sup>29</sup>  $\delta_{\text{H}}$  ( $\text{CDCl}_3$ , 400 MHz) 1.82 (3H, s,  $\text{CH}_3$ ), 3.67 (2H, s,  $\text{CH}_2$ ), 3.85 (3H, s,  $\text{OCH}_3$ ), 4.85 (1H, s,  $=\text{CH}_2$ ), 4.98 (1H, s,  $=\text{CH}_2$ ), 7.11 (1H, ddd,  $^3J_{\text{HH}} = 8.2$  Hz,  $^4J_{\text{HH}} = 2.6$  Hz,  $^4J_{\text{HH}} = 0.9$  Hz, ArH), 7.36 (1H, t,  $^3J_{\text{HH}} = 7.9$  Hz, ArH), 7.51 (1H, dd,  $^4J_{\text{HH}} = 2.5$  Hz,  $^4J_{\text{HH}} = 1.6$  Hz, ArH), 7.56 (1H, dt,  $^3J_{\text{HH}} = 7.6$  Hz,  $^4J_{\text{HH}} = 1.3$  Hz, ArH).  $\delta_{\text{C}}$  ( $\text{CDCl}_3$ , 126 MHz) 22.8 ( $\text{CH}_3$ ), 47.9 ( $\text{CH}_2$ ), 55.4 ( $\text{CH}_3$ ), 112.6 (CH), 114.9 ( $\text{CH}_2$ ), 119.6 (CH), 121.1 (CH), 129.5 (CH), 138.2 (C), 139.8 (C), 159.8 (C), 197.9 (CO).  $m/z$  (ESI) 191.1076 ( $\text{MH}^+$ ,  $\text{C}_{12}\text{H}_{15}\text{O}_2$  requires 191.1072, 100 %).

### 1-(2-Methoxyphenyl)-3-methylbut-3-en-1-one

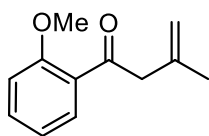

The general procedure was followed using anhydrous sodium acetate (0.45 g, 5.5 mmol), molecular sieves (4.00 g), 1-(2-methoxyphenyl)-3-methylbut-3-en-1-ol (2.00 g, 10.9 mmol) and PCC (3.53 g, 16.4 mmol) in dry DCM (60 mL). The pure product was obtained as a colourless oil (1.50 g, 75 %). The characterisation data was in agreement with the literature.<sup>30</sup>  $\delta_{\text{H}}$  ( $\text{CDCl}_3$ , 400 MHz) 1.79 (3H, s,  $\text{CH}_3$ ), 3.71 (2H, s,  $\text{CH}_2$ ), 3.90 (3H, s,  $\text{OCH}_3$ ), 4.78 (1H, s,  $=\text{CH}_2$ ), 4.91 (1H, s,  $=\text{CH}_2$ ), 6.96 (1H, d,  $^3J_{\text{HH}} = 8.2$  Hz, ArH), 6.99 (1H, td,  $^3J_{\text{HH}} = 7.5$  Hz,  $^4J_{\text{HH}} = 1.0$  Hz, ArH), 7.45 (1H, td,  $^3J_{\text{HH}} = 7.4$  Hz,  $^4J_{\text{HH}} = 1.9$  Hz, ArH), 7.67 (1H, dd,  $^3J_{\text{HH}} = 7.8$  Hz,  $^4J_{\text{HH}} = 1.8$  Hz, ArH).  $\delta_{\text{C}}$  ( $\text{CDCl}_3$ , 126 MHz) 22.9 ( $\text{CH}_3$ ), 52.3 ( $\text{CH}_2$ ), 55.5 ( $\text{CH}_3$ ), 111.5 (CH), 114.3 ( $\text{CH}_2$ ), 120.7 (CH), 128.4 (C), 130.4 (CH), 133.4 (CH), 140.1 (C), 158.4 (C), 200.5 (CO).  $m/z$  (ESI) 191.1068 ( $\text{MH}^+$ ,  $\text{C}_{12}\text{H}_{15}\text{O}_2$  requires 191.1072, 100 %).

### 3-Methyl-1-(thiophen-2-yl)but-3-en-1-one

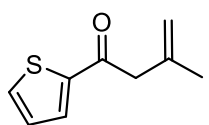

The general procedure was followed using anhydrous sodium acetate (0.66 g, 8.0 mmol), 4 Å molecular sieves (6.00 g), 3-methyl-1-(thiophen-2-yl)but-3-en-1-ol (2.70 g, 16.1 mmol) and PCC (5.20 g, 24.1 mmol) in dry DCM (60 mL). The pure product was obtained as a colourless oil (2.15 g, 81 %).  $\delta_{\text{H}}$  ( $\text{CDCl}_3$ , 400 MHz) 1.83 (3H, s,  $\text{CH}_3$ ), 3.62 (2H, s,  $\text{CH}_2$ ), 4.91 (1H, s,  $=\text{CH}_2$ ), 4.99 (1H, s,  $=\text{CH}_2$ ), 7.13 (1H, dd,  $^3J_{\text{HH}} = 5.0$  Hz,  $^3J_{\text{HH}} = 3.8$  Hz, ArH), 7.64 (1H, dd,  $^3J_{\text{HH}} = 4.9$  Hz,  $^4J_{\text{HH}} = 1.2$  Hz, ArH), 7.77 (1H, dd,  $^3J_{\text{HH}} = 3.8$  Hz,  $^4J_{\text{HH}} = 1.1$  Hz, ArH).  $\delta_{\text{C}}$  ( $\text{CDCl}_3$ , 126 MHz) 22.7 ( $\text{CH}_3$ ), 48.7 ( $\text{CH}_2$ ), 115.1 ( $\text{CH}_2$ ), 128.1 (CH), 132.4 (CH), 133.8 (CH), 139.5 (C), 144.1 (C), 190.8 (CO).  $m/z$  (ESI) 167.0533 ( $\text{MH}^+$ ,  $\text{C}_9\text{H}_{11}\text{OS}$  requires 167.0531, 100 %).

### 2-Methylhept-1-en-4-one

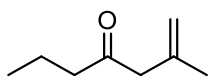

The general procedure was followed using anhydrous sodium acetate (0.4 g, 5.03 mmol), 4 Å molecular sieves (4.00 g), 2-methylhept-1-en-4-ol (1.29 g, 10.1 mmol) and PCC (3.25 g, 15.1 mmol) in dry DCM (30 mL). The pure product was obtained as a colourless

oil (0.87 g, 68 %).  $\delta_{\text{H}}$  ( $\text{CDCl}_3$ , 400 MHz) 0.91 (3H, t,  $^3J_{\text{HH}} = 7.3$  Hz,  $\text{CH}_3$ ), 1.60 (2H, sxt,  $^3J_{\text{HH}} = 7.3$  Hz,  $\text{CH}_2$ ), 1.75 (3H, s,  $\text{CH}_3$ ), 2.43 (2H, t,  $^3J_{\text{HH}} = 7.3$  Hz,  $\text{CH}_2$ ), 3.10 (2H, s,  $\text{CH}_2$ ), 4.81 (1H, s,  $=\text{CH}_2$ ), 4.94 (1H, s,  $=\text{CH}_2$ ).  $\delta_{\text{C}}$  ( $\text{CDCl}_3$ , 126 MHz) 13.7 ( $\text{CH}_3$ ), 17.2 ( $\text{CH}_2$ ), 22.6 ( $\text{CH}_3$ ), 43.8 ( $\text{CH}_2$ ), 52.2 ( $\text{CH}_2$ ), 114.8 ( $\text{CH}_2$ ), 139.3 (C), 208.9 (CO).  $m/z$  (ASAP) 127.1124 ( $\text{MH}^+$ ,  $\text{C}_8\text{H}_{15}\text{O}$  requires 127.1123, 100 %).

### 2,5-Dimethylhex-5-en-3-one

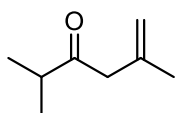

The general procedure was followed using anhydrous sodium acetate (1.12 g, 13.7 mmol), molecular sieves (9.00 g), 2,5-dimethylhex-5-en-3-ol (3.50 g, 27.3 mmol) and PCC (8.83 g, 41.0 mmol) in dry DCM (100 mL). The pure product was obtained as a colourless oil (2.84 g, 83 %). The characterisation data was in agreement with the literature.<sup>31</sup>  $\delta_{\text{H}}$  ( $\text{CDCl}_3$ , 400 MHz) 1.03 (6H, d,  $^3J_{\text{HH}} = 6.9$  Hz,  $\text{CH}_3$ ), 1.68 (3H, s,  $\text{CH}_3$ ), 2.65 (1H, sept,  $^3J_{\text{HH}} = 6.9$  Hz,  $\text{CH}(\text{CH}_3)_2$ ), 3.10 (2H, s,  $\text{CH}_2$ ), 4.72 (1H, s,  $=\text{CH}_2$ ), 4.87 (1H, s,  $=\text{CH}_2$ ).  $\delta_{\text{C}}$  ( $\text{CDCl}_3$ , 101 MHz) 18.3 ( $\text{CH}_3$ ), 22.7 ( $\text{CH}_3$ ), 40.2 ( $\text{CH}_2$ ), 49.8 (CH), 114.8 ( $\text{CH}_2$ ), 139.4 (C), 212.5 (CO).  $m/z$  (ASAP) 127.1120 ( $\text{MH}^+$ ,  $\text{C}_8\text{H}_{15}\text{O}$  requires 127.1123, 100 %).

### 5-Methyl-2-phenylhex-5-en-3-one

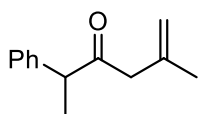

The general procedure was followed using anhydrous sodium acetate (0.43 g, 5.25 mmol), 4 Å molecular sieves (4.50 g), 5-methyl-2-phenylhex-5-en-3-ol (2.00 g, 10.5 mmol) and PCC (3.40 g, 15.8 mmol) in dry DCM (60 mL). The pure product was obtained as a colourless oil (1.85 g, 94 %).  $\delta_{\text{H}}$  ( $\text{CDCl}_3$ , 400 MHz) 1.39 (3H, d,  $^3J_{\text{HH}} = 6.9$  Hz,  $\text{CH}(\text{CH}_3)_2$ ), 1.64 (3H, s,  $\text{CH}_3$ ), 3.00 (1H, d,  $^2J_{\text{HH}} = 15.2$  Hz,  $\text{CH}_\text{A}\text{H}_\text{B}$ ), 3.10 (1H, d,  $^2J_{\text{HH}} = 15.1$  Hz,  $\text{CH}_\text{A}\text{H}_\text{B}$ ), 3.88 (1H, q,  $^3J_{\text{HH}} = 6.9$  Hz,  $\text{CH}(\text{CH}_3)_2$ ), 4.70 (1H, s,  $=\text{CH}_2$ ), 4.89 (1H, s,  $=\text{CH}_2$ ), 7.19 - 7.24 (2H, m, ArH), 7.25 - 7.29 (1H, m, ArH), 7.29 - 7.36 (2H, m, ArH).  $\delta_{\text{C}}$  ( $\text{CDCl}_3$ , 101 MHz) 17.6 ( $\text{CH}_3$ ), 22.5 ( $\text{CH}_3$ ), 50.2 ( $\text{CH}_2$ ), 52.0 (CH), 114.9 ( $\text{CH}_2$ ), 127.2 (CH), 128.0 (CH), 128.9 (CH), 139.3 (C), 140.4 (C), 208.5 (CO).  $m/z$  (ESI) 189.1278 ( $\text{MH}^+$ ,  $\text{C}_{13}\text{H}_{17}\text{O}$  requires 189.1279, 100 %).

### 1,1'-(1,3-Phenylene)bis(3-methylbut-3-en-1-one)

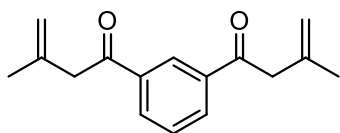

The general procedure was followed but using twice the typical equivalents of anhydrous sodium acetate anhydrous, PCC and 4 Å molecular sieves: anhydrous sodium acetate (0.87 g, 5.35 mmol), 4 Å molecular sieves (8.00 g), 1,1'-(1,3-Phenylene)bis(3-methylbut-3-en-1-ol) (2.62 g, 10.7 mmol) and PCC (6.89 g, 32.0 mmol) in dry DCM (60 mL). The pure product was obtained as a colourless oil (1.93 g, 75 %).  $\delta_{\text{H}}$  ( $\text{CDCl}_3$ , 400 MHz) 1.83 (6H, s,  $\text{CH}_3$ ), 3.73 (4H, s,  $\text{CH}_2$ ), 4.88 (2H, s,  $=\text{CH}_2$ ), 5.01 (2H, s,  $=\text{CH}_2$ ), 7.57 (1H, t,  $^3J_{\text{HH}} = 7.7$  Hz, ArH), 8.17 (2H, dd,  $^3J_{\text{HH}} = 7.8$  Hz,  $^4J_{\text{HH}} = 1.7$  Hz, ArH),

8.58 (1H, t,  $^4J_{\text{HH}} = 1.6$  Hz, ArH).  $\delta_{\text{C}}$  (CDCl<sub>3</sub>, 126 MHz) 22.8 (CH<sub>3</sub>), 47.9 (CH<sub>2</sub>), 115.3 (CH<sub>2</sub>), 128.3 (CH), 129.1 (CH), 132.6 (CH), 137.0 (C), 139.4 (C), 197.3 (CO). m/z (ESI) 243.1378 (MH<sup>+</sup>, C<sub>16</sub>H<sub>19</sub>O<sub>2</sub> requires 243.1385, 100 %).

### General Procedure for preparation of unsaturated tosyl hydrazones **2**<sup>32</sup>

A flask was charged with unsaturated ketone (10 mmol) in absolute methanol (50 mL) and cooled to 0 °C for 30 minutes. After adding tosyl hydrazide (15 mmol) at 0 °C, the reaction mixture was stirred at 0 °C for 30 minutes before warming to room temperature and stirring for 24 hours under an inert atmosphere. The reaction mixture was concentrated *in vacuo* and purified by column chromatography using petroleum ether : ethyl acetate (4 :1). Compounds **2a-1** were prepared using this procedure.

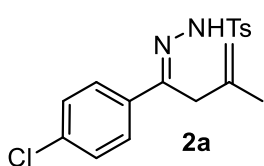

The general procedure was followed using 3-methyl-1-(4-chlorophenyl)-but-3-en-1-one (300 mg, 1.5 mmol) and tosyl hydrazide (431 mg, 10.4 mmol) in absolute methanol (10 mL). (*E*)-*N'*-(1-(4-Chlorophenyl)-3-methylbut-3-en-1-ylidene)-4-methylbenzenesulfonohydrazide **2a** was obtained as a white solid

(473 mg, 85 %). Mp 145-149 °C.  $\delta_{\text{H}}$  (CDCl<sub>3</sub>, 400 MHz) 1.78 (3H, s, CH<sub>3</sub>), 2.41 (3H, s, ArCH<sub>3</sub>), 3.26 (2H, s, CH<sub>2</sub>), 4.30 (1H, s, =CH<sub>2</sub>), 4.76 (1H, s, =CH<sub>2</sub>), 7.29 (2H, d,  $^3J_{\text{HH}} = 8.8$  Hz, ArH), 7.30 (2H, d,  $^3J_{\text{HH}} = 8.4$  Hz, ArH), 7.55 (2H, d,  $^3J_{\text{HH}} = 8.8$  Hz, ArH), 7.65 (1H, s, NH), 7.83 (2H, d,  $^3J_{\text{HH}} = 8.4$  Hz, ArH).  $\delta_{\text{C}}$  (CDCl<sub>3</sub>, 126 MHz) 21.6 (CH<sub>3</sub>), 23.0 (CH<sub>3</sub>), 36.1 (CH<sub>2</sub>), 112.6 (CH<sub>2</sub>), 127.6 (CH), 128.0 (CH), 128.7 (CH), 129.6 (CH), 135.2 (C), 135.3 (C), 135.8 (C), 137.8 (C), 144.3 (C), 152.2 (C). m/z (ESI) 363.0934 (MH<sup>+</sup>, C<sub>18</sub>H<sub>20</sub><sup>35</sup>ClN<sub>2</sub>O<sub>2</sub>S requires 363.0934, 100 %), 365.0909 (MH<sup>+</sup>, C<sub>18</sub>H<sub>20</sub><sup>37</sup>ClN<sub>2</sub>O<sub>2</sub>S requires 365.0905, 45 %).

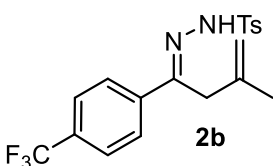

The general procedure was followed using 3-methyl-1-(4-(trifluoromethyl)phenyl)-but-3-en-1-one (1.40 g, 6.1 mmol) and tosyl hydrazide (1.72 g, 9.2 mmol) in absolute methanol (25 mL). (*E*)-4-Methyl-*N'*-(3-methyl-1-(4-(trifluoromethyl)phenyl)but-3-en-1-ylidene) benzene-sulfonohydrazide **2b** was obtained as a white solid (2.38 g, 98 %).

Mp 90-93 °C.  $\delta_{\text{H}}$  (CDCl<sub>3</sub>, 400 MHz) 1.80 (3H, s, CH<sub>3</sub>), 2.41 (3H, s, ArCH<sub>3</sub>), 3.30 (2H, s, CH<sub>2</sub>), 4.28 (1H, s, =CH<sub>2</sub>), 4.77 (1H, s, =CH<sub>2</sub>), 7.30 (2H, d,  $^3J_{\text{HH}} = 8.0$  Hz, ArH), 7.59 (2H, d,  $^3J_{\text{HH}} = 8.0$  Hz, ArH), 7.72 (2H, d,  $^3J_{\text{HH}} = 8.4$  Hz, ArH), 7.79 (1H, s, NH), 7.84 (2H, d,  $^3J_{\text{HH}} = 8.4$  Hz, ArH).  $\delta_{\text{C}}$  (CDCl<sub>3</sub>, 126 MHz) 21.6 (CH<sub>3</sub>), 23.0 (CH<sub>3</sub>), 36.1 (CH<sub>2</sub>), 112.8 (CH<sub>2</sub>), 123.9 (q,  $^1J_{\text{CF}} = 272.5$  Hz, C), 125.4 (q,  $^3J_{\text{CF}} = 3.6$  Hz, CH), 126.6 (CH), 128.0 (CH), 129.6 (CH), 131.3 (q,  $^2J_{\text{CF}} = 32.4$  Hz, C), 135.1 (C), 137.6 (C), 140.2 (C), 144.4 (C), 151.7 (C).  $\delta_{\text{F}}$  (CDCl<sub>3</sub>, 376 MHz) -62.8 (s). m/z (ESI) 397.1199 (MH<sup>+</sup>, C<sub>19</sub>H<sub>20</sub>F<sub>3</sub>N<sub>2</sub>O<sub>2</sub>S requires 397.1198, 100 %).



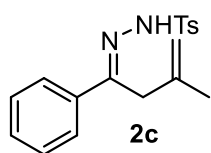

The general procedure was followed using 3-methyl-1-phenylbut-3-en-1-one (2.10 g, 13.1 mmol) and tosyl hydrazide (3.66 g, 19.7 mmol) in absolute methanol (70 mL). (*E*)-4-Methyl-*N'*-(3-methyl-1-phenylbut-3-en-1-ylidene)benzenesulfonylhydrazide **2c** was obtained as a white solid/colourless crystal (3.31 g, 77 %).

The characterisation data was in agreement with the literature.<sup>33</sup> Mp 141-145 °C (lit.<sup>33</sup> 145-146 °C).  $\delta_{\text{H}}$  (CDCl<sub>3</sub>, 400 MHz) 1.78 (3H, s, CH<sub>3</sub>), 2.40 (3H, s, ArCH<sub>3</sub>), 3.30 (2H, s, CH<sub>2</sub>), 4.34 (1H, s, =CH<sub>2</sub>), 4.76 (1H, s, =CH<sub>2</sub>), 7.29 (2H, d, <sup>3</sup>*J*<sub>HH</sub> = 8.4 Hz, ArH), 7.32 - 7.37 (3H, m, ArH), 7.58 - 7.66 (3H, m, ArH and NH) 7.85 (2H, d, <sup>3</sup>*J*<sub>HH</sub> = 8.4 Hz, ArH).  $\delta_{\text{C}}$  (CDCl<sub>3</sub>, 126 MHz) 21.6 (CH<sub>3</sub>), 23.0 (CH<sub>3</sub>), 36.3 (CH<sub>2</sub>), 112.6 (CH<sub>2</sub>), 126.3 (CH), 128.1 (CH), 128.4 (CH), 129.5 (CH), 129.7 (CH), 135.3 (C), 136.9 (C), 138.0 (C), 144.1 (C), 153.5 (C). *m/z* (ASAP) 329.1331 (MH<sup>+</sup>, C<sub>18</sub>H<sub>21</sub>N<sub>2</sub>O<sub>2</sub>S requires 329.1324, 100 %).

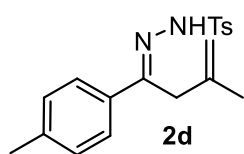

The general procedure was followed using 3-methyl-1-(4-methylphenyl)-but-3-en-1-one (1.76 g, 10.1 mmol) and tosyl hydrazide (2.82 g, 15.2 mmol) in absolute methanol (50 mL). (*E*)-4-Methyl-*N'*-(3-methyl-1-(*p*-tolyl)but-3-en-1-ylidene)benzenesulfonylhydrazide **2d** was obtained as a white solid (2.00 g, 58 %)

after recrystallisation from DCM post chromatography. Mp 127-128 °C.  $\delta_{\text{H}}$  (CDCl<sub>3</sub>, 400 MHz) 1.76 (3H, s, CH<sub>3</sub>), 2.34 (3H, s, ArCH<sub>3</sub>), 2.39 (3H, s, ArCH<sub>3</sub>), 3.27 (2H, s, CH<sub>2</sub>), 4.31 (1H, s, =CH<sub>2</sub>), 4.73 (1H, s, =CH<sub>2</sub>), 7.14 (2H, d, <sup>3</sup>*J*<sub>HH</sub> = 8.0 Hz, ArH), 7.28 (2H, d, <sup>3</sup>*J*<sub>HH</sub> = 8.0 Hz, ArH), 7.52 (2H, d, <sup>3</sup>*J*<sub>HH</sub> = 8.3 Hz, ArH), 7.64 (1H, s, NH), 7.84 (2H, d, <sup>3</sup>*J*<sub>HH</sub> = 8.3 Hz, ArH).  $\delta_{\text{C}}$  (CDCl<sub>3</sub>, 126 MHz) 21.3 (CH<sub>3</sub>), 21.6 (CH<sub>3</sub>), 23.0 (CH<sub>3</sub>), 36.2 (CH<sub>2</sub>), 112.5 (CH<sub>2</sub>), 126.3 (CH), 128.1 (CH), 129.1 (CH), 129.5 (CH), 134.1 (C), 135.3 (C), 138.2 (C), 139.9 (C), 144.0 (C), 153.5 (C). *m/z* (ASAP) 343.1485 (MH<sup>+</sup>, C<sub>19</sub>H<sub>23</sub>N<sub>2</sub>O<sub>2</sub>S requires 343.1480, 100 %).

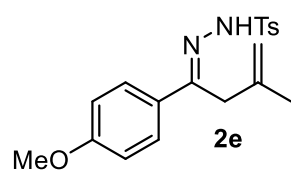

The general procedure was followed using 3-methyl-1-(4-methoxyphenyl)-but-3-en-1-one (2.68 g, 14.1 mmol) and tosyl hydrazide (3.94 g, 21.1 mmol) in absolute methanol (75 mL). (*E*)-*N'*-(1-(4-Methoxyphenyl)-3-methylbut-3-en-1-ylidene)-4-methylbenzenesulfonylhydrazide **2e** was obtained as a

white solid (3.68 g, 86 %). Mp 136-138 °C.  $\delta_{\text{H}}$  (CDCl<sub>3</sub>, 500 MHz) 1.77 (3H, s, CH<sub>3</sub>), 2.40 (3H, s, ArCH<sub>3</sub>), 3.27 (2H, s, CH<sub>2</sub>), 3.81 (3H, s, OCH<sub>3</sub>), 4.30 (1H, s, =CH<sub>2</sub>), 4.73 (1H, s, =CH<sub>2</sub>), 6.85 (2H, d, <sup>3</sup>*J*<sub>HH</sub> = 8.9 Hz, ArH), 7.29 (2H, d, <sup>3</sup>*J*<sub>HH</sub> = 8.2 Hz, ArH), 7.53 (1H, s, NH), 7.58 (2H, d, <sup>3</sup>*J*<sub>HH</sub> = 8.9 Hz, ArH), 7.85 (2H, d, <sup>3</sup>*J*<sub>HH</sub> = 8.2 Hz, ArH).  $\delta_{\text{C}}$  (CDCl<sub>3</sub>, 126 MHz) 21.6 (CH<sub>3</sub>), 23.0 (CH<sub>3</sub>), 36.1 (CH<sub>2</sub>), 55.3 (CH<sub>3</sub>), 112.4 (CH<sub>2</sub>), 113.8 (CH), 127.8 (CH), 128.1 (CH), 129.4 (C), 129.5 (CH), 135.3 (C), 138.2 (C), 144.0 (C), 153.4 (C), 160.9 (C). *m/z* (ESI) 359.1435 (MH<sup>+</sup>, C<sub>19</sub>H<sub>23</sub>N<sub>2</sub>O<sub>3</sub>S requires 359.1429, 100 %).

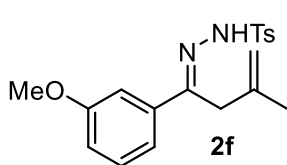

The general procedure was followed using 3-methyl-1-(3-methoxyphenyl)-but-3-en-1-one (1.80 g, 9.5 mmol) and tosyl hydrazide (2.65 g, 14.2 mmol) in absolute methanol (50 mL). (*E*)-*N'*-(1-(3-Methoxyphenyl)-3-methylbut-3-en-1-ylidene)-4-methylbenzenesulfonohydrazide **2f** was obtained as a white

solid (2.17 g, 64 %). Mp 126-128 °C.  $\delta_{\text{H}}$  (CDCl<sub>3</sub>, 400 MHz) 1.77 (3H, s, CH<sub>3</sub>), 2.40 (3H, s, ArCH<sub>3</sub>), 3.28 (2H, s, CH<sub>2</sub>), 3.81 (3H, s, OCH<sub>3</sub>), 4.33 (1H, s, =CH<sub>2</sub>), 4.75 (1H, s, =CH<sub>2</sub>), 6.91 (1H, dd, <sup>4</sup>*J*<sub>HH</sub> = 2.5 Hz, <sup>4</sup>*J*<sub>HH</sub> = 1.0 Hz, ArH), 7.14 - 7.21 (2H, m, ArH), 7.22 - 7.27 (1H, m, ArH), 7.29 (2H, d, <sup>3</sup>*J*<sub>HH</sub> = 8.2 Hz, ArH), 7.66 (1H, s, NH), 7.85 (2H, d, <sup>3</sup>*J*<sub>HH</sub> = 8.2 Hz, ArH).  $\delta_{\text{C}}$  (CDCl<sub>3</sub>, 100 MHz) 21.6 (CH<sub>3</sub>), 23.0 (CH<sub>3</sub>), 36.4 (CH<sub>2</sub>), 55.3 (CH<sub>3</sub>), 111.7 (CH), 112.6 (CH<sub>2</sub>), 115.4 (CH), 118.9 (CH), 128.1 (CH), 129.4 (CH), 129.5 (CH), 135.2 (C), 138.0 (C), 138.3 (C), 144.2 (C), 153.3 (C), 159.6 (C). m/z (ESI) 359.1432 (MH<sup>+</sup>, C<sub>19</sub>H<sub>23</sub>N<sub>2</sub>O<sub>3</sub>S requires 359.1429, 100 %).

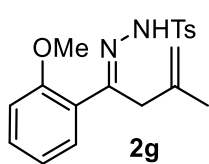

The general procedure was followed using 3-methyl-1-(2-methoxyphenyl)-but-3-en-1-one (1.60 g, 8.4 mmol) and tosyl hydrazide (2.40 g, 12.6 mmol) in absolute methanol (50 mL). (*E*)-*N'*-(1-(2-Methoxyphenyl)-3-methylbut-3-en-1-ylidene)-4-methylbenzenesulfonohydrazide **2g** was obtained as a white solid (2.18 g, 79 %).

Mp 135-37 °C.  $\delta_{\text{H}}$  (CDCl<sub>3</sub>, 400 MHz) 1.63 (3H, s, CH<sub>3</sub>), 2.44 (3H, s, ArCH<sub>3</sub>), 3.35 (2H, s, CH<sub>2</sub>), 3.76 (3H, s, OCH<sub>3</sub>), 4.46 (1H, s, =CH<sub>2</sub>), 4.76 (1H, s, =CH<sub>2</sub>), 6.84 (1H, d, <sup>3</sup>*J*<sub>HH</sub> = 8.2 Hz, ArH), 6.89 (1H, td, <sup>3</sup>*J*<sub>HH</sub> = 7.5 Hz, <sup>4</sup>*J*<sub>HH</sub> = 1.0 Hz, ArH), 7.11 (1H, dd, <sup>3</sup>*J*<sub>HH</sub> = 7.6 Hz, <sup>4</sup>*J*<sub>HH</sub> = 1.8 Hz, ArH), 7.28 - 7.36 (3H, m, ArH), 7.85 (2H, d, <sup>3</sup>*J*<sub>HH</sub> = 8.2 Hz, ArH), 7.94 (1H, s, NH).  $\delta_{\text{C}}$  (CDCl<sub>3</sub>, 126 MHz) 21.7 (CH<sub>3</sub>), 22.7 (CH<sub>3</sub>), 39.5 (CH<sub>2</sub>), 55.3 (CH<sub>3</sub>), 111.0 (CH), 112.5 (CH<sub>2</sub>), 120.6 (CH), 128.0 (C), 128.1 (CH), 129.4 (CH), 130.2 (CH), 130.6 (CH), 135.5 (C), 138.9 (C), 144.0 (C), 155.3 (C), 157.4 (C). m/z (ESI) 359.1429 (MH<sup>+</sup>, C<sub>19</sub>H<sub>23</sub>N<sub>2</sub>O<sub>3</sub>S requires 359.1429, 100 %).

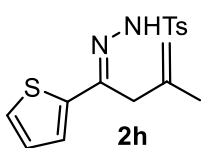

The general procedure was followed using 3-methyl-1-(thiophen-2-yl)but-3-en-1-one (2.34 g, 14.1 mmol) and tosyl hydrazide (3.93 g, 21.1 mmol) in absolute methanol (60 mL) for 96 hours. (*E*)-4-Methyl-*N'*-(3-methyl-1-(thiophen-2-yl)but-3-en-1-ylidene)benzenesulfonohydrazide **2h** was obtained as a pale yellow solid (3.45 g, 73 %).

Mp 156-157 °C.  $\delta_{\text{H}}$  (CDCl<sub>3</sub>, 400 MHz) 1.71 (3H, s, CH<sub>3</sub>), 2.41 (3H, s, ArCH<sub>3</sub>), 3.31 (2H, s, CH<sub>2</sub>), 4.41 (1H, s, =CH<sub>2</sub>), 4.77 (1H, s, =CH<sub>2</sub>), 6.96 (1H, dd, <sup>3</sup>*J*<sub>HH</sub> = 5.0 Hz, <sup>3</sup>*J*<sub>HH</sub> = 3.8 Hz, ArH), 7.17 (1H, dd, <sup>3</sup>*J*<sub>HH</sub> = 3.6 Hz, <sup>4</sup>*J*<sub>HH</sub> = 0.9 Hz, ArH), 7.27 - 7.33 (3H, m, ArH), 7.57 (1H, s, NH), 7.87 (2H, d, <sup>3</sup>*J*<sub>HH</sub> = 8.2 Hz, ArH).  $\delta_{\text{C}}$  (CDCl<sub>3</sub>, 126 MHz) 21.6 (CH<sub>3</sub>), 22.7 (CH<sub>3</sub>), 36.8 (CH<sub>2</sub>), 113.1 (CH<sub>2</sub>), 126.9 (CH), 127.2 (CH), 128.2 (CH), 128.7 (CH), 129.5 (CH), 135.1 (C), 138.0 (C), 142.4 (C), 144.2 (C), 149.4 (C). m/z (ESI) 335.0889 (MH<sup>+</sup>, C<sub>16</sub>H<sub>19</sub>N<sub>2</sub>O<sub>2</sub>S<sub>2</sub> requires 335.0888, 100 %).

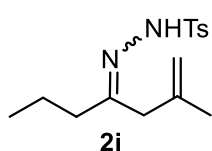

The general procedure was followed using 2-methylhept-1-en-4-one (0.87 g, 6.9 mmol) and tosyl hydrazide (1.92 g, 10.3 mmol) in absolute methanol (25 mL).

The inseparable 60:40 mixture of (*Z*)- and (*E*)-4-Methyl-*N'*-(2-methylhept-1-en-4-ylidene)benzenesulfonohydrazide **2i** was obtained as a white solid (1.63 g, 81 %). Mp 67-70 °C (of mixture 60:40).  $\delta_{\text{H}}$  (CDCl<sub>3</sub>, 400 MHz) 0.83 (3H, t,  $^3J_{\text{HH}} = 7.3$  Hz, Major CH<sub>3</sub>), 0.88 (3H, t,  $^3J_{\text{HH}} = 7.3$  Hz, Minor CH<sub>3</sub>), 1.36 - 1.53 (7H, m, Major CH<sub>2</sub>, Minor CH<sub>2</sub> and Minor CH<sub>3</sub>), 1.66 (3H, s, Major CH<sub>3</sub>), 2.00 - 2.10 (2H, m, Minor CH<sub>2</sub>), 2.11 - 2.20 (2H, m, Major CH<sub>2</sub>), 2.42 (3H, s, Minor ArCH<sub>3</sub>), 2.43 (3H, s, Major ArCH<sub>3</sub>), 2.84 (2H, s, Major CH<sub>2</sub>), 2.87 (2H, s, Minor CH<sub>2</sub>), 4.30 (1H, s, Major =CH<sub>2</sub>), 4.64 (1H, s, Minor =CH<sub>2</sub>), 4.72 (1H, s, Major =CH<sub>2</sub>), 4.77 (1H, s, Minor =CH<sub>2</sub>), 7.29 (4H, d,  $^3J_{\text{HH}} = 8.0$  Hz, Major and Minor ArH), 7.50 (1H, s, Major NH), 7.56 (1H, s, Minor NH), 7.80 (2H, d,  $^3J_{\text{HH}} = 8.4$  Hz, Major ArH), 7.83 (2H, d,  $^3J_{\text{HH}} = 8.4$  Hz, Minor ArH).  $\delta_{\text{C}}$  (CDCl<sub>3</sub>, 126 MHz) 13.7 (CH<sub>3</sub>), 14.1 (CH<sub>3</sub>), 18.5 (CH<sub>2</sub>), 19.1 (CH<sub>2</sub>), 21.57 (CH<sub>3</sub>), 21.60 (CH<sub>3</sub>), 22.9 (CH<sub>3</sub>), 30.2 (CH<sub>2</sub>), 38.6 (CH<sub>2</sub>), 40.2 (CH<sub>2</sub>), 45.8 (CH<sub>2</sub>), 112.4 (CH<sub>2</sub>), 113.7 (CH<sub>2</sub>), 127.9 (C), 128.0 (C), 128.1 (CH), 129.3 (CH), 129.41 (C), 129.45 (C), 135.3 (C), 138.2 (C), 143.9 (C), 158.3 (C). m/z (ASAP) 295.1468 (MH<sup>+</sup>, C<sub>15</sub>H<sub>23</sub>N<sub>2</sub>O<sub>2</sub>S requires 295.1480, 100 %).

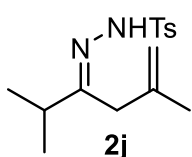

The general procedure was followed using 2,5-dimethylhex-5-en-3-one (2.92 g, 23.2 mmol) and tosyl hydrazide (6.46 g, 34.7 mmol) in absolute methanol (100 mL).

(*E*)-*N'*-(2,5-Dimethylhex-5-en-3-ylidene)-4-methylbenzenesulfonohydrazide **2j**

was obtained as a white solid (1.79 g, 26 %). Mp 78-80 °C.  $\delta_{\text{H}}$  (CDCl<sub>3</sub>, 400 MHz) 0.94 (6H, d,  $^3J_{\text{HH}} = 6.9$  Hz, CH<sub>3</sub>), 1.60 (3H, s, CH<sub>3</sub>), 2.35 (1H, sept,  $^3J_{\text{HH}} = 6.9$  Hz, CH(CH<sub>3</sub>)<sub>2</sub>), 2.36 (3H, s, ArCH<sub>3</sub>), 2.77 (2H, s, CH<sub>2</sub>), 4.07 - 4.13 (1H, s, =CH<sub>2</sub>), 4.63 (1H, s, =CH<sub>2</sub>), 7.22 (2H, d,  $^3J_{\text{HH}} = 8.3$  Hz, ArH), 7.32 (1H, s, NH), 7.73 (2H, d,  $^3J_{\text{HH}} = 8.3$  Hz, ArH).  $\delta_{\text{C}}$  (CDCl<sub>3</sub>, 101 MHz) 19.5 (CH<sub>3</sub>), 21.6 (CH<sub>3</sub>), 23.0 (CH<sub>3</sub>), 36.7 (CH), 36.9 (CH<sub>2</sub>), 112.3 (CH<sub>2</sub>), 128.1 (CH), 129.3 (CH), 135.3 (C), 138.2 (C), 143.9 (C), 161.8 (C). m/z (ESI) 295.1481 (MH<sup>+</sup>, C<sub>15</sub>H<sub>23</sub>N<sub>2</sub>O<sub>2</sub>S requires 295.1480, 100 %).

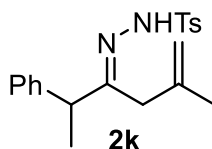

The general procedure was followed using 5-methyl-2-phenylhex-5-en-3-one (0.88 g, 4.7 mmol) and tosyl hydrazide (1.30 g, 10.3 mmol) in absolute methanol (25 mL).

(*E*)-4-methyl-*N'*-(5-methyl-2-phenylhex-5-en-3-ylidene)benzenesulfonohydrazide **2k** was obtained as a white solid (1.12 g, 67 %). Mp 117-119 °C.

$\delta_{\text{H}}$  (CDCl<sub>3</sub>, 500 MHz) 1.35 (3H, d,  $^3J_{\text{HH}} = 7.0$  Hz, CH<sub>3</sub>), 1.50 (3H, s, CH<sub>3</sub>), 2.47 (3H, s, ArCH<sub>3</sub>), 2.63 (1H, d,  $^2J_{\text{HH}} = 16.8$  Hz, CH<sub>A</sub>H<sub>B</sub>), 2.71 (1H, d,  $^2J_{\text{HH}} = 16.8$  Hz, CH<sub>A</sub>H<sub>B</sub>), 3.52 (1H, q,  $^3J_{\text{HH}} = 6.9$  Hz, CH(CH<sub>3</sub>)), 4.20 (1H, s, =CH<sub>2</sub>), 4.67 (1H, s, =CH<sub>2</sub>), 7.06 (2H, d,  $^3J_{\text{HH}} = 6.5$  Hz, ArH), 7.18 - 7.24 (3H, m, ArH), 7.32 (2H, d,  $^3J_{\text{HH}} = 8.2$  Hz, ArH), 7.53 (1H, s, NH), 7.83 (2H, d,  $^3J_{\text{HH}} = 8.2$  Hz).  $\delta_{\text{C}}$  (CDCl<sub>3</sub>, 126 MHz) 18.7 (CH<sub>3</sub>), 21.7 (CH<sub>3</sub>), 22.7 (CH<sub>3</sub>), 37.8 (CH<sub>2</sub>), 47.9 (CH), 112.7 (CH<sub>2</sub>), 126.9

(CH), 127.8 (CH), 128.2 (CH), 128.6 (CH), 129.3 (CH), 135.3 (C), 138.3 (C), 141.7 (C), 144.0 (C), 158.9 (C). *m/z* (ESI) 357.1642 (MH<sup>+</sup>, C<sub>20</sub>H<sub>25</sub>N<sub>2</sub>O<sub>2</sub>S requires 357.1637, 100 %).

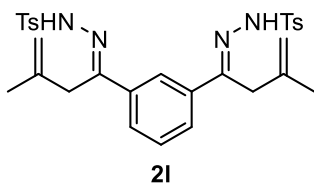

**2I**

The general procedure was followed but using twice the typical equivalents of tosyl hydrazide: 1,1'-(1,3-Phenylene)bis(3-methylbut-3-en-1-one) (1.00 g, 4.1 mmol) and tosyl hydrazide (2.31 g, 12.4 mmol) in absolute methanol (25 mL). *N',N''*-((1*E*,1'*E*)-1,3-Phenylenebis(3-methylbut-3-en-1-yl-1-ylidene))bis(4-methylbenzenesulfonylhydrazide) **2I** was obtained as a white solid (1.48 g, 62 %). Mp 168-170 °C.  $\delta_{\text{H}}$  (CDCl<sub>3</sub>, 400 MHz) 1.79 (6H, s, CH<sub>3</sub>), 2.40 (6H, s, ArCH<sub>3</sub>), 3.29 (4H, s, CH<sub>2</sub>), 4.34 (2H, s, =CH<sub>2</sub>), 4.78 (2H, s, =CH<sub>2</sub>), 7.27 - 7.34 (5H, m, ArH), 7.58 (2H, dd, <sup>3</sup>*J*<sub>HH</sub> = 7.8 Hz, <sup>4</sup>*J*<sub>HH</sub> = 1.8 Hz, ArH), 7.68 (2H, s, NH), 7.84 (4H, d, <sup>2</sup>*J*<sub>HH</sub> = 8.3 Hz, ArH), 7.96 (1H, t, <sup>4</sup>*J*<sub>HH</sub> = 1.7 Hz, ArH).  $\delta_{\text{C}}$  (CDCl<sub>3</sub>, 101 MHz) 21.6 (CH<sub>3</sub>), 23.0 (CH<sub>3</sub>), 36.2 (CH<sub>2</sub>), 112.8 (CH<sub>2</sub>), 124.1 (CH), 127.4 (CH), 128.0 (CH), 128.6 (CH), 129.6 (CH), 135.2 (C), 137.1 (C), 138.0 (C), 144.3 (C), 152.7 (C). *m/z* (ESI) 579.2100 (MH<sup>+</sup>, C<sub>30</sub>H<sub>35</sub>N<sub>4</sub>O<sub>4</sub>S<sub>2</sub> requires 579.2100, 100 %).

### General Procedure A for fluorocyclisations of unsaturated tosyl hydrazones **2** using fluoroiodane and AgBF<sub>4</sub> (Scheme 2)

A Schlenk flask was charged with unsaturated tosyl hydrazone (0.71 mmol), AgBF<sub>4</sub> (140 mg, 0.71 mmol), fluoroiodane (300 mg, 1.07 mmol), 4 Å powdered molecular sieves (180 mg) in dry DCM (2.5 mL) under an inert atmosphere. The reaction mixture was stirred for 15 minutes at room temperature before being concentrated *in vacuo* and the crude product was purified by column chromatography using petroleum ether : ethyl acetate (4:1). Fluorinated tetrahydropyridazines **3a**, **3c**, **3d**, **3e** and **3i** were prepared using this procedure.

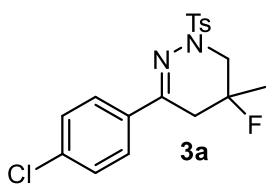

**3a**

3-(4-Chlorophenyl)-5-fluoro-5-methyl-1-tosyl-1,4,5,6-tetrahydropyridazine **3a** was obtained as a white solid (246 mg, 91 %). Crystals suitable for X-ray crystallography were grown by slow evaporation from a DCM and hexane (1:2) solution. Mp 186-189 °C.  $\delta_{\text{H}}$  (CDCl<sub>3</sub>, 400 MHz) 1.56 (3H, d, <sup>3</sup>*J*<sub>HF</sub> = 20.7 Hz, CH<sub>3</sub>), 2.40 (3H, s, ArCH<sub>3</sub>), 2.55 (1H, ddd, <sup>3</sup>*J*<sub>HF</sub> = 26.2 Hz, <sup>2</sup>*J*<sub>HH</sub> = 18.4 Hz, <sup>4</sup>*J*<sub>HH</sub> = 1.7 Hz, CHCH<sub>D</sub>), 2.81 (1H, t, <sup>2</sup>*J*<sub>HH</sub> = <sup>3</sup>*J*<sub>HF</sub> = 18.2 Hz, CHCH<sub>D</sub>), 3.21 (1H, dd, <sup>3</sup>*J*<sub>HF</sub> = 23.3 Hz, <sup>2</sup>*J*<sub>HH</sub> = 11.8 Hz, NCH<sub>A</sub>H<sub>B</sub>), 3.77 (1H, ddd, <sup>2</sup>*J*<sub>HH</sub> = 11.8 Hz, <sup>3</sup>*J*<sub>HF</sub> = 7.7 Hz, <sup>4</sup>*J*<sub>HH</sub> = 2.0 Hz, NCH<sub>A</sub>H<sub>B</sub>), 7.30 (2H, d, <sup>3</sup>*J*<sub>HH</sub> = 8.2 Hz, ArH) 7.33 (2H, d, <sup>3</sup>*J*<sub>HH</sub> = 8.8 Hz, ArH), 7.61 (2H, d, <sup>3</sup>*J*<sub>HH</sub> = 8.8 Hz, ArH), 7.82 (2H, d, <sup>3</sup>*J*<sub>HH</sub> = 8.2 Hz, ArH).  $\delta_{\text{H}\{\text{F}\}}$  (CDCl<sub>3</sub>, 400 MHz) 1.56 (3H, s, CH<sub>3</sub>), 2.40 (3H, s, ArCH<sub>3</sub>), 2.55 (1H, dd, <sup>2</sup>*J*<sub>HH</sub> = 18.4 Hz, <sup>4</sup>*J*<sub>HH</sub> = 1.7 Hz, CHCH<sub>D</sub>), 2.81 (1H, d, <sup>2</sup>*J*<sub>HH</sub> = 18.4 Hz, CHCH<sub>D</sub>), 3.21 (1H, d, <sup>2</sup>*J*<sub>HH</sub> = 11.7 Hz, NCH<sub>A</sub>H<sub>B</sub>),

3.77 (1H, dd,  $^2J_{\text{HH}} = 11.8$  Hz,  $^4J_{\text{HH}} = 2.1$  Hz,  $\text{NCH}_\text{A}\text{H}_\text{B}$ ), 7.30 (2H, d,  $^3J_{\text{HH}} = 8.4$  Hz, ArH) 7.33 (2H, d,  $^3J_{\text{HH}} = 8.8$  Hz, ArH), 7.61 (2H, d,  $^3J_{\text{HH}} = 8.8$  Hz, ArH), 7.82 (2H, d,  $^3J_{\text{HH}} = 8.4$  Hz, ArH).  $\delta_\text{C}$  ( $\text{CDCl}_3$ , 126 MHz) 21.6 ( $\text{CH}_3$ ), 24.8 (d,  $^2J_{\text{CF}} = 24.1$  Hz,  $\text{CH}_3$ ), 35.0 (d,  $^2J_{\text{CF}} = 26.1$  Hz,  $\text{CH}_2$ ), 50.3 (d,  $^2J_{\text{CF}} = 25.1$  Hz,  $\text{CH}_2$ ), 87.6 (d,  $^1J_{\text{CF}} = 175.7$  Hz, C), 126.7 (CH), 128.4 (CH), 128.7 (CH), 129.6 (CH), 133.2 (C), 134.4 (C), 135.8 (C), 144.4 (C), 145.9 (C).  $\delta_\text{F}$  ( $\text{CDCl}_3$ , 376 MHz) -142.1 (s).  $m/z$  (ESI) 381.0841 ( $\text{MH}^+$ ,  $\text{C}_{18}\text{H}_{19}^{35}\text{ClFN}_2\text{O}_2\text{S}$  requires 381.0840, 100 %), 383.0816 ( $\text{MH}^+$ ,  $\text{C}_{18}\text{H}_{19}^{37}\text{ClFN}_2\text{O}_2\text{S}$  requires 383.0810, 40 %).

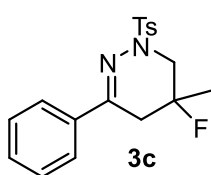

5-Fluoro-5-methyl-3-phenyl-1-tosyl-1,4,5,6-tetrahydropyridazine **3c** was obtained as a white solid (229 mg, 93 %). Crystals suitable for X-ray crystallography were grown by slow evaporation from a DCM and hexane (1:2) solution. Mp 157-158 °C.  $\delta_\text{H}$  ( $\text{CDCl}_3$ , 400 MHz) 1.56 (3H, d,  $^3J_{\text{HF}} = 20.5$  Hz,  $\text{CH}_3$ ),

2.40 (3H, s,  $\text{ArCH}_3$ ), 2.59 (1H, ddd,  $^3J_{\text{HF}} = 25.3$  Hz,  $^2J_{\text{HH}} = 18.4$  Hz,  $^4J_{\text{HH}} = 1.6$  Hz,  $\text{CH}_\text{C}\text{H}_\text{D}$ ), 2.86 (1H, t,  $^2J_{\text{HH}} = ^3J_{\text{HF}} = 18.4$  Hz,  $\text{CH}_\text{C}\text{H}_\text{D}$ ), 3.21 (1H, dd,  $^3J_{\text{HF}} = 22.5$  Hz,  $^2J_{\text{HH}} = 11.7$  Hz,  $\text{NCH}_\text{A}\text{H}_\text{B}$ ), 3.72 (1H, ddd,  $^2J_{\text{HH}} = 11.7$  Hz,  $^3J_{\text{HF}} = 7.7$  Hz,  $^4J_{\text{HH}} = 2.0$  Hz,  $\text{NCH}_\text{A}\text{H}_\text{B}$ ), 7.30 (2H, d,  $^3J_{\text{HH}} = 8.2$  Hz, ArH), 7.33 - 7.43 (3H, m, ArH), 7.59 - 7.74 (2H, m, ArH), 7.85 (2H, d,  $^3J_{\text{HH}} = 8.2$  Hz, ArH).  $\delta_{\text{H}\{\text{F}\}}$  ( $\text{CDCl}_3$ , 400 MHz) 1.56 (3H, s,  $\text{CH}_3$ ), 2.40 (3H, s,  $\text{ArCH}_3$ ), 2.59 (1H, br d,  $^2J_{\text{HH}} = 18.2$  Hz,  $\text{CH}_\text{C}\text{H}_\text{D}$ ), 2.86 (1H, br d,  $^2J_{\text{HH}} = 18.4$  Hz,  $\text{CH}_\text{C}\text{H}_\text{D}$ ), 3.24 (1H, br d,  $^2J_{\text{HH}} = 11.7$  Hz,  $\text{NCH}_\text{A}\text{H}_\text{B}$ ), 3.72 (1H, dd,  $^2J_{\text{HH}} = 11.7$  Hz,  $^4J_{\text{HH}} = 1.8$  Hz,  $\text{NCH}_\text{A}\text{H}_\text{B}$ ), 7.30 (2H, d,  $^3J_{\text{HH}} = 8.2$  Hz, ArH), 7.34 - 7.40 (3H, m ArH), 7.63 - 7.71 (2H, m, ArH), 7.85 (2H, d,  $^3J_{\text{HH}} = 8.2$  Hz, ArH).  $\delta_\text{C}$  ( $\text{CDCl}_3$ , 126 MHz) [overlapping CH signals at 128.4] 21.6 ( $\text{CH}_3$ ), 24.9 (d,  $^2J_{\text{CF}} = 24.1$  Hz,  $\text{CH}_3$ ), 35.2 (d,  $^2J_{\text{CF}} = 25.1$  Hz,  $\text{CH}_2$ ), 50.5 (d,  $^2J_{\text{CF}} = 26.1$  Hz,  $\text{CH}_2$ ), 87.9 (d,  $^1J_{\text{CF}} = 175.7$  Hz, C), 125.5 (CH), 128.4 (CH), 129.6 (CH), 129.8 (CH), 133.3 (C), 135.9 (C), 144.2 (C), 147.2 (C).  $\delta_\text{F}$  ( $\text{CDCl}_3$ , 376 MHz) -141.9 (s).  $m/z$  (ESI) 347.1231 ( $\text{MH}^+$ ,  $\text{C}_{18}\text{H}_{20}\text{FN}_2\text{O}_2\text{S}$  requires 347.1230, 100 %).

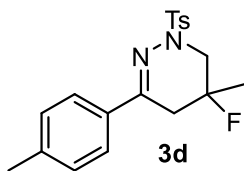

5-Fluoro-5-methyl-3-(*p*-tolyl)-1-tosyl-1,4,5,6-tetrahydropyridazine **3d** was obtained as a white solid (241 mg, 94 %). Mp 161-163 °C.  $\delta_\text{H}$  ( $\text{CDCl}_3$ , 400 MHz) 1.55 (3H, d,  $^3J_{\text{HF}} = 20.7$  Hz,  $\text{CH}_3$ ), 2.36 (3H, s,  $\text{ArCH}_3$ ), 2.39 (3H, s,  $\text{ArCH}_3$ ), 2.57 (1H, ddd,  $^3J_{\text{HF}} = 25.0$  Hz,  $^2J_{\text{HH}} = 18.4$  Hz,  $^4J_{\text{HH}} = 1.9$  Hz  $\text{CH}_\text{C}\text{H}_\text{D}$ ), 2.83 (1H,

t,  $^2J_{\text{HH}} = ^3J_{\text{HF}} = 18.4$  Hz,  $\text{CH}_\text{C}\text{H}_\text{D}$ ), 3.23 (1H, br dd,  $^3J_{\text{HF}} = 22.3$  Hz,  $^2J_{\text{HH}} = 11.7$  Hz,  $\text{NCH}_\text{A}\text{H}_\text{B}$ ), 3.68 (1H, ddd,  $^2J_{\text{HH}} = 11.6$  Hz,  $^3J_{\text{HF}} = 7.7$  Hz,  $^4J_{\text{HH}} = 1.9$  Hz,  $\text{NCH}_\text{A}\text{H}_\text{B}$ ), 7.17 (2H, d,  $^3J_{\text{HH}} = 8.0$  Hz, ArH), 7.29 (2H, d,  $^3J_{\text{HH}} = 8.0$  Hz, ArH), 7.58 (2H, d,  $^3J_{\text{HH}} = 8.3$  Hz, ArH), 7.84 (2H, d,  $^3J_{\text{HH}} = 8.3$  Hz, ArH).  $\delta_{\text{H}\{\text{F}\}}$  ( $\text{CDCl}_3$ , 400 MHz) 1.55 (3H, s,  $\text{CH}_3$ ), 2.36 (3H, s,  $\text{ArCH}_3$ ), 2.39 (3H, s,  $\text{ArCH}_3$ ), 2.57 (1H, br d,  $^2J_{\text{HH}} = 18.4$  Hz,  $\text{CH}_\text{C}\text{H}_\text{D}$ ), 2.83 (1H, br d,  $^2J_{\text{HH}} = 18.4$  Hz,  $\text{CH}_\text{C}\text{H}_\text{D}$ ), 3.23 (1H, br d,  $^2J_{\text{HH}} = 11.7$  Hz,  $\text{NCH}_\text{A}\text{H}_\text{B}$ ), 3.68 (1H, dd,  $^2J_{\text{HH}} = 11.7$  Hz,  $^4J_{\text{HH}} = 1.9$  Hz,  $\text{NCH}_\text{A}\text{H}_\text{B}$ ), 7.17 (2H, d,  $^3J_{\text{HH}} = 8.0$  Hz, ArH),

7.29 (2H, d,  $^3J_{\text{HH}} = 8.0$  Hz, ArH), 7.58 (2H, d,  $^3J_{\text{HH}} = 8.3$  Hz, ArH), 7.84 (2H, d,  $^3J_{\text{HH}} = 8.3$  Hz, ArH).  $\delta_{\text{C}}$  (CDCl<sub>3</sub>, 126 MHz) [overlapping C signals at 133.2] 21.3 (CH<sub>3</sub>), 21.6 (CH<sub>3</sub>), 24.9 (d,  $^2J_{\text{CF}} = 24.1$  Hz, CH<sub>3</sub>), 35.2 (d,  $^2J_{\text{CF}} = 25.1$  Hz, CH<sub>2</sub>), 50.5 (d,  $^2J_{\text{CF}} = 26.1$  Hz, CH<sub>2</sub>), 88.0 (d,  $^1J_{\text{CF}} = 175.7$  Hz, C), 125.4 (CH), 128.4 (CH), 129.1 (CH), 129.5 (CH), 133.2 (C), 139.9 (C), 144.2 (C), 147.4 (C).  $\delta_{\text{F}}$  (CDCl<sub>3</sub>, 376 MHz) -141.7 (s). m/z (ESI) 361.1382 (MH<sup>+</sup>, C<sub>19</sub>H<sub>22</sub>FN<sub>2</sub>O<sub>2</sub>S requires 361.1386, 100 %).

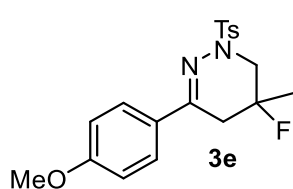

5-Fluoro-3-(4-methoxyphenyl)-5-methyl-1-tosyl-1,4,5,6-tetrahydropyridazine **3e** was obtained as a white solid (243 mg, 91 %). Mp 163-165 °C.  $\delta_{\text{H}}$

(CDCl<sub>3</sub>, 400 MHz) 1.55 (3H, d,  $^3J_{\text{HF}} = 20.7$  Hz, CH<sub>3</sub>), 2.40 (3H, s, ArCH<sub>3</sub>), 2.57 (1H, ddd,  $^3J_{\text{HF}} = 26.4$  Hz,  $^2J_{\text{HH}} = 18.5$  Hz,  $^4J_{\text{HH}} = 1.5$  Hz, CH<sub>CHD</sub>), 2.82 (1H, t,  $^2J_{\text{HH}} = ^3J_{\text{HF}} = 18.5$  Hz, CH<sub>CHD</sub>), 3.21 (1H, dd,  $^3J_{\text{HF}} = 22.0$  Hz,  $^2J_{\text{HH}} = 11.7$  Hz, NCH<sub>A</sub>H<sub>B</sub>), 3.66 (1H, ddd,  $^2J_{\text{HH}} = 11.7$  Hz,  $^3J_{\text{HF}} = 7.7$  Hz,  $^4J_{\text{HH}} = 1.8$  Hz, NCH<sub>A</sub>H<sub>B</sub>), 3.83 (3H, s, OCH<sub>3</sub>), 6.88 (2H, d,  $^3J_{\text{HH}} = 9.0$  Hz, ArH), 7.30 (2H, d,  $^3J_{\text{HH}} = 8.1$  Hz, ArH), 7.63 (2H, d,  $^3J_{\text{HH}} = 9.0$  Hz, ArH), 7.84 (2H, d,  $^3J_{\text{HH}} = 8.1$  Hz, ArH).  $\delta_{\text{H}\{\text{F}\}}$  (CDCl<sub>3</sub>, 400 MHz) 1.55 (3H, s, CH<sub>3</sub>), 2.39 (3H, s, ArCH<sub>3</sub>), 2.57 (1H, dd,  $^2J_{\text{HH}} = 18.5$  Hz,  $^4J_{\text{HH}} = 1.5$  Hz, CH<sub>CHD</sub>), 2.82 (1H, br. d,  $^2J_{\text{HH}} = 18.5$  Hz, CH<sub>CHD</sub>), 3.21 (1H, br. d,  $^2J_{\text{HH}} = 11.7$  Hz, NCH<sub>A</sub>H<sub>B</sub>), 3.67 (1H, dd,  $^2J_{\text{HH}} = 11.7$  Hz,  $^4J_{\text{HH}} = 1.9$  Hz, NCH<sub>A</sub>H<sub>B</sub>), 3.82 (3H, s, OCH<sub>3</sub>), 6.87 (2H, d,  $^3J_{\text{HH}} = 9.0$  Hz, ArH), 7.30 (2H, d,  $^3J_{\text{HH}} = 8.1$  Hz, ArH), 7.63 (2H, d,  $^3J_{\text{HH}} = 9.0$  Hz, ArH), 7.84 (2H, d,  $^3J_{\text{HH}} = 8.1$  Hz, ArH).  $\delta_{\text{C}}$  (CDCl<sub>3</sub>, 126 MHz) 21.6 (CH<sub>3</sub>), 24.9 (d,  $^2J_{\text{CF}} = 24.1$  Hz, CH<sub>3</sub>), 35.2 (d,  $^2J_{\text{CF}} = 25.1$  Hz, CH<sub>2</sub>), 50.5 (br d,  $^2J_{\text{CF}} = 27.1$  Hz, CH<sub>2</sub>), 55.4 (CH<sub>3</sub>), 88.1 (d,  $^1J_{\text{CF}} = 175.7$  Hz, C), 113.8 (CH), 127.0 (CH), 128.5 (CH), 128.6 (C), 129.5 (CH), 133.2 (C), 144.2 (C), 147.2 (C), 160.9 (C).  $\delta_{\text{F}}$  (CDCl<sub>3</sub>, 376 MHz) -141.6 (s). m/z (ESI) 377.1344 (MH<sup>+</sup>, C<sub>19</sub>H<sub>22</sub>FN<sub>2</sub>O<sub>3</sub>S requires 377.1335, 100 %).

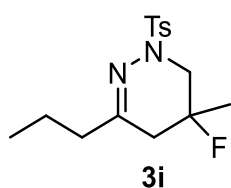

5-Fluoro-5-methyl-3-propyl-1-tosyl-1,4,5,6-tetrahydropyridazine **3i** was obtained as a white solid (180 mg, 81 %). Mp 75-77 °C.  $\delta_{\text{H}}$  (CDCl<sub>3</sub>, 400 MHz)

0.82 (3H, t,  $^3J_{\text{HH}} = 7.4$  Hz, CH<sub>3</sub>), 1.45 (3H, d,  $^3J_{\text{HF}} = 20.8$  Hz, CH<sub>3</sub>), 1.50 (2H, sxt,  $^3J_{\text{HH}} = 7.4$  Hz, CH<sub>2</sub>), 2.07 - 2.19 (3H, m, CH<sub>2</sub> and CH<sub>CHD</sub>), 2.33 (1H, t,  $^3J_{\text{HF}} = ^2J_{\text{HH}} = 18.5$  Hz, CH<sub>CHD</sub>), 2.42 (3H, s, ArCH<sub>3</sub>), 3.09 (1H, dd,  $^3J_{\text{HF}} = 21.9$  Hz,  $^2J_{\text{HH}} = 11.5$  Hz, NCH<sub>A</sub>H<sub>B</sub>), 3.49 (1H, ddd,  $^2J_{\text{HH}} = 11.5$  Hz,  $^3J_{\text{HF}} = 8.2$  Hz,  $^4J_{\text{HH}} = 1.9$  Hz, NCH<sub>A</sub>H<sub>B</sub>), 7.29 (2H, d,  $^3J_{\text{HH}} = 8.2$  Hz, ArH), 7.78 (2H, d,  $^3J_{\text{HH}} = 8.2$  Hz, ArH).  $\delta_{\text{H}\{\text{F}\}}$  (CDCl<sub>3</sub>, 400 MHz) 0.82 (3H, t,  $^3J_{\text{HH}} = 7.3$  Hz, CH<sub>3</sub>), 1.45 (3H, s, CH<sub>3</sub>), 1.50 (2H, sxt,  $^3J_{\text{HH}} = 7.4$  Hz, CH<sub>2</sub>), 2.09 - 2.20 (3H, m, CH<sub>2</sub> and CH<sub>CHD</sub>), 2.31 (1H, d,  $^2J_{\text{HH}} = 18.8$  Hz, CH<sub>CHD</sub>), 2.42 (3H, s, ArCH<sub>3</sub>), 3.09 (1H, br d,  $^2J_{\text{HH}} = 11.7$  Hz, NCH<sub>A</sub>H<sub>B</sub>), 3.49 (1H, dd,  $^2J_{\text{HH}} = 11.7$  Hz,  $^4J_{\text{HH}} = 1.8$  Hz, NCH<sub>A</sub>H<sub>B</sub>), 7.29 (2H, d,  $^3J_{\text{HH}} = 8.2$  Hz, ArH), 7.78 (2H, d,  $^3J_{\text{HH}} = 8.2$  Hz, ArH).  $\delta_{\text{C}}$  (CDCl<sub>3</sub>, 126 MHz) 13.4 (CH<sub>3</sub>), 19.4 (CH<sub>2</sub>), 21.6 (CH<sub>3</sub>), 24.7 (d,  $^2J_{\text{CF}} = 24.1$  Hz, CH<sub>3</sub>), 37.5 (d,  $^2J_{\text{CF}} = 25.1$  Hz, CH<sub>2</sub>), 39.0 (CH<sub>2</sub>), 50.7 (d,  $^2J_{\text{CF}} = 27.1$  Hz, CH<sub>2</sub>), 88.1 (d,  $^1J_{\text{CF}} =$

175.7 Hz, C), 128.5 (CH), 129.3 (CH), 132.9 (C), 144.0 (C), 153.3 (C).  $\delta_F$  (CDCl<sub>3</sub>, 376 MHz) -141.7 (s). m/z (ESI) 313.1381 (MH<sup>+</sup>, C<sub>15</sub>H<sub>22</sub>FN<sub>2</sub>O<sub>2</sub>S requires 313.1386, 100 %).

### General Procedure B for fluorocyclisations of unsaturated tosyl hydrazones **2** using fluoroiodane in HFIP (Scheme 2)

A Schlenk flask was charged with unsaturated tosyl hydrazone (0.71 mmol), fluoroiodane **1** (300 mg, 1.07 mmol), 4 Å powdered molecular sieves (180 mg) and dry HFIP (1.2 mL) under an inert atmosphere. The reaction mixture was stirred for 15 minutes at room temperature before being concentrated *in vacuo* and the crude product was purified by column chromatography using petroleum ether : ethyl acetate (4:1). Fluorinated tetrahydropyridazines **3a-l** were prepared using this procedure.

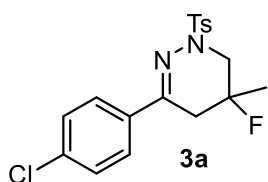

3-(4-Chlorophenyl)-5-fluoro-5-methyl-1-tosyl-1,4,5,6-tetrahydropyridazine **3a** was obtained as a white solid (250 mg, 93 %).

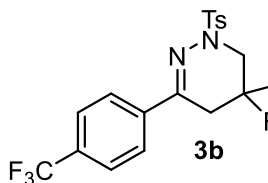

5-Fluoro-5-methyl-1-tosyl-3-(4-(trifluoromethyl)phenyl)-1,4,5,6-tetrahydropyridazine **3b** was obtained as a white solid (265 mg, 90 %). Mp 197-198 °C.  $\delta_H$  (CDCl<sub>3</sub>, 400 MHz) 1.58 (3H, d,  $^3J_{HF}$  = 20.2 Hz, CH<sub>3</sub>), 2.41 (3H, s, ArCH<sub>3</sub>), 2.58 (1H, ddd,  $^3J_{HF}$  = 27.0 Hz,  $^2J_{HH}$  = 18.4 Hz,  $^4J_{HH}$  = 1.6 Hz, CHcH<sub>D</sub>), 2.85 (1H, t,  $^3J_{HF}$  =  $^2J_{HH}$  = 18.4 Hz, CHcH<sub>D</sub>), 3.24 (1H, dd,  $^3J_{HF}$  = 24.5 Hz,  $^2J_{HH}$  = 11.9 Hz, NCH<sub>A</sub>H<sub>B</sub>), 3.84 (1H, ddd,  $^2J_{HH}$  = 12.0 Hz,  $^3J_{HF}$  = 7.7 Hz,  $^4J_{HH}$  = 2.1 Hz, NCH<sub>A</sub>H<sub>B</sub>), 7.31 (2H, d,  $^3J_{HH}$  = 8.0 Hz, ArH), 7.62 (2H, d,  $^3J_{HH}$  = 8.4 Hz, ArH), 7.78 (2H, d,  $^3J_{HH}$  = 8.2 Hz, ArH), 7.83 (2H, d,  $^3J_{HH}$  = 8.4 Hz, ArH).  $\delta_{H\{F\}}$  (CDCl<sub>3</sub>, 400 MHz) 1.58 (3H, s, CH<sub>3</sub>), 2.41 (3H, s, ArCH<sub>3</sub>), 2.58 (1H, dd,  $^2J_{HH}$  = 18.4 Hz,  $^4J_{HH}$  = 1.6 Hz, CHcH<sub>D</sub>), 2.85 (1H, d,  $^2J_{HH}$  = 18.4 Hz, CHcH<sub>D</sub>), 3.24 (1H, d,  $^2J_{HH}$  = 11.9 Hz, NCH<sub>A</sub>H<sub>B</sub>), 3.84 (1H, dd,  $^2J_{HH}$  = 12.0 Hz,  $^4J_{HH}$  = 2.1 Hz, NCH<sub>A</sub>H<sub>B</sub>), 7.31 (2H, d,  $^3J_{HH}$  = 8.0 Hz, ArH), 7.62 (2H, d,  $^3J_{HH}$  = 8.6 Hz, ArH), 7.78 (2H, d,  $^3J_{HH}$  = 8.6 Hz, ArH), 7.83 (2H, d,  $^3J_{HH}$  = 8.2 Hz, ArH).

$\delta_C$  (CDCl<sub>3</sub>, 100 MHz) 21.6 (CH<sub>3</sub>), 24.8 (d,  $^2J_{CF}$  = 24.0 Hz, CH<sub>3</sub>), 35.0 (d,  $^2J_{CF}$  = 25.6 Hz, CH<sub>2</sub>), 50.3 (d,  $^2J_{CF}$  = 25.6 Hz, CH<sub>2</sub>), 87.4 (d,  $^1J_{CF}$  = 176.2 Hz, C), 123.9 (q,  $^1J_{CF}$  = 272.2 Hz, C), 125.4 (q,  $^3J_{CF}$  = 3.8 Hz, CH), 125.7 (CH), 128.3 (CH), 129.7 (CH), 131.4 (q,  $^2J_{CF}$  = 32.3 Hz, C), 133.3 (C), 139.2 (C), 144.5 (C), 145.3 (C).  $\delta_F$  (CDCl<sub>3</sub>, 376 MHz) -62.8 (3F, s, CF<sub>3</sub>), -142.3 (1F, s, CF(CH<sub>3</sub>)). m/z (ESI) 415.1102 (MH<sup>+</sup>, C<sub>19</sub>H<sub>19</sub>F<sub>4</sub>N<sub>2</sub>O<sub>2</sub>S requires 415.1103, 100 %).

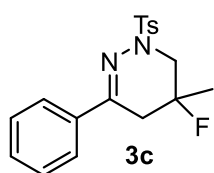

5-Fluoro-5-methyl-3-phenyl-1-tosyl-1,4,5,6-tetrahydropyridazine **3c** was obtained as a white solid (243 mg, 99 %).

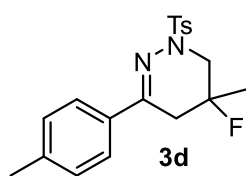

5-Fluoro-5-methyl-3-(*p*-tolyl)-1-tosyl-1,4,5,6-tetrahydropyridazine **3d** was obtained as a white solid (233 mg, 92 %).

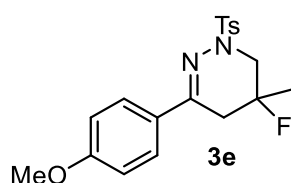

5-Fluoro-3-(4-methoxyphenyl)-5-methyl-1-tosyl-1,4,5,6-tetrahydropyridazine **3e** was obtained as a white solid (240 mg, 90 %).

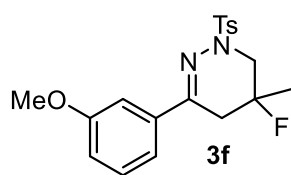

5-Fluoro-3-(3-methoxyphenyl)-5-methyl-1-tosyl-1,4,5,6-tetrahydropyridazine **3f** was obtained as an off-white solid (253 mg, 95 %). Mp 114-116 °C.

$\delta_{\text{H}}$  (CDCl<sub>3</sub>, 400 MHz) 1.55 (3H, d,  $^3J_{\text{HF}} = 20.5$  Hz, CH<sub>3</sub>), 2.40 (3H, s, ArCH<sub>3</sub>), 2.57 (1H, ddd,  $^3J_{\text{HF}} = 26.1$  Hz,  $^2J_{\text{HH}} = 18.4$  Hz,  $^4J_{\text{HH}} = 1.8$  Hz, CHCH<sub>D</sub>), 2.83 (1H, td,  $^2J_{\text{HH}} = ^3J_{\text{HF}} = 18.2$  Hz,  $^4J_{\text{HH}} = 1.0$  Hz, CHCH<sub>D</sub>), 3.21 (1H, ddd,  $^3J_{\text{HF}} = 23.1$  Hz,  $^2J_{\text{HH}} = 11.8$  Hz,  $^4J_{\text{HH}} = 1.8$  Hz, NCH<sub>A</sub>H<sub>B</sub>), 3.74 (1H, ddd,  $^2J_{\text{HH}} = 11.7$  Hz,  $^3J_{\text{HF}} = 7.6$  Hz,  $^4J_{\text{HH}} = 2.0$  Hz, NCH<sub>A</sub>H<sub>B</sub>), 3.84 (3H, s, OCH<sub>3</sub>), 6.91 (1H, ddd,  $^3J_{\text{HH}} = 8.1$  Hz,  $^4J_{\text{HH}} = 2.4$  Hz,  $^4J_{\text{HH}} = 1.0$  Hz, ArH), 7.21 (1H, dt,  $^3J_{\text{HH}} = 8.2$  Hz,  $^4J_{\text{HH}} = 1.5$  Hz, ArH), 7.24 - 7.27 (2H, m, ArH), 7.30 (2H, d,  $^3J_{\text{HH}} = 8.0$  Hz, ArH), 7.84 (2H, d,  $^3J_{\text{HH}} = 8.2$  Hz, ArH).  $\delta_{\text{H}\{\text{F}\}}$  (CDCl<sub>3</sub>, 400 MHz) 1.55 (3H, s, CH<sub>3</sub>), 2.39 (3H, s, ArCH<sub>3</sub>), 2.57 (1H, dd,  $^2J_{\text{HH}} = 18.4$  Hz,  $^4J_{\text{HH}} = 1.8$  Hz, CHCH<sub>D</sub>), 2.84 (1H, d,  $^2J_{\text{HH}} = 18.4$  Hz, CHCH<sub>D</sub>), 3.21 (1H, d,  $^2J_{\text{HH}} = 11.7$  Hz, NCH<sub>A</sub>H<sub>B</sub>), 3.75 (1H, d,  $^2J_{\text{HH}} = 11.7$  Hz, NCH<sub>A</sub>H<sub>B</sub>), 3.83 (3H, s, OCH<sub>3</sub>), 6.91 (1H, ddd,  $^3J_{\text{HH}} = 8.1$ ,  $^4J_{\text{HH}} = 2.5$  Hz,  $^4J_{\text{HH}} = 1.1$  Hz, ArH), 7.18 - 7.23 (1H, m, ArH), 7.24 - 7.27 (2H, m, ArH), 7.29 (2H, d,  $^3J_{\text{HH}} = 8.0$  Hz, ArH), 7.84 (2H, d,  $^3J_{\text{HH}} = 8.2$  Hz, ArH).  $\delta_{\text{C}}$  (CDCl<sub>3</sub>, 126 MHz) 21.6 (CH<sub>3</sub>), 24.9 (d,  $^2J_{\text{CF}} = 24.0$  Hz, CH<sub>3</sub>), 35.3 (d,  $^2J_{\text{CF}} = 25.6$  Hz, CH<sub>2</sub>), 50.4 (d,  $^2J_{\text{CF}} = 25.7$  Hz, CH<sub>2</sub>), 55.3 (CH<sub>3</sub>), 87.9 (d,  $^1J_{\text{CF}} = 175.9$  Hz, C), 110.8 (CH), 115.6 (CH), 118.0 (CH), 128.5 (CH), 129.4 (CH), 129.6 (CH), 133.3 (C), 137.4 (C), 144.3 (C), 147.0 (d,  $^3J_{\text{CF}} = 1.9$  Hz, C), 159.6 (C).  $\delta_{\text{F}}$  (CDCl<sub>3</sub>, 376 MHz) -141.9 (s). m/z (ESI) 377.1336 (MH<sup>+</sup>, C<sub>19</sub>H<sub>22</sub>FN<sub>2</sub>O<sub>3</sub>S requires 377.1335, 100 %).



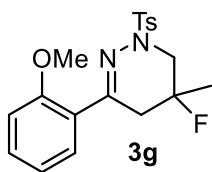

5-Fluoro-3-(2-methoxyphenyl)-5-methyl-1-tosyl-1,4,5,6-tetrahydropyridazine **3g**

pure product was obtained as a white solid (232 mg, 87 %). Mp 133-135 °C.  $\delta_{\text{H}}$  ( $\text{CDCl}_3$ , 400 MHz) 1.51 (3H, d,  $^3J_{\text{HF}} = 20.5$ ,  $\text{CH}_3$ ), 2.43 (3H, s,  $\text{ArCH}_3$ ), 2.72 (1H, ddd,  $^3J_{\text{HF}} = 24.4$  Hz,  $^2J_{\text{HH}} = 18.6$  Hz,  $^4J_{\text{HH}} = 1.0$  Hz,  $\text{CHC}_\text{H}_\text{D}$ ), 2.83 (1H, td,  $^3J_{\text{HF}} = 24.4$  Hz,  $^2J_{\text{HH}} = 18.6$  Hz,  $^4J_{\text{HH}} = 1.0$  Hz,  $\text{CHC}_\text{H}_\text{D}$ ), 3.27 (1H, ddd,  $^3J_{\text{HF}} = 24.4$  Hz,  $^2J_{\text{HH}} = 12.0$  Hz,  $^4J_{\text{HH}} = 1.0$  Hz,  $\text{NCH}_\text{A}\text{H}_\text{B}$ ), 3.74 (1H, ddd,  $^2J_{\text{HH}} = 12.0$  Hz,  $^3J_{\text{HF}} = 10.5$  Hz,  $^4J_{\text{HH}} = 2.1$  Hz,  $\text{NCH}_\text{A}\text{H}_\text{B}$ ), 3.78 (3H, s,  $\text{OCH}_3$ ), 6.86 (1H, dd,  $^3J_{\text{HH}} = 8.7$  Hz,  $^4J_{\text{HH}} = 0.8$  Hz,  $\text{ArH}$ ), 6.93 (1H, td,  $^3J_{\text{HH}} = 7.5$  Hz,  $^4J_{\text{HH}} = 1.0$  Hz,  $\text{ArH}$ ), 7.28 - 7.35 (4H, m,  $\text{ArH}$ ), 7.83 (2H, d,  $^3J_{\text{HH}} = 8.3$  Hz,  $\text{ArH}$ ).  $\delta_{\text{H}\{\text{F}\}}$  ( $\text{CDCl}_3$ , 400 MHz) 1.50 (3H, s,  $\text{CH}_3$ ), 2.43 (3H, s,  $\text{ArCH}_3$ ), 2.72 (1H, dd,  $^2J_{\text{HH}} = 18.6$  Hz,  $^4J_{\text{HH}} = 1.0$  Hz,  $\text{CHC}_\text{H}_\text{D}$ ), 2.83 (1H, dd,  $^2J_{\text{HH}} = 18.6$  Hz,  $^4J_{\text{HH}} = 1.5$  Hz,  $\text{CHC}_\text{H}_\text{D}$ ), 3.27 (1H, d,  $^2J_{\text{HH}} = 12.0$  Hz,  $\text{NCH}_\text{A}\text{H}_\text{B}$ ), 3.74 (1H, dd,  $^2J_{\text{HH}} = 12.0$  Hz,  $^4J_{\text{HH}} = 2.1$  Hz,  $\text{NCH}_\text{A}\text{H}_\text{B}$ ), 3.78 (3H, s,  $\text{OCH}_3$ ), 6.87 (1H, dd,  $^3J_{\text{HH}} = 8.7$  Hz,  $^4J_{\text{HH}} = 0.8$  Hz,  $\text{ArH}$ ), 6.93 (1H, td,  $^3J_{\text{HH}} = 7.5$  Hz,  $^4J_{\text{HH}} = 1.0$  Hz,  $\text{ArH}$ ), 7.29 - 7.35 (4H, m,  $\text{ArH}$ ), 7.83 (2H, d,  $^3J_{\text{HH}} = 8.4$  Hz,  $\text{ArH}$ ).  $\delta_{\text{C}}$  ( $\text{CDCl}_3$ , 100 MHz) 21.6 ( $\text{CH}_3$ ), 24.7 (d,  $^2J_{\text{CF}} = 24.2$  Hz,  $\text{CH}_3$ ), 38.3 (d,  $^2J_{\text{CF}} = 24.8$  Hz,  $\text{CH}_2$ ), 51.0 (d,  $^2J_{\text{CF}} = 25.7$  Hz,  $\text{CH}_2$ ), 55.4 ( $\text{CH}_3$ ), 88.0 (d,  $^1J_{\text{CF}} = 175.1$  Hz, C), 111.1 (CH), 120.8 (CH), 126.6 (C), 128.5 (CH), 129.4 (CH), 129.9 (CH), 130.6 (CH), 133.5 (C), 144.0 (C), 150.4 (d,  $^3J_{\text{CF}} = 2.3$  Hz, C), 157.5 (C).  $\delta_{\text{F}}$  ( $\text{CDCl}_3$ , 376 MHz) -142.3 (s).  $m/z$  (ESI) 377.1340 ( $\text{MH}^+$ ,  $\text{C}_{19}\text{H}_{22}\text{FN}_2\text{O}_3\text{S}$  requires 377.1335, 100 %).

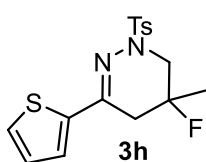

5-Fluoro-5-methyl-3-(thiophen-2-yl)-1-tosyl-1,4,5,6-tetrahydropyridazine **3h**

was obtained as an off-white solid (178 mg, 71 %) along with the by-product, 5-methyl-3-(thiophen-2-yl)-pyridazine (20 mg, 16 %). Crystals suitable for X-ray crystallography were grown by slow evaporation from a DCM and hexane (1:2) solution. Mp 150-154 °C.  $\delta_{\text{H}}$  ( $\text{CDCl}_3$ , 400 MHz) 1.55 (3H, d,  $^3J_{\text{HF}} = 20.3$  Hz,  $\text{CH}_3$ ), 2.40 (3H, s,  $\text{ArCH}_3$ ), 2.59 (1H, ddd,  $^3J_{\text{HF}} = 25.0$  Hz,  $^2J_{\text{HH}} = 18.3$  Hz,  $^4J_{\text{HH}} = 1.7$  Hz,  $\text{CHC}_\text{H}_\text{D}$ ), 2.84 (1H, t,  $^3J_{\text{HF}} = 25.0$  Hz,  $^2J_{\text{HH}} = 18.3$  Hz,  $\text{CHC}_\text{H}_\text{D}$ ), 3.18 (1H, dd,  $^3J_{\text{HF}} = 22.7$  Hz,  $^2J_{\text{HH}} = 11.7$  Hz,  $\text{NCH}_\text{A}\text{H}_\text{B}$ ), 3.69 (1H, ddd,  $^2J_{\text{HH}} = 11.7$  Hz,  $^3J_{\text{HF}} = 7.5$  Hz,  $^4J_{\text{HH}} = 2.1$  Hz,  $\text{NCH}_\text{A}\text{H}_\text{B}$ ), 6.98 (1H, dd,  $^3J_{\text{HH}} = 4.9$  Hz,  $^3J_{\text{HH}} = 3.7$  Hz,  $\text{ArH}$ ), 7.13 (1H, dd,  $^3J_{\text{HH}} = 3.7$  Hz,  $^4J_{\text{HH}} = 1.0$  Hz,  $\text{ArH}$ ), 7.27 - 7.35 (3H, m,  $\text{ArH}$ ), 7.85 (2H, d,  $^3J_{\text{HH}} = 8.2$  Hz,  $\text{ArH}$ ).  $\delta_{\text{H}\{\text{F}\}}$  ( $\text{CDCl}_3$ , 400 MHz) 1.55 (3H, s,  $\text{CH}_3$ ), 2.40 (3H, s,  $\text{ArCH}_3$ ), 2.59 (1H, dd,  $^2J_{\text{HH}} = 18.3$  Hz,  $^4J_{\text{HH}} = 1.7$  Hz,  $\text{CHC}_\text{H}_\text{D}$ ), 2.84 (1H, dd,  $^2J_{\text{HH}} = 18.3$  Hz,  $^4J_{\text{HH}} = 0.9$  Hz,  $\text{CHC}_\text{H}_\text{D}$ ), 3.18 (1H, d,  $^2J_{\text{HH}} = 11.7$  Hz,  $\text{NCH}_\text{A}\text{H}_\text{B}$ ), 3.69 (1H, dd,  $^2J_{\text{HH}} = 11.9$  Hz,  $^4J_{\text{HH}} = 2.0$  Hz,  $\text{NCH}_\text{A}\text{H}_\text{B}$ ), 6.98 (1H, dd,  $^3J_{\text{HH}} = 5.1$  Hz,  $^3J_{\text{HH}} = 3.7$  Hz), 7.13 (1H, dd,  $^3J_{\text{HH}} = 3.7$  Hz,  $^4J_{\text{HH}} = 1.0$  Hz,  $\text{ArH}$ ), 7.27 - 7.35 (3H, m,  $\text{ArH}$ ), 7.85 (2H, d,  $^3J_{\text{HH}} = 8.2$  Hz,  $\text{ArH}$ ).  $\delta_{\text{C}}$  ( $\text{CDCl}_3$ , 126 MHz) 21.6 ( $\text{CH}_3$ ), 24.8 (d,  $^2J_{\text{CF}} = 24.0$  Hz,  $\text{CH}_3$ ), 35.6 (d,  $^2J_{\text{CF}} = 25.6$  Hz,  $\text{CH}_2$ ), 50.7 (d,  $^2J_{\text{CF}} = 25.9$  Hz,  $\text{CH}_2$ ), 87.8 (d,  $^1J_{\text{CF}} = 176.6$  Hz, C), 125.7 (CH), 127.1 (CH), 128.0 (CH), 128.6 (CH), 129.5 (CH), 132.9 (C), 141.4 (C), 144.0 (d,  $^3J_{\text{CF}} = 2.3$  Hz, C).

Hz, C), 144.3 (C).  $\delta_F$  (CDCl<sub>3</sub>, 376 MHz) -142.3 (s).  $m/z$  (ESI) 353.0799 (MH<sup>+</sup>, C<sub>16</sub>H<sub>18</sub>FN<sub>2</sub>O<sub>2</sub>S<sub>2</sub> requires 353.0794, 100 %).

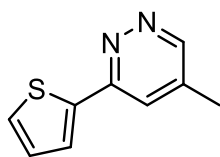

5-Methyl-3-(thiophen-2-yl)pyridazine was obtained as an orange solid (20 mg, 16 %). The characterisation data was in agreement with the literature.<sup>34</sup> Mp 119-120 °C (lit: 118-120 °C).<sup>34</sup>  $\delta_H$  (CDCl<sub>3</sub>, 400 MHz) 2.40 (3H, s, CH<sub>3</sub>), 7.16 (1H, dd, <sup>3</sup>J<sub>HH</sub> = 5.1 Hz, <sup>3</sup>J<sub>HH</sub> = 3.7 Hz, ArH), 7.49 (1H, dd, <sup>3</sup>J<sub>HH</sub> = 5.1 Hz, <sup>4</sup>J<sub>HH</sub> = 1.2 Hz, ArH), 7.58 (1H, d, <sup>4</sup>J<sub>HH</sub> = 1.0 Hz, ArH), 7.68 (1H, dd, <sup>3</sup>J<sub>HH</sub> = 3.7 Hz, <sup>4</sup>J<sub>HH</sub> = 1.2 Hz, ArH), 8.91 (1H, br s, ArH).  $\delta_C$  (CDCl<sub>3</sub>, 126 MHz) 18.5 (CH<sub>3</sub>), 122.5 (CH), 126.1 (CH), 128.0 (CH), 129.1 (CH), 137.9 (C), 140.7 (C), 151.5 (CH), 154.5 (C).  $m/z$  (ESI) 177.0491 (MH<sup>+</sup>, C<sub>9</sub>H<sub>9</sub>N<sub>2</sub>S requires 177.0486, 100 %).

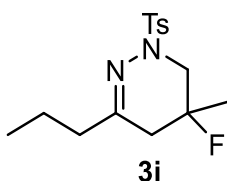

5-Fluoro-5-methyl-3-propyl-1-tosyl-1,4,5,6-tetrahydropyridazine **3i** was obtained as a white solid (180 mg, 81 %).

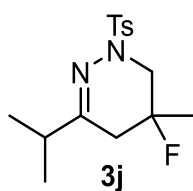

The general procedure was followed on a reduced scale; using **2j** (209 mg, 0.5 mmol), fluoroiodane (210 mg, 0.75 mmol), 4 Å powdered molecular sieves (130 mg) and dry HFIP (0.9 mL). 5-Fluoro-3-isopropyl-5-methyl-1-tosyl-1,4,5,6-tetrahydropyridazine **3j** was obtained as a white solid (122 mg, 78 %). Crystals

suitable for X-ray crystallography were grown by slow evaporation from a DCM and hexane (1:2) solution. Mp 110-112 °C.  $\delta_H$  (CDCl<sub>3</sub>, 400 MHz) 1.05 (3H, d, <sup>3</sup>J<sub>HH</sub> = 6.9 Hz, CH<sub>3</sub>), 1.05 (3H, d, <sup>3</sup>J<sub>HH</sub> = 6.9 Hz, CH<sub>3</sub>), 1.46 (3H, d, <sup>3</sup>J<sub>HF</sub> = 20.7 Hz, CH<sub>3</sub>), 2.13 (1H, ddd, <sup>3</sup>J<sub>HF</sub> = 24.5 Hz, <sup>2</sup>J<sub>HH</sub> = 18.4 Hz, <sup>4</sup>J<sub>HH</sub> = 1.5 Hz, CH<sub>C</sub>H<sub>D</sub>), 2.34 (1H, td, <sup>3</sup>J<sub>HF</sub> = <sup>2</sup>J<sub>HH</sub> = 18.4 Hz, <sup>4</sup>J<sub>HH</sub> = 1.0 Hz, CH<sub>C</sub>H<sub>D</sub>), 2.42 (3H, s, ArH), 2.43 (1H, sept, <sup>3</sup>J<sub>HH</sub> = 6.9 Hz, CH), 3.11 (1H, ddd, <sup>3</sup>J<sub>HF</sub> = 22.0 Hz, <sup>2</sup>J<sub>HH</sub> = 11.7 Hz, <sup>4</sup>J<sub>HH</sub> = 0.6 Hz, CH<sub>A</sub>H<sub>B</sub>), 3.46 (1H, ddd, <sup>2</sup>J<sub>HH</sub> = 11.7 Hz, <sup>3</sup>J<sub>HF</sub> = 8.7 Hz, <sup>4</sup>J<sub>HH</sub> = 1.8 Hz, CH<sub>A</sub>H<sub>B</sub>), 7.29 (2H, d, <sup>3</sup>J<sub>HH</sub> = 8.0 Hz, ArH), 7.78 (2H, d, <sup>3</sup>J<sub>HH</sub> = 8.3 Hz, ArH).  $\delta_{H\{F\}}$  (CDCl<sub>3</sub>, 400 MHz) 1.05 (3H, d, <sup>3</sup>J<sub>HH</sub> = 6.9 Hz, CH<sub>3</sub>), 1.05 (3H, d, <sup>3</sup>J<sub>HH</sub> = 6.9 Hz, CH<sub>3</sub>), 1.46 (3H, s, CH<sub>3</sub>), 2.13 (1H, dd, <sup>2</sup>J<sub>HH</sub> = 18.4 Hz, <sup>4</sup>J<sub>HH</sub> = 1.5 Hz, CH<sub>C</sub>H<sub>D</sub>), 2.34 (1H, dd, <sup>2</sup>J<sub>HH</sub> = 18.4 Hz, <sup>4</sup>J<sub>HH</sub> = 1.0 Hz, CH<sub>C</sub>H<sub>D</sub>), 2.42 (3H, s, ArH), 2.43 (1H, sept, <sup>3</sup>J<sub>HH</sub> = 6.9 Hz, CH), 3.11 (1H, dd, <sup>2</sup>J<sub>HH</sub> = 11.7, <sup>4</sup>J<sub>HH</sub> = 0.6 Hz, CH<sub>A</sub>H<sub>B</sub>), 3.46 (1H, dd, <sup>2</sup>J<sub>HH</sub> = 11.7, <sup>4</sup>J<sub>HH</sub> = 1.8 Hz, CH<sub>A</sub>H<sub>B</sub>), 7.29 (2H, d, <sup>3</sup>J<sub>HH</sub> = 8.0 Hz, ArH), 7.78 (2H, d, <sup>3</sup>J<sub>HH</sub> = 8.3 Hz, ArH).  $\delta_C$  (CDCl<sub>3</sub>, 101 MHz) 19.8 (CH<sub>3</sub>), 19.9 (CH<sub>3</sub>), 21.6 (CH<sub>3</sub>), 24.7 (d, <sup>2</sup>J<sub>CF</sub> = 24.4 Hz, CH<sub>3</sub>), 35.3 (d, <sup>2</sup>J<sub>CF</sub> = 25.2 Hz, CH<sub>2</sub>), 35.5 (CH), 50.9 (d, <sup>2</sup>J<sub>CF</sub> = 26.3 Hz, CH<sub>2</sub>), 88.2 (d, <sup>1</sup>J<sub>CF</sub> = 175.5 Hz, C), 128.6 (CH), 129.2 (CH), 132.8 (C), 144.0 (C), 157.5 (d, <sup>3</sup>J<sub>CF</sub> = 1.7 Hz, C).  $\delta_F$  (CDCl<sub>3</sub>, 376 MHz) -141.8 (s).  $m/z$  (ESI) 313.1387 (MH<sup>+</sup>, C<sub>15</sub>H<sub>22</sub>FN<sub>2</sub>O<sub>2</sub>S requires 313.1386, 100 %).

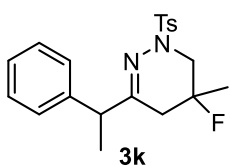

The general procedure was followed using (*E*)-4-methyl-*N'*-(5-methyl-2-phenylhex-5-en-3-ylidene)benzenesulfonylhydrazide **2k** (178 mg, 0.5 mmol) and 5-fluoro-5-methyl-3-(1-phenylethyl)-1-tosyl-1,4,5,6-tetrahydropyridazine **3k** (149 mg, 80 %) was formed as a mixture of two diastereomers (dr: 1:1) which

were separated by purification by column chromatography. *Data for diastereomer 1*: Mp 107-110 °C.  $\delta_{\text{H}}$  (CDCl<sub>3</sub>, 400 MHz) 1.32 (3H, d,  $^3J_{\text{HF}} = 20.7$  Hz, CH<sub>3</sub>), 1.41 (3H, d,  $^3J_{\text{HH}} = 7.1$  Hz, CH<sub>3</sub>), 1.93 (1H, dd,  $^3J_{\text{HF}} = 25.2$  Hz,  $^2J_{\text{HH}} = 17.5$  Hz, NCH<sub>A</sub>H<sub>B</sub>), 2.14 (1H, br t,  $^3J_{\text{HF}} = ^2J_{\text{HH}} = 17.7$  Hz, NCH<sub>A</sub>H<sub>B</sub>), 2.47 (3H, s, ArCH<sub>3</sub>), 3.01 (1H, dd,  $^3J_{\text{HF}} = 23.5$  Hz,  $^2J_{\text{HH}} = 11.6$  Hz, CH<sub>C</sub>H<sub>D</sub>), 3.50 (1H, q,  $^3J_{\text{HH}} = 7.1$  Hz, CH(CH<sub>3</sub>)), 3.58 (1H, ddd,  $^2J_{\text{HH}} = 11.7$  Hz,  $^3J_{\text{HF}} = 8.0$  Hz,  $^4J_{\text{HH}} = 2.0$  Hz, CH<sub>C</sub>H<sub>D</sub>), 6.99 (2H, dd,  $^3J_{\text{HH}} = 7.2$  Hz,  $^4J_{\text{HH}} = 2.3$  Hz, ArH), 7.18 - 7.25 (3H, m, ArH), 7.34 (2H, d,  $^3J_{\text{HH}} = 8.3$  Hz, ArH), 7.83 (2H, d,  $^3J_{\text{HH}} = 8.3$  Hz, ArH).  $\delta_{\text{H}\{\text{F}\}}$  (CDCl<sub>3</sub>, 400 MHz) 1.32 (3H, s, CH<sub>3</sub>), 1.41 (3H, d,  $^3J_{\text{HH}} = 7.1$  Hz, CH<sub>3</sub>), 1.93 (1H, d,  $^2J_{\text{HH}} = 18.5$  Hz, NCH<sub>A</sub>H<sub>B</sub>), 2.14 (1H, d,  $^2J_{\text{HH}} = 18.2$  Hz, NCH<sub>A</sub>H<sub>B</sub>), 2.47 (3H, s, ArCH<sub>3</sub>), 3.01 (1H, dd,  $^2J_{\text{HH}} = 11.9$  Hz, CH<sub>C</sub>H<sub>D</sub>), 3.50 (1H, q,  $^3J_{\text{HH}} = 7.1$  Hz, CH(CH<sub>3</sub>)), 3.58 (1H, dd,  $^2J_{\text{HH}} = 11.8$  Hz,  $^4J_{\text{HH}} = 2.0$  Hz, CH<sub>C</sub>H<sub>D</sub>), 6.99 (2H, dd,  $^3J_{\text{HH}} = 7.2$  Hz,  $^4J_{\text{HH}} = 2.3$  Hz, ArH), 7.18 - 7.25 (3H, m, ArH), 7.34 (2H, d,  $^3J_{\text{HH}} = 8.3$  Hz, ArH), 7.83 (2H, d,  $^3J_{\text{HH}} = 8.3$  Hz, ArH).  $\delta_{\text{C}}$  (CDCl<sub>3</sub>, 101 MHz) 18.6 (CH<sub>3</sub>), 21.6 (CH<sub>3</sub>), 24.4 (d,  $^2J_{\text{CF}} = 24.4$  Hz, CH<sub>3</sub>), 36.2 (d,  $^2J_{\text{CF}} = 25.0$  Hz, CH<sub>2</sub>), 47.0 (CH), 50.8 (d,  $^2J_{\text{CF}} = 25.7$  Hz, CH<sub>2</sub>), 87.9 (d,  $^1J_{\text{CF}} = 175.7$  Hz, C), 127.0 (CH), 127.4 (CH), 128.7 (CH), 128.7 (CH), 129.4 (CH), 132.9 (C), 142.3 (C), 144.1 (C), 154.8 (d,  $^3J_{\text{CF}} = 1.7$  Hz, C).  $\delta_{\text{F}}$  (CDCl<sub>3</sub>, 376 MHz) -142.60 (s). m/z (ESI) 375.1541 (MH<sup>+</sup>, C<sub>20</sub>H<sub>24</sub>FN<sub>2</sub>O<sub>2</sub>S requires 375.1543, 100 %).

*Data for diastereomer 2*: Mp 144-145 °C.  $\delta_{\text{H}}$  (CDCl<sub>3</sub>, 400 MHz) 1.36 (3H, d,  $^3J_{\text{HF}} = 20.6$  Hz, CH<sub>3</sub>), 1.41 (3H, d,  $^3J_{\text{HH}} = 7.1$  Hz, CH<sub>3</sub>), 1.91 (1H, dd,  $^3J_{\text{HF}} = 25.5$  Hz,  $^2J_{\text{HH}} = 18.3$  Hz, NCH<sub>A</sub>H<sub>B</sub>), 2.18 (1H, br t,  $^3J_{\text{HF}} = ^2J_{\text{HH}} = 18.1$  Hz, NCH<sub>A</sub>H<sub>B</sub>), 2.47 (3H, s, ArCH<sub>3</sub>), 3.05 (1H, dd,  $^3J_{\text{HF}} = 23.5$  Hz,  $^2J_{\text{HH}} = 11.6$  Hz, CH<sub>C</sub>H<sub>D</sub>), 3.47 - 3.61 (2H, m, CH(CH<sub>3</sub>) and CH<sub>C</sub>H<sub>D</sub>), 6.99 (2H, dd,  $^3J_{\text{HH}} = 7.2$  Hz,  $^4J_{\text{HH}} = 2.3$  Hz, ArH), 7.16 - 7.23 (3H, m, ArH), 7.34 (2H, d,  $^3J_{\text{HH}} = 8.2$  Hz, ArH), 7.83 (2H, d,  $^3J_{\text{HH}} = 8.2$  Hz, ArH).  $\delta_{\text{H}\{\text{F}\}}$  (CDCl<sub>3</sub>, 400 MHz) 1.36 (3H, s, CH<sub>3</sub>), 1.41 (3H, d,  $^3J_{\text{HH}} = 7.1$  Hz, CH<sub>3</sub>), 1.91 (1H, d,  $^2J_{\text{HH}} = 18.3$  Hz, NCH<sub>A</sub>H<sub>B</sub>), 2.18 (1H, d,  $^2J_{\text{HH}} = 18.3$  Hz, NCH<sub>A</sub>H<sub>B</sub>), 2.47 (3H, s, ArCH<sub>3</sub>), 3.05 (1H, d,  $^2J_{\text{HH}} = 11.8$  Hz, CH<sub>C</sub>H<sub>D</sub>), 3.47 - 3.61 (2H, m, CH(CH<sub>3</sub>) and CH<sub>C</sub>H<sub>D</sub>), 6.99 (2H, dd,  $^3J_{\text{HH}} = 7.2$  Hz,  $^4J_{\text{HH}} = 2.3$  Hz, ArH), 7.16 - 7.23 (3H, m, ArH), 7.34 (2H, d,  $^3J_{\text{HH}} = 8.2$  Hz, ArH), 7.83 (2H, d,  $^3J_{\text{HH}} = 8.2$  Hz, ArH).  $\delta_{\text{C}}$  (CDCl<sub>3</sub>, 101 MHz) 18.6 (CH<sub>3</sub>), 21.6 (CH<sub>3</sub>), 24.5 (d,  $^2J_{\text{CF}} = 24.2$  Hz, CH<sub>3</sub>), 35.8 (d,  $^2J_{\text{CF}} = 25.6$  Hz, CH<sub>2</sub>), 46.7 (CH), 50.8 (d,  $^2J_{\text{CF}} = 25.9$  Hz, CH<sub>2</sub>), 87.8 (d,  $^1J_{\text{CF}} = 175.9$  Hz, C), 126.9 (CH), 127.4 (CH), 128.65 (CH), 128.67 (CH), 129.3 (CH), 132.9 (C), 142.1 (C), 144.1 (C), 154.9 (C, d,  $^3J_{\text{CF}} = 1.7$  Hz).  $\delta_{\text{F}}$  (CDCl<sub>3</sub>, 376 MHz) -142.7 (s). m/z (ESI) 375.1542 (MH<sup>+</sup>, C<sub>20</sub>H<sub>24</sub>FN<sub>2</sub>O<sub>2</sub>S requires 375.1543, 100 %).

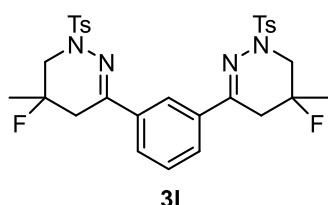

The general procedure was followed using *N,N'*-((1*E*,1'*E*)-1,3-phenylenebis(3-methylbut-3-en-1-yl-1-ylidene))bis(4-methylbenzenesulfonohydrazide) **21** (145 mg, 0.25 mmol) and 1,3-bis(5-fluoro-5-methyl-1-tosyl-1,4,5,6-tetrahydropyridazin-3-yl)benzene **31** (71 mg, 46 %) was formed as a mixture of two diastereomers (dr: 1:1) which were

inseparable by purification by column chromatography. Mp 177-178 °C.  $\delta_{\text{H}}$  (CDCl<sub>3</sub>, 400 MHz) 1.59 (6H, d,  $^3J_{\text{HF}} = 20.5$  Hz, CH<sub>3</sub>), 2.39 (6H, s, ArCH<sub>3</sub>), 2.57 (2H, dd,  $^3J_{\text{HF}} = 26.5$  Hz,  $^2J_{\text{HH}} = 18.4$  Hz, CH<sub>C</sub>H<sub>D</sub>), 2.86 (2H, br t,  $^3J_{\text{HF}} = ^2J_{\text{HH}} = 18.2$  Hz, CH<sub>C</sub>H<sub>D</sub>), 3.22 (2H, dd,  $^3J_{\text{HF}} = 23.5$  Hz,  $^2J_{\text{HH}} = 11.0$  Hz, NCH<sub>A</sub>H<sub>B</sub> diastereomer1), 3.25 (2H, dd,  $^3J_{\text{HF}} = 23.5$  Hz,  $^2J_{\text{HH}} = 11.0$  Hz, NCH<sub>A</sub>H<sub>B</sub> diastereomer2), 3.79 (2H, dd,  $^2J_{\text{HH}} = 12.0$  Hz,  $^3J_{\text{HF}} = 7.9$  Hz, NCH<sub>A</sub>H<sub>B</sub> diastereomer1), 3.80 (2H, dd,  $^2J_{\text{HH}} = 12.0$  Hz,  $^3J_{\text{HF}} = 7.9$  Hz, NCH<sub>A</sub>H<sub>B</sub> diastereomer2), 7.29 - 7.39 (5H, m, ArH), 7.62 (2H, dt,  $^3J_{\text{HH}} = 7.8$  Hz,  $^4J_{\text{HH}} = 2.0$  Hz, ArH), 7.87 (4H, dd,  $^3J_{\text{HH}} = 8.4$  Hz,  $^4J_{\text{HH}} = 2.0$  Hz, ArH), 8.05 (1H, d,  $^3J_{\text{HH}} = 5.4$  Hz, ArH).  $\delta_{\text{H}\{\text{F}\}}$  (CDCl<sub>3</sub>, 400 MHz) 1.59 (6H, s, CH<sub>3</sub>), 2.39 (6H, s, ArCH<sub>3</sub>), 2.59 (2H, br d,  $^2J_{\text{HH}} = 18.4$  Hz, CH<sub>C</sub>H<sub>D</sub>), 2.86 (2H, br d,  $^2J_{\text{HH}} = 18.4$  Hz, CH<sub>C</sub>H<sub>D</sub>), 3.22 (2H, d,  $^2J_{\text{HH}} = 11.0$  Hz, NCH<sub>A</sub>H<sub>B</sub> diastereomer1), 3.25 (2H, d,  $^2J_{\text{HH}} = 11.0$  Hz, NCH<sub>A</sub>H<sub>B</sub> diastereomer2), 3.79 (2H, dd,  $^2J_{\text{HH}} = 11.8$  Hz,  $^4J_{\text{HH}} = 1.7$  Hz, NCH<sub>A</sub>H<sub>B</sub> diastereomer1), 3.80 (2H, dd,  $^2J_{\text{HH}} = 11.8$  Hz,  $^4J_{\text{HH}} = 1.7$  Hz, NCH<sub>A</sub>H<sub>B</sub> diastereomer2), 7.33 (5H, m, ArH), 7.62 (2H, d,  $^3J_{\text{HH}} = 7.8$  Hz, ArH), 7.87 (4H, dd,  $^3J_{\text{HH}} = 8.3$  Hz,  $^4J_{\text{HH}} = 1.9$  Hz, ), 8.04 (1H, d,  $^4J_{\text{HH}} = 1.7$  Hz).  $\delta_{\text{C}}$  (CDCl<sub>3</sub>, 101 MHz) 21.6 (CH<sub>3</sub>), 24.9 (d,  $^2J_{\text{CF}} = 24.0$  Hz, CH<sub>3</sub>), 35.1 (d,  $^2J_{\text{CF}} = 24.2$  Hz, CH<sub>2</sub>), 50.4 (d,  $^2J_{\text{CF}} = 25.6$  Hz, CH<sub>2</sub>), 87.8 (d,  $^1J_{\text{CF}} = 175.9$  Hz, C), 122.6 (CH), 126.6 (CH), 128.4 (CH), 128.6 (CH), 129.7 (d,  $^5J_{\text{CF}} = 1.1$  Hz, CH), 133.2 (C), 136.2 (C), 144.4 (C), 146.4 (C).  $\delta_{\text{F}}$  (CDCl<sub>3</sub>, 376 MHz) -141.86 (s), -141.90 (s). m/z (ESI) 615.1910 (MH<sup>+</sup>, C<sub>30</sub>H<sub>33</sub>F<sub>2</sub>N<sub>4</sub>O<sub>4</sub>S<sub>2</sub> requires 615.1911, 100 %).

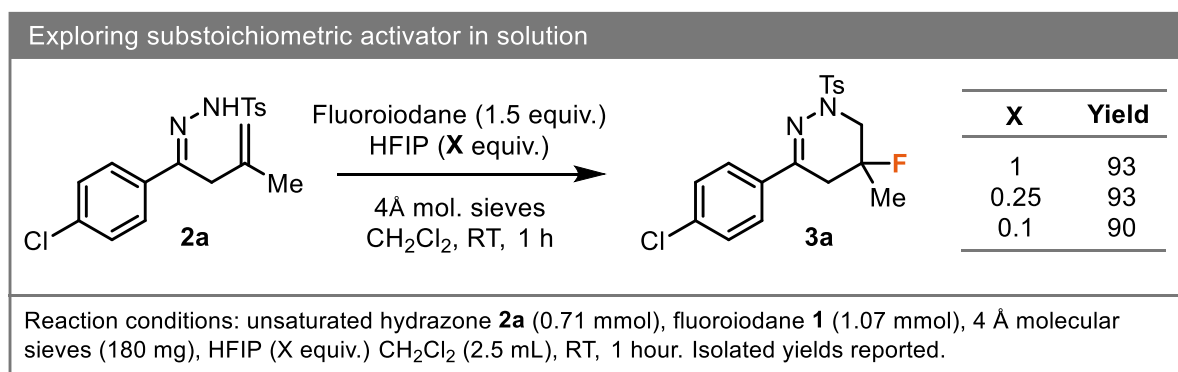

Scheme S1. Substoichiometric HFIP studies.

**Table S3:** Mechanochemical optimisation for fluorocyclisation of unsaturated hydrazone **2c** with fluoroiodane **1**

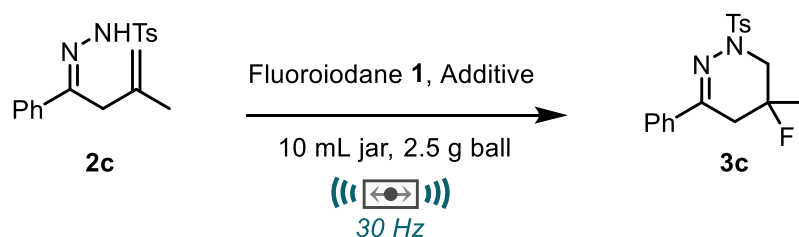

| Entry | F-iodane equiv. | Time (min) | Additive        | Yield <b>3c</b> <sup>a</sup> |
|-------|-----------------|------------|-----------------|------------------------------|
| 1     | 1.5             | 15         | No additive     | 52                           |
| 2     | 1.5             | 15         | HFIP (1 equiv.) | 72                           |
| 3     | 1.5             | 15         | HFIP (2 equiv.) | 92 (91) <sup>b</sup>         |
| 4     | 1.5             | 15         | HFIP (3 equiv.) | 90                           |
| 5     | 1.5             | 15         | HFIP (4 equiv.) | 90                           |
| 6     | 1.5             | 15         | HFIP (5 equiv.) | 91                           |
| 7     | 1.5             | 5          | HFIP (2 equiv.) | 73                           |
| 8     | 1.5             | 10         | HFIP (2 equiv.) | 87                           |
| 9     | 1.25            | 15         | HFIP (1 equiv.) | 72                           |
| 10    | 1.75            | 15         | HFIP (3 equiv.) | 91                           |

<sup>a</sup> Yield determined by <sup>19</sup>F NMR spectroscopy using benzotrifluoride (10  $\mu$ L, 0.083 mmol) as an internal standard. <sup>b</sup> Isolated yield

### General Procedure C for fluorocyclisations of unsaturated tosyl hydrazones **2** using fluoroiodane in a ball-mill (Scheme 2)

To a 10 mL stainless steel jar (Retsch) was added a 2.5 g stainless steel milling ball. Unsaturated hydrazone (0.25 mmol), fluoroiodane **1** (0.1050 g, 0.375 mmol) and 1,1,1,3,3,3-hexafluoro-2-propanol (52  $\mu$ L, 0.5 mmol) were added under an air atmosphere. The milling jar was then screwed closed and milled at 30 Hz for 15 minutes. After the desired reaction, the mixture was transferred to a flask with CHCl<sub>3</sub> (~2-5 mL). The crude NMR yield was determined by adding benzotrifluoride (10  $\mu$ L, 0.083 mmol) as an internal standard. The crude product was concentrated under reduced pressure and purified by flash column chromatography using petroleum ether : ethyl acetate (4:1). Fluorinated tetrahydropyridazines **3b**, **3c**, **3d**, **3e**, **3k** and **3l** were prepared using this procedure.

#### *N*-(6-(4-Chlorophenyl)-4-methyl-2-tosyl-2,3,4,5-tetrahydropyridazin-4-yl)acetamide **4**

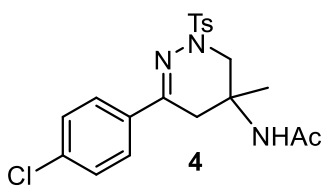

During optimisation (Table 1: entry 6), a Schlenk flask was charged with **2a** (258 mg, 0.71 mmol), fluoroiodane (300 mg, 1.07 mmol), 4 Å powdered molecular sieves (180 mg) in dry MeCN (2.5 mL) under an inert atmosphere. The reaction mixture was stirred for 1 hour at 40 °C before being concentrated *in vacuo* and the crude product was purified by column chromatography using petroleum ether : ethyl acetate (4:1). 3-(4-Chlorophenyl)-5-fluoro-5-methyl-1-tosyl-1,4,5,6-tetrahydropyridazine **3a** was obtained as a white solid (89 mg, 31 %). The Ritter product *N*-(6-(4-chlorophenyl)-4-methyl-2-tosyl-2,3,4,5-tetrahydropyridazin-4-yl)acetamide **4** was obtained as a white solid (62 mg, 23 %). Mp 225-227 °C.  $\delta_{\text{H}}$  (CDCl<sub>3</sub>, 400 MHz) 1.55 (3H, s, CH<sub>3</sub>), 1.92 (3H, s, CH<sub>3</sub>), 2.23 (1H, d,  $^2J_{\text{HH}} = 18.8$  Hz, CH<sub>C</sub>H<sub>D</sub>), 2.41 (3H, s, ArCH<sub>3</sub>), 2.64 (1H, d,  $^2J_{\text{HH}} = 11.3$  Hz, NCH<sub>A</sub>H<sub>B</sub>), 3.58 (1H, dd,  $^2J_{\text{HH}} = 18.8$  Hz,  $^4J_{\text{HH}} = 0.8$  Hz, CH<sub>C</sub>H<sub>D</sub>), 3.94 (1H, dd,  $^2J_{\text{HH}} = 11.3$  Hz,  $^4J_{\text{HH}} = 2.0$  Hz, NCH<sub>A</sub>H<sub>B</sub>), 5.79 (1H, s, NH), 7.29 - 7.35 (4H, m, ArH), 7.64 (2H, d,  $^3J_{\text{HH}} = 8.8$  Hz, ArH), 7.81 (2H,  $^3J_{\text{HH}} = 8.4$  Hz, ArH).  $\delta_{\text{C}}$  (CDCl<sub>3</sub>, 126 MHz) 21.6 (CH<sub>3</sub>), 24.3 (CH<sub>3</sub>), 24.7 (CH<sub>3</sub>), 33.2 (CH<sub>2</sub>), 48.7 (C), 51.7 (CH<sub>2</sub>), 126.9 (CH), 128.4 (CH), 128.6 (CH), 129.8 (CH), 132.4 (C), 134.6 (C), 135.9 (C), 144.7 (C), 149.2 (C), 170.4 (CO). *m/z* (ESI) 420.1144 (MH<sup>+</sup>, C<sub>20</sub>H<sub>23</sub><sup>35</sup>ClN<sub>3</sub>O<sub>3</sub>S requires 420.1149, 100 %), 422.1124 (MH<sup>+</sup>, C<sub>20</sub>H<sub>23</sub><sup>37</sup>ClN<sub>3</sub>O<sub>3</sub>S requires 422.1119, 40 %).

#### General Procedure for preparation of unsaturated oximes **6**<sup>35</sup>

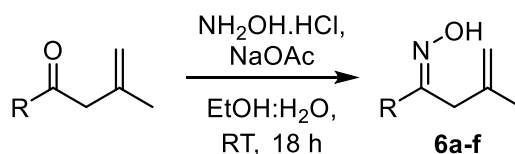

A flask was charged with unsaturated ketone (10 mmol), hydroxylamine hydrochloride (50 mmol) and sodium acetate (70 mmol) in a water: ethanol mixture (1:1, 100 mL) at room temperature. The reaction mixture was stirred overnight for 18-24 hours under an inert atmosphere. The reaction mixture was concentrated *in vacuo* and was then extracted into DCM (3 x 30 mL). The combined organic layer was washed with water (2 x 50 mL) and brine (3 x 50 mL), dried over MgSO<sub>4</sub> and concentrated *in vacuo*. The crude product was purified by column chromatography using petroleum ether : ethyl acetate (5:1) to yield the pure unsaturated oxime.

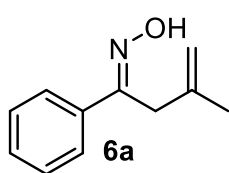

The general procedure was followed using 3-methyl-1-phenylbut-3-en-1-one (1.40 g, 8.72 mmol), hydroxylamine hydrochloride (3.00 g, 43.6 mmol) and sodium acetate (5.00 g, 61.2 mmol) in an ethanol : water mixture (1:1, 100 mL). (*E*)-3-methyl-1-phenylbut-3-en-1-one oxime **6a** was obtained as an off-white

solid (0.94 g, 62 %). Additionally, the minor regioisomer, (*Z*)-3-methyl-1-phenylbut-3-en-1-one oxime, was isolated as a yellow oil (0.09 g, 6 %). The characterisation data was in agreement with the literature.<sup>36</sup> Mp 48-52 °C (lit.,<sup>36</sup> 41-43 °C).  $\delta_{\text{H}}$  (CDCl<sub>3</sub>, 400 MHz) 1.84 (3H, s, CH<sub>3</sub>), 3.58 (2H, s, CH<sub>2</sub>), 4.78 (1H, s, =CH<sub>2</sub>), 4.86 (1H, s, =CH<sub>2</sub>), 7.35 - 7.45 (3H, m, ArH), 7.61 - 7.71 (2H, m, ArH), 8.86 (1H, br s, OH).  $\delta_{\text{C}}$  (CDCl<sub>3</sub>, 101 MHz) 23.1 (CH<sub>3</sub>), 34.3 (CH<sub>2</sub>), 112.2 (CH<sub>2</sub>), 126.4 (CH), 128.5 (CH), 129.3 (CH), 135.8 (C), 140.3 (C), 157.0 (C). *m/z* (ASAP) 176.1077 (MH<sup>+</sup>, C<sub>11</sub>H<sub>14</sub>NO requires 176.1075, 95 %), 158.0979 ((M-OH)<sup>+</sup>, 100 %).

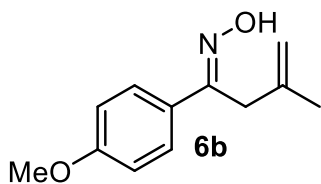

The general procedure was followed using 3-methyl-1-(4-methoxyphenyl)-but-3-en-1-one (2.52 g, 13.2 mmol), hydroxylamine hydrochloride (4.60 g, 66.2 mmol) and sodium acetate (7.60 g, 92.7 mmol) in an ethanol : water mixture (1:1, 150 mL). (*E*)-1-(4-Methoxyphenyl)-3-methylbut-3-en-1-one oxime **6b** was obtained as a white solid (1.58 g, 73 %) and the characterisation data was in agreement with the literature.<sup>36</sup> Mp 81-84 °C (lit.,<sup>36</sup> 84-85 °C).  $\delta_{\text{H}}$  (CDCl<sub>3</sub>, 400 MHz) 1.81 (3H, s, CH<sub>3</sub>), 3.52 (2H, s, CH<sub>2</sub>), 3.82 (3H, s, OCH<sub>3</sub>), 4.73 (1H, s, =CH<sub>2</sub>), 4.83 (1H, s, =CH<sub>2</sub>), 6.89 (2H, d, <sup>3</sup>*J*<sub>HH</sub> = 9.0 Hz, ArH), 7.59 (2H, d, <sup>3</sup>*J*<sub>HH</sub> = 9.0 Hz, ArH), 7.84 (1H, s, OH).  $\delta_{\text{C}}$  (CDCl<sub>3</sub>, 126 MHz) 23.1 (CH<sub>3</sub>), 34.1 (CH<sub>2</sub>), 55.3 (CH<sub>3</sub>), 112.1 (CH<sub>2</sub>), 113.8 (CH), 127.7 (CH), 128.3 (C), 140.6 (C), 156.6 (C), 160.5 (C). *m/z* (ESI) 206.1179 (MH<sup>+</sup>, C<sub>12</sub>H<sub>16</sub>NO<sub>2</sub> requires 206.1181, 100 %).

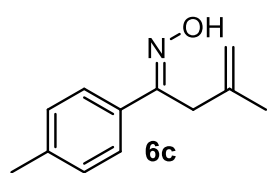

The general procedure was followed using 3-methyl-1-(4-methylphenyl)-but-3-en-1-one (2.05 g, 11.5 mmol), hydroxylamine hydrochloride (3.99 g, 57.4 mmol) and sodium acetate (6.60 g, 80.0 mmol) in an ethanol : water mixture (1:1, 120 mL). (*E*)-3-methyl-1-(*p*-tolyl)but-3-en-1-one oxime **6c** was obtained as colourless crystals/ white solid (1.45 g, 63 %). Additionally, the minor regioisomer, (*Z*)-3-methyl-1-(*p*-tolyl)but-3-en-1-one oxime, was isolated as a white solid (0.09 g, 4 %). Mp 60-62 °C.  $\delta_{\text{H}}$  (CDCl<sub>3</sub>, 400 MHz) 1.80 (3H, s, CH<sub>3</sub>), 2.35 (3H, s, ArCH<sub>3</sub>), 3.54 (2H, s, CH<sub>2</sub>), 4.74 (1H, s, =CH<sub>2</sub>), 4.82 (1H, s, =CH<sub>2</sub>), 7.16 (2H, d, <sup>3</sup>*J*<sub>HH</sub> = 8.0 Hz, ArH), 7.52 (2H, d, <sup>3</sup>*J*<sub>HH</sub> = 8.0 Hz, ArH), 9.23 (1H, br s, OH).  $\delta_{\text{C}}$  (CDCl<sub>3</sub>, 126 MHz) 21.3 (CH<sub>3</sub>), 23.1 (CH<sub>3</sub>), 34.3 (CH<sub>2</sub>), 112.2 (CH<sub>2</sub>), 126.2 (CH), 129.2 (CH), 133.0 (C), 139.3 (C), 140.5 (C), 156.8 (C). *m/z* (ASAP) 190.1239 (MH<sup>+</sup>, C<sub>12</sub>H<sub>16</sub>NO requires 190.1232, 100 %).

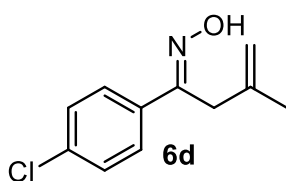

The general procedure was followed using 3-methyl-1-(4-chlorophenyl)-but-3-en-1-one (2.65 g, 13.6 mmol), hydroxylamine hydrochloride (4.73 g, 68.1 mmol) and sodium acetate (7.82 g, 95.3 mmol) in an ethanol : water mixture (1:1, 150 mL). (*E*)-1-(4-Chlorophenyl)-3-methylbut-3-en-1-one

oxime **6d** was obtained as colourless crystals/ white solid (1.71 g, 60 %). Additionally, the minor regioisomer, (*Z*)-1-(4-chlorophenyl)-3-methylbut-3-en-1-one oxime, was isolated as a white solid (0.42 g, 15 %). Mp 79-81 °C.  $\delta_{\text{H}}$  (CDCl<sub>3</sub>, 400 MHz) 1.80 (3H, s, CH<sub>3</sub>), 3.52 (2H, s, CH<sub>2</sub>), 4.71 (1H, s, =CH<sub>2</sub>), 4.83 (1H, s, =CH<sub>2</sub>), 7.33 (2H, d, <sup>3</sup>J<sub>HH</sub> = 8.8 Hz, ArH), 7.57 (2H, d, <sup>3</sup>J<sub>HH</sub> = 8.8 Hz, ArH), 8.54 (1H, br s, OH).  $\delta_{\text{C}}$  (CDCl<sub>3</sub>, 126 MHz) 23.0 (CH<sub>3</sub>), 34.1 (CH<sub>2</sub>), 112.4 (CH<sub>2</sub>), 127.6 (CH), 128.7 (CH), 134.2 (C), 135.3 (C), 140.1 (C), 156.1 (C). m/z (ASAP) 210.0681 (MH<sup>+</sup>, C<sub>11</sub>H<sub>13</sub>NO<sup>35</sup>Cl requires 210.0686, 100 %), 212.0657 (MH<sup>+</sup>, C<sub>11</sub>H<sub>13</sub>NO<sup>37</sup>Cl requires 212.0656, 33 %).

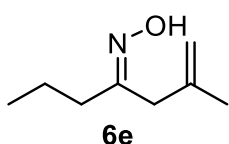

The general procedure was followed using 2-methylhept-1-en-4-one (1.25 g, 9.9 mmol), hydroxylamine hydrochloride (3.44 g, 49.5 mmol) and sodium acetate (5.69 g, 69.3 mmol) in an ethanol : water mixture (1:1, 100 mL). (*Z*)-2-

methylhept-1-en-4-one oxime **6e** was obtained as a mixture of isomers as a colourless oil (0.99 g, 71 % (47:53 mixture of (*Z*)- & (*E*)-isomers). Minor (*Z*)-isomer:  $\delta_{\text{H}}$  (CDCl<sub>3</sub>, 400 MHz) 0.92 (3H, t, <sup>3</sup>J<sub>HH</sub> = 7.4 Hz, CH<sub>3</sub>), 1.48 - 1.60 (2H, m, CH<sub>2</sub>), 1.75 (3H, s, CH<sub>3</sub>), 2.15 (2H, t, <sup>3</sup>J<sub>HH</sub> = 7.4 Hz, CH<sub>2</sub>), 3.11 (2H, s, CH<sub>2</sub>), 4.74 (1H, s, =CH<sub>2</sub>), 4.83 (1H, s, =CH<sub>2</sub>), 8.46 (1H, br s, OH).  $\delta_{\text{C}}$  (CDCl<sub>3</sub>, 126 MHz) 13.8 (CH<sub>3</sub>), 19.6 (CH<sub>2</sub>), 22.8 (CH<sub>3</sub>), 35.5 (CH<sub>2</sub>), 35.7 (CH<sub>2</sub>), 112.6 (CH<sub>2</sub>), 141.4 (C), 160.1 (C). m/z (ASAP) 142.1232 (MH<sup>+</sup>, C<sub>8</sub>H<sub>16</sub>NO requires 142.1232, 100 %).

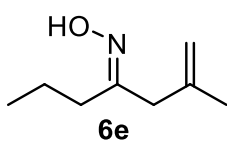

Major (*E*)-isomer:  $\delta_{\text{H}}$  (CDCl<sub>3</sub>, 400 MHz) 0.95 (3H, t, <sup>3</sup>J<sub>HH</sub> = 7.4 Hz, CH<sub>3</sub>), 1.48 - 1.60 (2H, m, CH<sub>2</sub>), 1.71 (3H, s, CH<sub>3</sub>), 2.31 (2H, t, <sup>3</sup>J<sub>HH</sub> = 7.8 Hz, CH<sub>2</sub>), 2.87 (2H, s, CH<sub>2</sub>), 4.81 (1H, s, =CH<sub>2</sub>), 4.87 (1H, s, =CH<sub>2</sub>), 8.46 (1H, br s, OH).  $\delta_{\text{C}}$  (CDCl<sub>3</sub>,

126 MHz) 14.3 (CH<sub>3</sub>), 19.0 (CH<sub>2</sub>), 22.1 (CH<sub>3</sub>), 28.9 (CH<sub>2</sub>), 42.7 (CH<sub>2</sub>), 113.6 (CH<sub>2</sub>), 140.5 (C), 159.0 (C). m/z (ASAP) 142.1232 (MH<sup>+</sup>, C<sub>8</sub>H<sub>16</sub>NO requires 142.1232, 100 %).

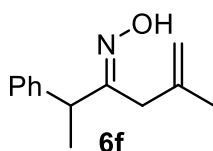

The general procedure was followed using 5-methyl-2-phenylhex-5-en-3-one (0.88 g, 4.7 mmol), hydroxylamine hydrochloride (1.62 g, 23.2 mmol) and sodium acetate (2.67 g, 32.5 mmol) in an ethanol : water mixture (1:1, 50 mL). (*E*)-5-Methyl-2-phenylhex-5-en-3-one oxime **6f** was obtained as a white solid

(774 mg, 82 %). Mp 67-68 °C.  $\delta_{\text{H}}$  (CDCl<sub>3</sub>, 400 MHz) 1.43 (3H, d, <sup>3</sup>J<sub>HH</sub> = 7.2 Hz, CH(CH<sub>3</sub>)), 1.71 (3H, s, CH<sub>3</sub>), 2.54 (1H, d, <sup>2</sup>J<sub>HH</sub> = 14.5 Hz, CH<sub>A</sub>H<sub>B</sub>), 3.39 (1H, d, <sup>2</sup>J<sub>HH</sub> = 14.5 Hz, CH<sub>A</sub>H<sub>B</sub>), 3.66 (1H, q, <sup>3</sup>J<sub>HH</sub> = 7.2 Hz, CH(CH<sub>3</sub>)), 4.68 (1H, s, =CH<sub>2</sub>), 4.82 (1H, s, =CH<sub>2</sub>), 7.21 - 7.27 (3H, m, ArH), 7.27 -



7.34 (2H, m, ArH), 8.57 (1H, br s, OH).  $\delta_C$  (CDCl<sub>3</sub>, 101 MHz) 19.2 (CH<sub>3</sub>), 22.8 (CH<sub>3</sub>), 35.1 (CH<sub>2</sub>), 44.1 (CH), 112.5 (CH<sub>2</sub>), 126.8 (CH), 127.8 (CH), 128.6 (CH), 140.6 (C), 142.9 (C), 160.9 (C). m/z (ESI) 204.1388 (MH<sup>+</sup>, C<sub>13</sub>H<sub>18</sub>NO requires 204.1388, 100 %).

**Table S4** Optimisation of intramolecular fluorocyclisation of unsaturated oxime **6a**<sup>a</sup>

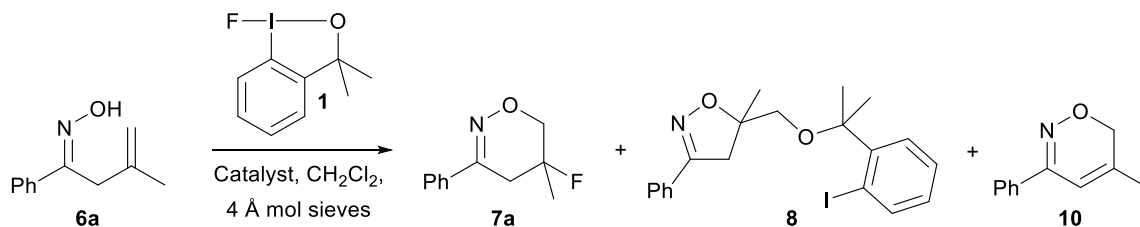

| Entry          | Catalyst<br>(Equiv)                     | Temp<br>(°C) | Time<br>(h) | Conv <sup>n</sup><br>(%) | 7a <sup>c</sup><br>(%) | 8 <sup>c</sup><br>(%) | 10 <sup>c</sup><br>(%) |              |
|----------------|-----------------------------------------|--------------|-------------|--------------------------|------------------------|-----------------------|------------------------|--------------|
| 1              | AgBF <sub>4</sub>                       | 1            | 40          | 20                       | >95                    | trace                 | 15                     | 20           |
| 2              | AgBF <sub>4</sub>                       | 0.2          | 40          | 20                       | >95                    | trace                 | 10                     | 20           |
| 3              | AgBF <sub>4</sub>                       | 0.2          | 40          | 4                        | >95                    | 28                    | 10                     | 15           |
| 4              | AgBF <sub>4</sub>                       | 0.2          | 40          | 1                        | >95                    | 45                    | 10                     | <5           |
| 5              | No catalyst                             | 0            | 40          | 1                        | >95                    | trace                 | 0                      | -            |
| 6              | AgBF <sub>4</sub>                       | 0.2          | RT          | 1                        | >95                    | 46                    | 10                     | <5           |
| 7 <sup>d</sup> | AgBF <sub>4</sub>                       | 0.2          | RT          | 1                        | >95                    | 29                    | 10                     | <5           |
| 8              | [Cu(MeCN) <sub>4</sub> ]BF <sub>4</sub> | 0.2          | RT          | 1                        | >95                    | 23                    | 10                     | <5           |
| 9              | ZnBF <sub>4</sub> ·H <sub>2</sub> O     | 0.2          | RT          | 1                        | >95                    | 0                     | 10                     | 23           |
| <b>10</b>      | <b>AgBF<sub>4</sub></b>                 | <b>1</b>     | <b>RT</b>   | <b>0.25</b>              | <b>&gt;95</b>          | <b>46</b>             | <b>15</b>              | <b>&lt;5</b> |
| 11             | AgBF <sub>4</sub>                       | 0.2          | RT          | 0.25                     | 86                     | 21                    | 10                     | <5           |

<sup>a</sup> Reaction conditions: unsaturated oxime **6a** (0.71 mmol), fluoriodane **1** (1.07 mmol), 4 Å molecular sieves (180 mg), CH<sub>2</sub>Cl<sub>2</sub> (0.4 mL); <sup>b</sup> Conversion denoted by consumption of starting material; <sup>c</sup> Isolated yield; <sup>d</sup> Without 4 Å molecular sieves; - not quantified.

#### General Procedure A for intramolecular fluorocyclisations of unsaturated oximes **6** (Scheme 4)

A Schlenk flask was charged with unsaturated oxime **6** (0.71 mmol), fluoriodane **1** (1.07 mmol), AgBF<sub>4</sub> (0.71 mmol) and 4 Å powdered molecular sieves (180 mg) in dry dichloromethane (0.4 mL) under an inert atmosphere. The reaction mixture was stirred for 15 minutes at room temperature before being concentrated *in vacuo* and the crude product was purified by column chromatography using petroleum ether : ethyl acetate (4 : 1).

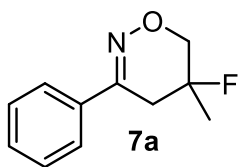

5-Fluoro-5-methyl-3-phenyl-5,6-dihydro-4*H*-1,2-oxazine **7a** was obtained as a white solid (62 mg, 46 %). Mp 62-65 °C.  $\delta_{\text{H}}$  (CDCl<sub>3</sub>, 400 MHz) 1.55 (3H, d,  $^3J_{\text{HF}} = 20.5$  Hz, CH<sub>3</sub>), 2.68 (1H, ddd,  $^3J_{\text{HF}} = 25.9$  Hz,  $^2J_{\text{HH}} = 18.3$  Hz,  $^4J_{\text{HH}} = 1.7$  Hz, CH<sub>CHD</sub>), 2.91 (1H, t,  $^3J_{\text{HF}} = ^2J_{\text{HH}} = 18.3$  Hz, CH<sub>CHD</sub>), 3.75 (1H, br dd,  $^3J_{\text{HF}} = 23.4$  Hz,  $^2J_{\text{HH}} = 11.7$  Hz, OCH<sub>AH<sub>B</sub></sub>), 4.09 (1H, ddd,  $^2J_{\text{HH}} = 11.6$  Hz,  $^3J_{\text{HF}} = 7.7$  Hz,  $^4J_{\text{HH}} = 2.1$  Hz, OCH<sub>AH<sub>B</sub></sub>), 7.40 - 7.42 (3H, m, ArH), 7.67 - 7.75 (2H, m, ArH).  $\delta_{\text{H}\{\text{F}\}}$  (CDCl<sub>3</sub>, 400 MHz) 1.53 (3H, s, CH<sub>3</sub>), 2.68 (1H, dd,  $^2J_{\text{HH}} = 18.3$  Hz,  $^4J_{\text{HH}} = 1.7$  Hz, CH<sub>CHD</sub>), 2.91 (1H, br d,  $^2J_{\text{HH}} = 18.3$  Hz, CH<sub>CHD</sub>), 3.75 (1H, br d,  $^2J_{\text{HH}} = 11.7$  Hz, OCH<sub>AH<sub>B</sub></sub>), 4.09 (1H, dd,  $^2J_{\text{HH}} = 11.7$  Hz,  $^4J_{\text{HH}} = 2.0$  Hz, OCH<sub>AH<sub>B</sub></sub>), 7.40 - 7.42 (3H, m, ArH), 7.67 - 7.75 (2H, m, ArH).  $\delta_{\text{C}}$  (CDCl<sub>3</sub>, 126 MHz) 23.5 (d,  $^2J_{\text{CF}} = 25.2$  Hz, CH<sub>3</sub>), 33.5 (d,  $^2J_{\text{CF}} = 26.4$  Hz, CH<sub>2</sub>), 70.0 (d,  $^2J_{\text{CF}} = 23.9$  Hz, CH<sub>2</sub>), 87.2 (d,  $^1J_{\text{CF}} = 173.5$  Hz, C), 125.5 (CH), 128.6 (CH), 130.0 (CH), 134.8 (C), 153.6 (C).  $\delta_{\text{F}}$  (CDCl<sub>3</sub>, 376 MHz) -147.0 (s). m/z (ASAP) 194.0981 (MH<sup>+</sup>, C<sub>11</sub>H<sub>13</sub>NOF requires 194.0981, 100 %).

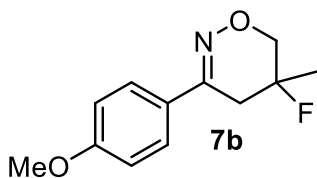

5-Fluoro-3-(4-methoxyphenyl)-5-methyl-5,6-dihydro-4*H*-1,2-oxazine product **7b** was obtained as colourless crystals/ white solid (80 mg, 53 %). Mp 105-107 °C.  $\delta_{\text{H}}$  (CDCl<sub>3</sub>, 400 MHz) 1.54 (3H, d,  $^3J_{\text{HF}} = 20.7$  Hz, CH<sub>3</sub>), 2.66 (1H, ddd,  $^3J_{\text{HF}} = 25.9$  Hz,  $^2J_{\text{HH}} = 18.3$  Hz,  $^4J_{\text{HH}} = 1.7$  Hz, CH<sub>CHD</sub>), 2.88 (1H, t,  $^3J_{\text{HF}} = ^2J_{\text{HH}} = 18.3$  Hz, CH<sub>CHD</sub>), 3.72 (1H, dd,  $^3J_{\text{HF}} = 23.4$  Hz,  $^2J_{\text{HH}} = 11.7$  Hz, OCH<sub>AH<sub>B</sub></sub>), 3.83 (3H, s, OCH<sub>3</sub>), 4.06 (1H, ddd,  $^2J_{\text{HH}} = 11.7$  Hz,  $^3J_{\text{HF}} = 7.7$  Hz,  $^4J_{\text{HH}} = 2.0$  Hz, OCH<sub>AH<sub>B</sub></sub>), 6.91 (2H, d,  $^3J_{\text{HH}} = 9.0$  Hz, ArH), 7.64 (2H, d,  $^3J_{\text{HH}} = 9.0$  Hz, ArH).  $\delta_{\text{H}\{\text{F}\}}$  (CDCl<sub>3</sub>, 400 MHz) 1.53 (3H, s, CH<sub>3</sub>), 2.66 (1H, dd,  $^2J_{\text{HH}} = 18.3$  Hz,  $^4J_{\text{HH}} = 1.7$  Hz, CH<sub>CHD</sub>), 2.88 (1H, br d,  $^2J_{\text{HH}} = 18.3$  Hz, CH<sub>CHD</sub>), 3.72 (1H, br. d,  $^2J_{\text{HH}} = 11.7$  Hz, OCH<sub>AH<sub>B</sub></sub>), 3.83 (3H, s, OCH<sub>3</sub>), 4.06 (1H, dd,  $^2J_{\text{HH}} = 11.6$ ,  $^4J_{\text{HH}} = 2.1$  Hz, OCH<sub>AH<sub>B</sub></sub>), 6.91 (2H, d,  $^3J_{\text{HH}} = 9.0$  Hz, ArH), 7.63 (2H, d,  $^3J_{\text{HH}} = 9.0$  Hz, ArH).  $\delta_{\text{C}}$  (CDCl<sub>3</sub>, 126 MHz) 23.6 (d,  $^2J_{\text{CF}} = 25.1$  Hz, CH<sub>3</sub>), 33.4 (d,  $^2J_{\text{CF}} = 26.1$  Hz, CH<sub>2</sub>), 55.4 (CH<sub>3</sub>), 70.9 (d,  $^2J_{\text{CF}} = 24.1$  Hz, CH<sub>2</sub>), 87.4 (d,  $^1J_{\text{CF}} = 173.7$  Hz, C), 113.9 (CH), 126.9 (CH), 127.3 (C), 153.3 (C), 161.0 (C).  $\delta_{\text{F}}$  (CDCl<sub>3</sub>, 376 MHz) -146.8 (s). m/z (ESI) 224.1089 (MH<sup>+</sup>, C<sub>12</sub>H<sub>15</sub>FNO<sub>2</sub> requires 224.1087, 100 %).

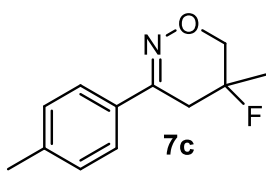

5-Fluoro-5-methyl-3-(*p*-tolyl)-5,6-dihydro-4*H*-1,2-oxazine **7c** was obtained as colourless crystals/ white solid (62 mg, 42 %). Crystals suitable for X-ray crystallography were grown by slow evaporation from a DCM and hexane (1:2) solution. Mp 103-104 °C.  $\delta_{\text{H}}$  (CDCl<sub>3</sub>, 400 MHz) 1.53 (3H, d,  $^3J_{\text{HF}} = 20.5$  Hz, CH<sub>3</sub>), 2.37 (3H, s, ArCH<sub>3</sub>), 2.66 (1H, ddd,  $^3J_{\text{HF}} = 25.9$  Hz,  $^2J_{\text{HH}} = 18.3$  Hz,  $^4J_{\text{HH}} = 1.7$  Hz, CH<sub>CHD</sub>), 2.89 (1H, t,  $^3J_{\text{HF}} = ^2J_{\text{HH}} = 18.3$  Hz, CH<sub>CHD</sub>), 3.73 (1H, dd,  $^3J_{\text{HF}} = 23.4$  Hz,  $^2J_{\text{HH}} = 11.5$  Hz, OCH<sub>AH<sub>B</sub></sub>), 4.07 (1H, ddd,  $^2J_{\text{HH}} = 11.5$  Hz,  $^3J_{\text{HF}} = 7.7$  Hz,  $^4J_{\text{HH}} = 2.0$  Hz, OCH<sub>AH<sub>B</sub></sub>), 7.20 (2H, d,  $^3J_{\text{HH}} = 8.1$  Hz, ArH), 7.58 (2H, d,  $^3J_{\text{HH}} = 8.1$  Hz, ArH).  $\delta_{\text{H}\{\text{F}\}}$  (CDCl<sub>3</sub>, 400 MHz) 1.53 (3H, s, CH<sub>3</sub>), 2.37 (3H, s,

ArCH<sub>3</sub>), 2.66 (1H, dd, <sup>2</sup>J<sub>HH</sub> = 18.4 Hz, <sup>4</sup>J<sub>HH</sub> = 1.6 Hz, CH<sub>C</sub>H<sub>D</sub>), 2.89 (1H, br d, <sup>2</sup>J<sub>HH</sub> = 18.4 Hz, CH<sub>C</sub>H<sub>D</sub>), 3.73 (1H, br d, <sup>2</sup>J<sub>HH</sub> = 11.6 Hz, OCH<sub>A</sub>H<sub>B</sub>), 4.06 (1H, dd, <sup>2</sup>J<sub>HH</sub> = 11.5 Hz, <sup>4</sup>J<sub>HH</sub> = 2.0 Hz, OCH<sub>A</sub>H<sub>B</sub>), 7.20 (2H, d, <sup>3</sup>J<sub>HH</sub> = 8.6 Hz, ArH), 7.58 (2H, d, <sup>3</sup>J<sub>HH</sub> = 8.6 Hz, ArH). δ<sub>C</sub> (CDCl<sub>3</sub>, 126 MHz) 21.3 (CH<sub>3</sub>), 23.6 (d, <sup>2</sup>J<sub>CF</sub> = 24.6 Hz, CH<sub>3</sub>), 33.5 (d, <sup>2</sup>J<sub>CF</sub> = 26.0 Hz, CH<sub>2</sub>), 70.9 (d, <sup>2</sup>J<sub>CF</sub> = 24.6 Hz, CH<sub>2</sub>), 87.4 (d, <sup>1</sup>J<sub>CF</sub> = 173.5 Hz, C) 125.4 (CH), 129.29 (CH), 132.0 (C), 140.2 (C), 153.7 (C). δ<sub>F</sub> (CDCl<sub>3</sub>, 376 MHz) -146.8 (s). m/z (ASAP) 208.1138 (MH<sup>+</sup>, C<sub>12</sub>H<sub>15</sub>FNO requires 208.1138, 100 %).

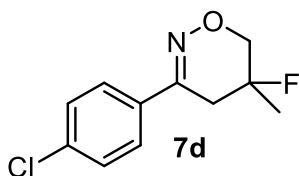

3-(4-Chlorophenyl)-5-fluoro-5-methyl-5,6-dihydro-4H-1,2-oxazine **7d**

was obtained as a colourless crystals/ white solid (61 mg, 42 %). Crystals suitable for X-ray crystallography were grown by slow evaporation from a DCM and hexane (1:2) solution. Mp 98-99 °C. δ<sub>H</sub> (CDCl<sub>3</sub>, 400 MHz) 1.55 (3H, d, <sup>3</sup>J<sub>HF</sub> = 20.5 Hz, CH<sub>3</sub>), 2.64 (1H, ddd, <sup>3</sup>J<sub>HF</sub> = 26.5 Hz, <sup>2</sup>J<sub>HH</sub> = 18.4 Hz, <sup>4</sup>J<sub>HH</sub> = 1.7 Hz, CH<sub>C</sub>H<sub>D</sub>), 2.87 (1H, t, <sup>3</sup>J<sub>HF</sub> = <sup>2</sup>J<sub>HH</sub> = 18.4 Hz, CH<sub>C</sub>H<sub>D</sub>), 3.74 (1H, dd, <sup>3</sup>J<sub>HF</sub> = 24.1 Hz, <sup>2</sup>J<sub>HH</sub> = 11.7 Hz, OCH<sub>A</sub>H<sub>B</sub>), 4.10 (1H, ddd, <sup>2</sup>J<sub>HH</sub> = 11.7 Hz, <sup>3</sup>J<sub>HF</sub> = 7.6 Hz, <sup>4</sup>J<sub>HH</sub> = 2.2 Hz, OCH<sub>A</sub>H<sub>B</sub>), 7.37 (2H, d, <sup>3</sup>J<sub>HH</sub> = 8.7 Hz, ArH), 7.63 (2H, d, <sup>3</sup>J<sub>HH</sub> = 8.7 Hz, ArH). δ<sub>H{F}</sub> (CDCl<sub>3</sub>, 400 MHz) 1.55 (3H, s, CH<sub>3</sub>), 2.64 (1H, dd, <sup>2</sup>J<sub>HH</sub> = 18.4 Hz, <sup>4</sup>J<sub>HH</sub> = 1.7 Hz, CH<sub>C</sub>H<sub>D</sub>), 2.87 (1H, br d, <sup>2</sup>J<sub>HH</sub> = 18.4 Hz, CH<sub>C</sub>H<sub>D</sub>), 3.74 (1H, br d, <sup>2</sup>J<sub>HH</sub> = 11.7 Hz, OCH<sub>A</sub>H<sub>B</sub>), 4.10 (1H, dd, <sup>2</sup>J<sub>HH</sub> = 11.6, <sup>4</sup>J<sub>HH</sub> = 2.2 Hz, OCH<sub>A</sub>H<sub>B</sub>), 7.37 (2H, d, <sup>3</sup>J<sub>HH</sub> = 8.7 Hz, ArH), 7.63 (2H, d, <sup>3</sup>J<sub>HH</sub> = 8.7 Hz, ArH). δ<sub>C</sub> (CDCl<sub>3</sub>, 126 MHz) 23.5 (d, <sup>2</sup>J<sub>CF</sub> = 24.2 Hz, CH<sub>3</sub>), 33.3 (d, <sup>2</sup>J<sub>CF</sub> = 26.2 Hz, CH<sub>2</sub>), 71.0 (d, <sup>2</sup>J<sub>CF</sub> = 25.2 Hz, OCH<sub>2</sub>), 86.9 (d, <sup>1</sup>J<sub>CF</sub> = 174.1 Hz, C), 126.7 (CH), 128.8 (CH), 133.3 (C), 136.1 (C), 152.5 (C). δ<sub>F</sub> (CDCl<sub>3</sub>, 376 MHz) -147.4 (s). m/z (ASAP) 228.0591 (MH<sup>+</sup>, C<sub>11</sub>H<sub>12</sub>NO<sup>35</sup>ClF requires 228.0591, 100 %), 230.0575 (MH<sup>+</sup>, C<sub>11</sub>H<sub>12</sub>NO<sup>37</sup>ClF requires 230.0562, 33 %).

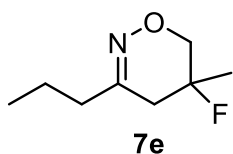

5-Fluoro-5-methyl-3-propyl-5,6-dihydro-4H-1,2-oxazine **7e** was obtained as a

colourless oil (25 mg, 22 %). δ<sub>H</sub> (CDCl<sub>3</sub>, 400 MHz) 0.95 (3H, t, <sup>3</sup>J<sub>HH</sub> = 7.3 Hz, CH<sub>3</sub>), 1.44 (3H, d, <sup>3</sup>J<sub>HF</sub> = 20.5 Hz, CH<sub>3</sub>), 1.52 - 1.63 (2H, m, CH<sub>2</sub>), 2.20 - 2.25 (3H, m, CH<sub>2</sub> and CH<sub>C</sub>H<sub>D</sub>), 2.41 (1H, t, <sup>3</sup>J<sub>HF</sub> = <sup>2</sup>J<sub>HH</sub> = 18.0 Hz, CH<sub>C</sub>H<sub>D</sub>), 3.61 (1H, dd, <sup>3</sup>J<sub>HF</sub> = 23.0 Hz, <sup>2</sup>J<sub>HH</sub> = 11.7 Hz, OCH<sub>A</sub>H<sub>B</sub>), 3.91 (1H, ddd, <sup>2</sup>J<sub>HH</sub> = 11.7 Hz, <sup>3</sup>J<sub>HF</sub> = 8.0 Hz, <sup>4</sup>J<sub>HH</sub> = 2.0 Hz, OCH<sub>A</sub>H<sub>B</sub>). δ<sub>H{F}</sub> (CDCl<sub>3</sub>, 400 MHz) 0.95 (3H, t, <sup>3</sup>J<sub>HH</sub> = 7.3 Hz, CH<sub>3</sub>), 1.44 (3H, s, CH<sub>3</sub>), 1.52 - 1.63 (2H, m, CH<sub>2</sub>), 2.20 - 2.25 (3H, m, CH<sub>2</sub> and CH<sub>C</sub>H<sub>D</sub>), 2.41 (1H, d, <sup>2</sup>J<sub>HH</sub> = 18.0 Hz, CH<sub>C</sub>H<sub>D</sub>), 3.61 (1H, d, <sup>2</sup>J<sub>HH</sub> = 11.7 Hz, OCH<sub>A</sub>H<sub>B</sub>), 3.91 (1H, dd, <sup>2</sup>J<sub>HH</sub> = 11.7 Hz, <sup>4</sup>J<sub>HH</sub> = 2.0 Hz, OCH<sub>A</sub>H<sub>B</sub>). δ<sub>C</sub> (CDCl<sub>3</sub>, 126 MHz) 13.5 (CH<sub>3</sub>), 19.5 (CH<sub>2</sub>), 23.4 (d, <sup>2</sup>J<sub>CF</sub> = 25.1 Hz, CH<sub>3</sub>), 34.8 (d, <sup>2</sup>J<sub>CF</sub> = 26.1 Hz, CH<sub>2</sub>), 37.2 (CH<sub>2</sub>), 70.7 (d, <sup>2</sup>J<sub>CF</sub> = 25.1 Hz, CH<sub>2</sub>), 87.5 (d, <sup>1</sup>J<sub>CF</sub> = 173.7 Hz, C), 157.4 (C). δ<sub>F</sub> (CDCl<sub>3</sub>, 376 MHz) -146.8 (s). m/z (ASAP) 160.1136 (MH<sup>+</sup>, C<sub>8</sub>H<sub>15</sub>FNO requires 160.1136, 100 %).

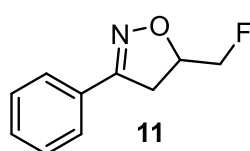

**11**

5-(Fluoromethyl)-3-phenyl-4,5-dihydro-1,2-oxazole **11** was obtained as a white solid (29 mg, 23 %). The characterisation data was in agreement with the literature.<sup>3a</sup>  $\delta_{\text{H}}$  (CDCl<sub>3</sub>, 400 MHz) 3.32 (1H, dd,  $^2J_{\text{HH}} = 17.0$  Hz,  $^3J_{\text{HH}} = 7.2$  Hz, CH<sub>A</sub>H<sub>B</sub>), 3.48 (1H, dd,  $^2J_{\text{HH}} = 17.0$  Hz,  $^3J_{\text{HH}} = 11.2$  Hz, CH<sub>A</sub>H<sub>B</sub>), 4.57 (2H, ddd,  $^2J_{\text{HF}} = 48.0$  Hz,  $^3J_{\text{HH}} = 4.4$  Hz,  $^4J_{\text{HH}} = 1.6$  Hz, CH<sub>2</sub>F), 4.99 (1H, dddd,  $^3J_{\text{HF}} = 19.3$  Hz,  $^3J_{\text{HH}} = 11.2$  Hz,  $^3J_{\text{HH}} = 7.2$  Hz,  $^3J_{\text{HH}} = 4.4$  Hz, CH), 7.37 - 7.50 (3H, m, ArH), 7.65 - 7.74 (2H, m, ArH).  $\delta_{\text{H}\{\text{F}\}}$  (CDCl<sub>3</sub>, 400 MHz) 3.31 (1H, dd,  $^2J_{\text{HH}} = 16.7$  Hz,  $^3J_{\text{HH}} = 7.8$  Hz, CH<sub>A</sub>H<sub>B</sub>), 3.48 (1H, dd,  $^2J_{\text{HH}} = 16.7$  Hz,  $^3J_{\text{HH}} = 11.2$  Hz, CH<sub>A</sub>H<sub>B</sub>), 4.55 (2H, d,  $^3J_{\text{HH}} = 4.4$  Hz, CH<sub>2</sub>F), 4.98 (1H, ddt,  $^3J_{\text{HH}} = 11.2$  Hz,  $^3J_{\text{HH}} = 7.2$  Hz,  $^3J_{\text{HH}} = 4.4$  Hz, CH), 7.39 - 7.48 (3H, m, ArH), 7.65 - 7.73 (2 H, m, ArH).  $\delta_{\text{C}}$  (CDCl<sub>3</sub>, 100 MHz) 36.2 (d,  $^3J_{\text{CF}} = 6.4$  Hz, CH<sub>2</sub>), 78.7 (d,  $^2J_{\text{CF}} = 20.7$  Hz, CH), 82.8 (d,  $^1J_{\text{CF}} = 174.8$  Hz, CH<sub>2</sub>), 126.8 (CH), 128.8 (CH), 129.1 (C), 130.3 (CH), 156.2 (C).  $\delta_{\text{F}}$  (CDCl<sub>3</sub>, 376 MHz) -230.5 (s). m/z (ESI) 180.0825 (MH<sup>+</sup>, C<sub>10</sub>H<sub>11</sub>FNO requires 180.0824, 100 %).

**Table S5:** Comparison of intramolecular fluorocyclisation of unsaturated oxime **6c** with 1 and 2 equivalents of AgBF<sub>4</sub> in solution

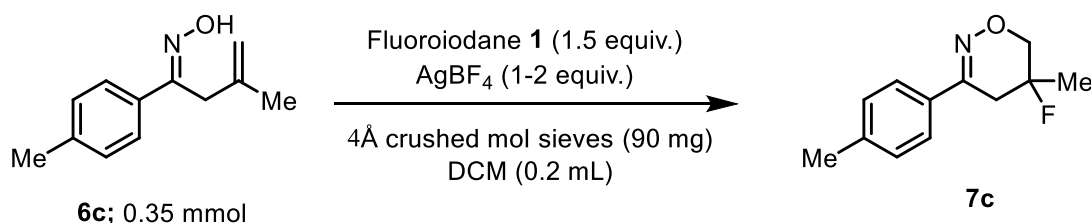

| Time (min.) | Yield <b>7c</b> (1 equiv. AgBF <sub>4</sub> ) <sup>a</sup> | Yield <b>7c</b> (2 equiv. AgBF <sub>4</sub> ) <sup>a</sup> |
|-------------|------------------------------------------------------------|------------------------------------------------------------|
| 15          | 44                                                         | 38                                                         |
| 60          | 46                                                         | 48                                                         |
| 180         | 47                                                         | 49                                                         |

<sup>a</sup>Yield determined by <sup>19</sup>F NMR spectroscopy using benzotrifluoride as an internal standard

### General Procedure for Table S5

A flame-dried flask was charged with unsaturated oxime **6c** (66 mg, 0.35 mmol), fluoroiodane **1** (146 mg, 0.525 mmol), AgBF<sub>4</sub> (1 or 2 equiv.) and 4 Å powdered molecular sieves (90 mg) in dry dichloromethane (0.2 mL) under an inert atmosphere. Finally, benzotrifluoride (14 μL, 0.116 mmol) was added as an internal standard. After the desired reaction periods, aliquots (20 μL) were taken from the reaction mixture and diluted with dichloromethane (~1 mL). The yield was then determined by <sup>19</sup>F NMR spectroscopy within 3-5 minutes of the aliquot being taken.

## General Procedure B for intramolecular fluorocyclisations of unsaturated oximes **6** with fluoroiodane in a ball-mill (Scheme 4)

To a 10 mL stainless steel jar (Retsch) was added a 2.5 g stainless steel milling ball. Unsaturated oxime (0.25 mmol), fluoroiodane **1** (0.1050 g, 0.375 mmol) and silver tetrafluoroborate (0.0974, 0.5 mmol) were added under an air atmosphere. The milling jar was then screwed closed and milled at 30 Hz for 1 hour. After the desired reaction, the mixture was transferred to a flask with  $\text{CHCl}_3$  (~2-5 mL). The crude NMR yield was determined by adding benzotrifluoride (10  $\mu\text{L}$ , 0.083 mmol) as an internal standard. The crude product was concentrated under reduced pressure and purified by flash column chromatography using petroleum ether: ethyl acetate (4:1). In some cases the product could then be further purified by triturating with hexane to remove any iodoalcohol (by-product from fluoroiodane reagent). Fluorinated dihydrooxazines **7a-d** and **7f** were prepared using this procedure.

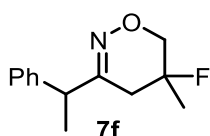

The crude product was purified initially by flash column chromatography (5-20% EtOAc in hexane) and then further purified by vacuum Kugelröhr distillation (80-85° C) to give 5-fluoro-5-methyl-3-(1-phenylethyl)-5,6-dihydro-4H-1,2-oxazine

(21 mg, 47%) as a colourless oil with an approximate d.r. of 3:2.

*Data for major diastereomer:*  $\delta_{\text{H}}$  (500 MHz,  $\text{CDCl}_3$ ) 1.33 (3H, d,  $^3J_{\text{HF}} = 20.7$  Hz,  $\text{CFCH}_3$ ), 1.50 (3H, d,  $^3J_{\text{HH}} = 7.1$  Hz,  $\text{CHCH}_3\text{Ph}$ ), 1.89-2.35 (2H, m,  $\text{CH}_2$ ), 3.51-3.73 (2H, m,  $\text{OCH}_2$ ), 3.86-3.99 (1H, m,  $\text{CHPh}$ ), 7.24-7.28 (3H, m, ArH), 7.32-7.36 (2H, m, ArH).  $\delta_{\text{C}}$  (126 MHz,  $\text{CDCl}_3$ ) 18.0 ( $\text{CH}_3$ ), 23.4 (d,  $^2J_{\text{CF}} = 24.8$  Hz,  $\text{CH}_3$ ), 33.1 (d,  $^2J_{\text{CF}} = 25.9$  Hz,  $\text{CH}_2$ ), 45.4 (CH), 71.1 (d,  $^2J_{\text{CF}} = 24.7$  Hz,  $\text{CH}_2$ ), 87.6 (d,  $^1J_{\text{CF}} = 174.0$  Hz, C), 127.3 (CH), 127.6 (CH), 129.0 (CH), 141.7 (C), 159.8 (C).  $\delta_{\text{F}}$  (376 MHz,  $\text{CDCl}_3$ ) -147.3 (s).  $m/z$  (ESI) 229.1298 ( $\text{MH}^+$ ,  $\text{C}_{13}\text{H}_{17}\text{FNO}$  requires 222.1924).

*Data for minor diastereomer:*  $\delta_{\text{H}}$  (500 MHz,  $\text{CDCl}_3$ ) (*selected*) 1.31 (3H, d,  $^3J_{\text{HF}} = 20.7$  Hz,  $\text{CFCH}_3$ ).  $\delta_{\text{C}}$  (126 MHz,  $\text{CDCl}_3$ ) 18.3 ( $\text{CH}_3$ ), 23.3 (d,  $^2J_{\text{CF}} = 24.8$  Hz,  $\text{CH}_3$ ), 33.7 (d,  $^2J_{\text{CF}} = 25.9$  Hz,  $\text{CH}_2$ ), 46.0 (CH), 71.1 (d,  $^2J_{\text{CF}} = 24.4$  Hz,  $\text{CH}_2$ ), 87.6 (d,  $^1J_{\text{CF}} = 173.7$  Hz, C), 127.3 (CH), 127.6 (CH), 129.0 (CH), 142.0 (C), 159.5 (C).  $\delta_{\text{F}}$  (376 MHz,  $\text{CDCl}_3$ ) -147.5.  $m/z$  (ESI) 229.1298 ( $\text{MH}^+$ ,  $\text{C}_{13}\text{H}_{17}\text{FNO}$  requires 222.1924).

## 5-(((2-(2-Iodophenyl)propan-2-yl)oxy)methyl)-5-methyl-3-phenyl-4,5-dihydroisoxazole **8**

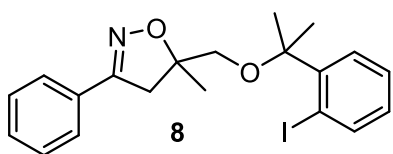

$\delta_{\text{H}}$  ( $\text{CDCl}_3$ , 400 MHz) 1.52 (3H, s,  $\text{CH}_3$ ), 1.69 (3H, s,  $\text{CH}_3$ ), 1.71 (3H, s,  $\text{CH}_3$ ), 2.97 (1H, d,  $^2J_{\text{HH}} = 16.6$  Hz,  $\text{CH}_\text{A}\text{H}_\text{B}$ ), 3.19 (1H, d,  $^2J_{\text{HH}} = 9.5$  Hz,  $\text{OCH}_\text{C}\text{H}_\text{D}$ ), 3.23 (1H, d,  $^2J_{\text{HH}} = 9.5$  Hz,  $\text{OCH}_\text{C}\text{H}_\text{D}$ ), 3.70 (1H, d,  $^2J_{\text{HH}} = 16.6$  Hz,  $\text{CH}_\text{A}\text{H}_\text{B}$ ), 6.89 (1H, td,  $^3J_{\text{HH}} = 7.5$  Hz,  $^4J_{\text{HH}} = 1.6$  Hz, ArH), 7.29 (1H, td,  $^3J_{\text{HH}} = 7.5$  Hz,  $^4J_{\text{HH}} = 1.4$  Hz, ArH), 7.37-7.41 (4H, m, ArH), 7.65 - 7.68 (2H, m, ArH), 7.98 (1H, dd,  $^3J_{\text{HH}} = 7.8$  Hz,  $^4J_{\text{HH}} = 1.4$  Hz, ArH).  $\delta_{\text{C}}$  ( $\text{CDCl}_3$ , 126 MHz) 23.8 ( $\text{CH}_3$ ), 26.8 ( $\text{CH}_3$ ), 43.0 ( $\text{CH}_2$ ), 66.7 ( $\text{CH}_2$ ), 77.5

(C), 86.4 (C), 93.8 (CI), 126.6 (CH), 128.0 (CH), 128.1 (CH), 128.6 (CH), 128.9 (CH), 129.8 (CH), 130.2 (C), 143.2 (CH), 145.1 (C), 156.7 (C).  $m/z$  (ASAP) 436.0775 ( $MH^+$ ,  $C_{20}H_{23}INO_2$  requires 436.0773, 100 %).

### 5-(Fluoromethyl)-5-methyl-3-phenyl-4,5-dihydroisoxazole **9**

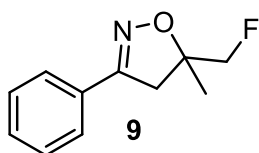

The pure product **9** was obtained as a colourless oil and the characterisation data was in agreement with the literature.<sup>3a</sup>  $\delta_H$  ( $CDCl_3$ , 400 MHz) 1.52 (3H, d,  $^4J_{HF} = 2.0$  Hz,  $CH_3$ ), 3.09 (1H, dd,  $^2J_{HH} = 16.7$  Hz,  $^4J_{HF} = 1.7$  Hz,  $CH_AH_B$ ), 3.44 (1H, dd,  $^2J_{HH} = 16.7$  Hz,  $^4J_{HF} = 1.0$  Hz,  $CH_AH_B$ ), 4.36 (1H, dd,  $^2J_{HF} = 47.0$  Hz,  $^2J_{HH} = 9.4$  Hz,  $CH_AH_BF$ ), 4.42 (1H, dd,  $^2J_{HF} = 47.0$  Hz,  $^2J_{HH} = 9.4$  Hz,  $CH_AH_BF$ ), 7.35 - 7.46 (3H, m, ArH), 7.59 - 7.73 (2H, m, ArH).  $\delta_{H\{F\}}$  ( $CDCl_3$ , 400 MHz) 1.52 (3H, s,  $CH_3$ ), 3.09 (1H, d,  $^2J_{HH} = 16.7$  Hz,  $CH_AH_B$ ), 3.44 (1H, d,  $^2J_{HH} = 16.7$  Hz,  $CH_AH_B$ ), 4.36 (1H, d,  $^2J_{HH} = 9.4$  Hz,  $CH_AH_BF$ ), 4.42 (1H, d,  $^2J_{HH} = 9.4$  Hz,  $CH_AH_BF$ ), 7.36 - 7.44 (3H, m, ArH), 7.59 - 7.73 (2H, m, ArH).  $\delta_C$  ( $CDCl_3$ , 126 MHz) 22.0 (d,  $^3J_{CF} = 3.2$  Hz,  $CH_3$ ), 42.2 (d,  $^3J_{CF} = 4.0$  Hz,  $CH_2$ ), 85.2 (d,  $^2J_{CF} = 18.3$  Hz, C), 85.5 (d,  $^1J_{CF} = 178.0$  Hz,  $CH_2$ ), 126.6 (CH), 128.7 (CH), 129.6 (C), 130.2 (CH), 156.2 (C).  $\delta_F$  ( $CDCl_3$ , 376 MHz) -225.3 (s).  $m/z$  (ASAP) 194.0981 ( $MH^+$ ,  $C_{11}H_{13}NOF$  requires 194.0981, 100 %).

### 5-Methyl-3-phenyl-6H-1,2-oxazine **10**

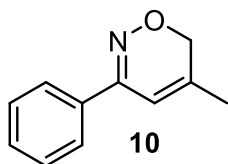

The characterisation data was in agreement with the literature.<sup>37</sup> Mp 34-36 °C (lit.,<sup>37</sup> 32-33 °C).  $\delta_H$  ( $CDCl_3$ , 400 MHz) 1.99 (3H, s,  $CH_3$ ), 4.38 (2H, s,  $OCH_2$ ), 6.20 (1H, s, CH), 7.34 - 7.46 (3H, m, ArH), 7.60 - 7.76 (2H, m, ArH).  $\delta_C$  ( $CDCl_3$ , 126 MHz) 19.7 ( $CH_3$ ), 66.5 ( $CH_2$ ), 110.9 (CH), 126.0 (CH), 128.6 (CH), 129.9 (CH), 134.0 (C), 141.5 (C), 156.9 (C).  $m/z$  (ASAP) 174.0916 ( $MH^+$ ,  $C_{11}H_{12}NO$  requires 174.0919, 100 %).

**Table S6:** Mechanochemical optimisation of intramolecular fluorocyclisation of unsaturated carboxylic acid **12a**

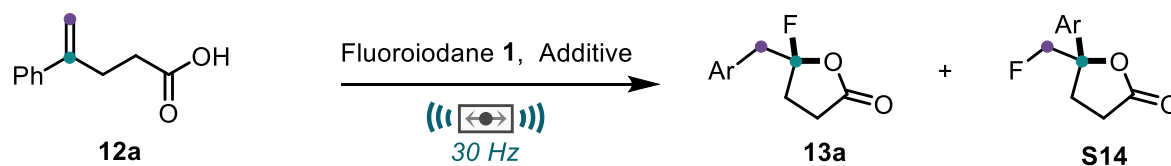

| Entry | Scale (mmol) | Jar   | Ball    | F-iodane equiv. | Time (h) | Additive        | Yield 13a <sup>a</sup> | Yield S14 <sup>a</sup> |
|-------|--------------|-------|---------|-----------------|----------|-----------------|------------------------|------------------------|
| 1     | 0.5          | 10 mL | 2.5 g   | 1.5             | 2        | X               | 23                     | 0                      |
| 2     | 0.5          | 10 mL | 2.5 g   | 1.5             | 2        | HFIP (2 equiv.) | 44                     | 0                      |
| 3     | 0.25         | 5 mL  | 1 x 1.5 | 1.5             | 2        | HFIP (2 equiv.) | 25                     | 0                      |
| 4     | 0.25         | 5 mL  | 3 x 0.5 | 1.5             | 2        | HFIP (2 equiv.) | 40                     | 0                      |
| 5     | 0.25         | 10 mL | 1 x 2.5 | 1.5             | 2        | HFIP (2 equiv.) | 55                     | 0                      |
| 6     | 0.125        | 5 mL  | 3 x 1.5 | 1.5             | 2        | HFIP (2 equiv.) | 34                     | 0                      |
| 7     | 0.25         | 10    | 2.5     | 1.5             | 0.5      | HFIP (2 equiv.) | 36                     | 0                      |
| 8     | 0.25         | 10    | 2.5     | 1.5             | 1        | HFIP (2 equiv.) | 57                     | 0                      |
| 9     | 0.25         | 10    | 2.5     | 1.5             | 1        | HFIP (1 equiv.) | 22                     | 0                      |
| 10    | 0.25         | 10    | 2.5     | 1.5             | 1        | HFIP (3 equiv.) | 70                     | 0                      |
| 11    | 0.25         | 10    | 2.5     | 1.5             | 1        | HFIP (4 equiv.) | 83                     | 0                      |
| 12    | 0.25         | 10    | 2.5     | 1.5             | 1        | HFIP (5 equiv.) | 96 (96) <sup>b</sup>   | 0                      |
| 13    | 0.25         | 10    | 2.5     | 1               | 1        | HFIP (5 equiv.) | 84                     | 0                      |

<sup>a</sup> Yield determined by <sup>19</sup>F NMR spectroscopy using benzotrifluoride (10 μL, 0.083 mmol) as an internal standard. <sup>b</sup> Isolated yield

### General procedure for the intramolecular fluorocyclisations of unsaturated carboxylic acids **12** in a ball-mill (Scheme 5)

To a 10 mL stainless steel jar (Retsch) was added a 2.5 g stainless steel milling ball. Unsaturated carboxylic acid (0.25 mmol), fluoroiodane **1** (0.1050 g, 0.375 mmol) and 1,1,1,3,3,3-hexafluoro-2-propanol (130 μL, 1.25 mmol) were added under an air atmosphere. The milling jar was then screwed closed and milled at 30 Hz for 1 hour. After the desired reaction, the mixture was transferred to a flask with CHCl<sub>3</sub> (~2-5 mL). The crude NMR yield was determined by adding benzotrifluoride (10 μL, 0.083 mmol) as an internal standard. The crude product was concentrated under reduced pressure and purified by flash column chromatography using the noted solvent systems.

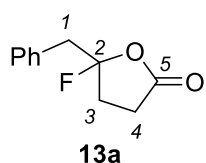

The crude product was purified by column chromatography (dichloromethane) to give 5-benzyl-5-fluorodihydrofuran-2(3*H*)-one **13a** as a colourless oil (47 mg, 96%). The characterisation data was in agreement with the literature.<sup>6a</sup>  $\delta_{\text{H}}$  (CDCl<sub>3</sub>, 400 MHz) 2.15-2.30 (2H, m, H<sub>3</sub> and H<sub>3'</sub>), 2.42 (1H, dm, on fluorine decoupling simplifies to ddd,  $^2J_{\text{HH}} = 17.8$  Hz,  $^3J_{\text{HH}} = 8.7$  Hz,  $^3J_{\text{HH}} = 3.1$  Hz, H<sub>4</sub>), 2.74 (1H, ddd,  $^2J_{\text{HH}} = 17.8$  Hz,  $^3J_{\text{HH}} = 10.5$  Hz,  $^3J_{\text{HH}} = 9.3$  Hz, H<sub>4'</sub>), 3.29 (2H, d,  $^3J_{\text{HF}} = 14.7$  Hz, H<sub>1</sub> and H<sub>1'</sub>), 7.28 – 7.36 (5H, m, ArH);  $\delta_{\text{F}}$  (CDCl<sub>3</sub>, 376 MHz) -97.0 (s);  $\delta_{\text{C}}$  (CDCl<sub>3</sub>, 100 MHz) 27.0 (CH<sub>2</sub>), 30.9 (d,  $^2J_{\text{CF}} = 27.7$  Hz, CH<sub>2</sub>), 42.7 (d,  $^2J_{\text{CF}} = 28.0$  Hz, CH<sub>2</sub>), 119.2 (d,  $^1J_{\text{CF}} = 230.7$  Hz, C), 127.6 (CH), 128.6 (CH), 130.4 (CH), 133.0 (d,  $^3J_{\text{CF}} = 5.1$  Hz, C), 174.7 (CO); *m/z* (ASAP) 195.0822 (MH<sup>+</sup>. C<sub>11</sub>H<sub>12</sub>FO<sub>2</sub> requires 195.0821, 20 %), 175.0722 ((M-F)<sup>+</sup>, 100%).

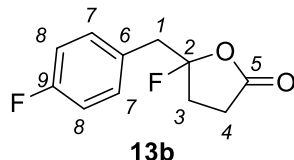

The crude product was purified by column chromatography (dichloromethane) to give 5-fluoro-5-(4-fluorobenzyl)-dihydrofuran-2(3*H*)-one **13b** as a colourless oil (48 mg, 90%). The characterisation data was in agreement with the literature.<sup>6a</sup>  $\delta_{\text{H}}$  (CDCl<sub>3</sub>, 400 MHz) 2.14-2.34 (2H, m, H<sub>3</sub> and H<sub>3'</sub>), 2.42 – 2.49 (1H, m, on fluorine decoupling simplifies to ddd,  $^2J_{\text{HH}} = 18.1$  Hz,  $^3J_{\text{HH}} = 9.3$  Hz,  $^3J_{\text{HH}} = 2.3$  Hz, H<sub>4</sub>), 2.75 (1H, ddd,  $^2J_{\text{HH}} = 18.1$  Hz,  $^3J_{\text{HH}} = 10.7$  Hz,  $^3J_{\text{HH}} = 9.4$  Hz, H<sub>4'</sub>), 3.26 (2H, d,  $^3J_{\text{HF}} = 14.8$  Hz, H<sub>1</sub> and H<sub>1'</sub>), 7.02 (2H, t,  $^3J_{\text{HF}} = ^3J_{\text{HH}} = 8.7$  Hz, ArH), 7.26 (2H, dd,  $^3J_{\text{HH}} = 8.7$  Hz,  $^4J_{\text{HF}} = 5.5$  Hz, ArH);  $\delta_{\text{F}}$  (CDCl<sub>3</sub>, 376 MHz) -97.8 (1F, s, CF), -114.8 (1F, s, ArF);  $\delta_{\text{C}}$  (CDCl<sub>3</sub>, 100 MHz) 26.9 (CH<sub>2</sub>), 30.9 (d,  $^2J_{\text{CF}} = 28.8$  Hz, CH<sub>2</sub>), 41.8 (d,  $^2J_{\text{CF}} = 28.1$  Hz, CH<sub>2</sub>), 115.5 (d,  $^2J_{\text{CF}} = 22.2$  Hz, CH), 118.9 (d,  $^1J_{\text{CF}} = 231.4$  Hz, C), 128.7 (C), 131.9 (d,  $^3J_{\text{CF}} = 8.0$  Hz, CH), 162.3 (d,  $^1J_{\text{CF}} = 245.9$  Hz, C), 174.7 (CO); *m/z* (ASAP) 193.0664 ((M-F)<sup>+</sup>. C<sub>11</sub>H<sub>10</sub>FO<sub>2</sub> requires 193.0665, 100 %).

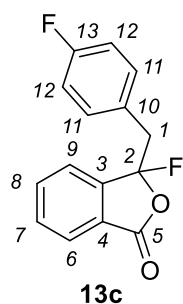

The crude product was purified by column chromatography (dichloromethane) to give 3-fluoro-3-(4-fluorobenzyl)isobenzofuran-1(3*H*)-one **13c** as a white solid (57 mg, 88%). The characterisation data was in agreement with the literature.<sup>6a</sup> mp 69 – 71 °C.  $\delta_{\text{H}}$  (CDCl<sub>3</sub>, 400 MHz) 3.51 (1H, dd,  $^2J_{\text{HH}} = 14.5$  Hz,  $^3J_{\text{HF}} = 14.3$  Hz, H<sub>1</sub>), 3.57 (1H, dd,  $^2J_{\text{HH}} = 14.5$  Hz,  $^3J_{\text{HF}} = 12.7$  Hz, H<sub>1'</sub>), 6.93 (2H, t,  $^3J_{\text{HH}} = ^3J_{\text{HF}} = 8.6$  Hz, ArH), 7.17 (2H, dd,  $^3J_{\text{HH}} = 8.6$  Hz,  $^4J_{\text{HF}} = 5.5$  Hz, ArH), 7.37 (1H, d,  $^3J_{\text{HH}} = 7.5$  Hz, ArH),

7.60 (1H, t,  $^3J_{\text{HH}} = 7.6$  Hz, ArH), 7.69 (1H, t,  $^3J_{\text{HH}} = 7.5$  Hz, ArH), 7.81 (1H, d,  $^3J_{\text{HH}} = 7.5$  Hz, ArH);  $\delta_{\text{F}}$  (CDCl<sub>3</sub>, 376 MHz) -101.0 (1F, s, CF), -114.6 (1F, s, ArF);  $\delta_{\text{C}}$  (CDCl<sub>3</sub>, 125 MHz) 41.6 (d,  $^2J_{\text{CF}} = 31.3$  Hz, CH<sub>2</sub>), 115.0 (d,  $^1J_{\text{CF}} = 233.2$  Hz, CF), 115.4 (d,  $^2J_{\text{CF}} = 21.7$  Hz, CH), 123.0 (CH), 125.8 (CH), 126.3 (d,  $^3J_{\text{CF}} = 1.4$  Hz, C), 127.8 (dd,  $^3J_{\text{CF}} = 5.6$  Hz,  $^4J_{\text{CF}} = 3.2$  Hz, C), 131.7 (d,  $^3J_{\text{CF}} = 2.3$  Hz, CH), 132.2 (d,  $^3J_{\text{CF}} = 8.3$  Hz, CH), 134.8 (CH), 144.5 (d,  $^2J_{\text{CF}} = 21.2$  Hz, C), 162.3 (d,  $^1J_{\text{CF}} = 246.9$



Hz, C), 166.4 (d,  $^3J_{CF} = 2.1$  Hz, CO);  $m/z$  (ASAP) 241.0656 ((M-F)<sup>+</sup>. C<sub>15</sub>H<sub>10</sub>O<sub>2</sub>F requires 241.0665, 100%), 213.0694 ((M-COF)<sup>+</sup>, 95%).

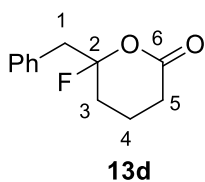

The crude product was purified by column chromatography (dichloromethane) to give 6-benzyl-6-fluorotetrahydro-2H-pyran-2-one **13d** as a colourless oil (38 mg, 73%). The characterisation data was in agreement with the literature.<sup>6a</sup>  $\delta_H$  (CDCl<sub>3</sub>, 400 MHz) 1.63 – 1.82 (2H, m, H<sub>3</sub> and H<sub>4</sub>), 1.96 – 2.11 (2H, m, H<sub>3'</sub> and H<sub>4'</sub>), 2.35

– 2.45 (1H, m, H<sub>5</sub>), 2.69 (1H, dm, H<sub>5'</sub>), 3.20 (2H, d,  $^3J_{HF} = 14.8$  Hz, H<sub>1</sub> and H<sub>1'</sub>), 7.26 – 7.34 (5H, m, ArH);  $\delta_F$  (CDCl<sub>3</sub>, 376 MHz) -96.8 (s);  $\delta_C$  (CDCl<sub>3</sub>, 100 MHz) 14.8 (d,  $^3J_{CF} = 3.2$  Hz, CH<sub>2</sub>), 28.8 (d,  $^2J_{CF} = 26.9$  Hz, CH<sub>2</sub>), 29.1 (CH<sub>2</sub>), 45.2 (d,  $^2J_{CF} = 26.7$  Hz, CH<sub>2</sub>), 115.5 (d,  $^1J_{CF} = 228.0$  Hz, C), 127.4 (CH), 128.5 (CH), 130.5 (CH), 133.5 (d,  $^3J_{CF} = 5.5$  Hz, C), 168.8 (CO);  $m/z$  (ASAP) 189.0923 ((M-F)<sup>+</sup>. C<sub>12</sub>H<sub>13</sub>O<sub>2</sub> requires 189.0916, 5%), 161.0948 ((PhCH<sub>2</sub>COCH<sub>2</sub>CH<sub>2</sub>CH<sub>2</sub>)<sup>+</sup>, 100%).

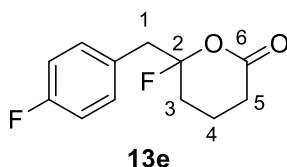

The crude product was purified by column chromatography (5% then 20% EtOAc in hexane) to give 6-fluoro-6-(4-fluorobenzyl)tetrahydro-2H-pyran-2-one **13e** as a colourless oil (48 mg, 84%).  $\delta_H$  (CDCl<sub>3</sub>, 500 MHz) 1.63 –

1.84 (2H, m, H<sub>3</sub> and H<sub>4</sub>), 1.95 – 2.12 (2H, m, H<sub>3'</sub> and H<sub>4'</sub>), 2.36 – 2.46 (1H, m, H<sub>5</sub>), 2.69 (1H, dddd,  $^2J_{HH} = 17.9$  Hz,  $^3J_{HH} = 6.7$  & 3.6 Hz,  $^4J_{HH} = 1.3$  Hz, H<sub>5'</sub>), 3.17 (2H, d,  $^3J_{HF} = 14.9$  Hz, H<sub>1</sub> and H<sub>1'</sub>), 6.97 – 7.04 (2H, m, ArH), 7.21 – 7.29 (2H, m, ArH);  $\delta_F$  (CDCl<sub>3</sub>, 376 MHz) -97.4 (1F, s, CF), -115.2 (1F, s, ArF);  $\delta_C$  (CDCl<sub>3</sub>, 100 MHz) 14.9 (d,  $^3J_{CF} = 2.9$  Hz, CH<sub>2</sub>), 29.0 (d,  $^2J_{CF} = 26.3$  Hz, CH<sub>2</sub>), 29.2 (CH<sub>2</sub>), 44.5 (d,  $^2J_{CF} = 26.7$  Hz, CH<sub>2</sub>), 115.4 (dd,  $^1J_{CF} = 227.2$  Hz,  $^6J_{CF} = 1.4$  Hz, C), 115.5 (d,  $^2J_{CF} = 21.3$  Hz, CH), 129.3 (dd,  $^3J_{CF} = 5.5$  Hz,  $^4J_{CF} = 3.4$  Hz, C), 132.1 (d,  $^3J_{CF} = 8.1$  Hz, CH), 162.4 (d,  $^1J_{CF} = 246.1$  Hz, C), 168.8 (d,  $^3J_{CF} = 1.4$  Hz, CO);  $m/z$  (ASAP) 207.0820 ((M-F)<sup>+</sup>. C<sub>12</sub>H<sub>12</sub>FO<sub>2</sub> requires 207.0821, 37%), 179.0876 ((4-FC<sub>6</sub>H<sub>4</sub>CH<sub>2</sub>COCH<sub>2</sub>CH<sub>2</sub>CH<sub>2</sub>)<sup>+</sup>, 100%).

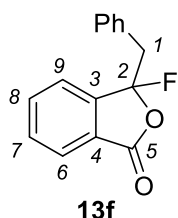

The crude product was purified by column chromatography (dichloromethane) to give 3-benzyl-3-fluoroisobenzofuran-1(3H)-one **13f** as a colourless oil (59 mg, 97%). The characterisation data was in agreement with the literature.<sup>6a</sup>  $\delta_H$  (CDCl<sub>3</sub>, 400 MHz) 3.52 (1H, dd,  $^2J_{HH} = 14.4$  Hz,  $^3J_{HF} = 14.3$  Hz, H<sub>1</sub>), 3.63 (1H, dd,  $^2J_{HH} = 14.4$  Hz,  $^3J_{HF} = 12.3$  Hz, H<sub>1'</sub>), 7.19-7.26 (5H, m, ArH), 7.34 (1H, d,  $^3J_{HH} = 7.5$  Hz, ArH), 7.59 (1H,

t,  $^3J_{HH} = 7.5$  Hz, ArH), 7.69 (1H, t,  $^3J_{HH} = 7.5$  Hz, ArH), 7.80 (1H, d,  $^3J_{HH} = 7.5$  Hz, ArH);  $\delta_F$  (CDCl<sub>3</sub>, 376 MHz) -100.6 (s);  $\delta_C$  (CDCl<sub>3</sub>, 100 MHz) 40.6 (d,  $^2J_{CF} = 28.2$  Hz, CH<sub>2</sub>), 113.4 (d,  $^1J_{CF} = 232.2$  Hz, C), 121.4 (CH), 124.0 (CH), 124.5 (C), 125.9 (CH), 126.7 (CH), 128.8 (CH), 129.8 (CH), 130.2 (d,  $^3J_{CF} = 4.5$  Hz, C), 132.9 (CH), 142.8 (d,  $^2J_{CF} = 21.2$  Hz, C), 164.8 (CO);  $m/z$  (ASAP) 223.0758 ((M-F)<sup>+</sup>. C<sub>15</sub>H<sub>11</sub>O<sub>2</sub> requires 223.0759, 100%), 195.0813 ((M-COF)<sup>+</sup>, 70%).

### A Scope of the intramolecular fluorolactonisation

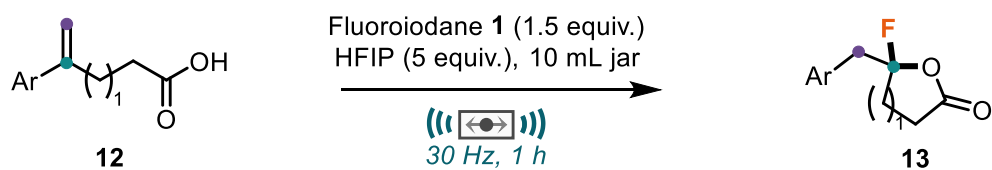

$\gamma$ -lactones;  $n = 1$

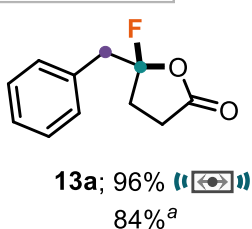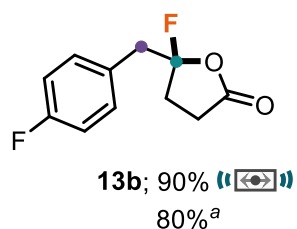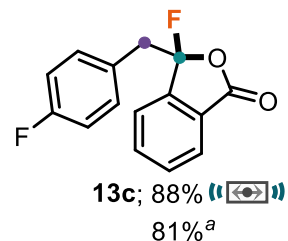

$\delta$ -lactones;  $n = 2$

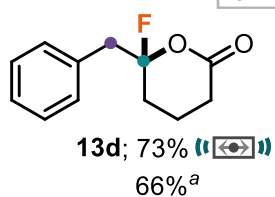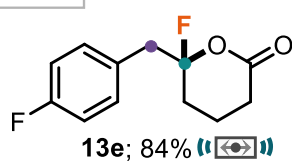

Isolated yields reported.  
<sup>a</sup> result taken from ref. 6b for solution conditions in HFIP at 40 °C for 1 h.

### B Divergent selectivity in the ball-mill by choice of fluorinating reagent

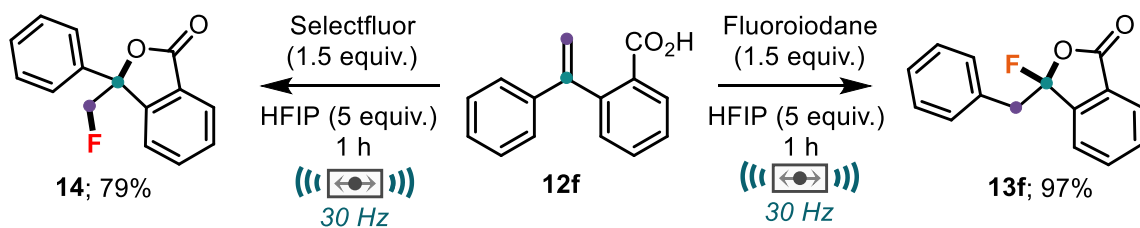

Selectfluor

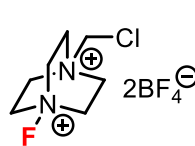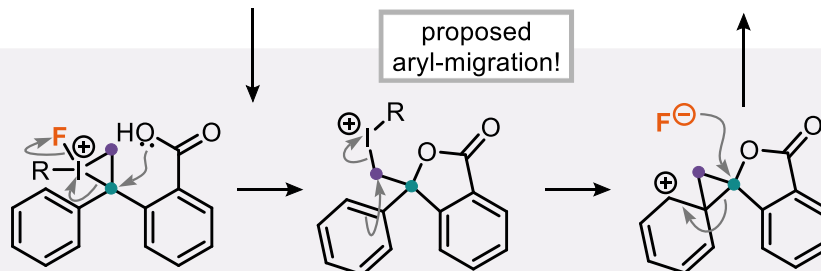

**Scheme S2** Intramolecular fluorolactonisations and switching of cyclisation selectivity

## Mechanochemical intramolecular fluorolactonisation of unsaturated carboxylic acid **12f** to **14** with Selectfluor

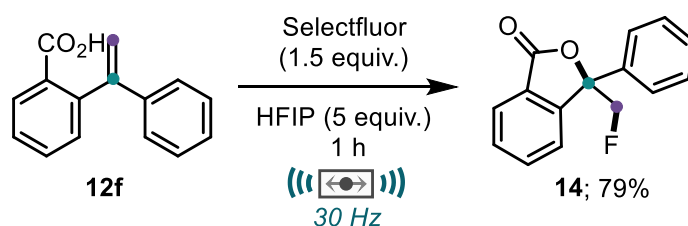

To a 10 mL stainless steel jar (Retsch) was added a 2.5 g stainless steel milling ball. Unsaturated carboxylic acid **12f** (0.056 g, 0.25 mmol), Selectfluor (0.1329 g, 0.375 mmol) and 1,1,1,3,3,3-hexafluoro-2-propanol (130  $\mu$ L, 1.25 mmol) were added under an air atmosphere. The milling jar was then screwed closed and milled at 30 Hz for 1 hour. After the desired reaction time, the mixture was transferred to a flask with  $\text{CHCl}_3$  (~2-5 mL). The reaction mixture was filtered to remove insoluble salts. The crude product was concentrated under reduced pressure and purified by flash column chromatography (5% EtOAc / hexane) to give 3-(fluoromethyl)-3-phenylisobenzofuran-1(3*H*)-one **14** as a white solid (48 mg, 79%). The characterisation data was in agreement with the literature.<sup>38</sup> mp 100-102  $^{\circ}\text{C}$  (lit.,<sup>39</sup> 103-105  $^{\circ}\text{C}$ ).  $\delta_{\text{H}}$  (500 MHz,  $\text{CDCl}_3$ ) 4.92 (1H, dd,  $^2J_{\text{HF}} = 47.0$ ,  $^2J_{\text{HH}} = 10.0$  Hz,  $\text{CH}_A\text{H}_B\text{Ph}$ ), 4.95 (1H, dd,  $^2J_{\text{HF}} = 47.0$ ,  $^2J_{\text{HH}} = 10.0$  Hz,  $\text{CH}_A\text{H}_B\text{Ph}$ ), 7.36 – 7.43 (3H, m, ArH), 7.54 – 7.62 (3H, m, ArH), 7.68 (1H, d,  $^3J_{\text{HH}} = 7.7$  Hz, ArH), 7.71 – 7.77 (1H, m, ArH), 7.95 (1H, d,  $^3J_{\text{HH}} = 7.7$  Hz, ArH).  $\delta_{\text{C}}$  (126 MHz,  $\text{CDCl}_3$ ) 84.9 (d,  $^1J_{\text{CF}} = 185.1$  Hz,  $\text{CH}_2$ ), 87.7 (d,  $^2J_{\text{CF}} = 19.6$  Hz, C), 123.1 (CH), 125.8 (CH), 126.3 (CH), 126.4 (C), 129.1 (CH), 129.3 (CH), 130.1 (CH), 134.5 (CH), 135.8 (d,  $^3J_{\text{CF}} = 3.0$  Hz, C), 148.6 (d,  $^3J_{\text{CF}} = 2.0$  Hz, C), 169.3 (CO).  $\delta_{\text{F}}$  (471 MHz,  $\text{CDCl}_3$ ) -222.0 (t,  $^2J_{\text{HF}} = 47.0$  Hz,  $\text{CH}_2\text{F}$ ).  $m/z$  (ESI) 243.0833 ( $\text{MH}^+$ ,  $\text{C}_{15}\text{H}_{12}\text{FO}_2$  requires 243.0821).

### Structure solution and refinement

Tables S6 and S7 summarise the crystallographic data for fluorinated tetrahydropyridazines **3a**, **3c**, **3h** and **3j**, and fluorinated dihydrooxazines **7c** and **7d**. The data for the compounds were collected on a Bruker APEX 2000 CCD diffractometer using graphite monochromated Mo- $\text{K}\alpha$  radiation ( $\lambda = 0.71073$   $\text{\AA}$ ). The data were corrected for Lorentz and polarization effects, and empirical absorption corrections were applied. The structures were solved by direct methods and refined by full-matrix least squares cycles on  $F^2$  for all data, using SHELXTL version 6.10.<sup>40</sup> All hydrogen atoms were included in calculated positions (C-H = 0.95-0.99  $\text{\AA}$ ) riding on the bonded atom with isotropic displacement parameters set to 1.5 Ueq(C) for methyl H atoms and 1.2 Ueq(C) for all other H atoms. All non-hydrogen atoms were refined with anisotropic displacement parameters. Crystallographic data (excluding structure factors) for the structures reported in this paper have been deposited with

the Cambridge Crystallographic Data Centre and allocated the deposition numbers CCDC: 2083051-2083056. Copies of the data can be obtained free of charge from the Cambridge Crystallographic Data Centre via [www.ccdc.cam.ac.uk/data\\_request/cif](http://www.ccdc.cam.ac.uk/data_request/cif).

## References

12. J. Wang, X. Jia, T. Meng, L. Xin, *Synthesis*, 2005, **17**, 2838-2844.
13. M. Cai, Y. Huang, H. Zhao, R. Zhang, *J. Organomet. Chem.*, 2004, **689**, 2436-2440.
14. W. V. Kandur, K. J. Richert, C. J. Rieder, A. M. Thomas, C. Hu, J. W. Ziller, K. A. Woerpel, *Org. Lett.*, 2014, **16**, 2650-2653.
15. T. Imai, S. Nishida, *Synthesis*, 1993, **4**, 395-399.
16. H. Zhao, J. Peng, R. Xiao, W. Hao, M. Cai, *J. Organomet. Chem.*, 2011, **696**, 2030-2034.
17. M. Nakajima, S. Kotani, T. Ishizuka, S. Hashimoto, *Tetrahedron Lett.*, 2005, **46**, 157-159.
18. S. Samanta, H. Mohapatra, R. Jana, J. K. Ray, *Tetrahedron Lett.*, 2008, **49**, 7153-7156.
19. R. Dran, T. Prange, *C. R. Hebd. Seances Acad. Sci. Ser. C*, 1966, **262**, 492.
20. Y. Ueki, H. Ito, I. Usui, B. Breit, *Chem. Eur. J.*, 2011, **17**, 8555-8558.
21. M. Sai, H. Yorimitsu, K. Oshima, *Angew. Chem. Int. Ed.*, 2011, **50**, 3294-3298.
22. M. Cai, Y. Huang, H. Zhao, R. Zhang, *J. Organomet. Chem.*, 2004, **689**, 2436-2440.
23. K. Miura, D. Wang, A. Hosomi, *J. Am. Chem. Soc.*, 2005, **127**, 9366-9367.
24. C. H. Heathcock, S. Kiyooka, T. A. Blumenkopf, *J. Org. Chem.*, 1984, **49**, 4215-4223.
25. M. Mahlau, P. Garcia-Garcia, B. List, *Chem. Eur. J.*, 2012, **18**, 16283-16287.
26. L. A. Paquette, M. J. Earle, G. F. Smith, *Org. Synth.* 1996, **73**, 132-135.
27. Y. Chen, M. Zhu, T. Loh, *Org. Lett.*, 2015, **17**, 2712-2715.
28. R. D. Rieke, W. R. Klein, T. C. Wu, *J. Org. Chem.*, 1993, **58**, 2492-2500.
29. M. Moss, X. Han, J. M. Ready, *Angew Chem. Int. Ed.*, **2016**, **55**, 10017-10021.
30. S. Inaba, R. D. Rieke, *J. Org. Chem.*, 1985, **50**, 1373-1381.
31. L. Pascal, *Comptes Rendus des Seances de l'Academie des Sciences, Serie C: Sciences Chimiques*, 1969, **268**, 1177.
32. X. Hu, J. Chen, Q. Wei, F. Liu, Q. Deng, Y. Zou, W. Xiao, *Eur. J. Org. Chem.*, 2014, **15**, 3082-3086.
33. X. Hu, X. Q. J. Chen, Q. Wei, Q. Zhao, Y. Lan, W. Xiao, *Nat. Commun.*, 2016, **7**, 11188.
34. G. A. Marriner, S. A. Garner, H. Jang, M. J. Krische, *J. Org. Chem.*, 2004, **69**, 1380-1382.
35. D. Jiang, J. Peng, Y. Chen, *Org. Lett.*, 2008, **10**, 1695-1698.
36. M. Zhu, J. Zhao, T. Loh, *J. Am. Chem. Soc.*, 2010, **132**, 6284-6285.

37. R. Zimmer, H. Reissig, *Angew. Chem. Int. Ed.*, 1988, **27**, 1518-1519.
38. H. Egami, J. Asada, K. Sato, D. Hashizume, Y. Kawato and Y. Hamashima, *J. Am. Chem. Soc.*, 2015, **137**, 10132-10135.
39. J.-F. Zhao, X.-H. Duan, H. Yang and L.-N. Guo, *J. Org. Chem.*, 2015, **80**, 11149-11155.
40. G. M. Sheldrick, SHELXTL Version 6.10, Bruker AXS, Inc., Maddison, Wisconsin, USA, 2000.

**Table S7.** Crystallographic data for tetrahydropyridazines **3a** (R = 4-C<sub>6</sub>H<sub>4</sub>Cl), **3c** (R = Ph), **3h** (R = 2-thienyl) and **3j** (R = CH(CH<sub>3</sub>)<sub>2</sub>).

|                                             | <b>3a</b><br>(R = 4-C <sub>6</sub> H <sub>4</sub> Cl)              | <b>3c</b><br>(R = Ph)                                            | <b>3h</b><br>(R = 2-thienyl)                                                  | <b>3j</b><br>(R = CH(CH <sub>3</sub> ) <sub>2</sub> )            |
|---------------------------------------------|--------------------------------------------------------------------|------------------------------------------------------------------|-------------------------------------------------------------------------------|------------------------------------------------------------------|
| Formula                                     | C <sub>18</sub> H <sub>18</sub> ClFN <sub>2</sub> O <sub>2</sub> S | C <sub>18</sub> H <sub>19</sub> FN <sub>2</sub> O <sub>2</sub> S | C <sub>16</sub> H <sub>17</sub> FN <sub>2</sub> O <sub>2</sub> S <sub>2</sub> | C <sub>15</sub> H <sub>21</sub> FN <sub>2</sub> O <sub>2</sub> S |
| Formula weight                              | 380.85                                                             | 346.41                                                           | 352.44                                                                        | 312.40                                                           |
| Crystal system                              | Monoclinic                                                         | Orthorhombic                                                     | Trigonal                                                                      | Orthorhombic                                                     |
| Space group                                 | P2(1)/n                                                            | Pbca                                                             | R-3                                                                           | P2(1)2(1)2(1)                                                    |
| Unit cell dimensions                        |                                                                    |                                                                  |                                                                               |                                                                  |
| <i>a</i> (Å)                                | 11.028(3)                                                          | 18.644(4)                                                        | 20.185(3)                                                                     | 8.315(3)                                                         |
| <i>b</i> (Å)                                | 9.215(3)                                                           | 9.1535(18)                                                       | 20.185(3)                                                                     | 11.835(5)                                                        |
| <i>c</i> (Å)                                | 17.393 (5)                                                         | 20.027(4)                                                        | 21.625(5)                                                                     | 16.239(6)                                                        |
| $\alpha$ (°)                                | 90                                                                 | 90                                                               | 90                                                                            | 90                                                               |
| $\beta$ (°)                                 | 98.322(5)                                                          | 90                                                               | 90                                                                            | 90                                                               |
| $\gamma$ (°)                                | 90                                                                 | 90                                                               | 120                                                                           | 90                                                               |
| <i>U</i> (Å <sup>3</sup> )                  | 1748.9(9)                                                          | 3417.7(11)                                                       | 7630(2)                                                                       | 1598.0(11)                                                       |
| Temperature (K)                             | 150(2)                                                             | 150(2)                                                           | 150(2)                                                                        | 150(2)                                                           |
| <i>Z</i>                                    | 4                                                                  | 8                                                                | 18                                                                            | 4                                                                |
| <i>D</i> <sub>c</sub> (Mg m <sup>-3</sup> ) | 1.446                                                              | 1.346                                                            | 1.381                                                                         | 1.298                                                            |
| $\mu$ (Mo-K $\alpha$ ) (mm <sup>-1</sup> )  | 0.362                                                              | 0.212                                                            | 0.334                                                                         | 0.219                                                            |
| <i>F</i> (000)                              | 792                                                                | 1456                                                             | 3312                                                                          | 664                                                              |
| Dimensions (mm <sup>3</sup> )               | 0.48 x 0.37 x 0.25                                                 | 0.38 x 0.15 x 0.11                                               | 0.35 x 0.18 x 0.14                                                            | 0.43 x 0.31 x 0.20                                               |
| Data collection range (°)                   | 2.06 – 26.00                                                       | 2.03 – 26.00                                                     | 2.02 – 26.00                                                                  | 2.13 – 26.00                                                     |

|                                                        |                |                |                |                |
|--------------------------------------------------------|----------------|----------------|----------------|----------------|
| Index ranges                                           | -13 ≤ h ≤ 13   | -22 ≤ h ≤ 22   | -24 ≤ h ≤ 24   | -10 ≤ h ≤ 10   |
|                                                        | -11 ≤ k ≤ 11   | -11 ≤ k ≤ 11   | -24 ≤ k ≤ 24   | -14 ≤ k ≤ 14   |
|                                                        | -21 ≤ l ≤ 21   | -24 ≤ l ≤ 24   | -26 ≤ l ≤ 26   | -20 ≤ l ≤ 20   |
| Reflections                                            | 13028          | 24963          | 19944          | 12402          |
| Unique reflections ( $R_{\text{int}}$ )                | 3445 (0.0471)  | 3361 (0.1007)  | 3323 (0.0973)  | 3140 (0.0625)  |
| $\theta_{\text{max}}$ (% complete)                     | 26.00 (99.8)   | 26.00 (100.0)  | 26.00 (99.9)   | 26.00 (100.0)  |
| Absorption correction                                  | Empirical      | Empirical      | Empirical      | Empirical      |
| Max/min transmission                                   | 0.914 / 0.717  | 0.914 / 0.726  | 0.901 / 0.580  | 0.875 / 0.572  |
| Data/restraints/parameters                             | 3445 / 0 / 228 | 3361 / 0 / 219 | 3323 / 0 / 210 | 3140 / 0 / 195 |
| Goodness of fit on $F^2$                               | 1.039          | 0.958          | 0.974          | 1.072          |
| Final $R$ indices [ $I > 2\sigma(I)$ ]                 |                |                |                |                |
| $R_1$                                                  | 0.0433         | 0.0511         | 0.0546         | 0.0497         |
| $wR_2$                                                 | 0.1041         | 0.1004         | 0.1106         | 0.1054         |
| R indices (all data)                                   |                |                |                |                |
| $R_1$                                                  | 0.0515         | 0.0859         | 0.0934         | 0.0607         |
| $wR_2$                                                 | 0.1081         | 0.1105         | 0.1225         | 0.1100         |
| Largest diff. peak, hole ( $\text{e}\text{\AA}^{-3}$ ) | 0.706, -0.259  | 0.288, -0.312  | 0.338, -0.273  | 0.258, -0.182  |

**Table S8** Crystallographic data for dihydrooxazines **7c** (R = 4-C<sub>6</sub>H<sub>4</sub>CH<sub>3</sub>) and **7d** (R = 4-C<sub>6</sub>H<sub>4</sub>Cl).

|                                                              | <b>7c</b>                                                         | <b>7d</b>                                                         |
|--------------------------------------------------------------|-------------------------------------------------------------------|-------------------------------------------------------------------|
|                                                              | R = 4-C <sub>6</sub> H <sub>4</sub> CH <sub>3</sub>               | R = 4-C <sub>6</sub> H <sub>4</sub> Cl                            |
| Formula                                                      | C <sub>12</sub> H <sub>14</sub> FNO                               | C <sub>11</sub> H <sub>11</sub> ClFNO                             |
| Formula weight                                               | 207.24                                                            | 227.66                                                            |
| Crystal system                                               | Orthorhombic                                                      | Orthorhombic                                                      |
| Space group                                                  | Pbca                                                              | Pbca                                                              |
| Unit cell dimensions                                         |                                                                   |                                                                   |
| <i>a</i> (Å)                                                 | 9.348(5)                                                          | 9.503(6)                                                          |
| <i>b</i> (Å)                                                 | 8.856(5)                                                          | 9.161(6)                                                          |
| <i>c</i> (Å)                                                 | 25.174(13)                                                        | 24.001(15)                                                        |
| $\alpha$ (°)                                                 | 90                                                                | 90                                                                |
| $\beta$ (°)                                                  | 90                                                                | 90                                                                |
| $\gamma$ (°)                                                 | 90                                                                | 90                                                                |
| <i>U</i> (Å <sup>3</sup> )                                   | 2084.1(18)                                                        | 2090(2)                                                           |
| Temperature (K)                                              | 150(2)                                                            | 150(2)                                                            |
| <i>Z</i>                                                     | 8                                                                 | 8                                                                 |
| <i>D<sub>c</sub></i> (Mg m <sup>-3</sup> )                   | 1.321                                                             | 1.447                                                             |
| $\mu$ (Mo-K $\alpha$ ) (mm <sup>-1</sup> )                   | 0.096                                                             | 0.350                                                             |
| <i>F</i> (000)                                               | 880                                                               | 944                                                               |
| Dimensions (mm <sup>3</sup> )                                | 0.48 x 0.43 x 0.05                                                | 0.45 x 0.28 x 0.04                                                |
| Data collection range (°)                                    | 1.62 – 25.99                                                      | 1.70 – 25.97                                                      |
| Index ranges                                                 | -11 ≤ <i>h</i> ≤ 11<br>-10 ≤ <i>k</i> ≤ 10<br>-30 ≤ <i>l</i> ≤ 31 | -11 ≤ <i>h</i> ≤ 11<br>-11 ≤ <i>k</i> ≤ 11<br>-29 ≤ <i>l</i> ≤ 29 |
| Reflections                                                  | 14961                                                             | 15005                                                             |
| Unique reflections ( <i>R</i> <sub>int</sub> )               | 2047 (0.1179)                                                     | 2049 (0.1739)                                                     |
| $\theta$ <sub>max</sub> (% complete)                         | 25.99 (100.0)                                                     | 25.97 (100.0)                                                     |
| Absorption correction                                        | Empirical                                                         | Empirical                                                         |
| Max/min transmission                                         | 0.983 / 0.301                                                     | 0.942 / 0.163                                                     |
| Data/restraints/parameters                                   | 2047 / 0 / 138                                                    | 2049 / 0 / 137                                                    |
| Goodness of fit on <i>F</i> <sup>2</sup>                     | 0.990                                                             | 1.037                                                             |
| Final <i>R</i> indices [ <i>I</i> > 2 $\sigma$ ( <i>I</i> )] |                                                                   |                                                                   |
| <i>R</i> <sub>1</sub>                                        | 0.0594                                                            | 0.0865                                                            |
| <i>wR</i> <sub>2</sub>                                       | 0.1462                                                            | 0.1974                                                            |
| <i>R</i> indices (all data)                                  |                                                                   |                                                                   |
| <i>R</i> <sub>1</sub>                                        | 0.0783                                                            | 0.1401                                                            |
| <i>wR</i> <sub>2</sub>                                       | 0.1565                                                            | 0.2267                                                            |
| Largest diff. peak, hole (eÅ <sup>-3</sup> )                 | 0.341, -0.376                                                     | 0.768, -0.421                                                     |



# <sup>1</sup>H NMR Spectrum

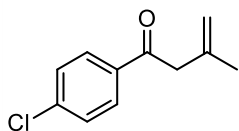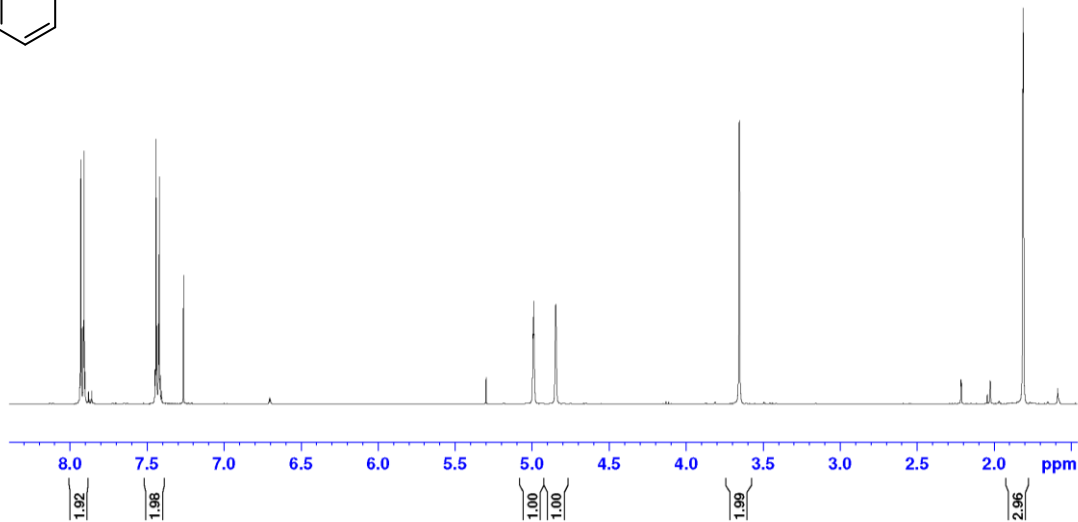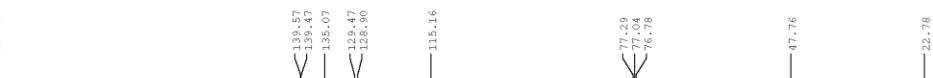

# <sup>13</sup>C NMR Spectrum

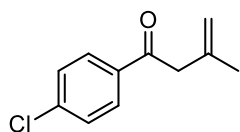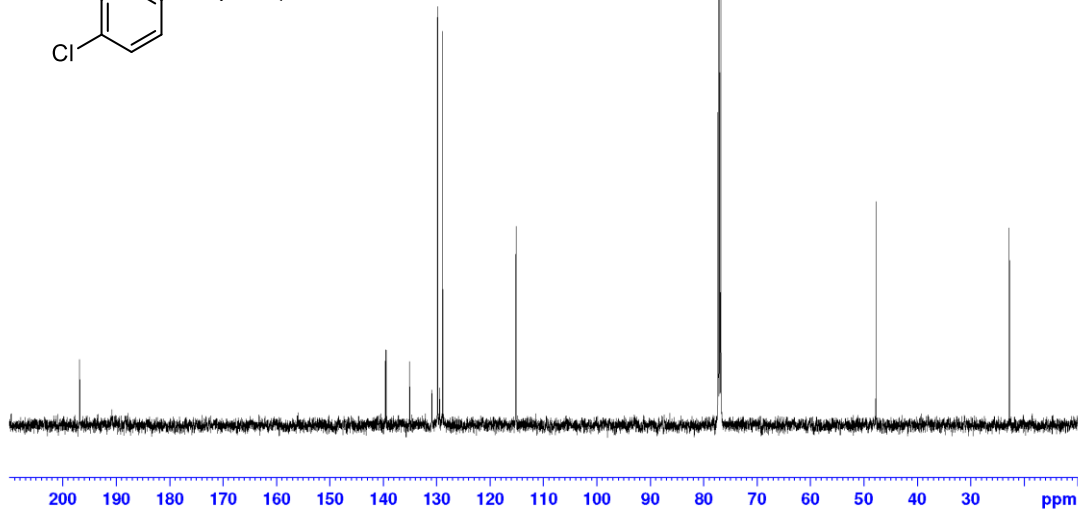

# <sup>1</sup>H NMR Spectrum

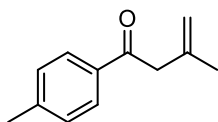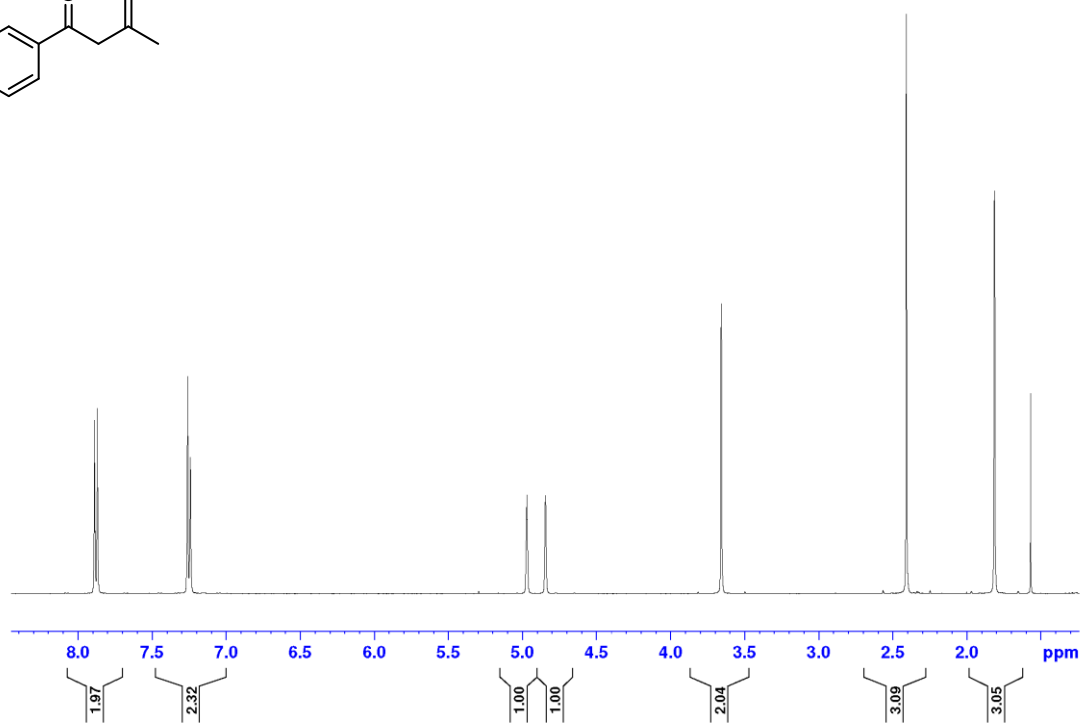

# <sup>13</sup>C NMR Spectrum

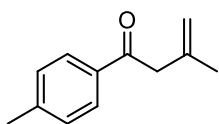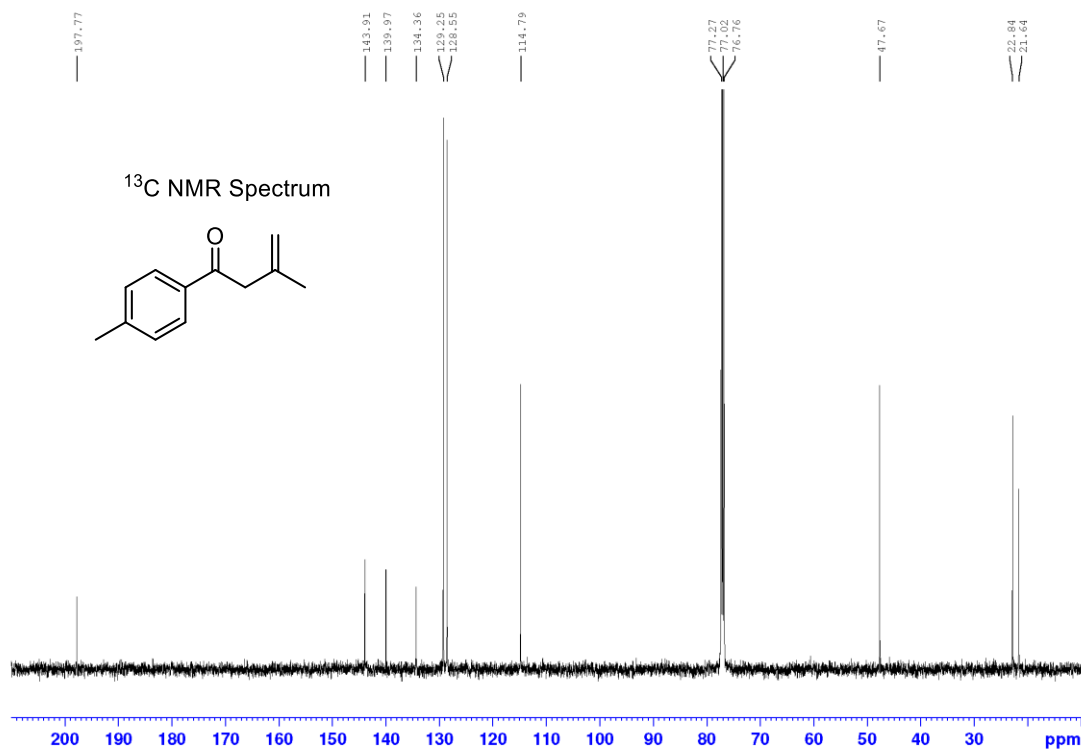

<sup>1</sup>H NMR Spectrum

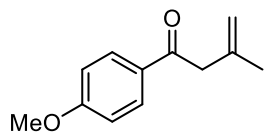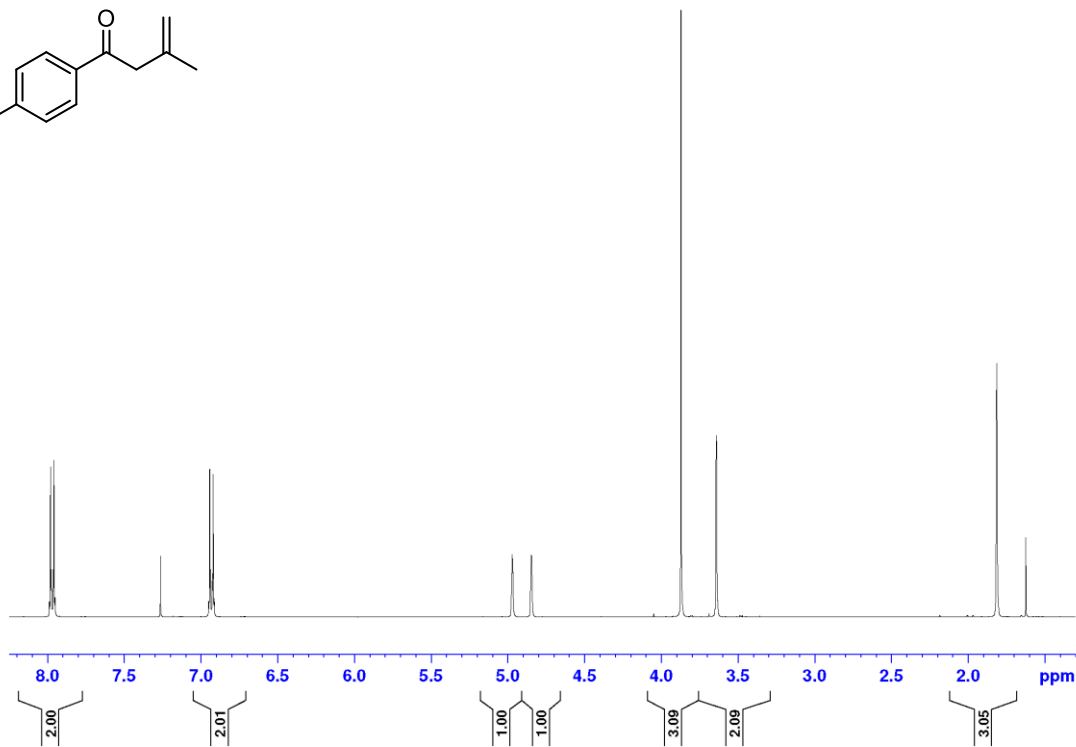

196.72  
163.50  
140.17  
130.75  
129.89  
114.69  
113.70  
77.59  
77.04  
76.79  
55.48  
47.57  
22.85

<sup>13</sup>C NMR Spectrum

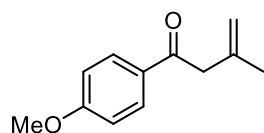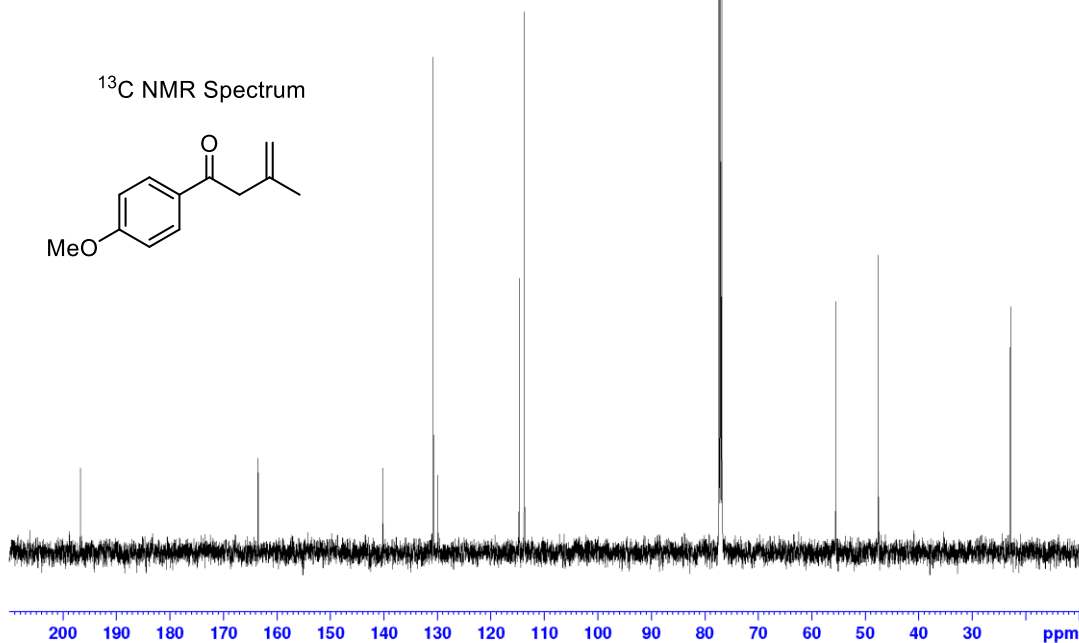

# <sup>1</sup>H NMR Spectrum

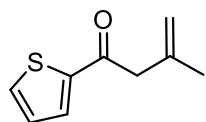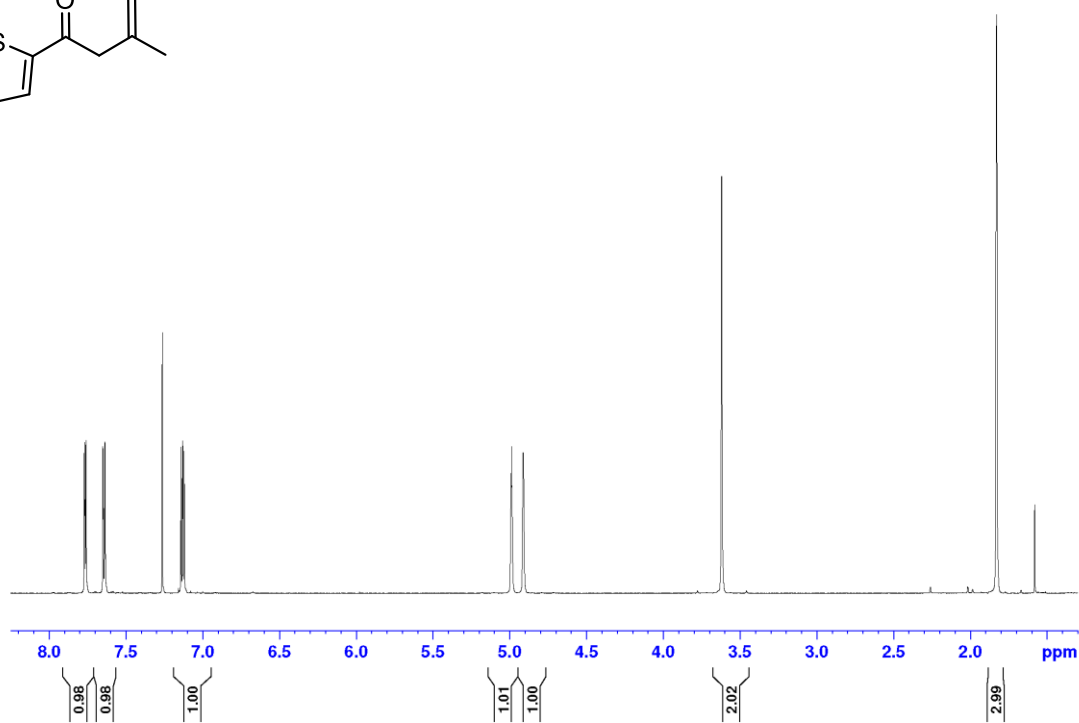

# <sup>13</sup>C NMR Spectrum

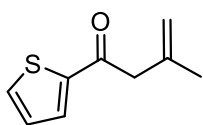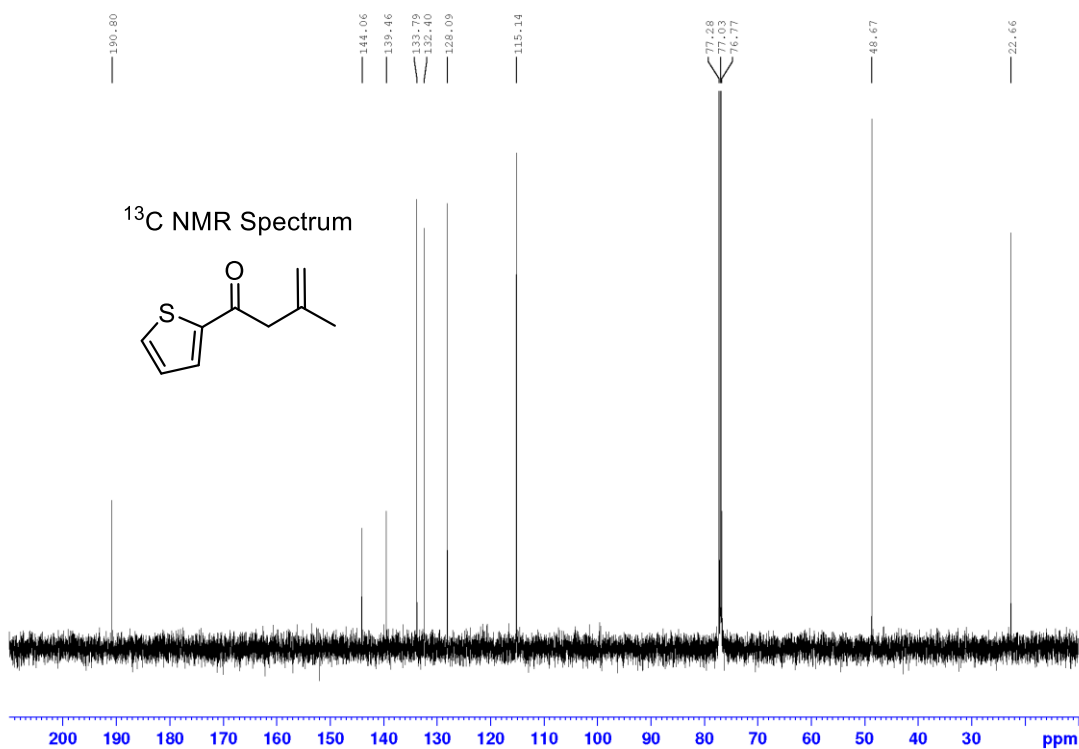

# <sup>1</sup>H NMR Spectrum

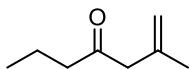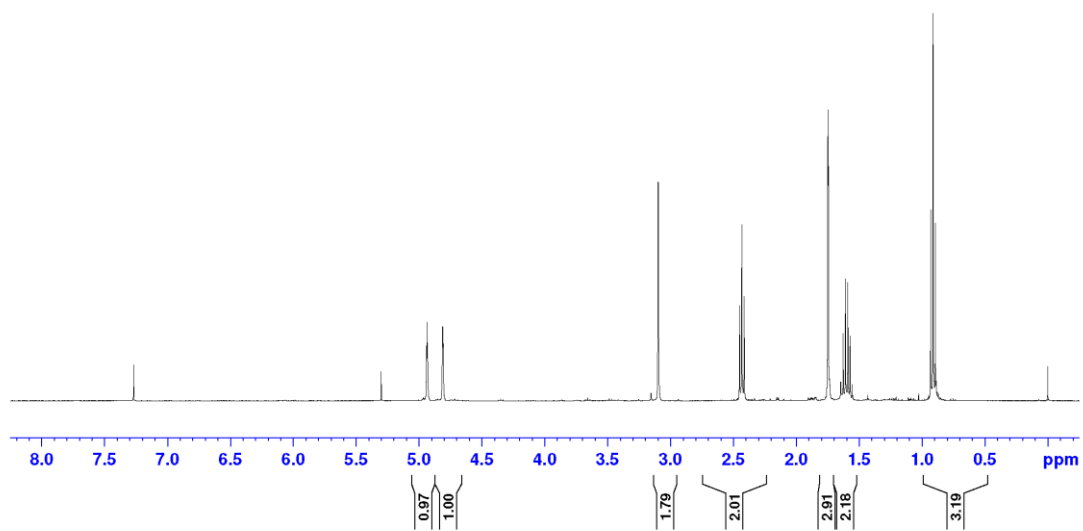

# <sup>13</sup>C NMR Spectrum

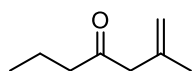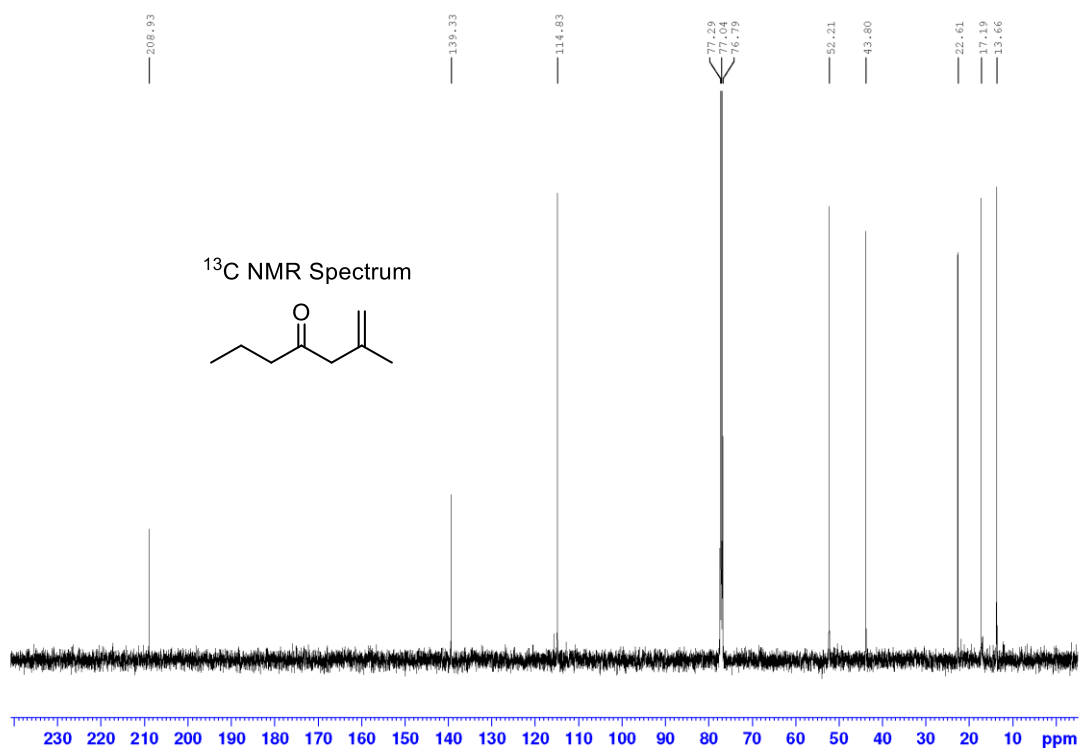

<sup>1</sup>H NMR Spectrum

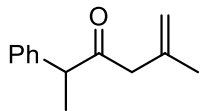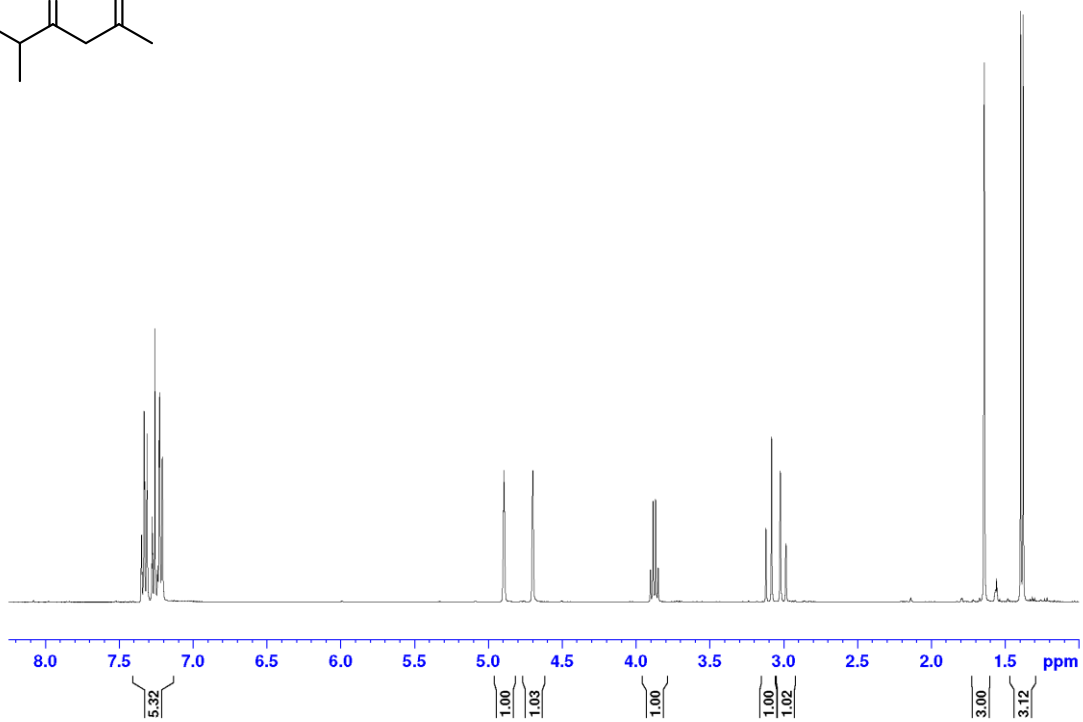

<sup>13</sup>C NMR Spectrum

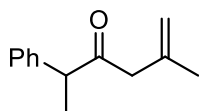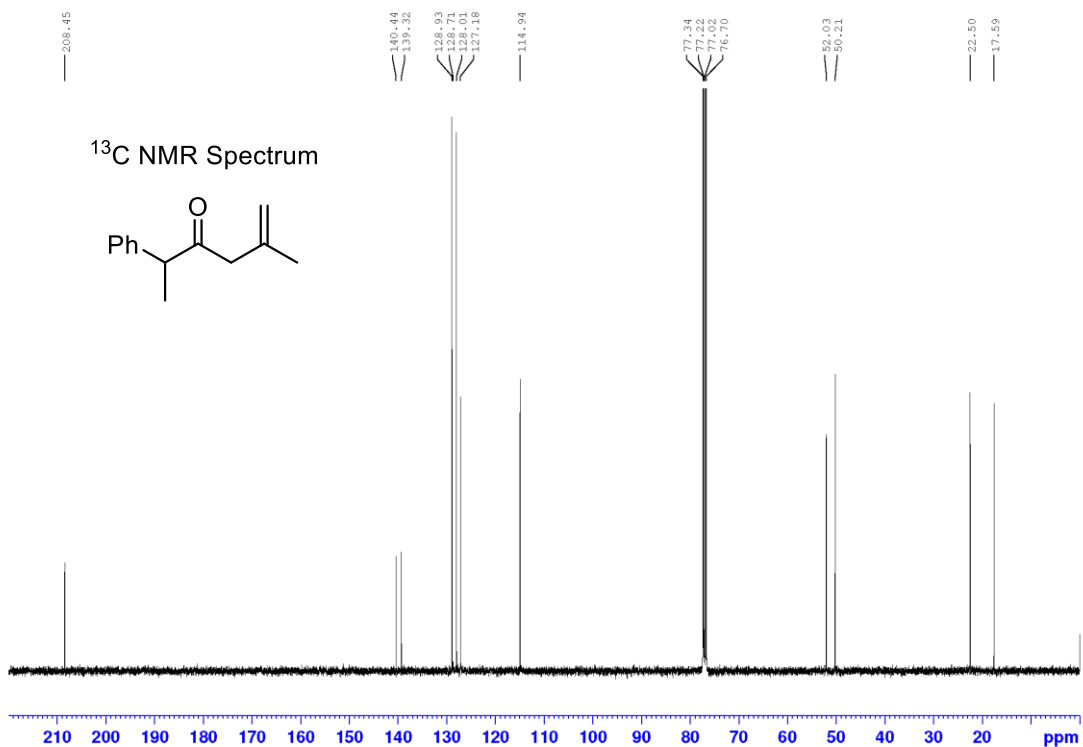

# <sup>1</sup>H NMR Spectrum

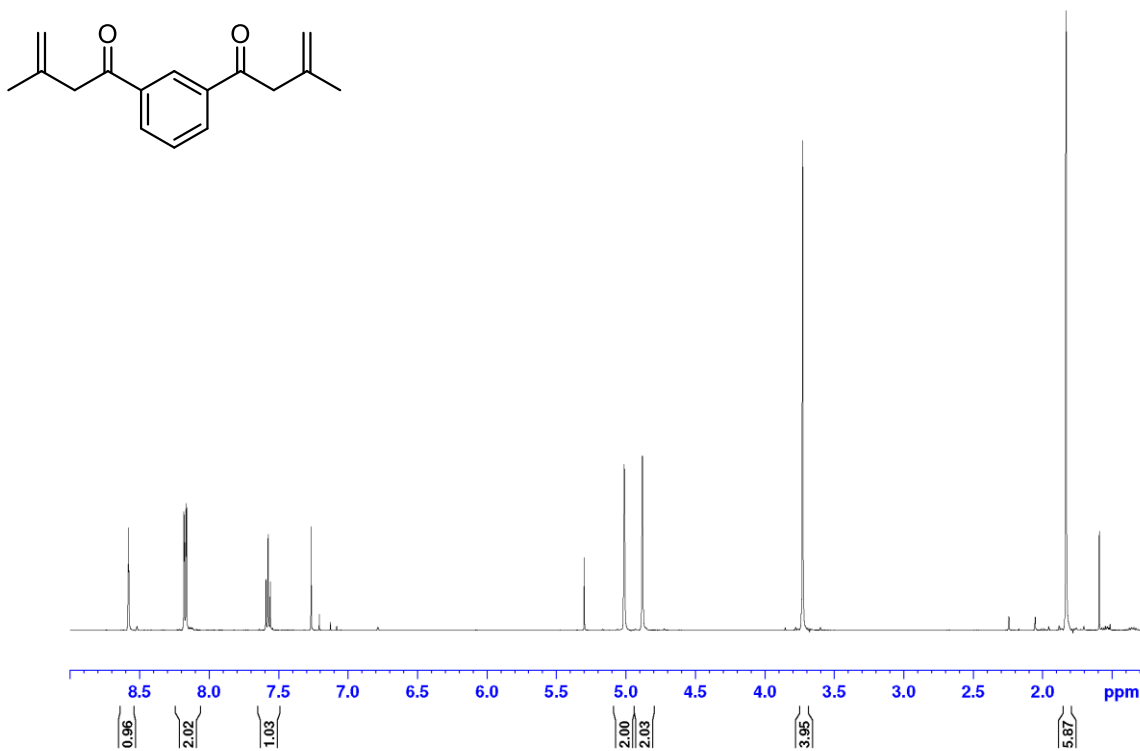

# <sup>13</sup>C NMR Spectrum

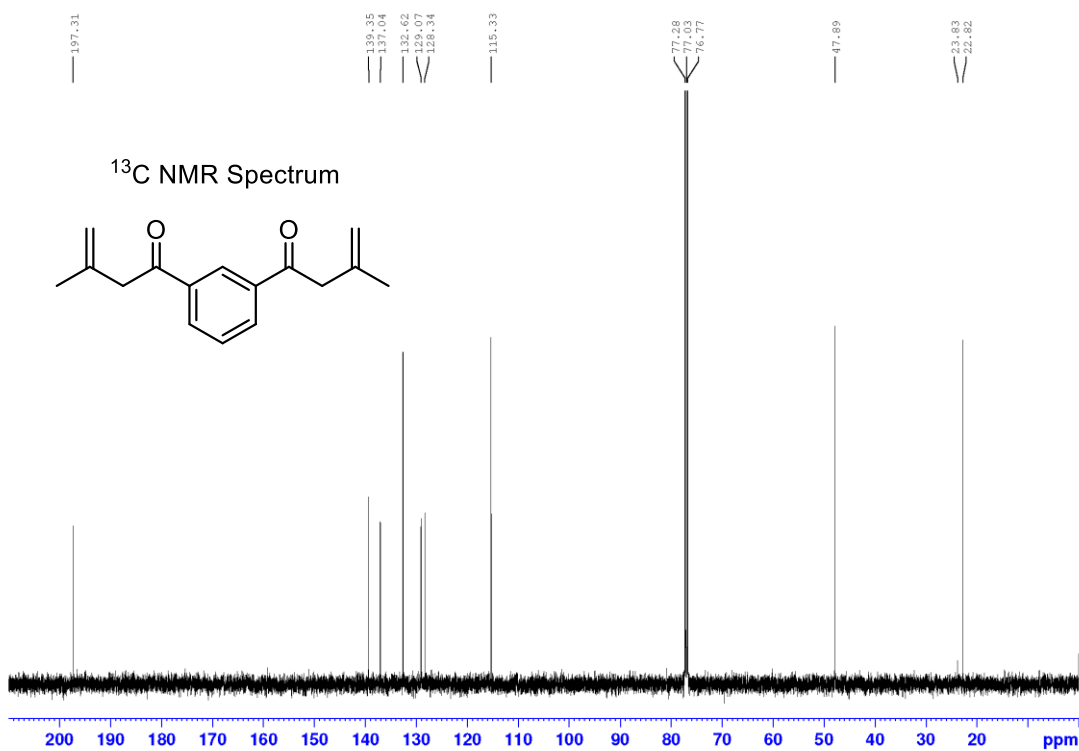

<sup>1</sup>H NMR Spectrum

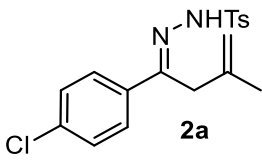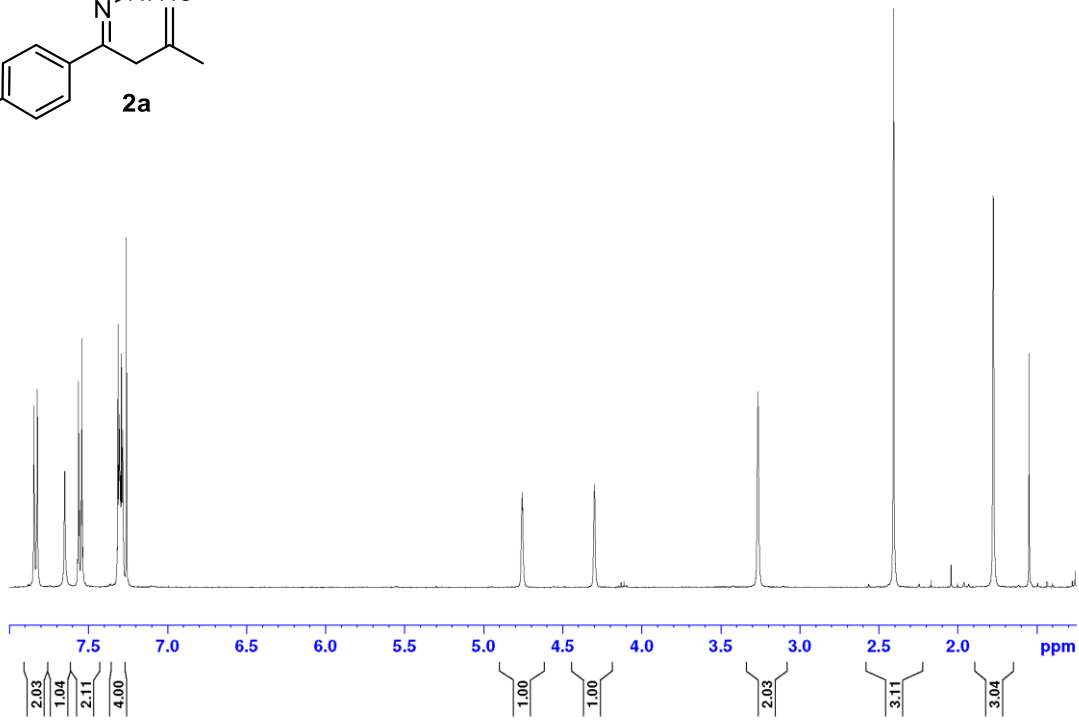

<sup>13</sup>C NMR Spectrum

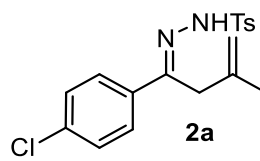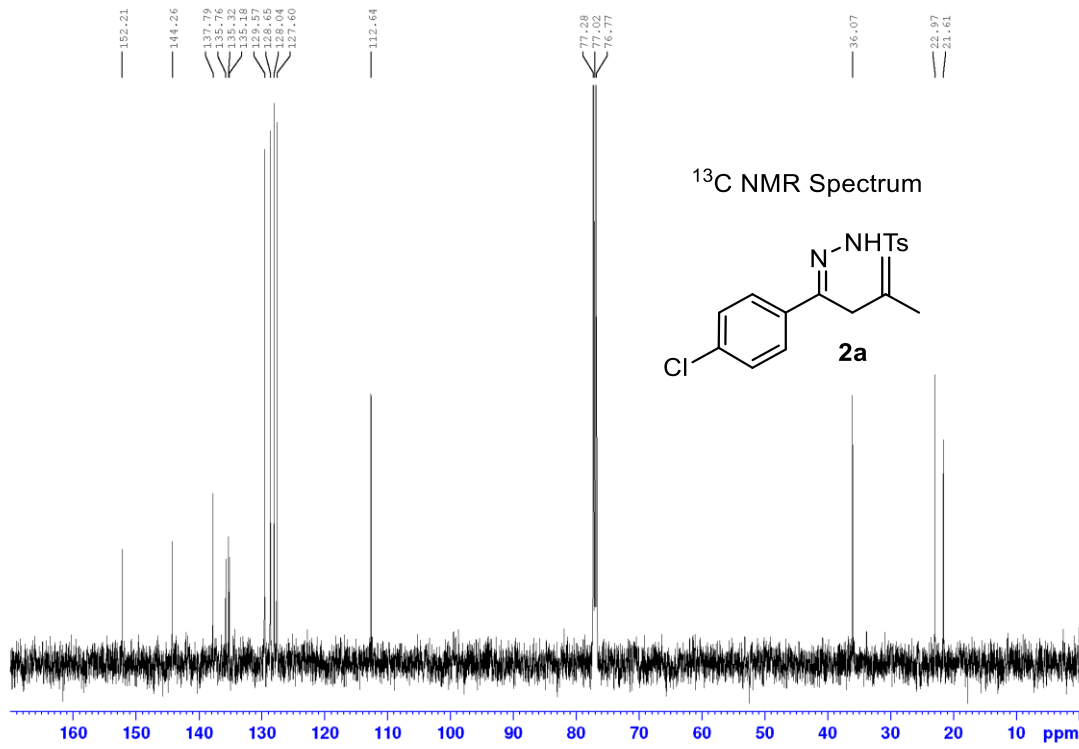



# <sup>1</sup>H NMR Spectrum

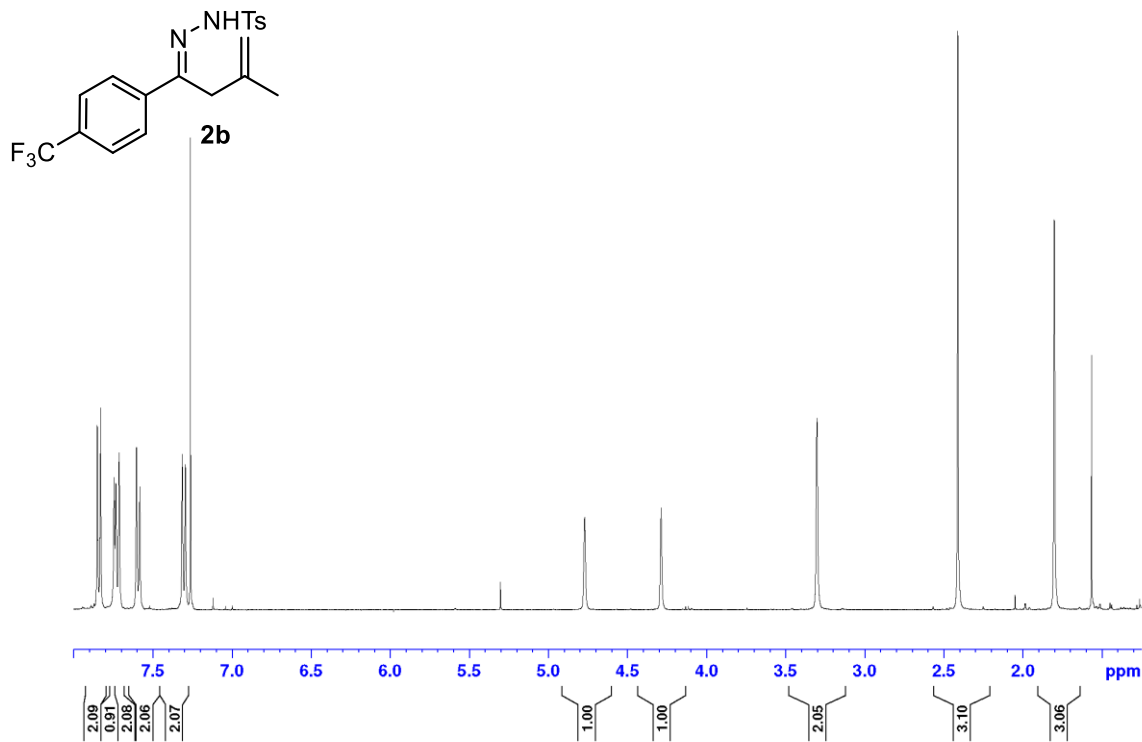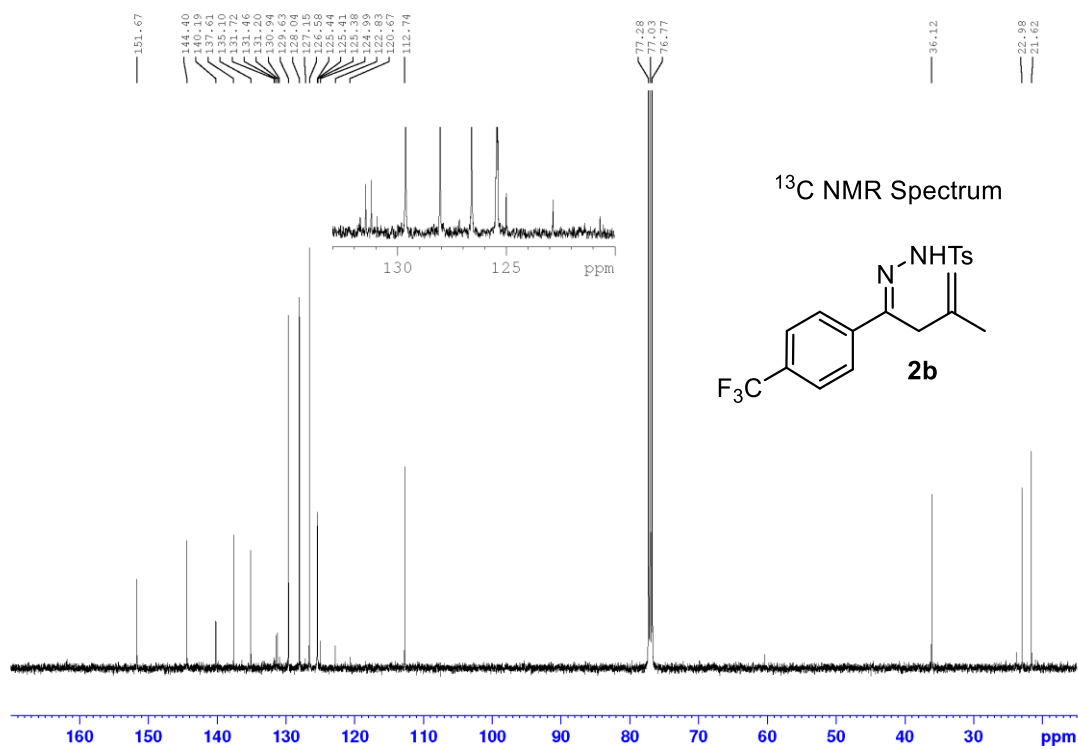

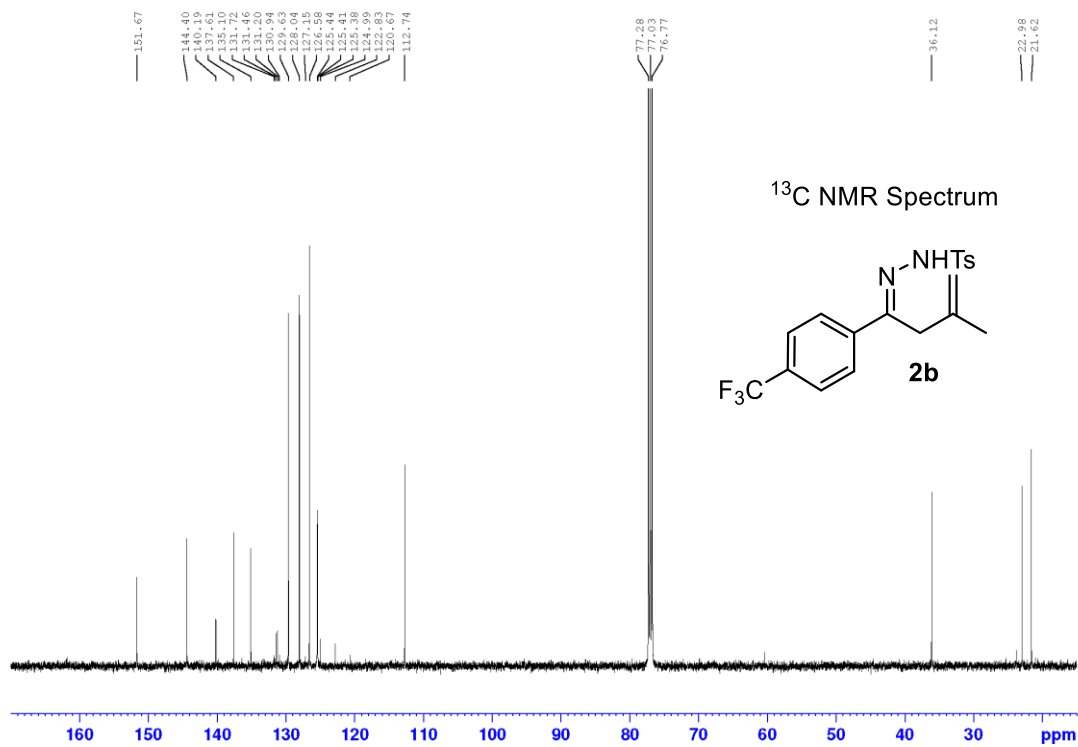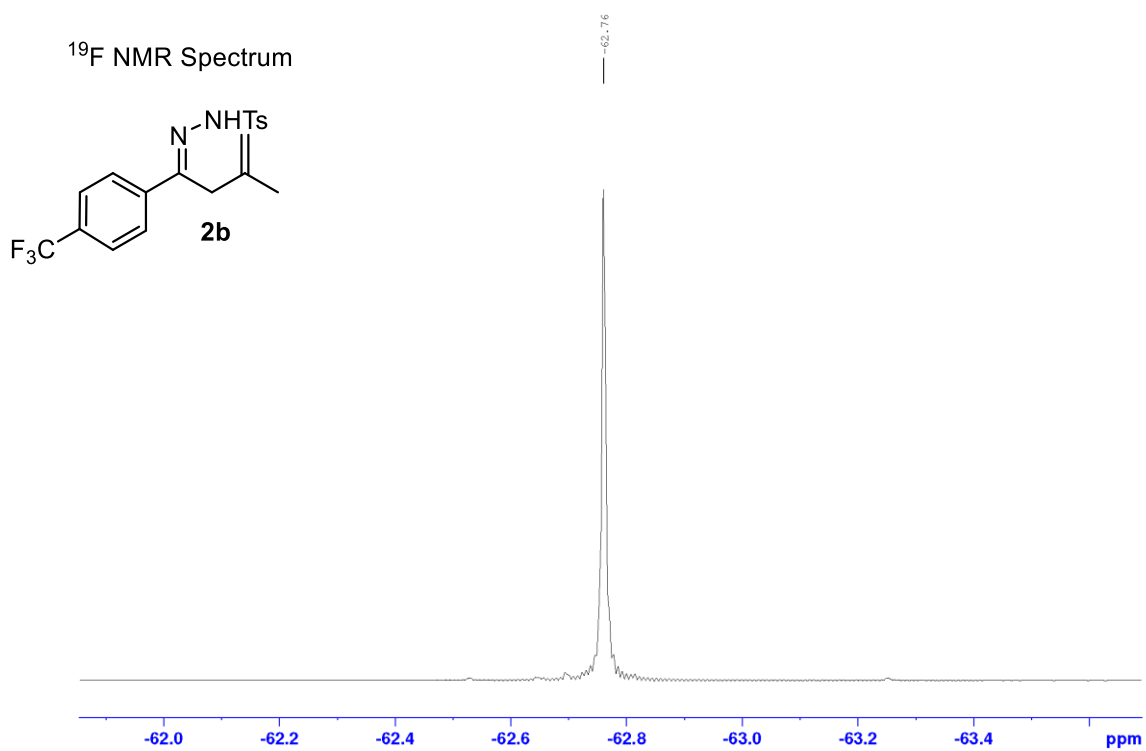

# <sup>1</sup>H NMR Spectrum

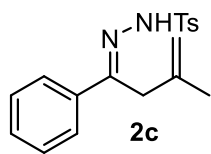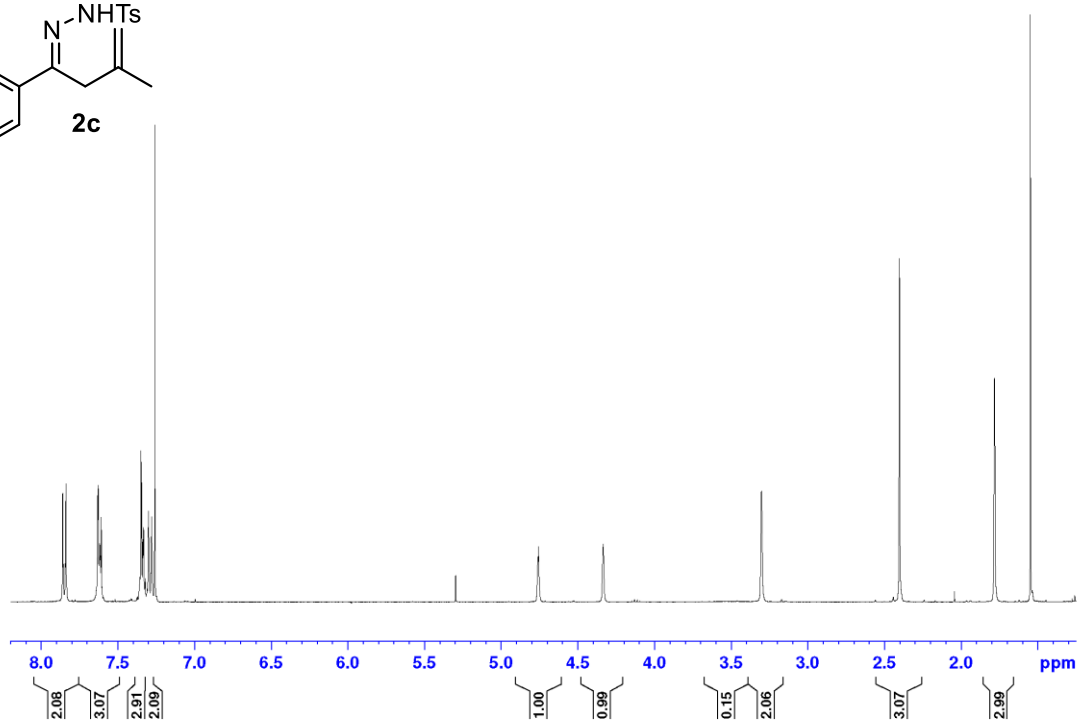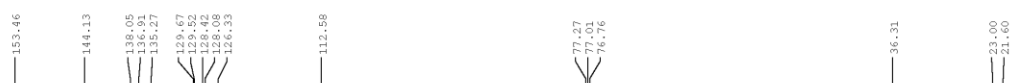

# <sup>13</sup>C NMR Spectrum

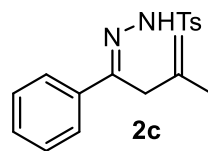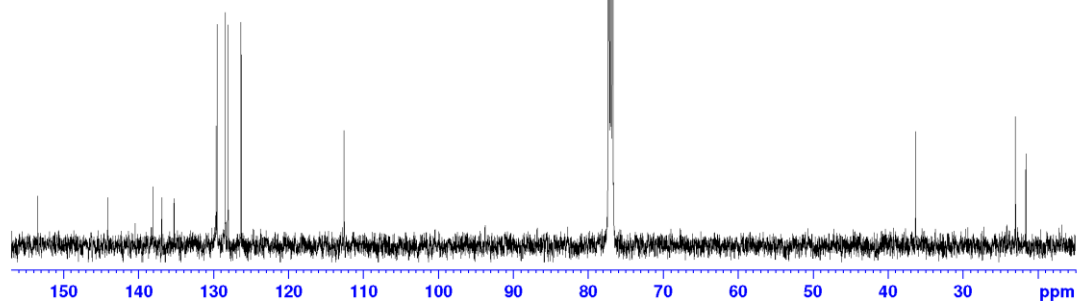

# <sup>1</sup>H NMR Spectrum

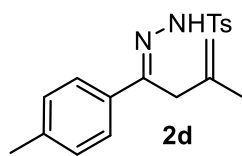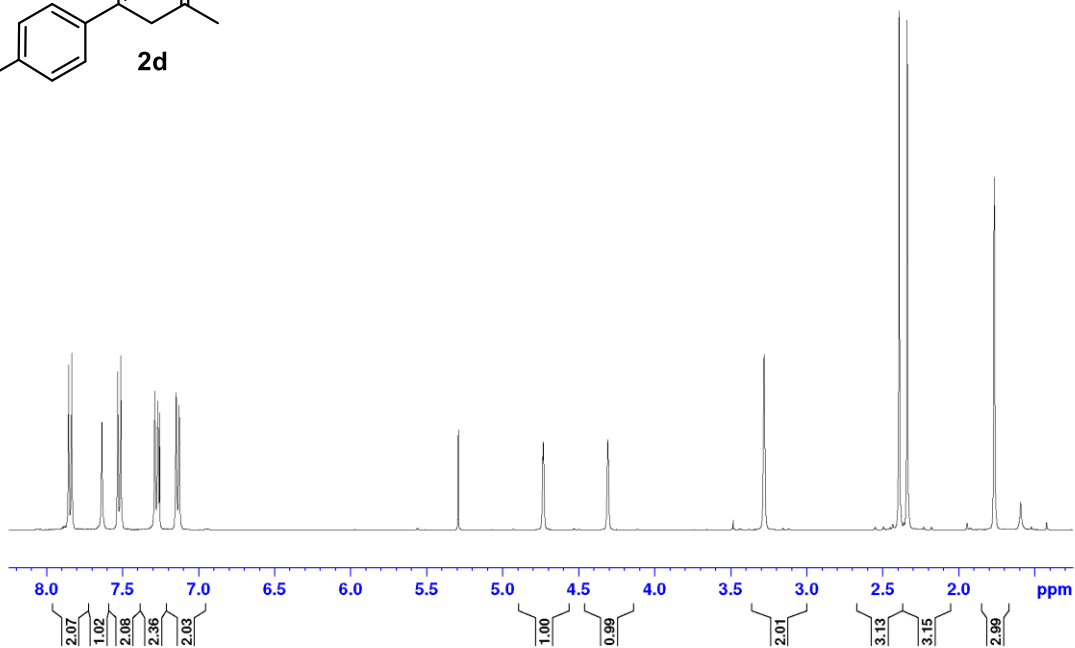

# <sup>13</sup>C NMR Spectrum

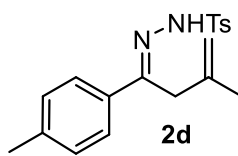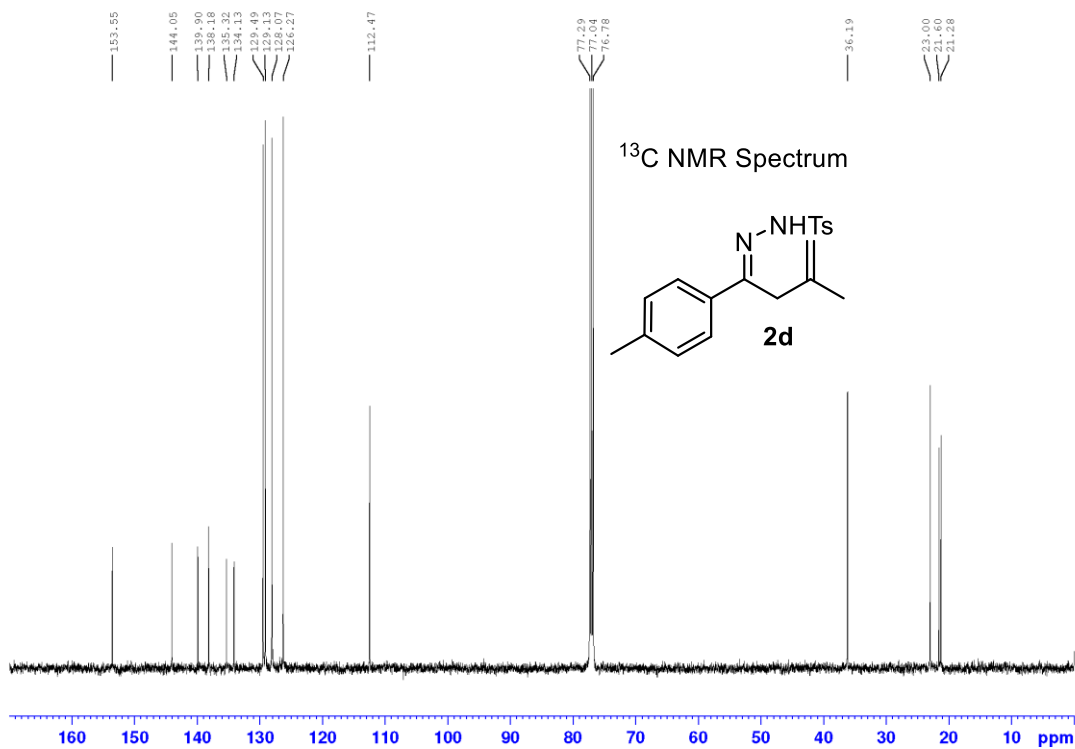

<sup>1</sup>H NMR Spectrum

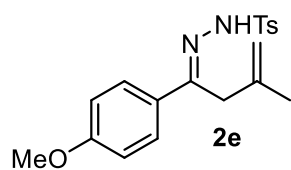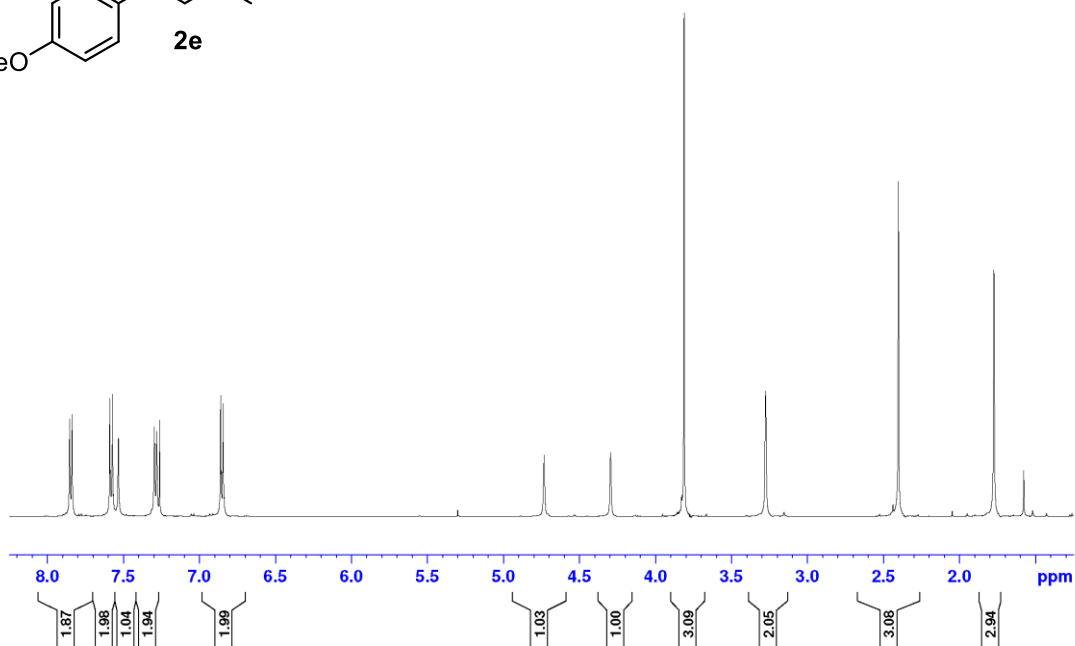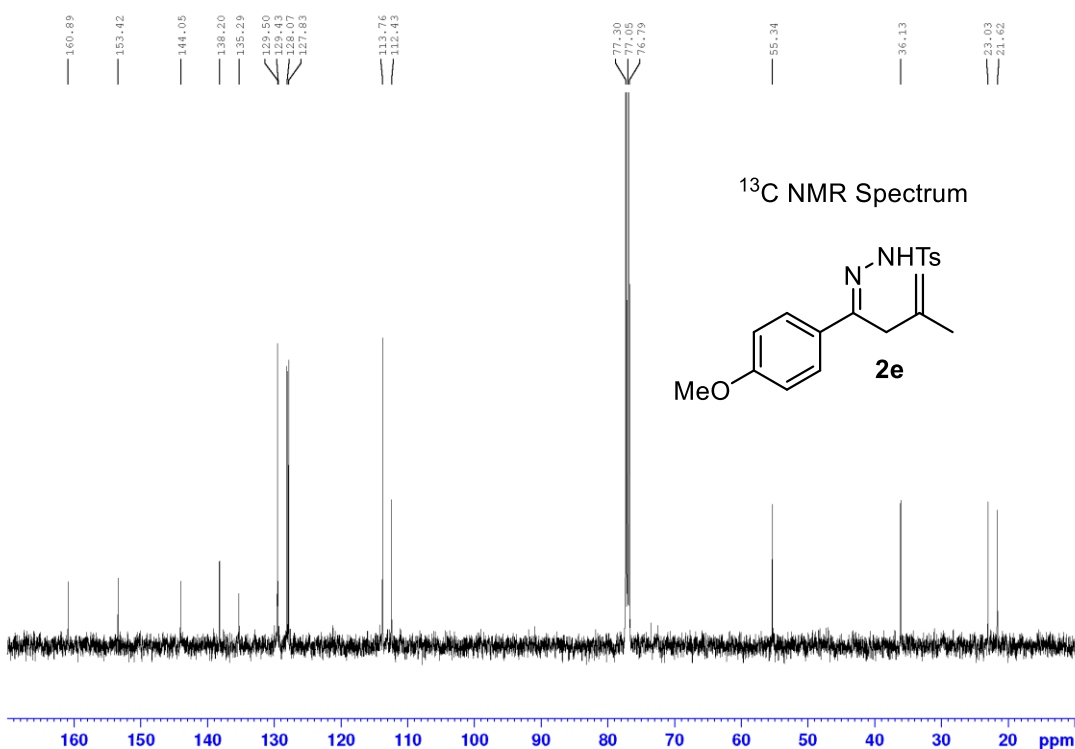

<sup>13</sup>C NMR Spectrum

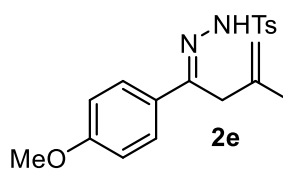

<sup>1</sup>H NMR Spectrum

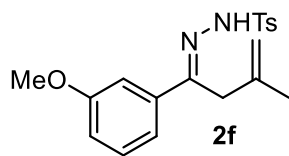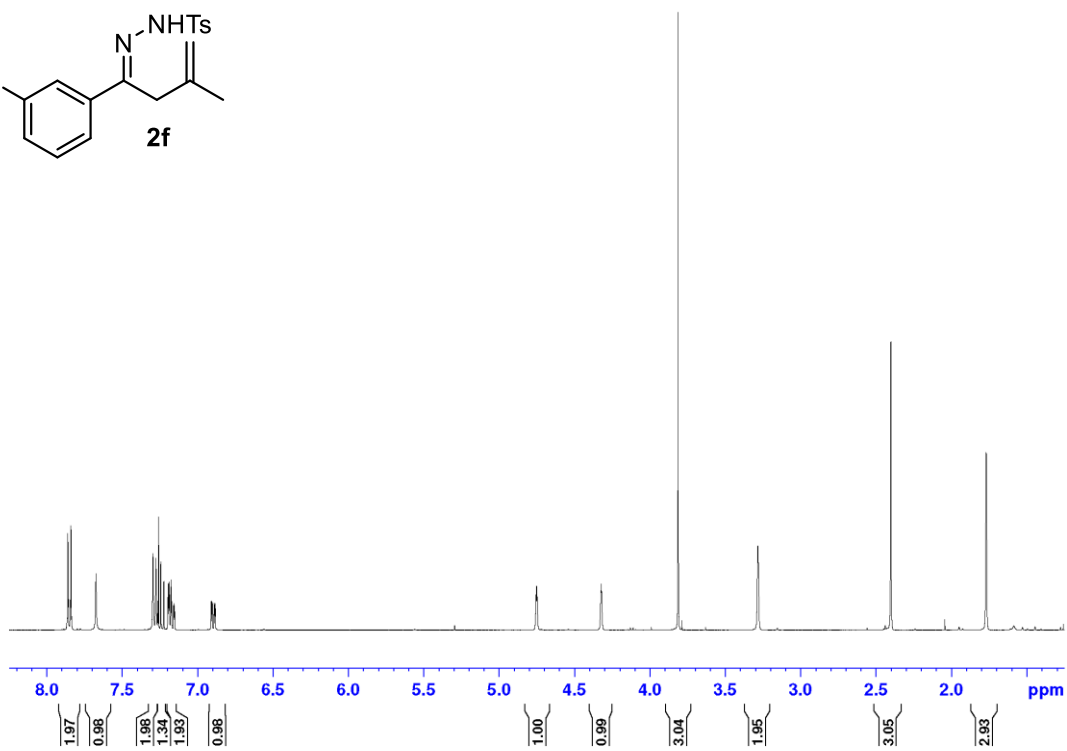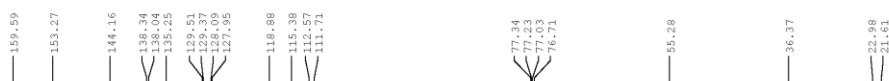

<sup>13</sup>C NMR Spectrum

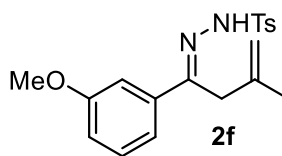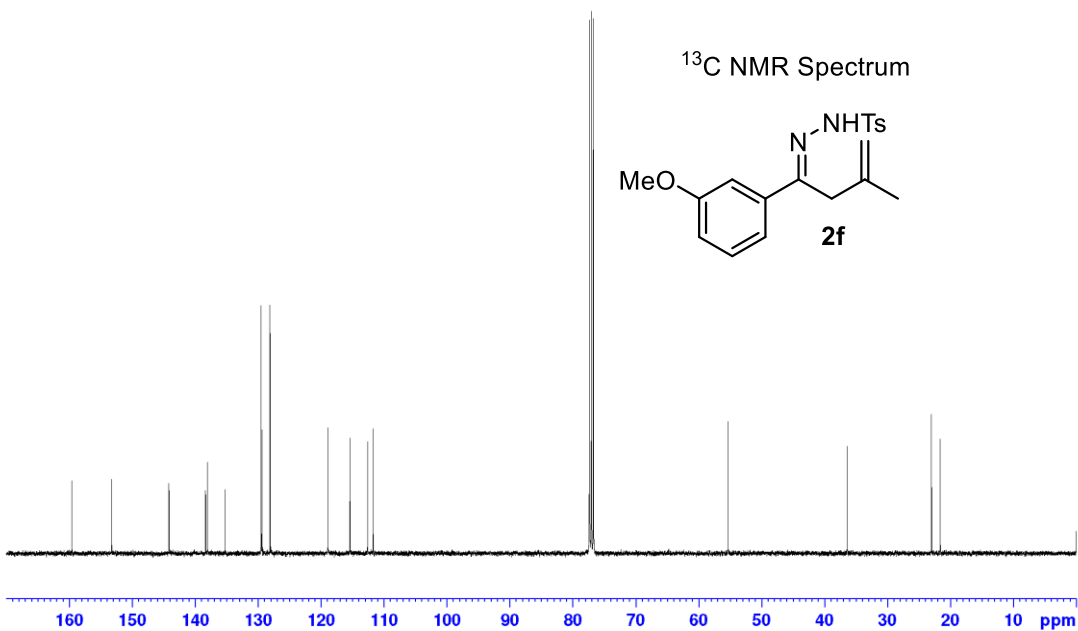

# <sup>1</sup>H NMR Spectrum

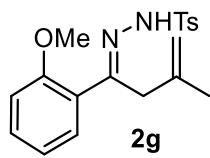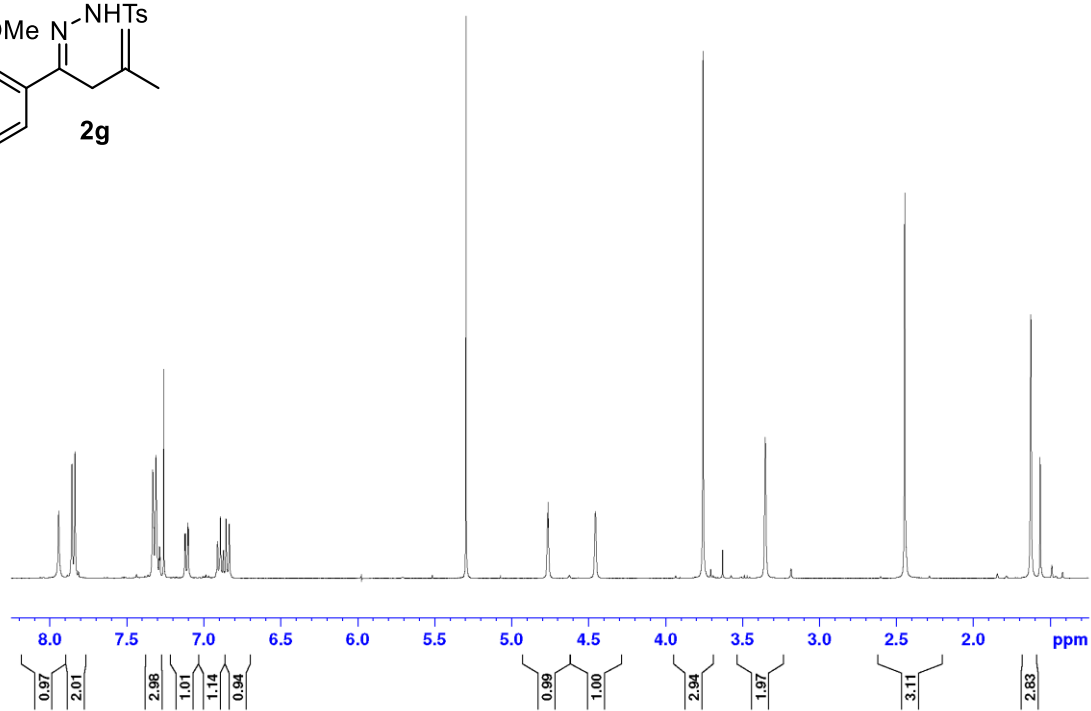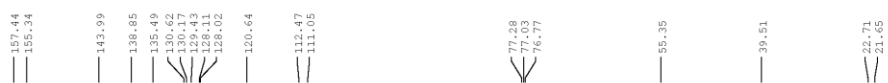

# <sup>13</sup>C NMR Spectrum

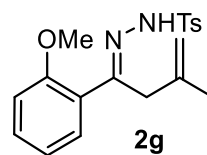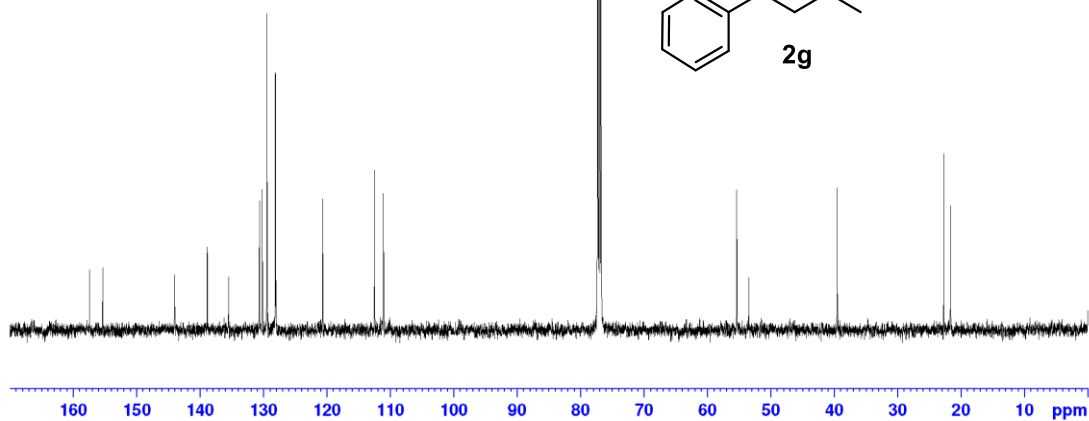

<sup>1</sup>H NMR Spectrum

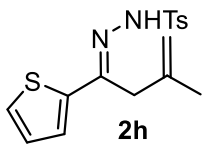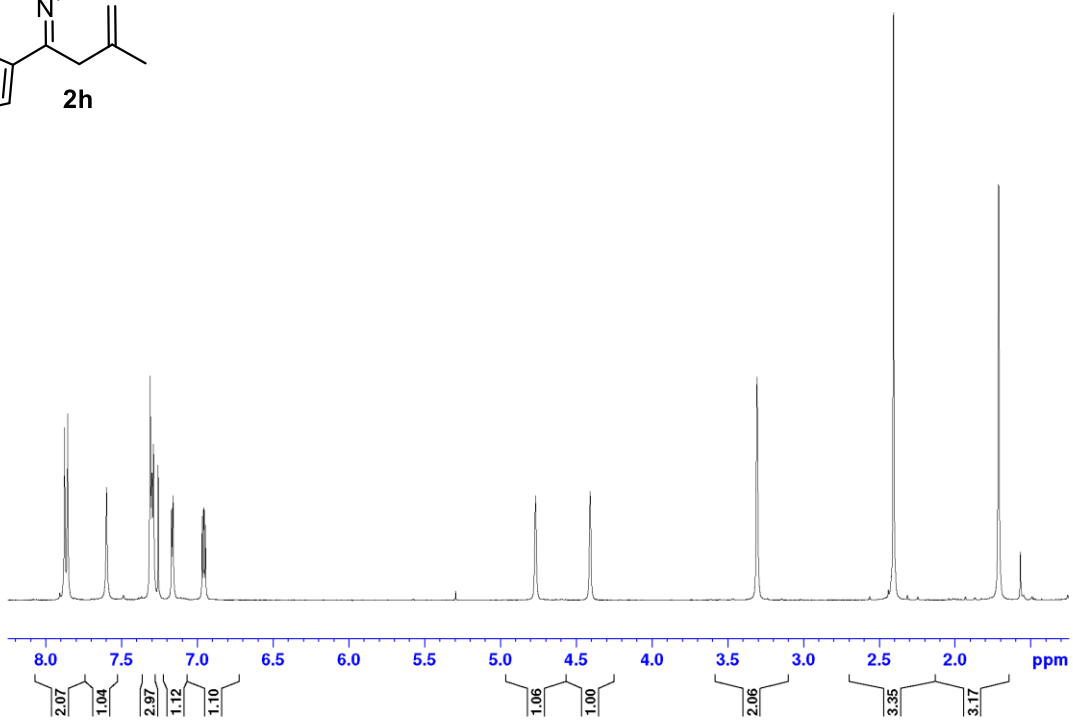

149.38  
144.17  
142.37  
137.95  
135.10  
129.45  
128.95  
128.21  
127.18  
126.89  
113.07  
77.28  
77.02  
76.77  
36.78  
22.67  
21.62

<sup>13</sup>C NMR Spectrum

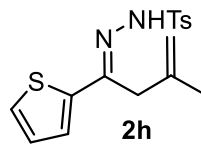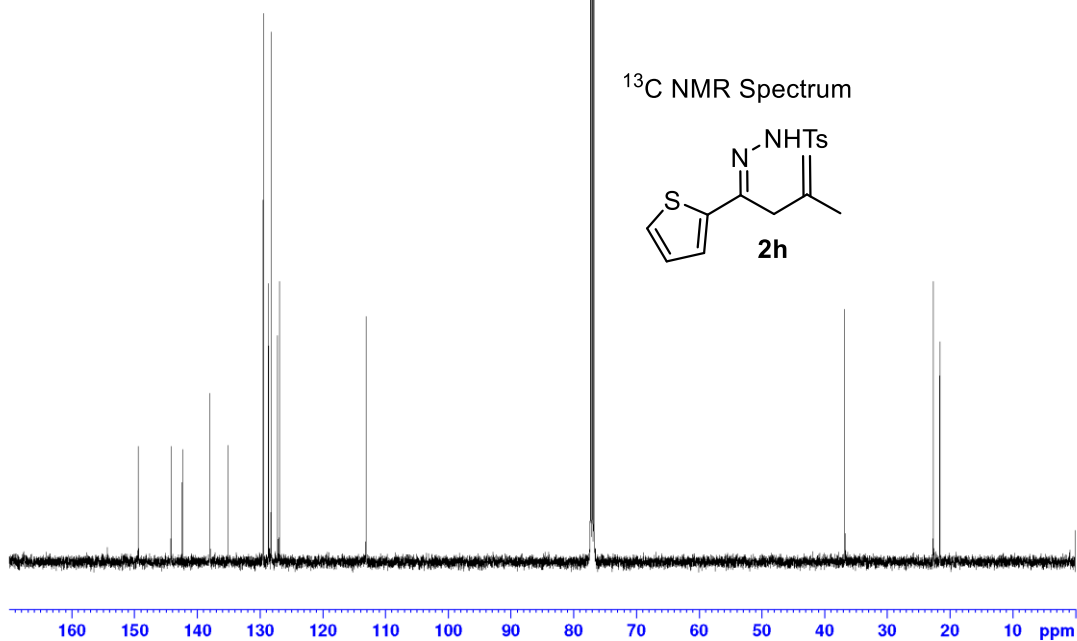



# <sup>1</sup>H NMR Spectrum

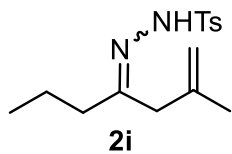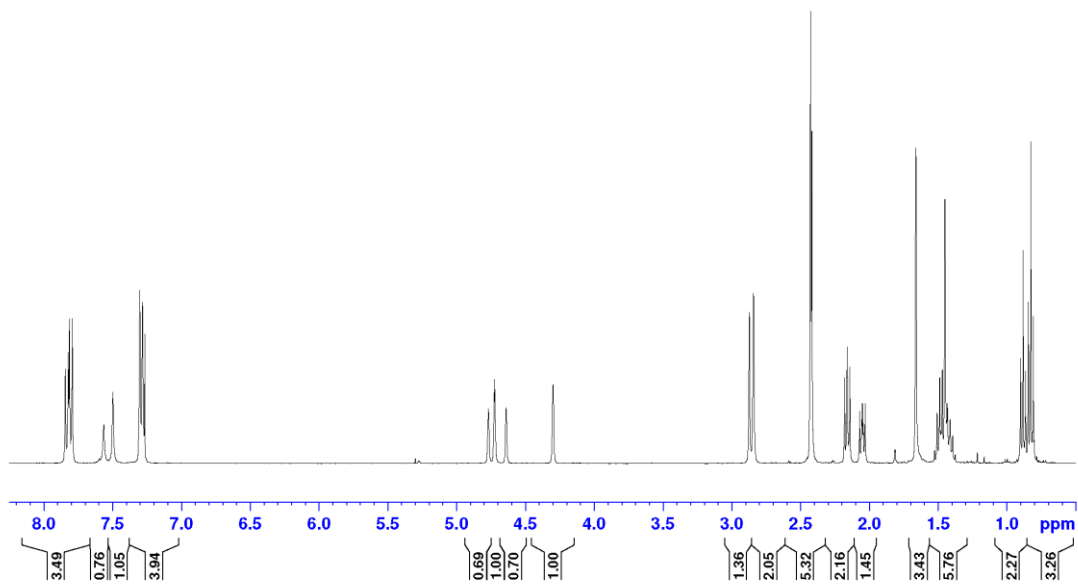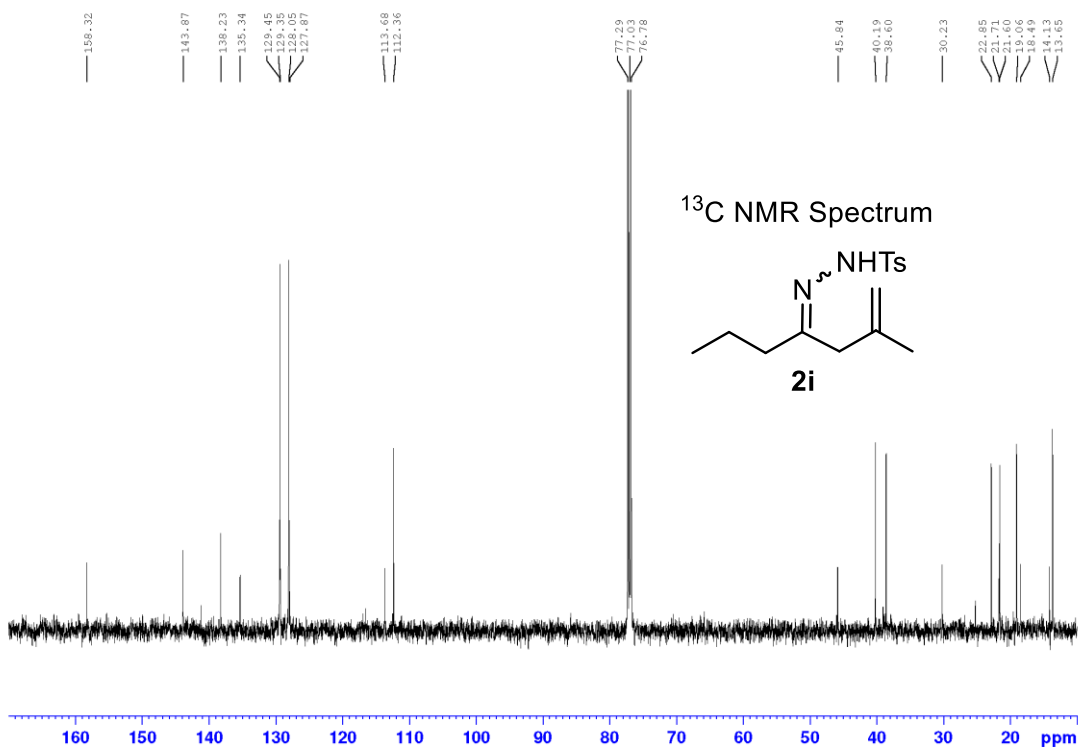

# <sup>13</sup>C NMR Spectrum

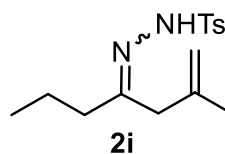

<sup>1</sup>H NMR Spectrum

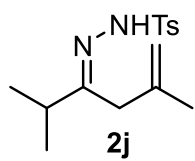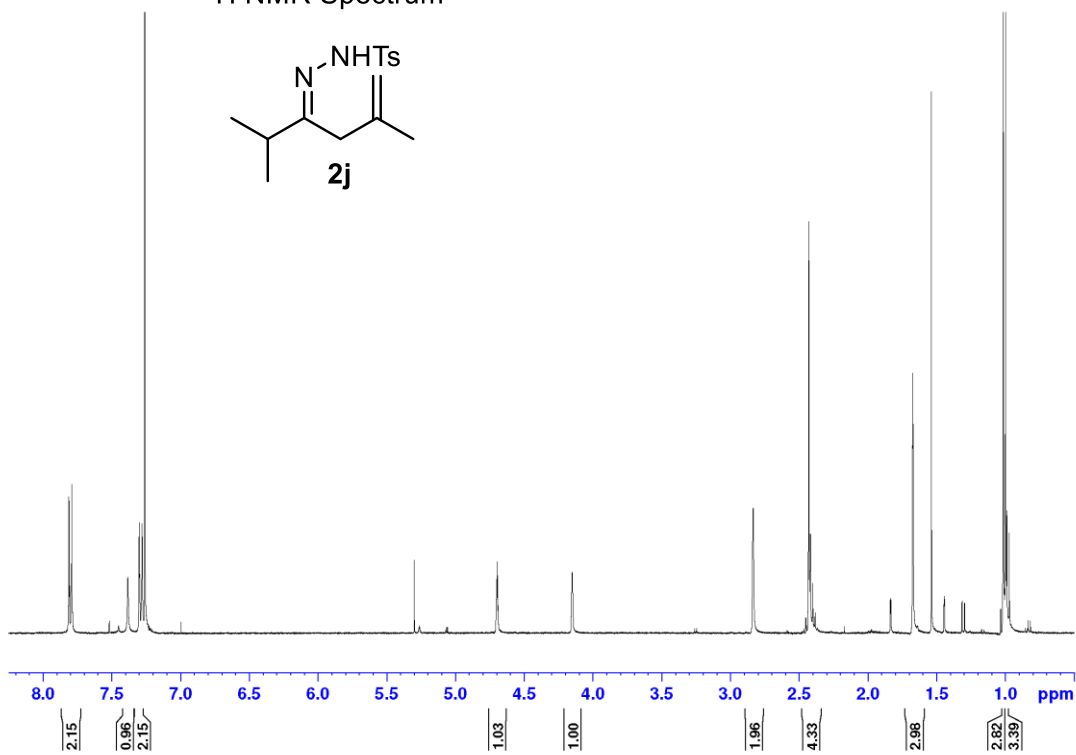

<sup>13</sup>C NMR Spectrum

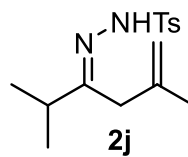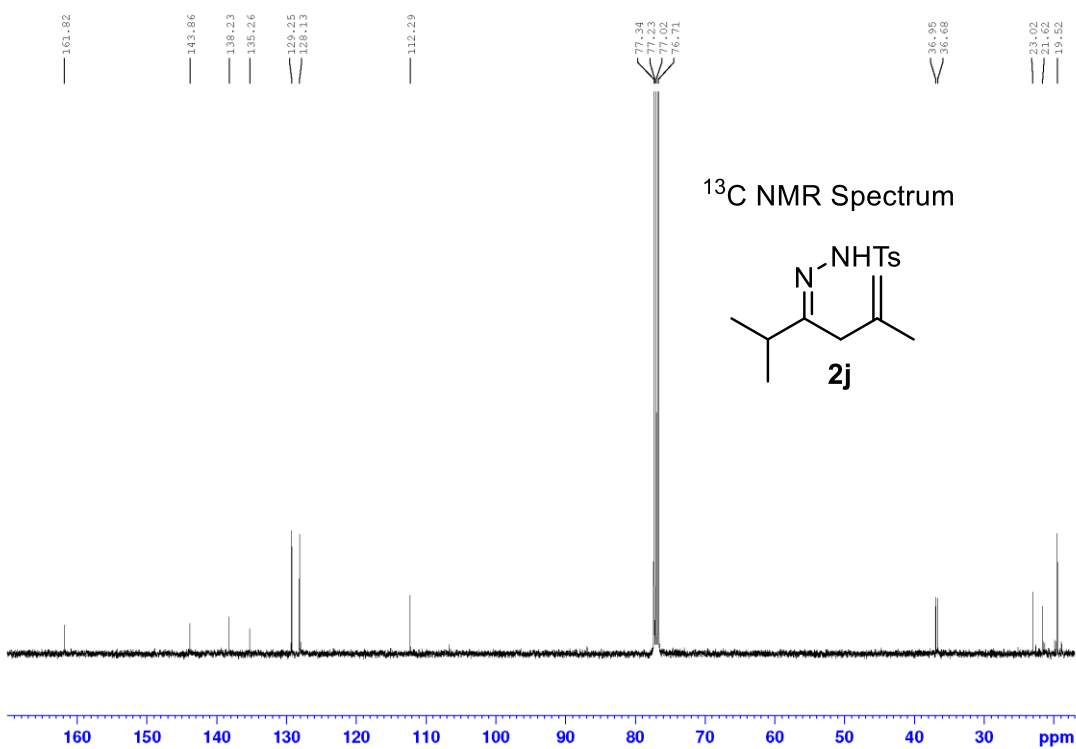

<sup>1</sup>H NMR Spectrum

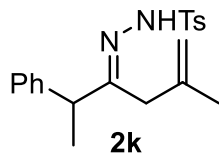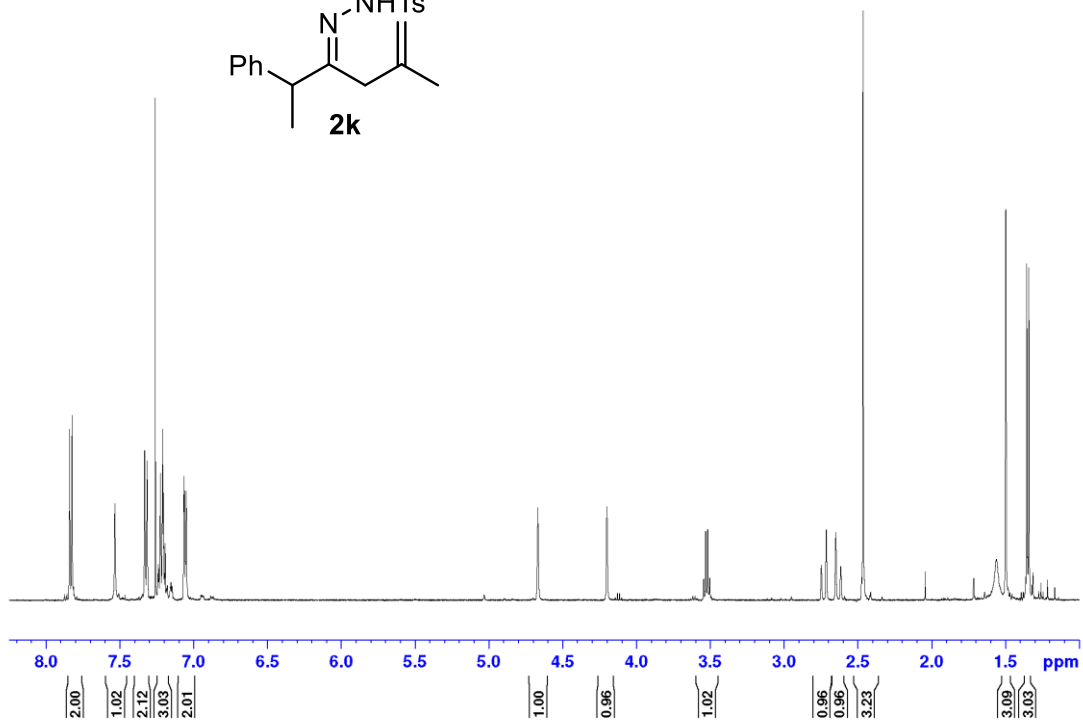

<sup>13</sup>C NMR Spectrum

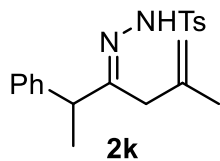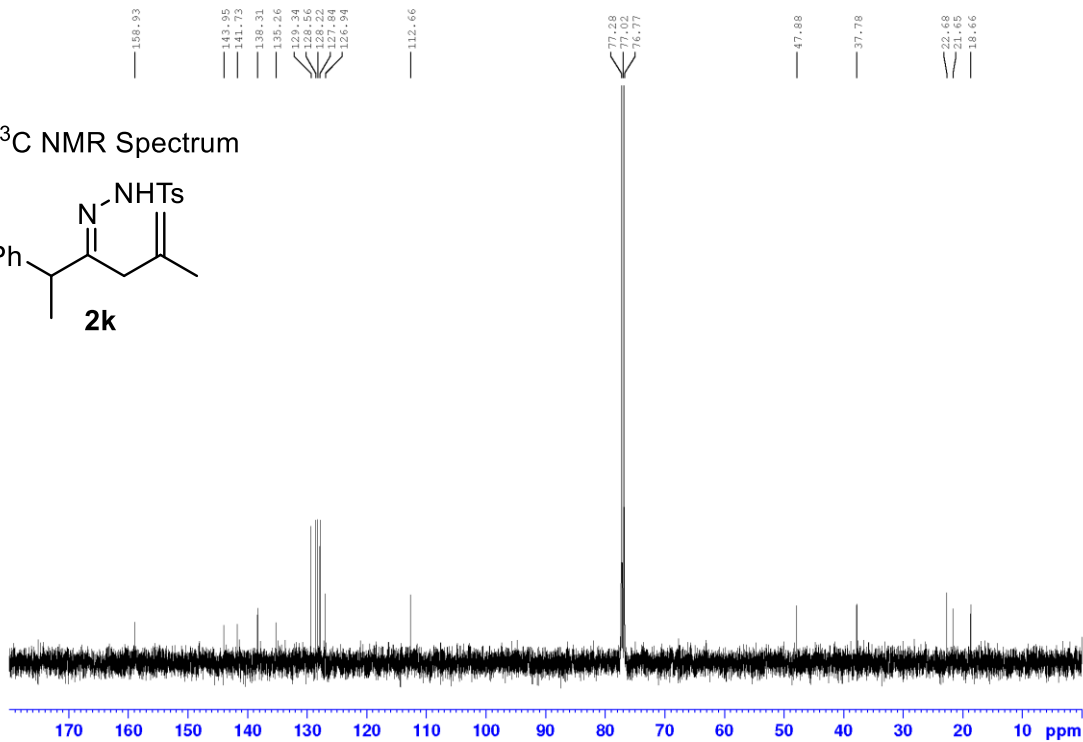

### <sup>1</sup>H NMR Spectrum

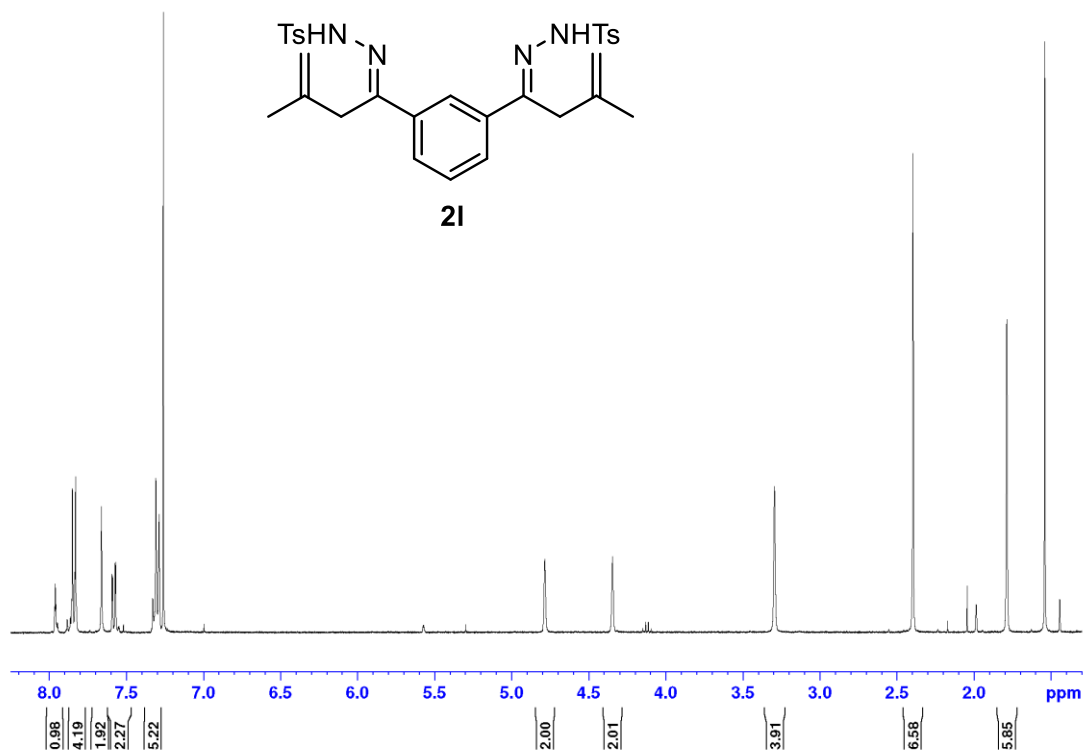

### <sup>13</sup>C NMR Spectrum

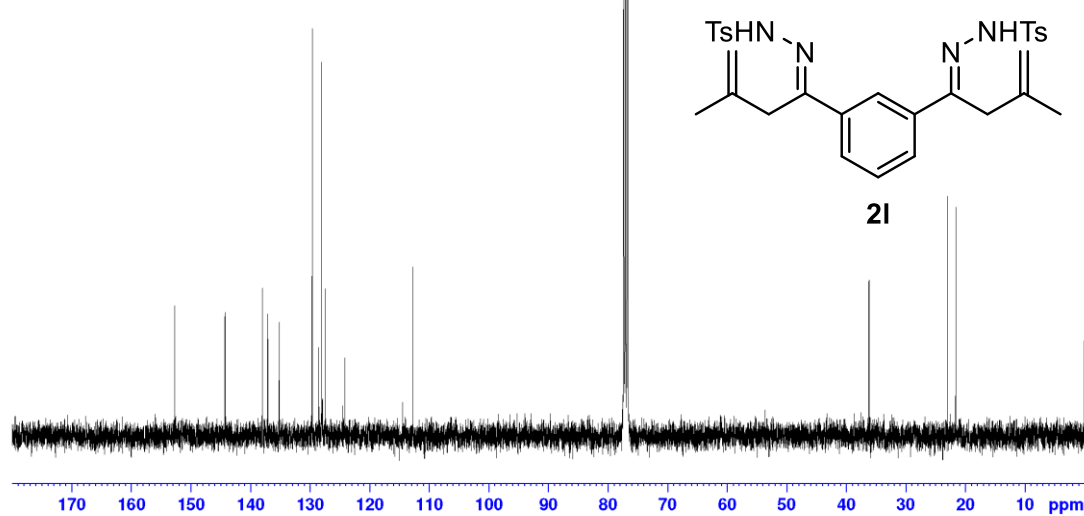

<sup>1</sup>H NMR Spectrum

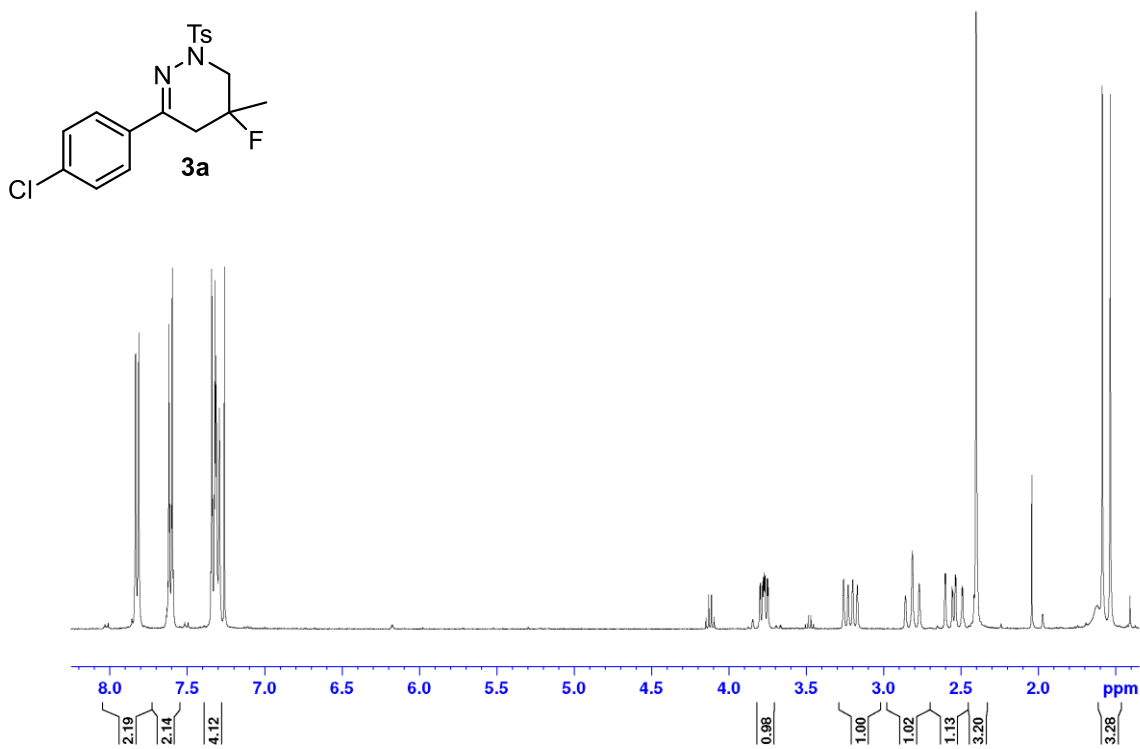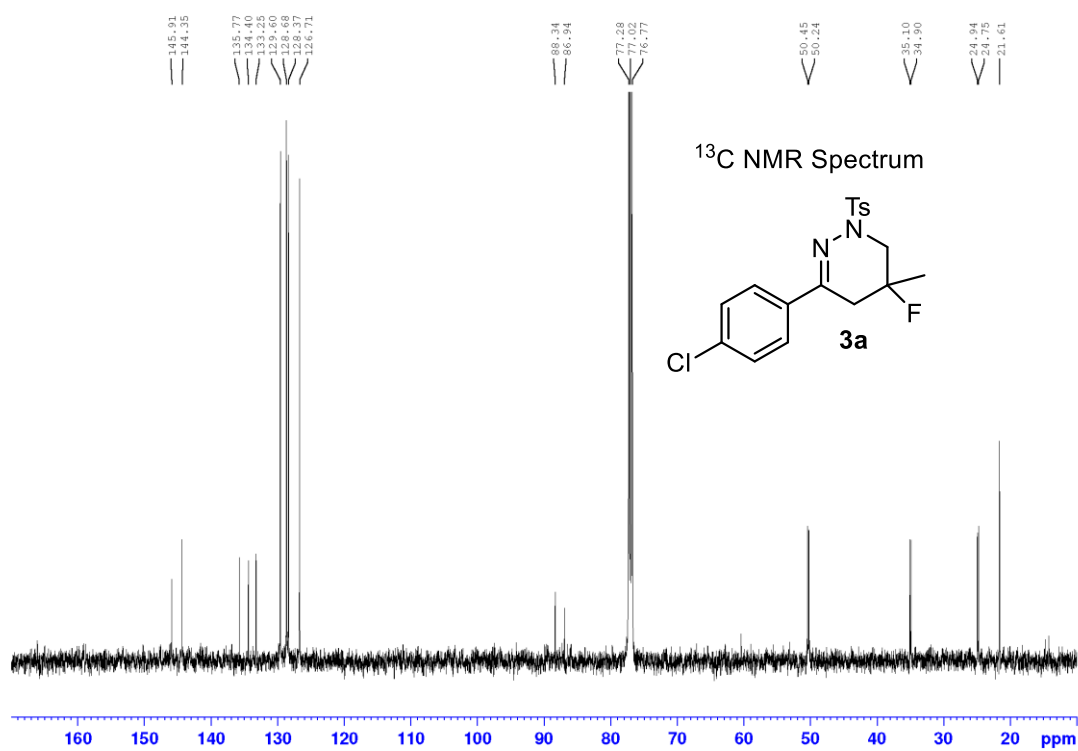

<sup>19</sup>F NMR Spectrum

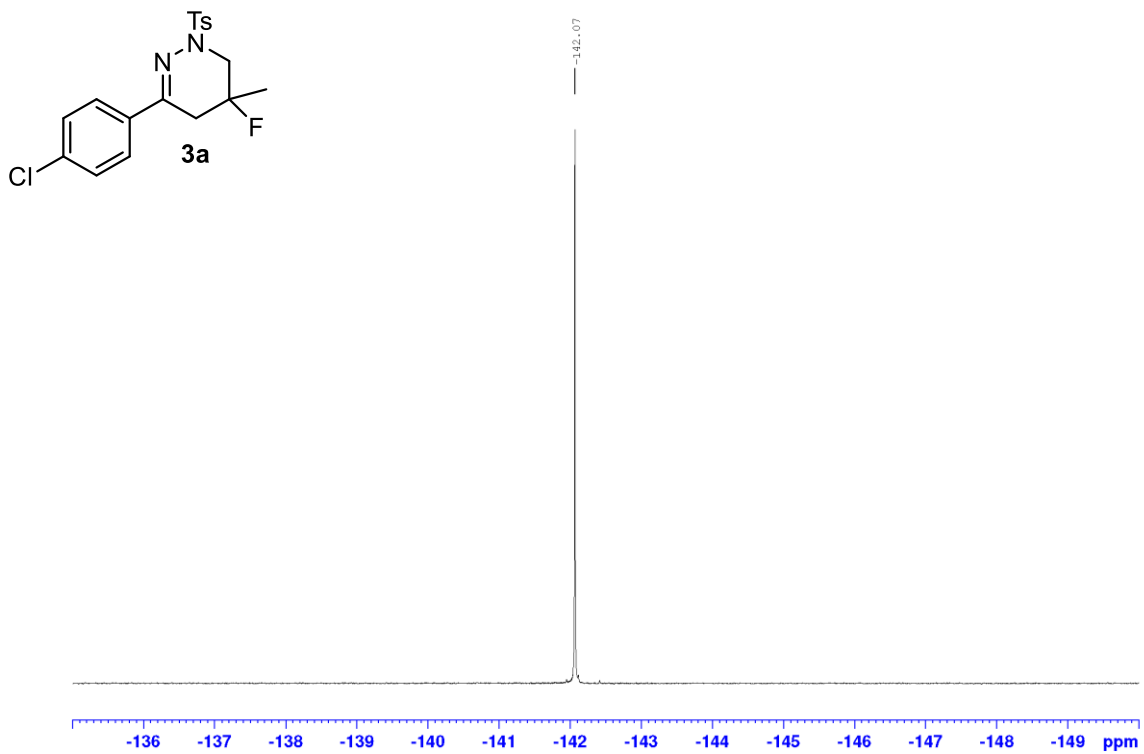

<sup>1</sup>H NMR Spectrum

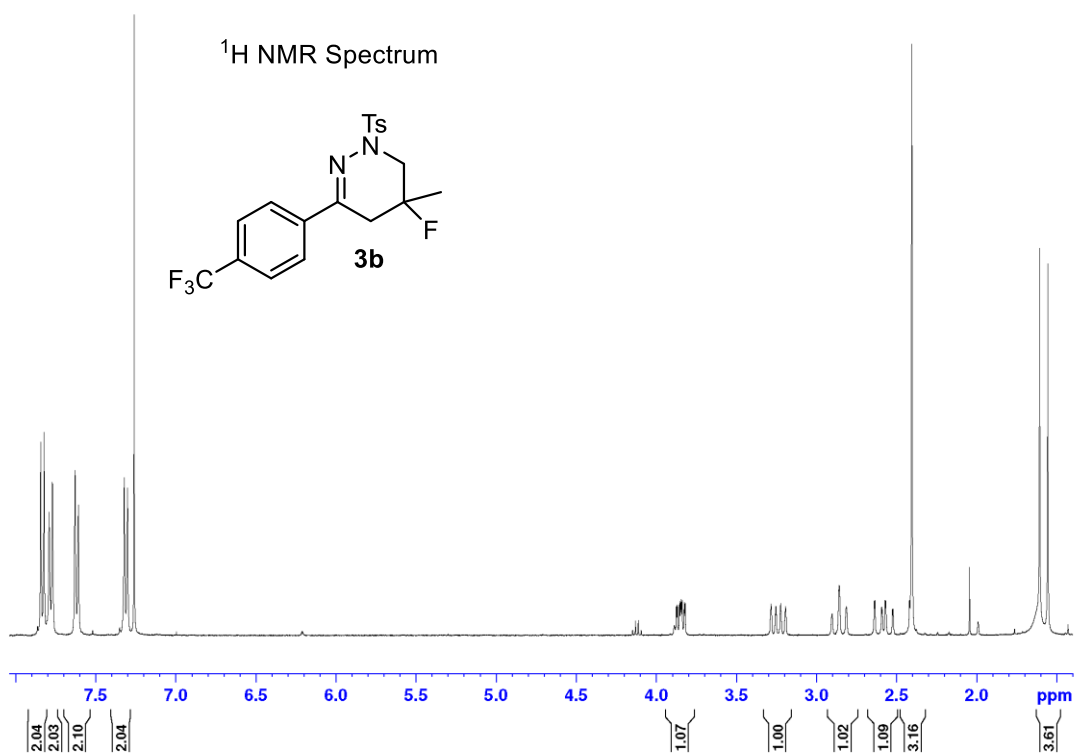

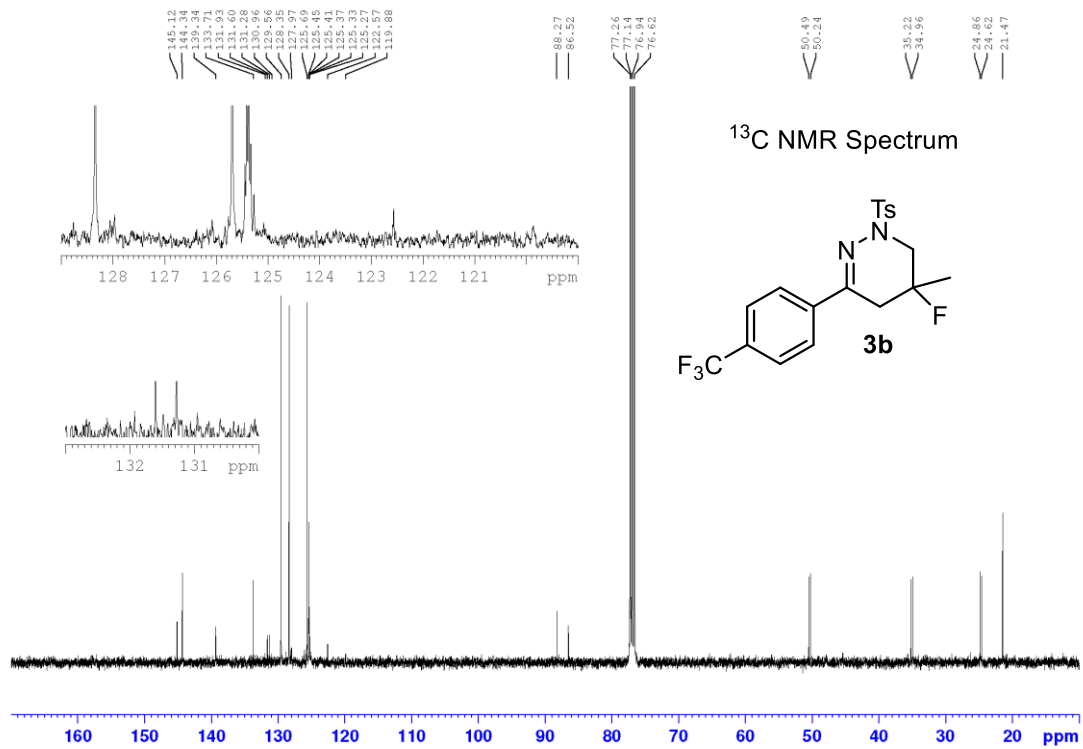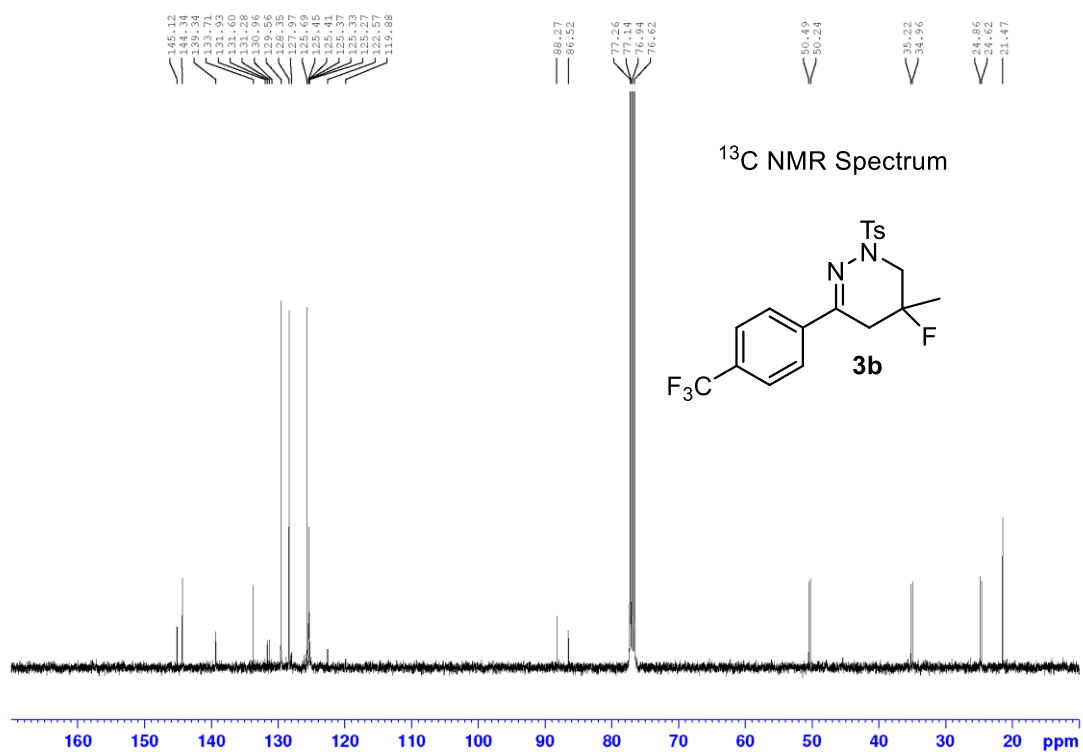

<sup>19</sup>F NMR Spectrum

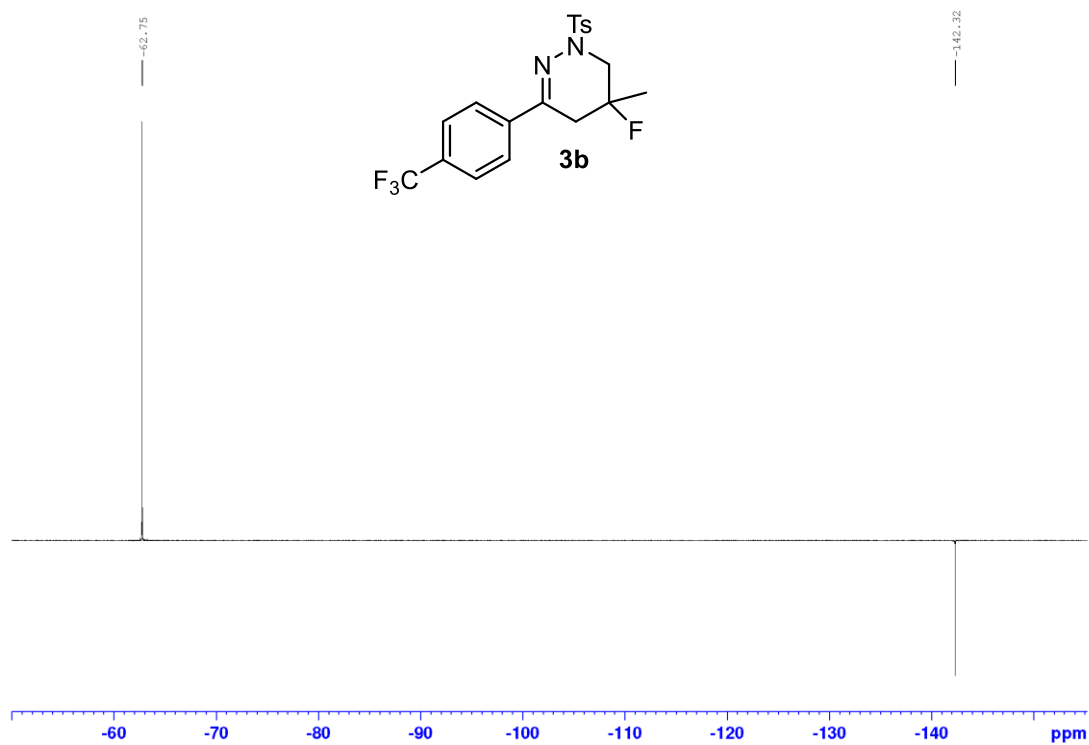

<sup>1</sup>H NMR Spectrum

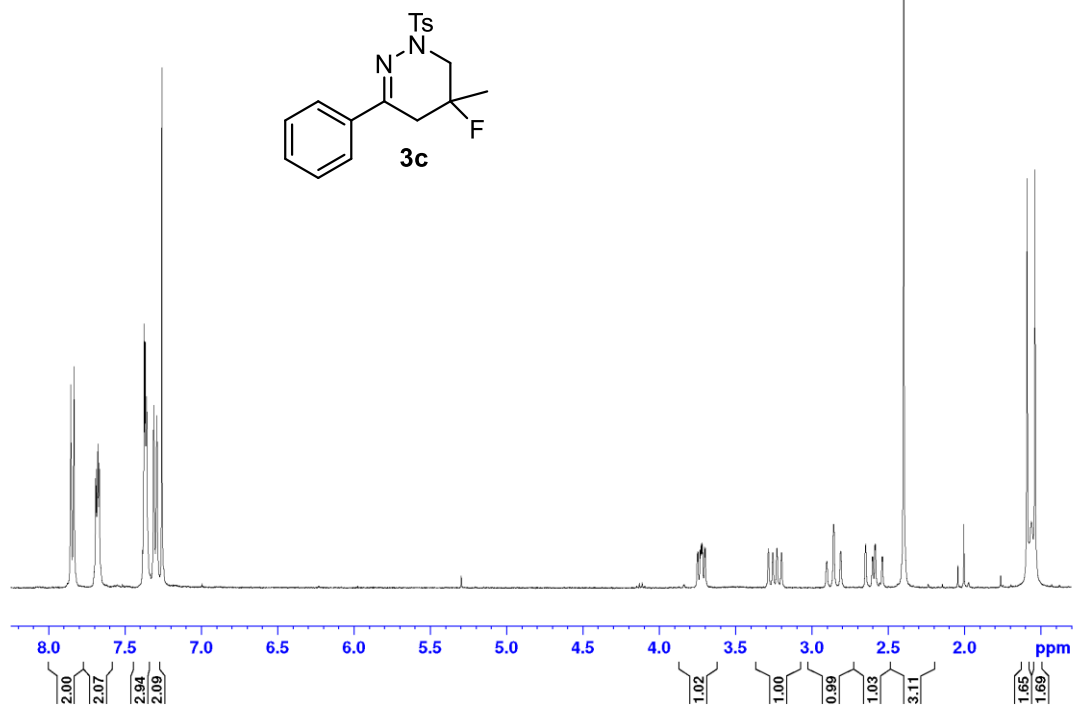



$^1\text{H}\{^{19}\text{F}\}$  NMR Spectrum

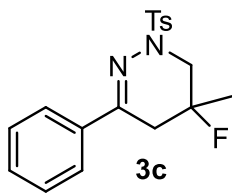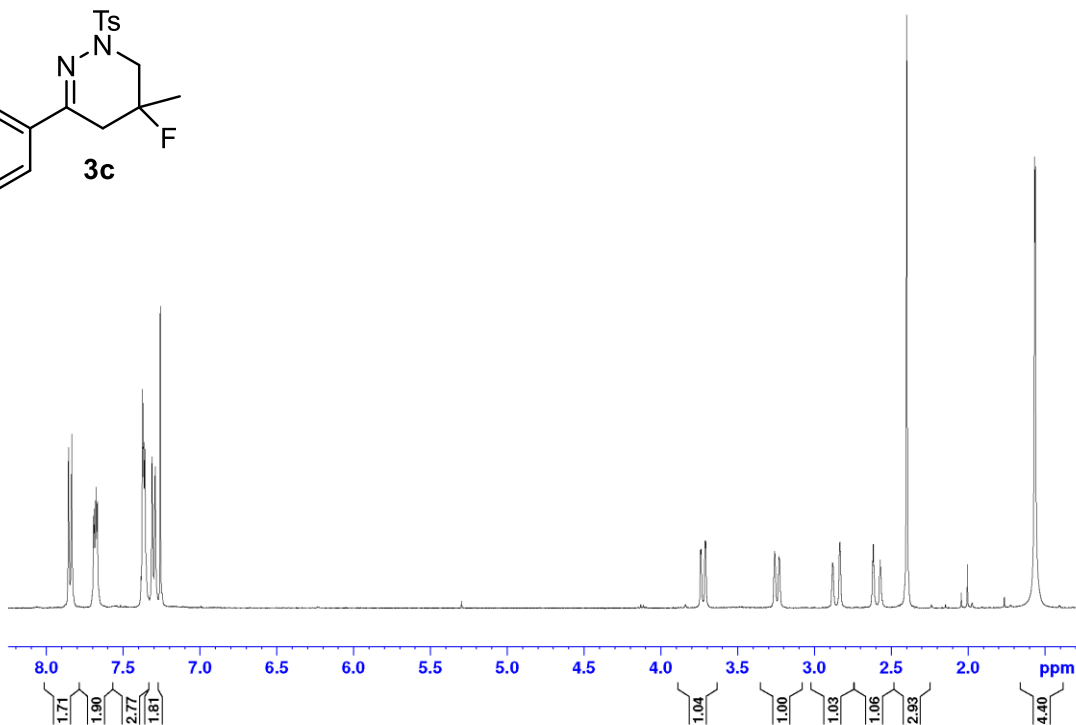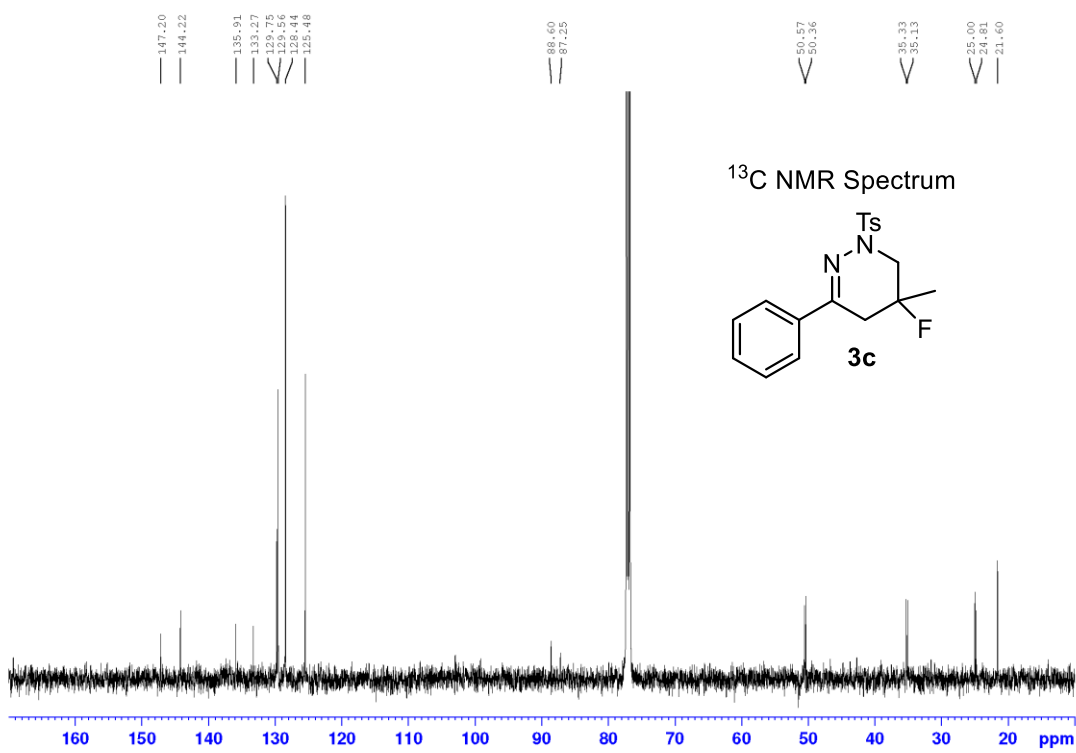

$^{13}\text{C}$  NMR Spectrum

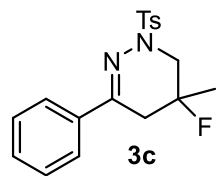

<sup>19</sup>F NMR Spectrum

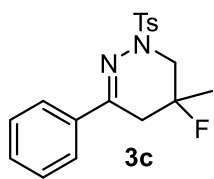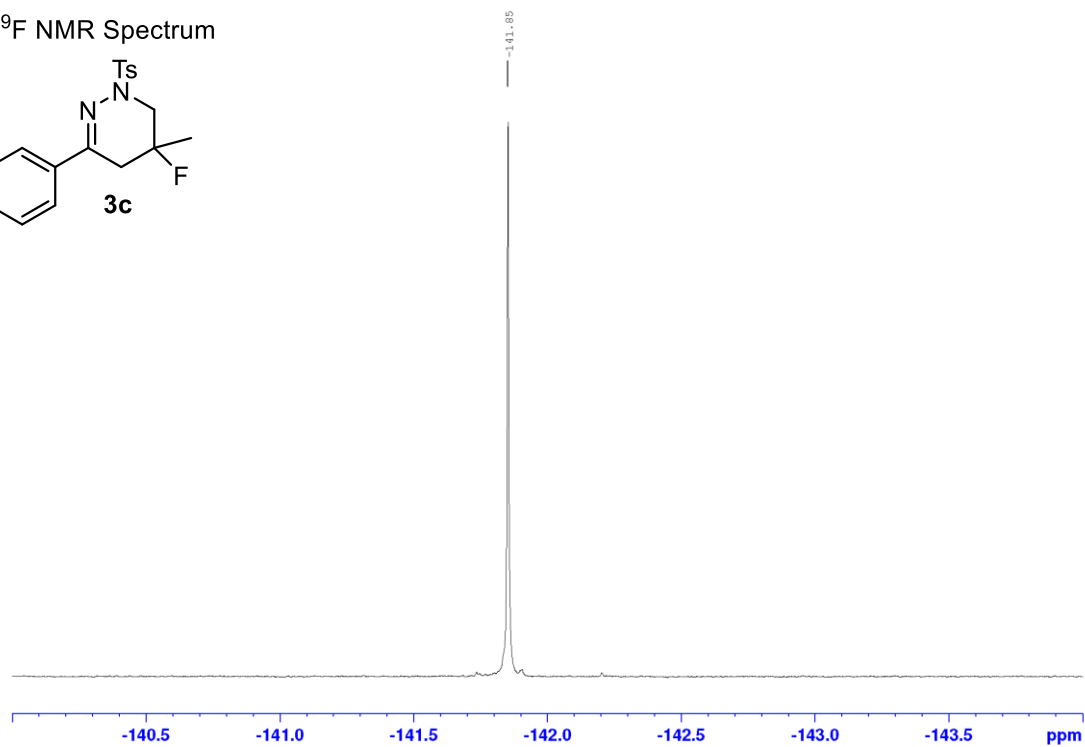

<sup>1</sup>H NMR Spectrum

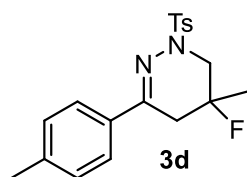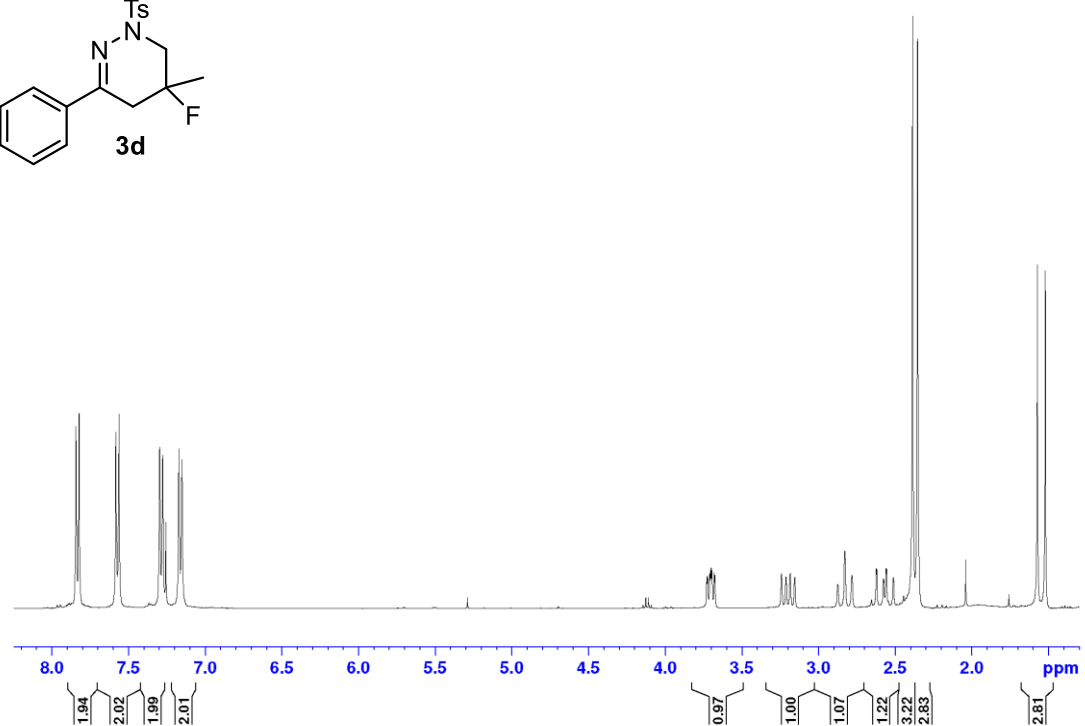

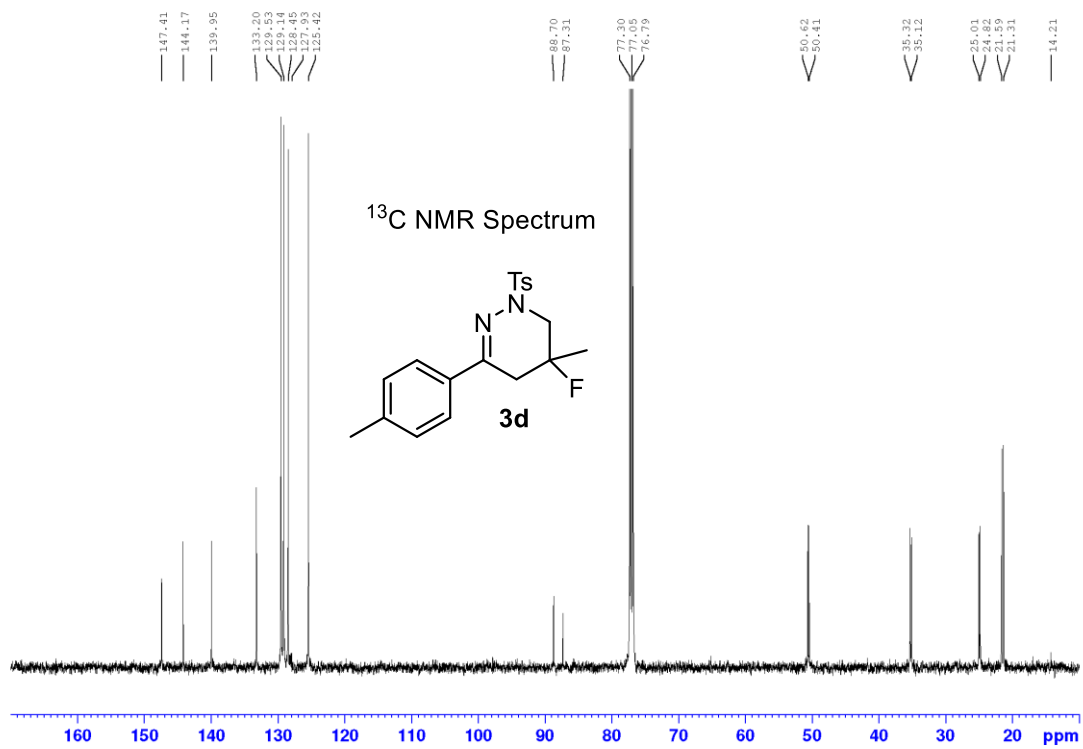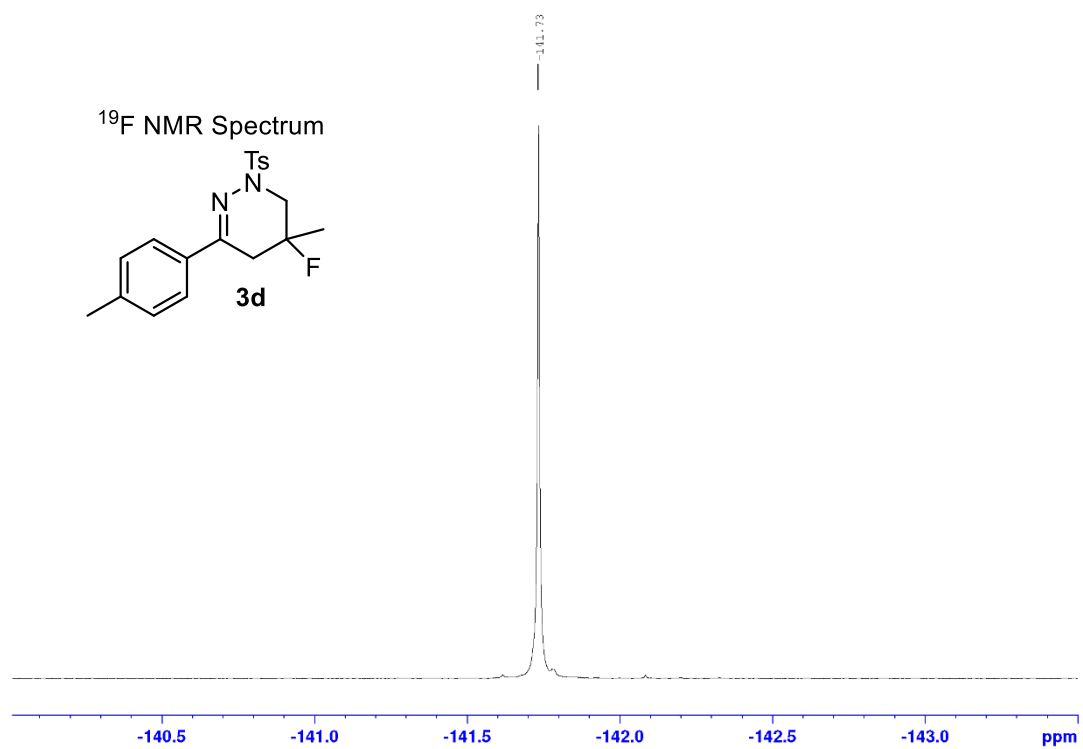

<sup>1</sup>H NMR Spectrum

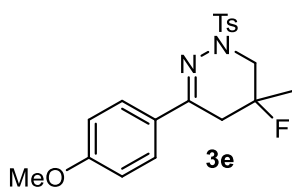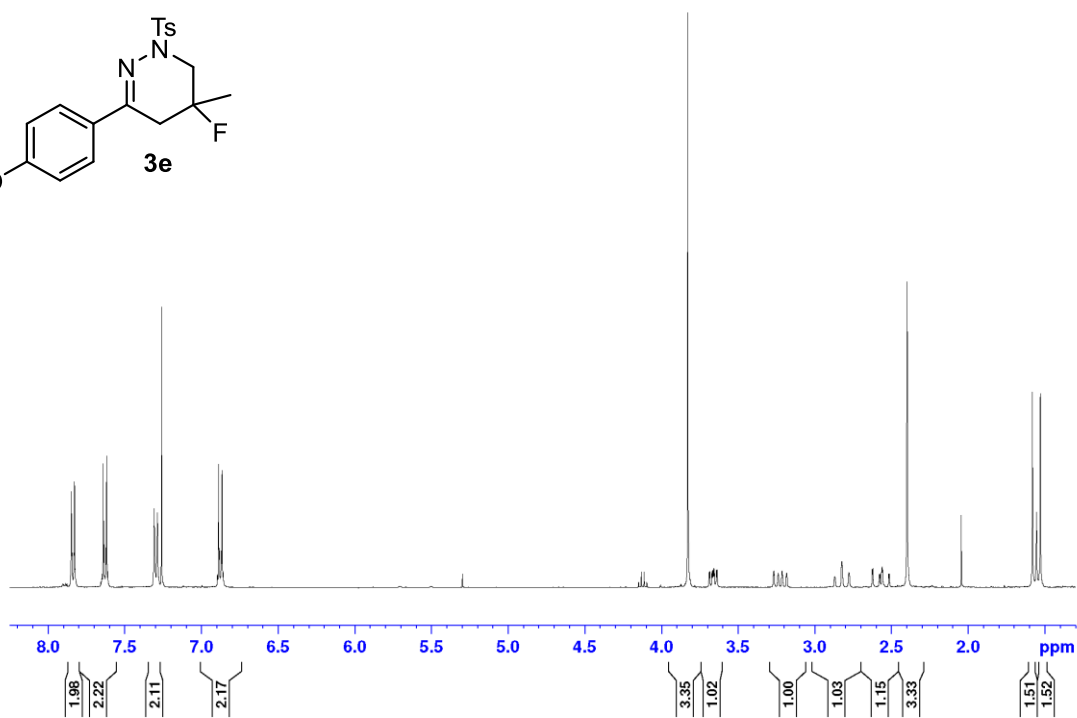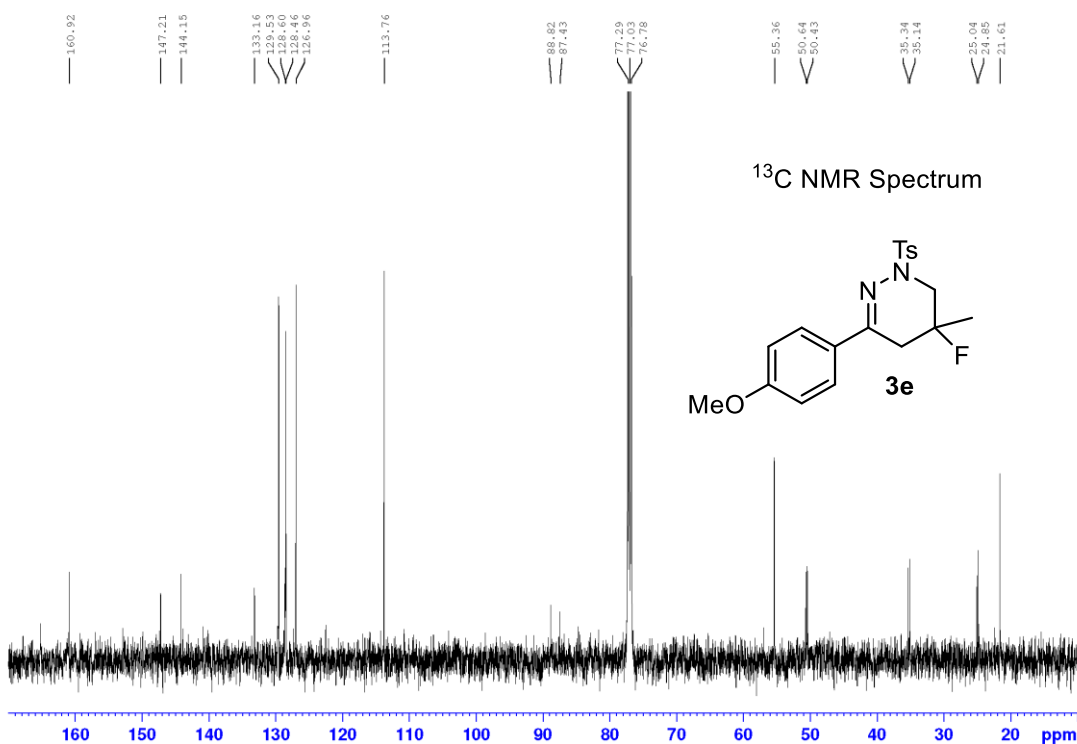

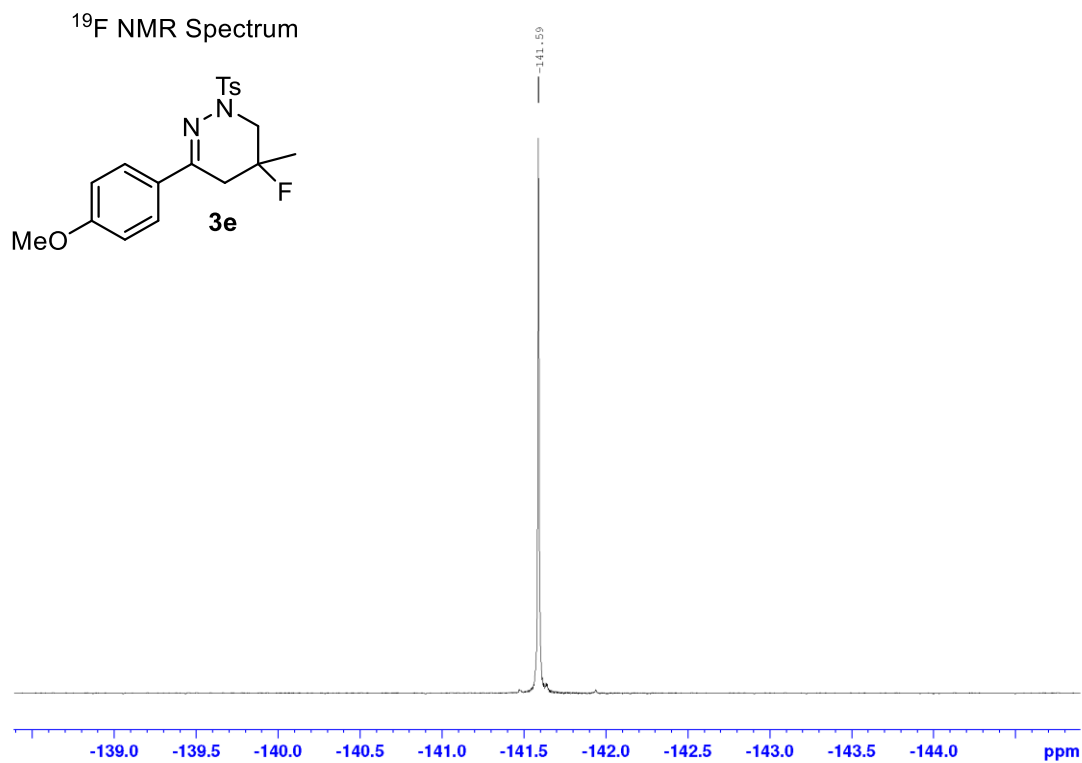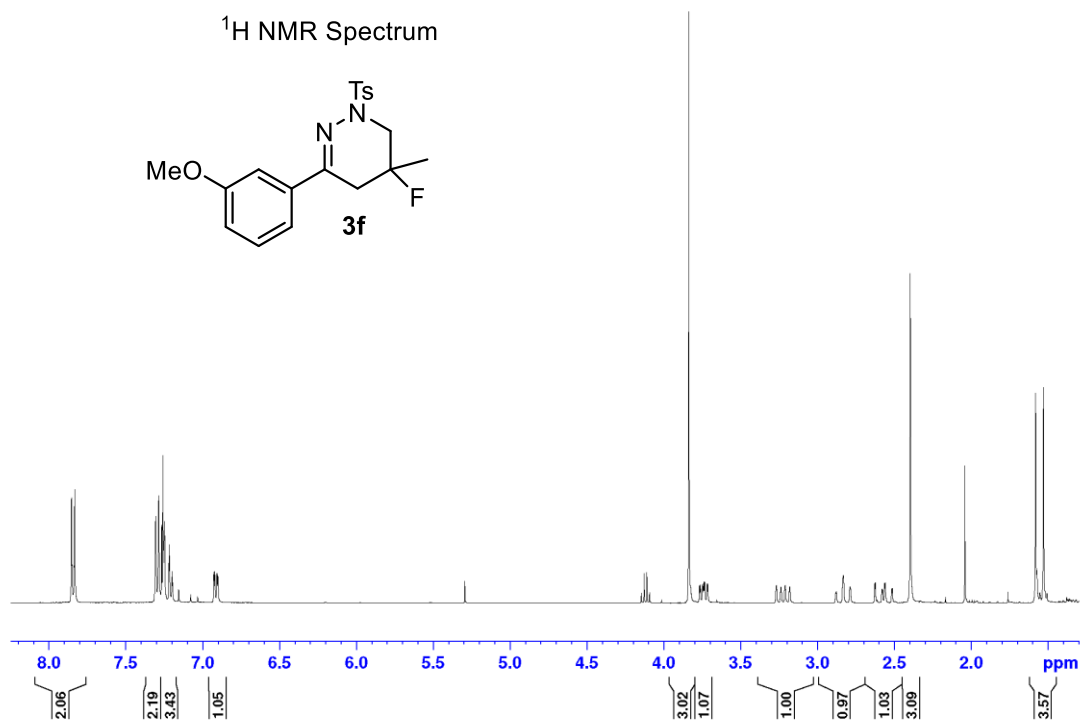

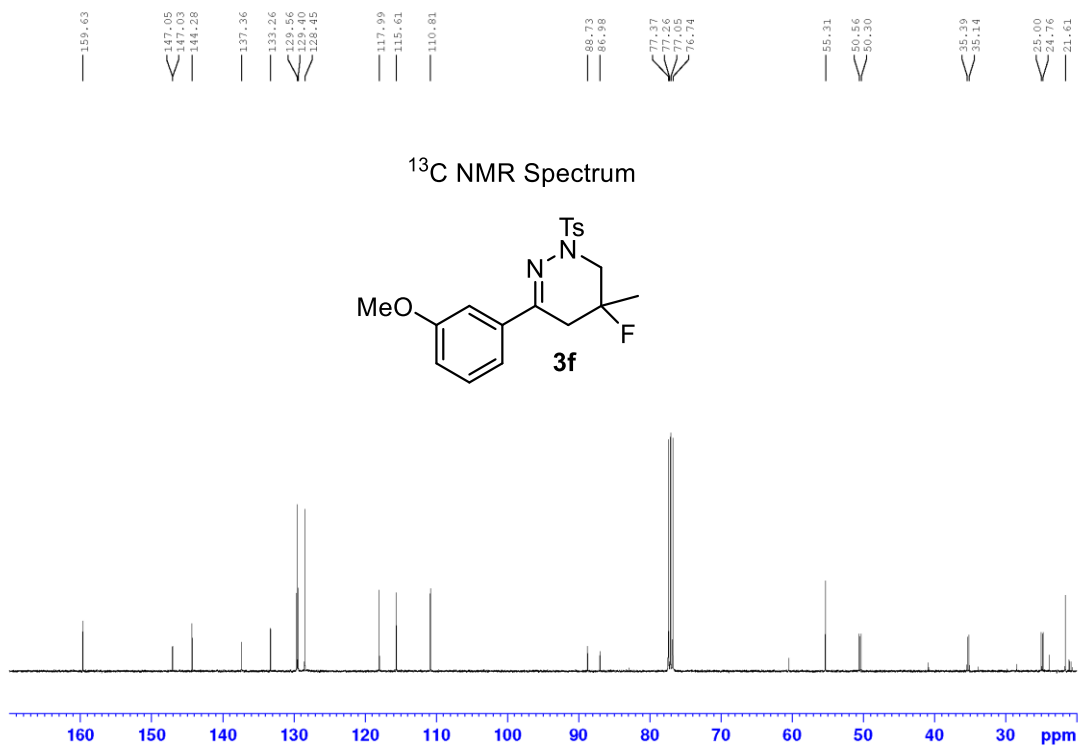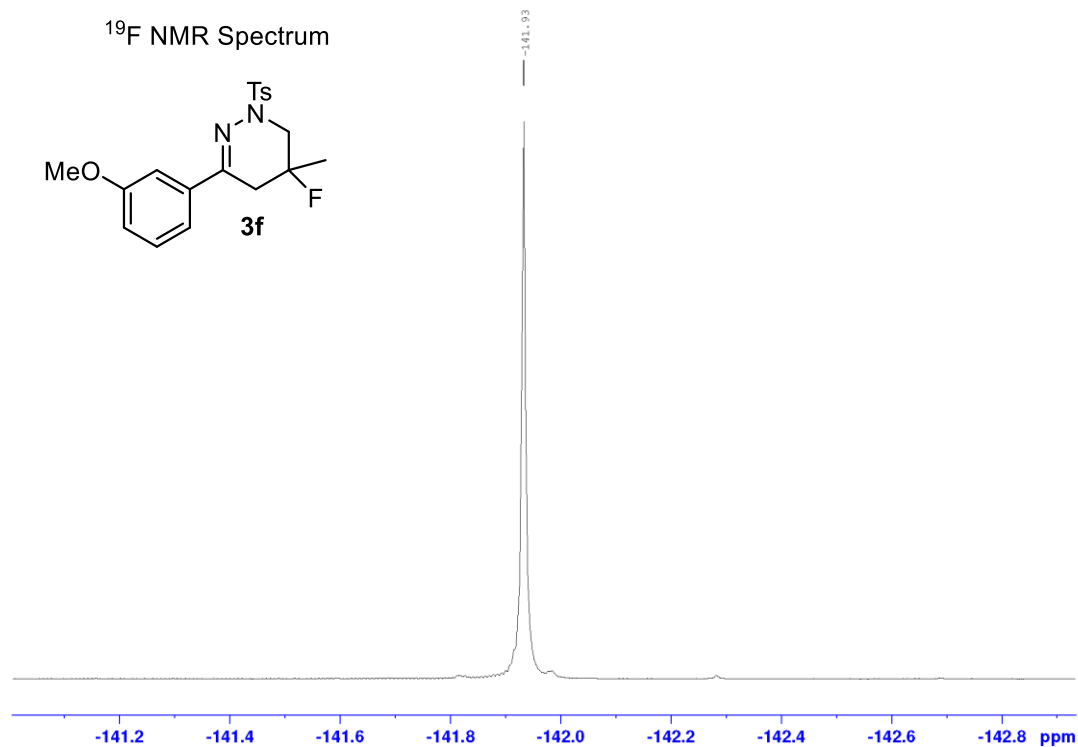

# <sup>1</sup>H NMR Spectrum

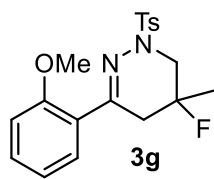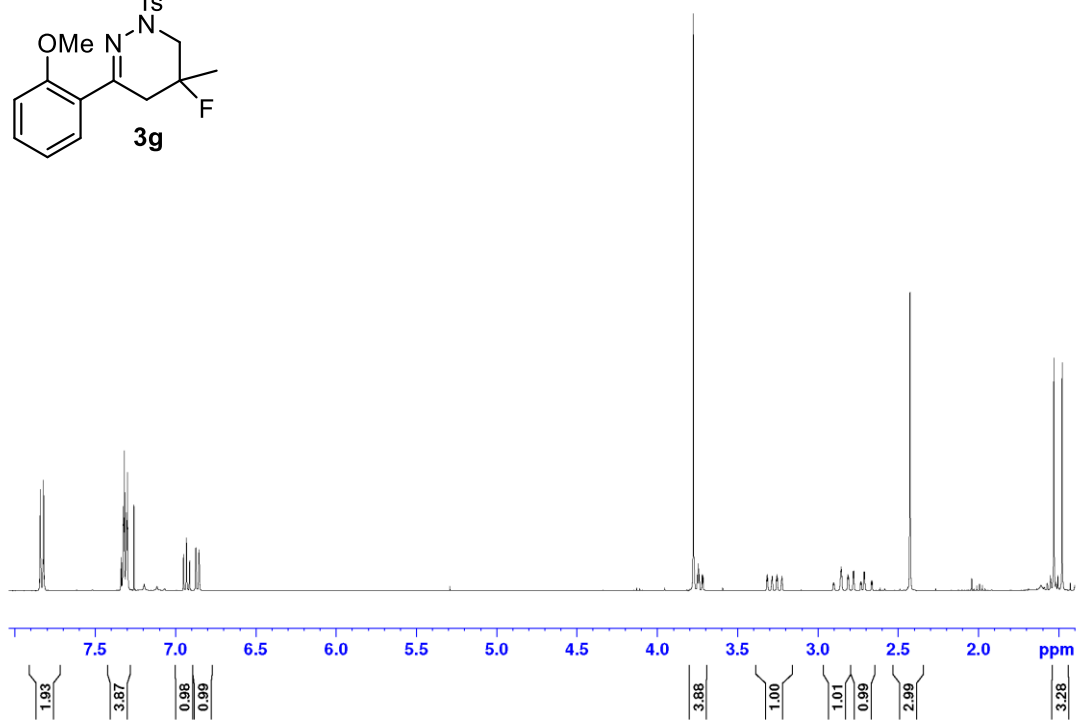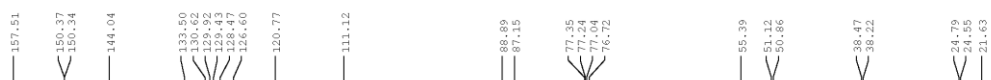

# <sup>13</sup>C NMR Spectrum

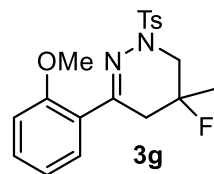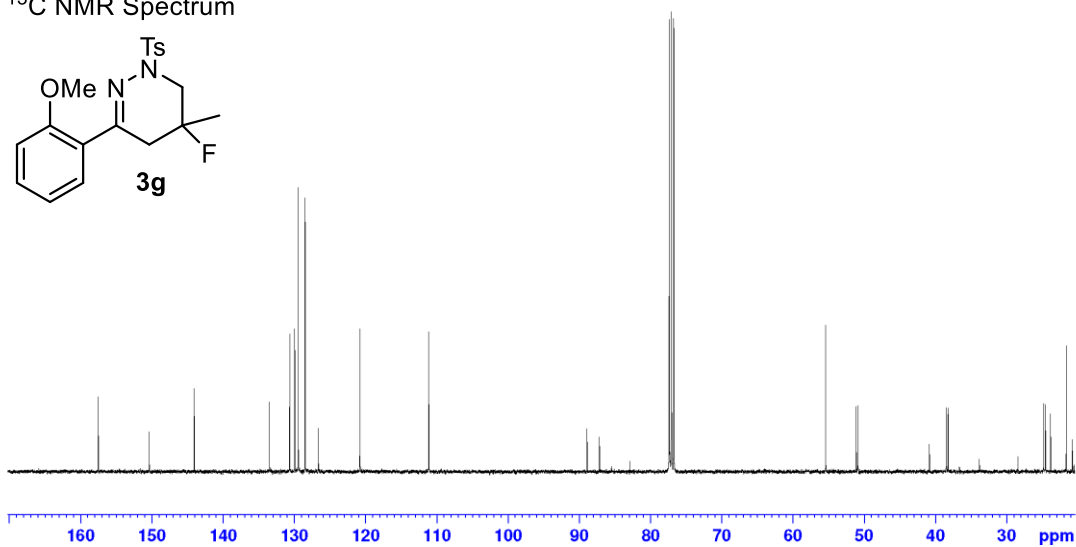

<sup>19</sup>F NMR Spectrum

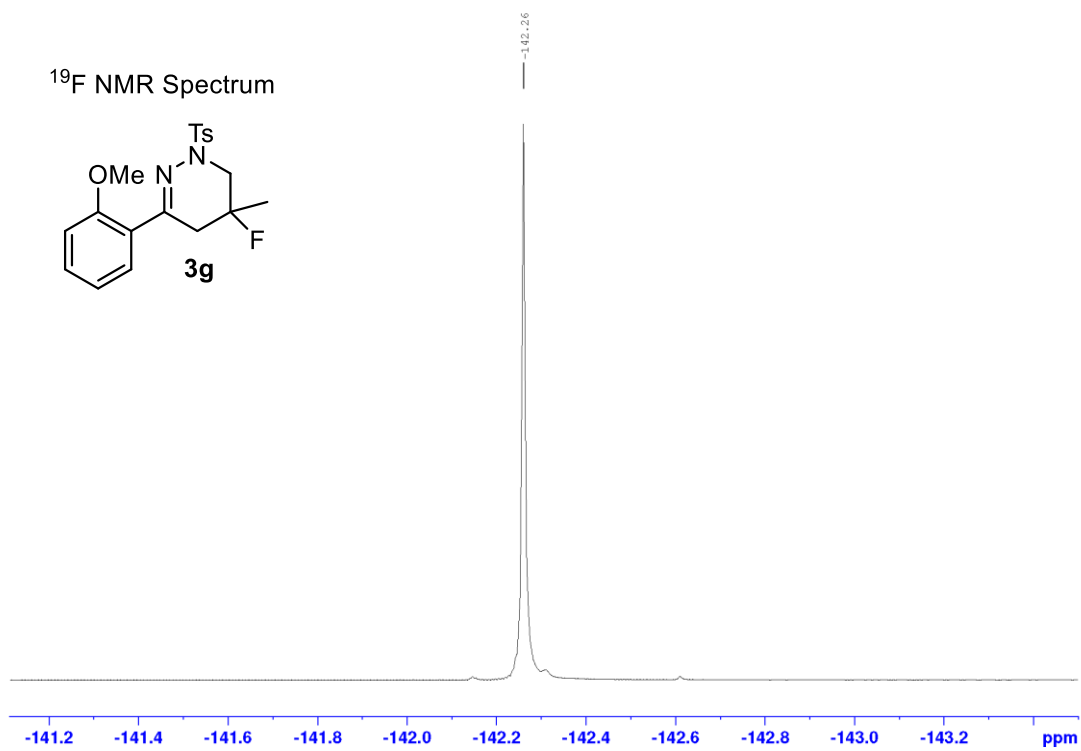

<sup>1</sup>H NMR Spectrum

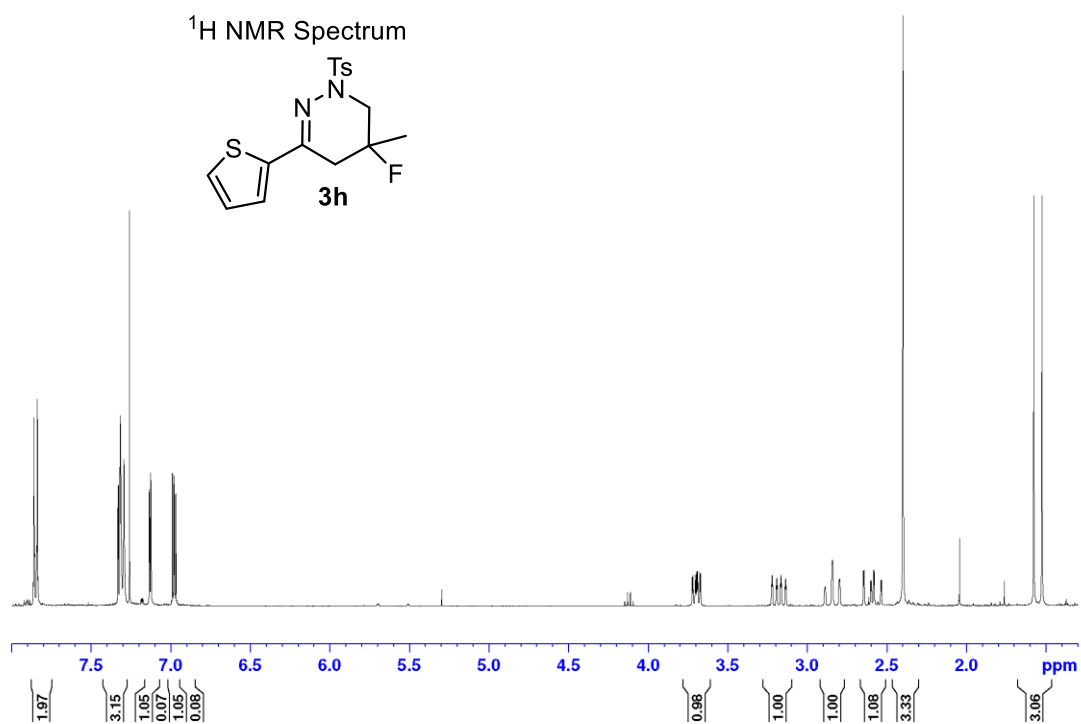



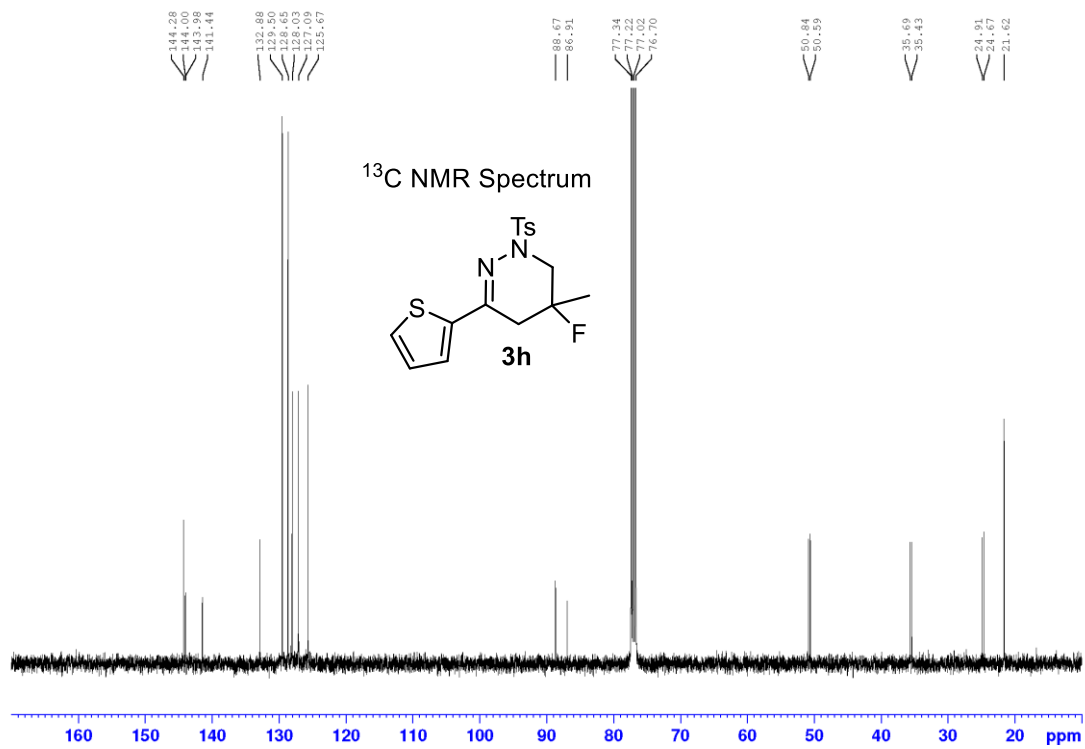

<sup>19</sup>F NMR Spectrum

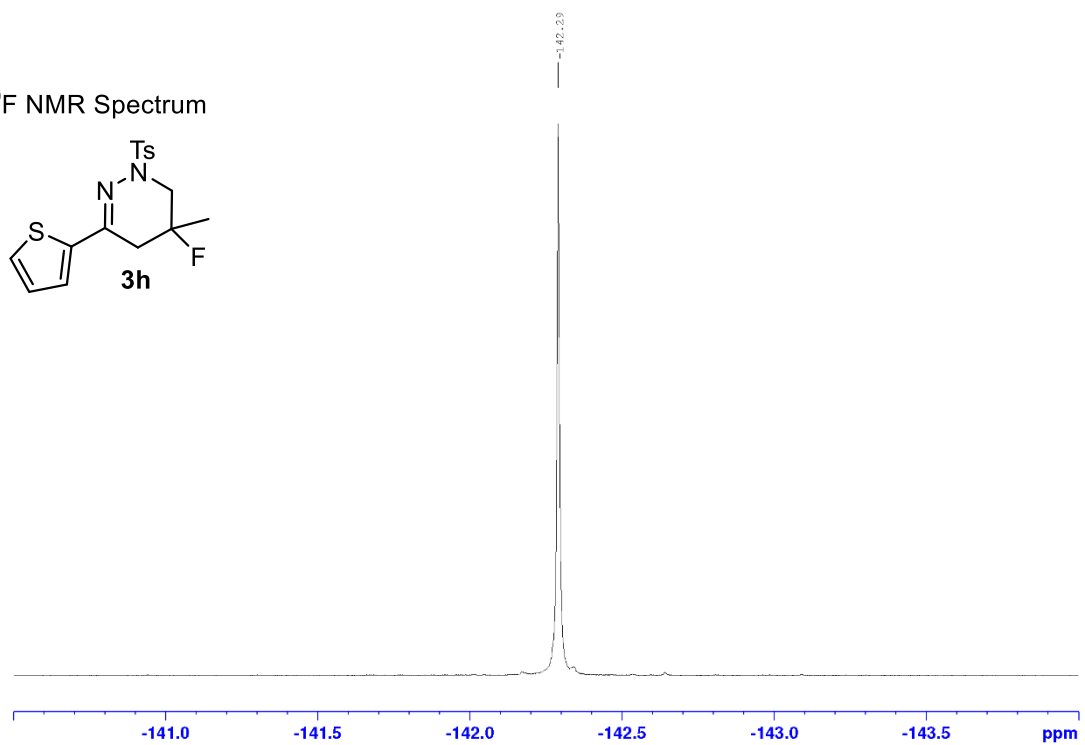

# <sup>1</sup>H NMR Spectrum

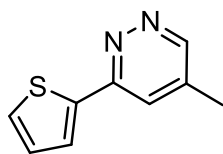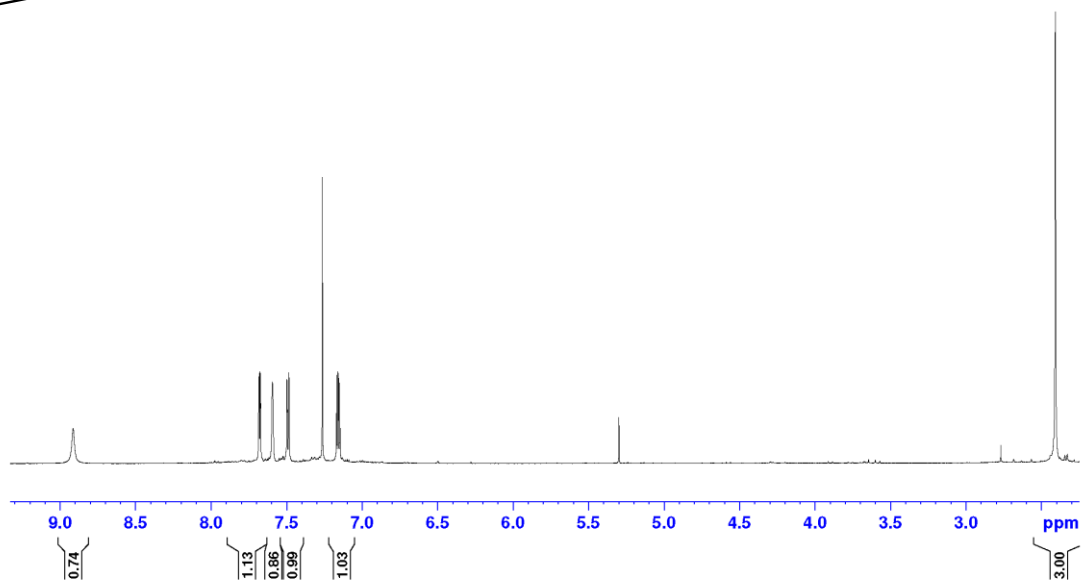

# <sup>13</sup>C NMR Spectrum

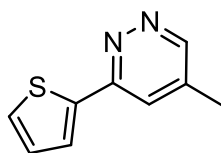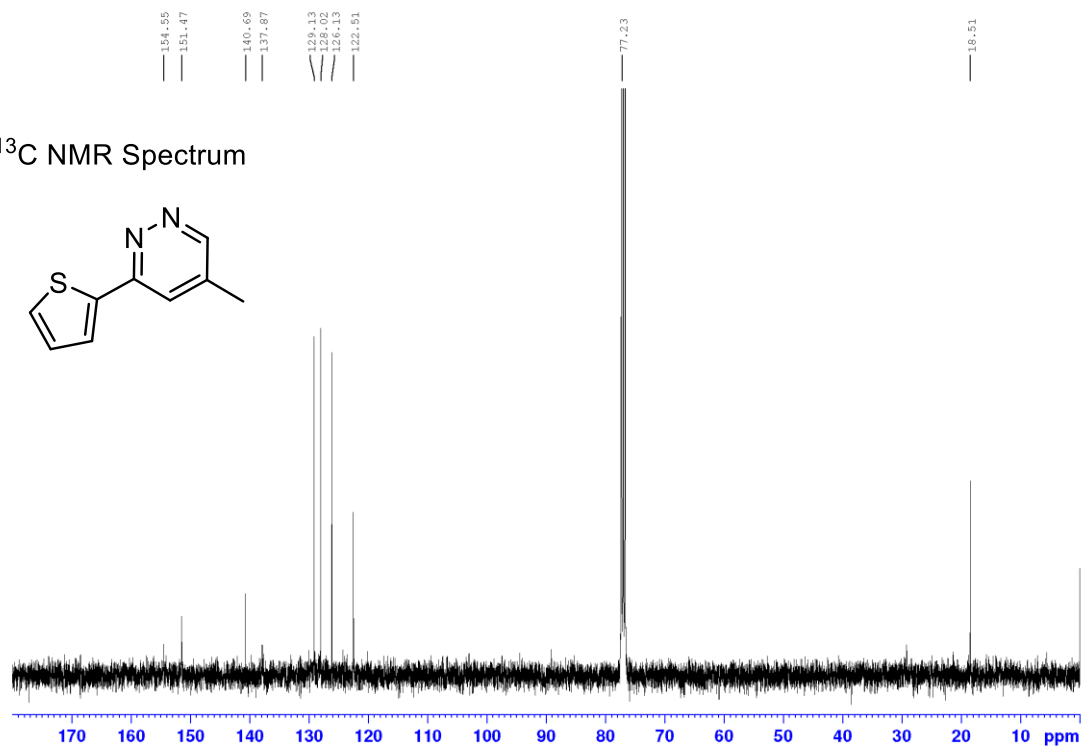

# <sup>1</sup>H NMR Spectrum

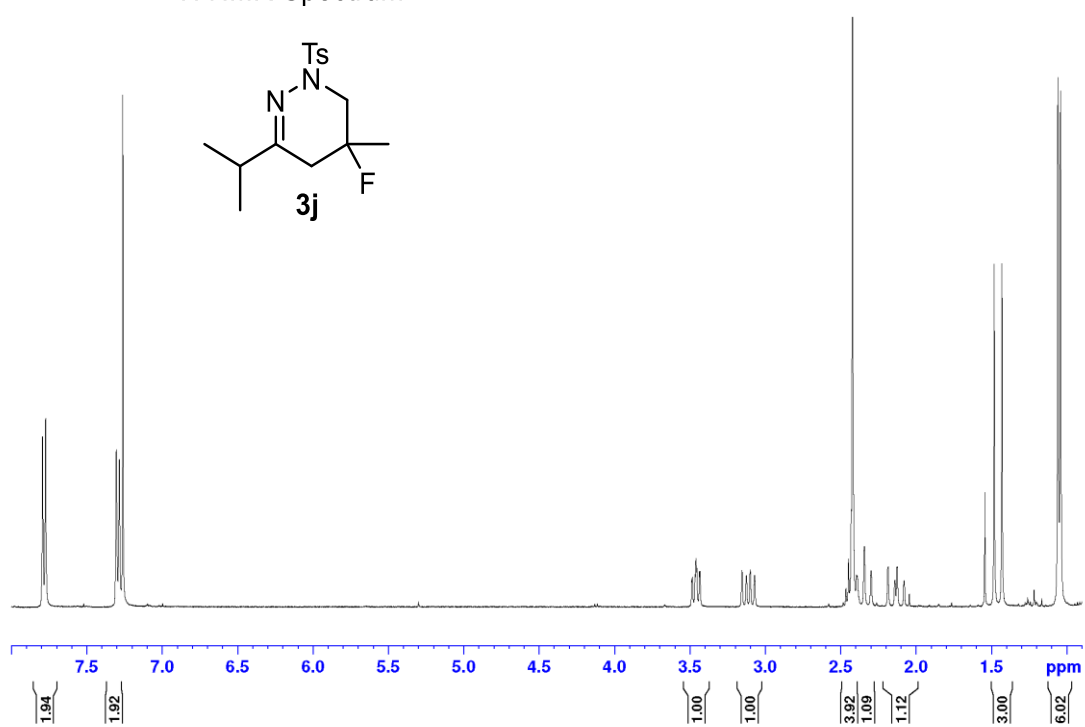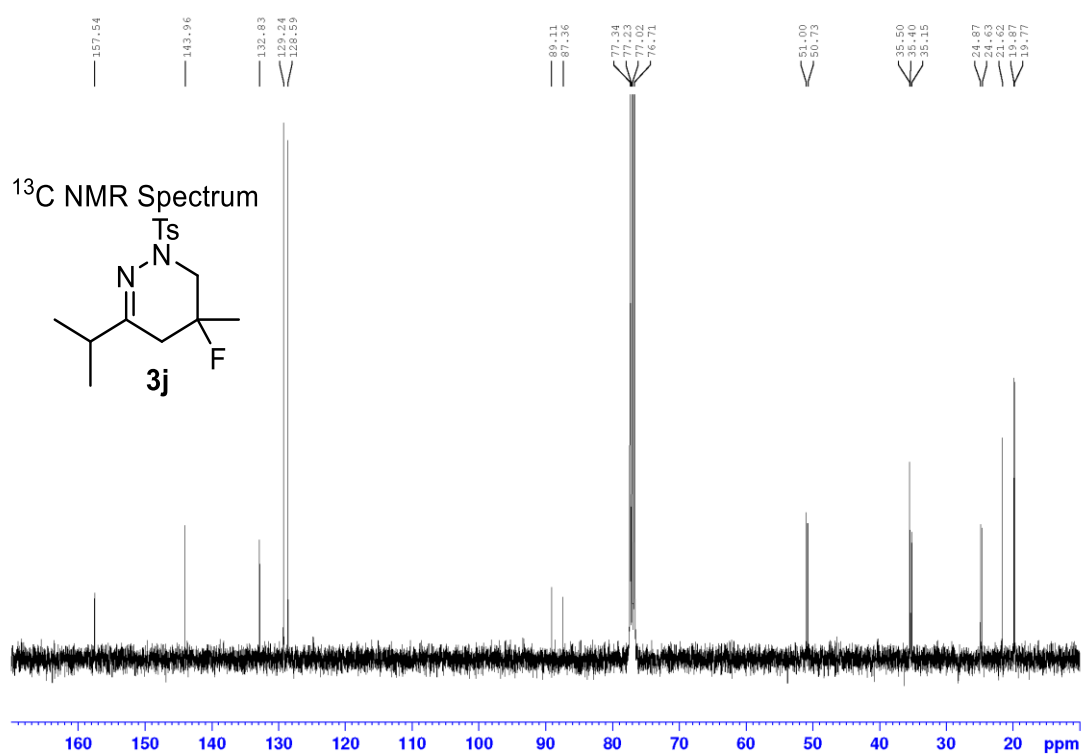

<sup>19</sup>F NMR Spectrum

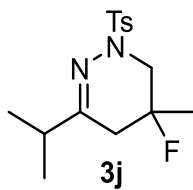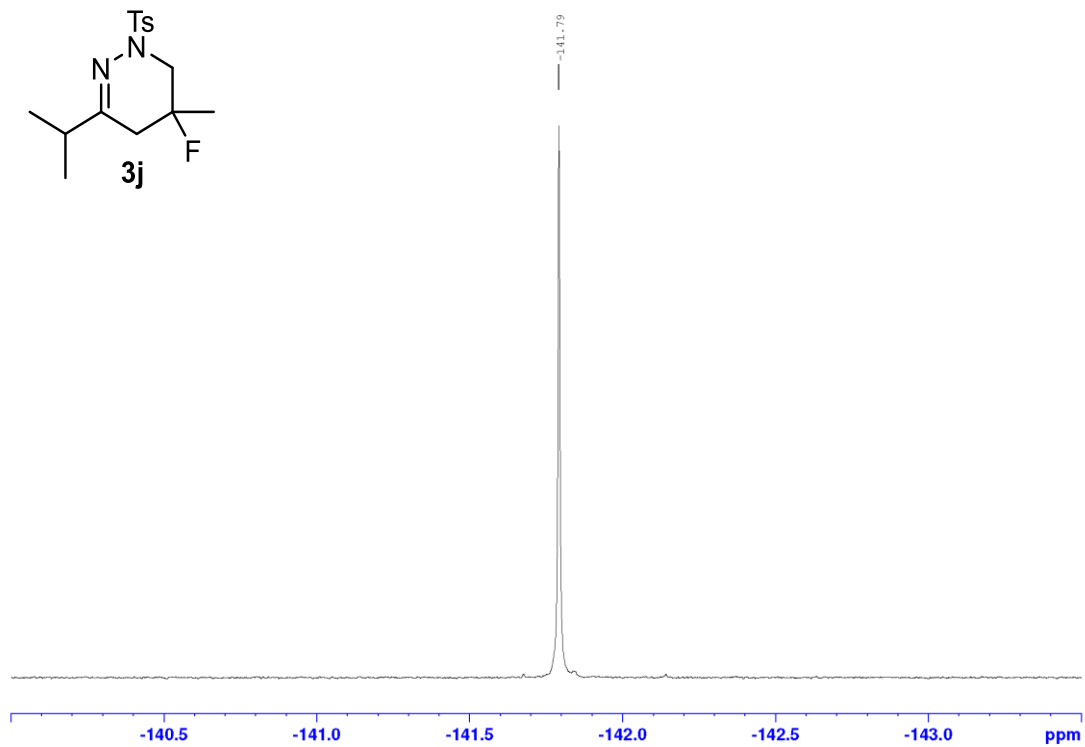

<sup>1</sup>H NMR Spectrum

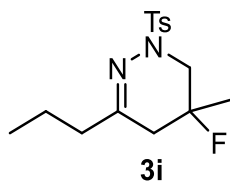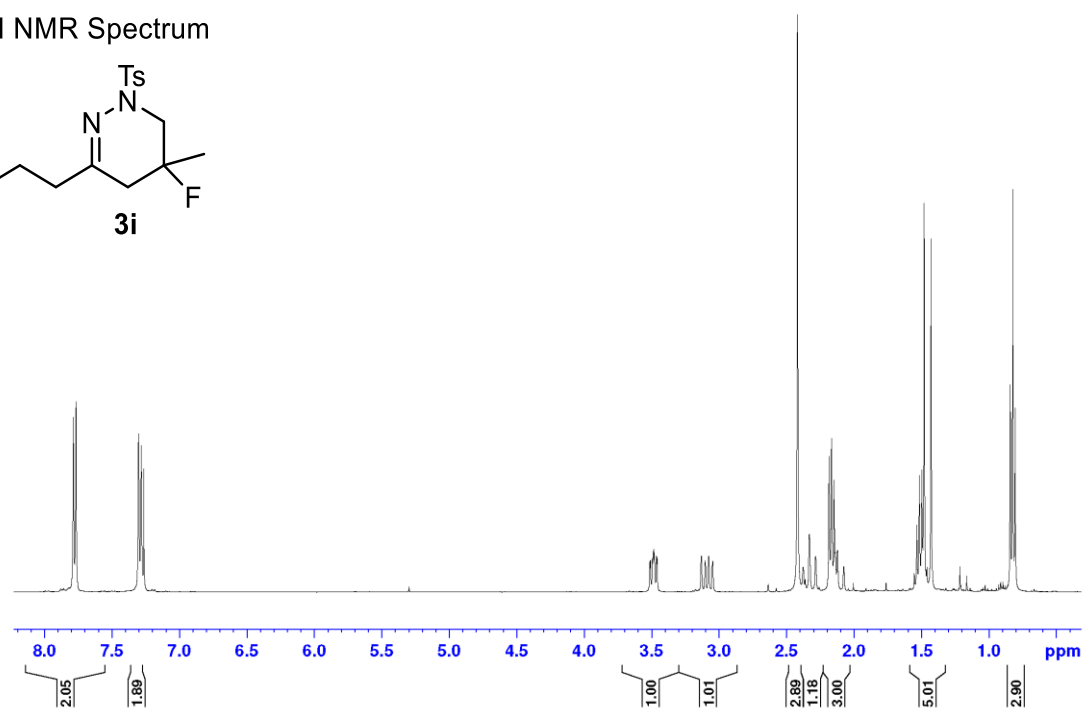

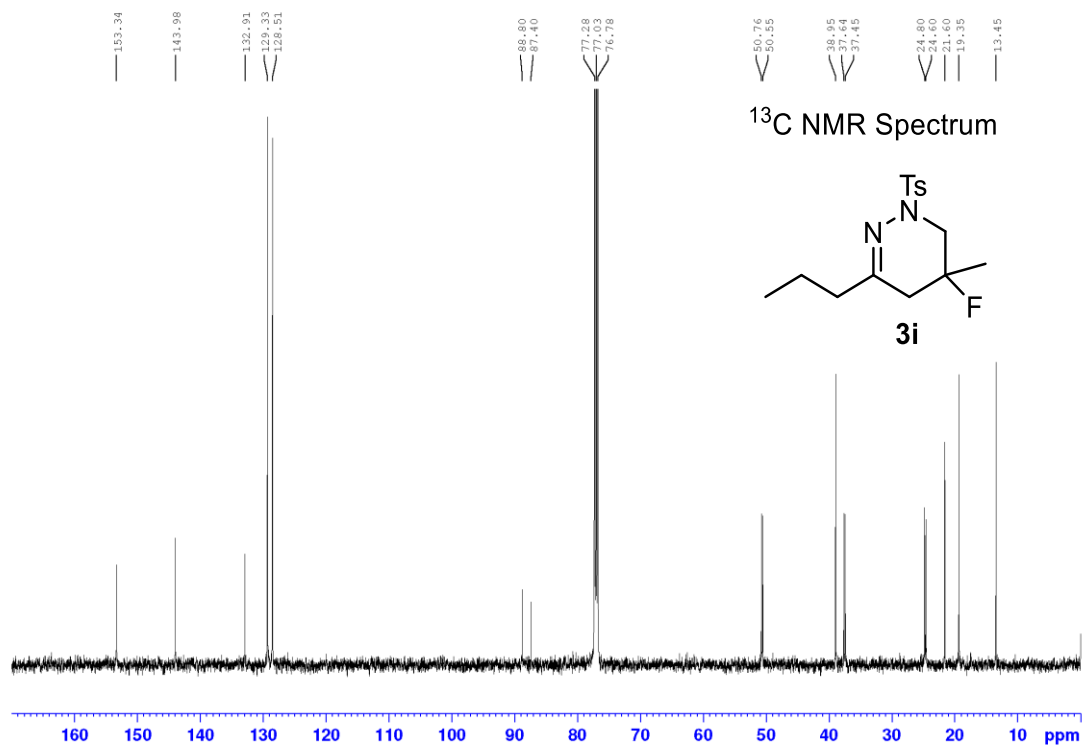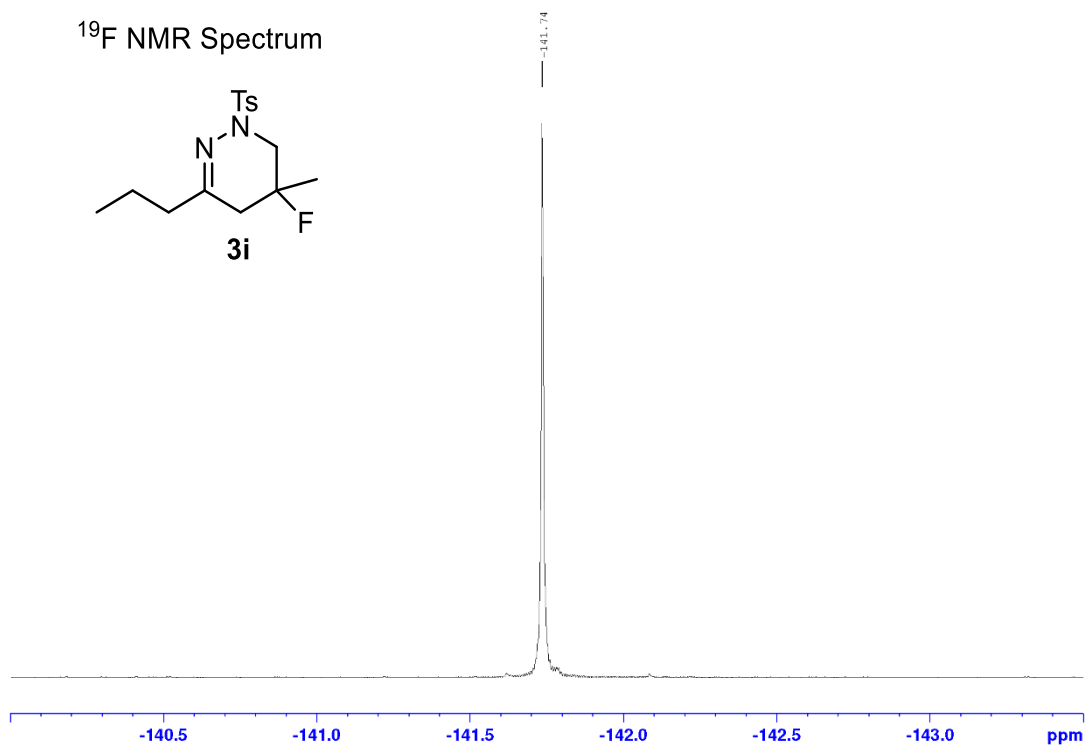

# <sup>1</sup>H NMR Spectrum

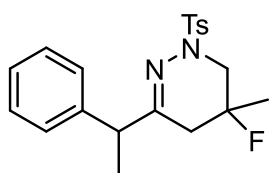

3k Diastereomer #1

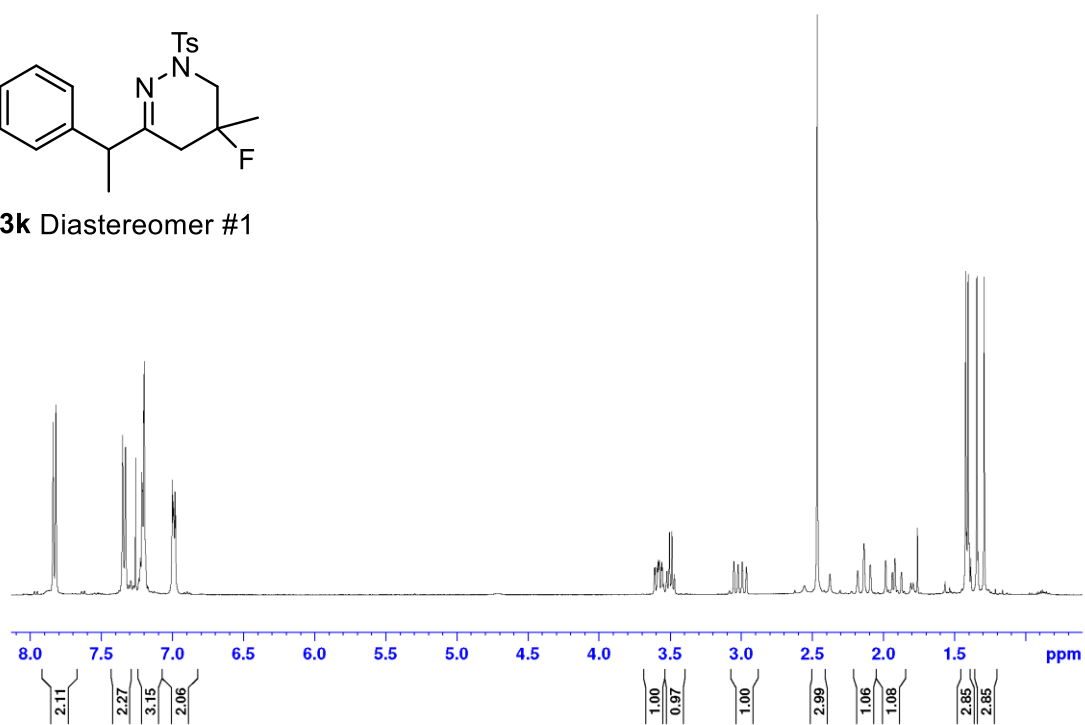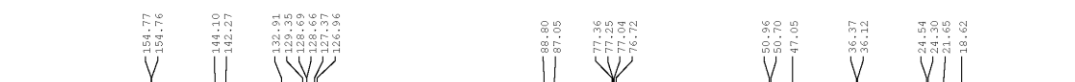

# <sup>13</sup>C NMR Spectrum

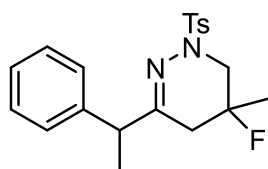

3k Diastereomer #1

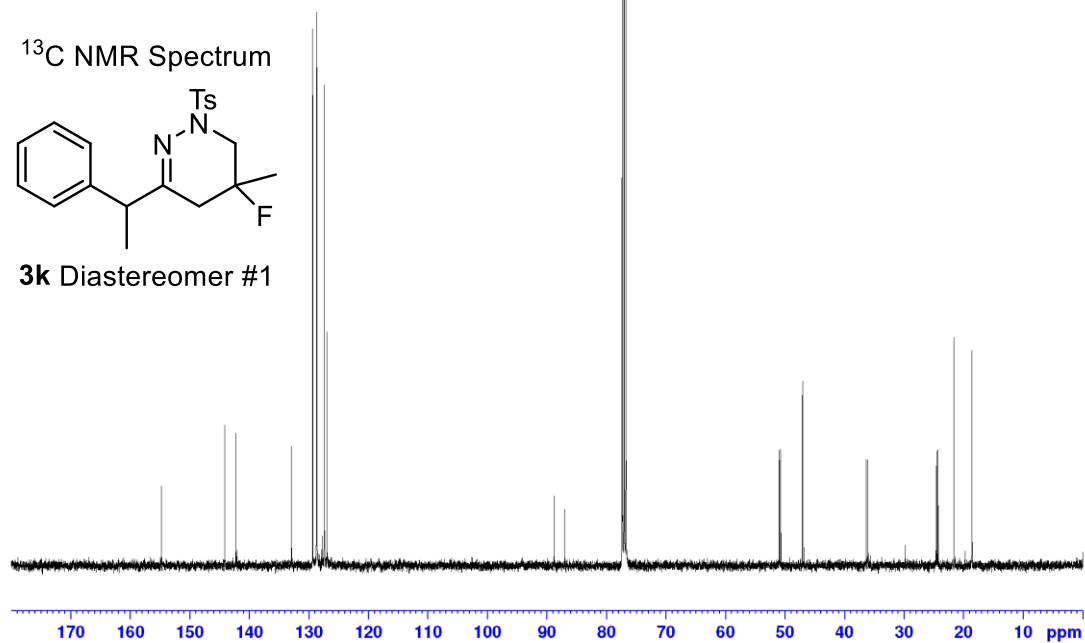

<sup>19</sup>F NMR Spectrum

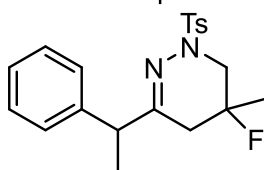

**3k Diastereomer #1**

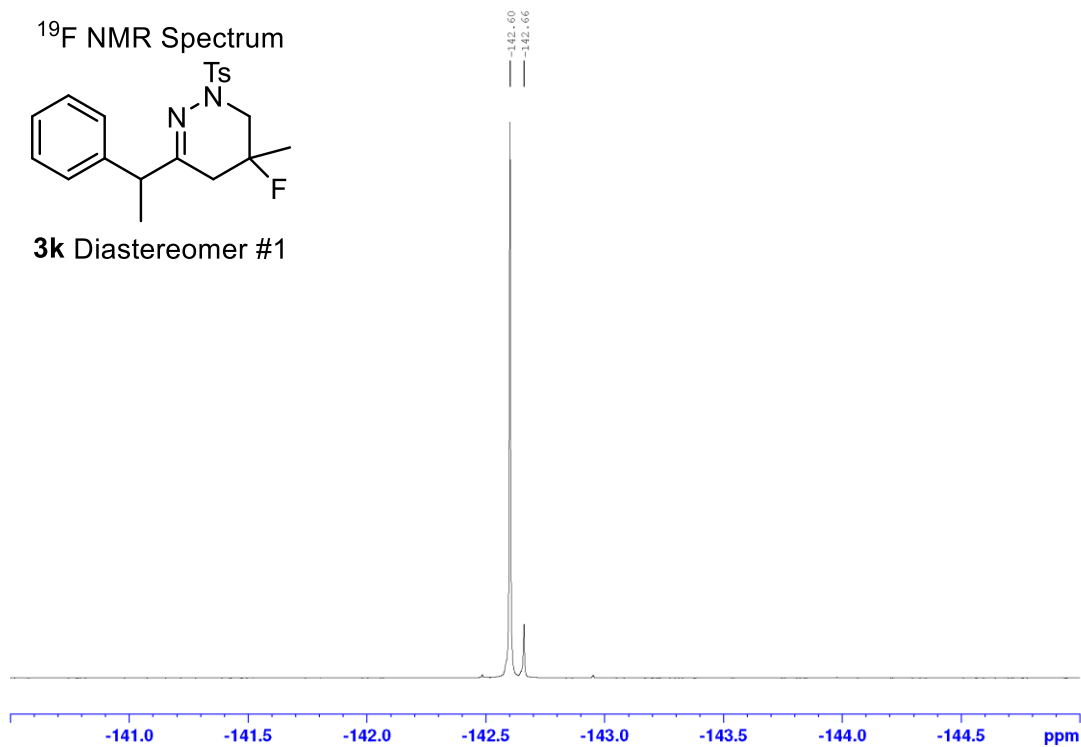

<sup>1</sup>H NMR Spectrum

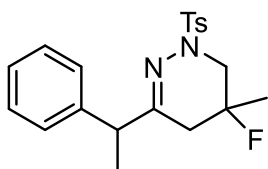

**3k Diastereomer #2**

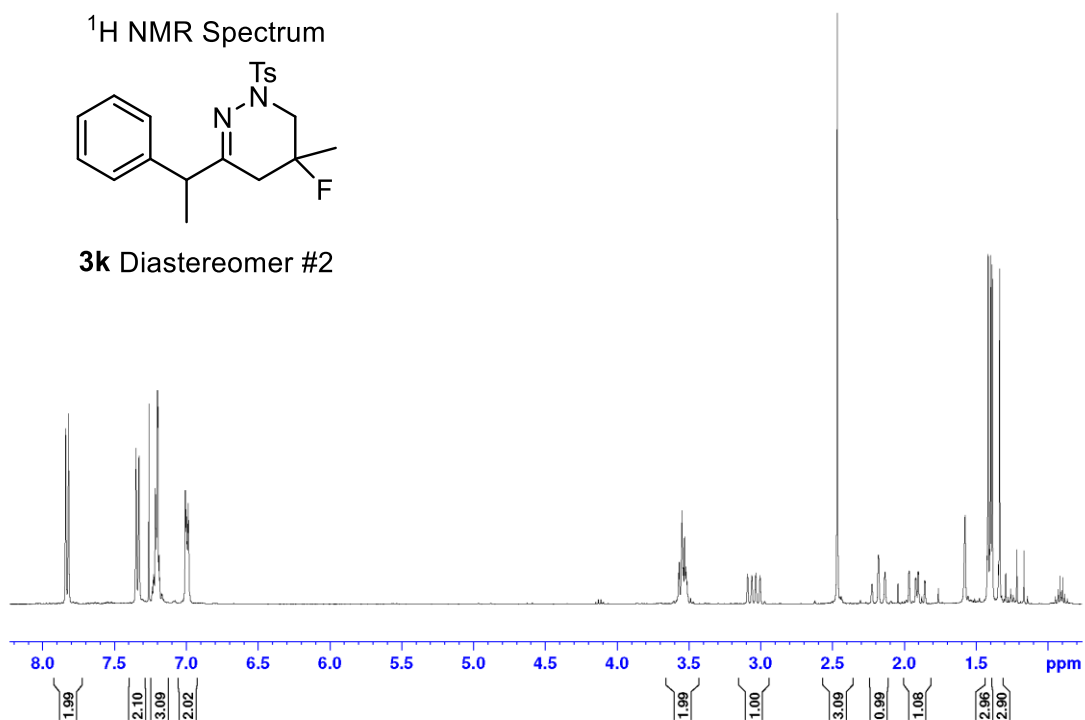

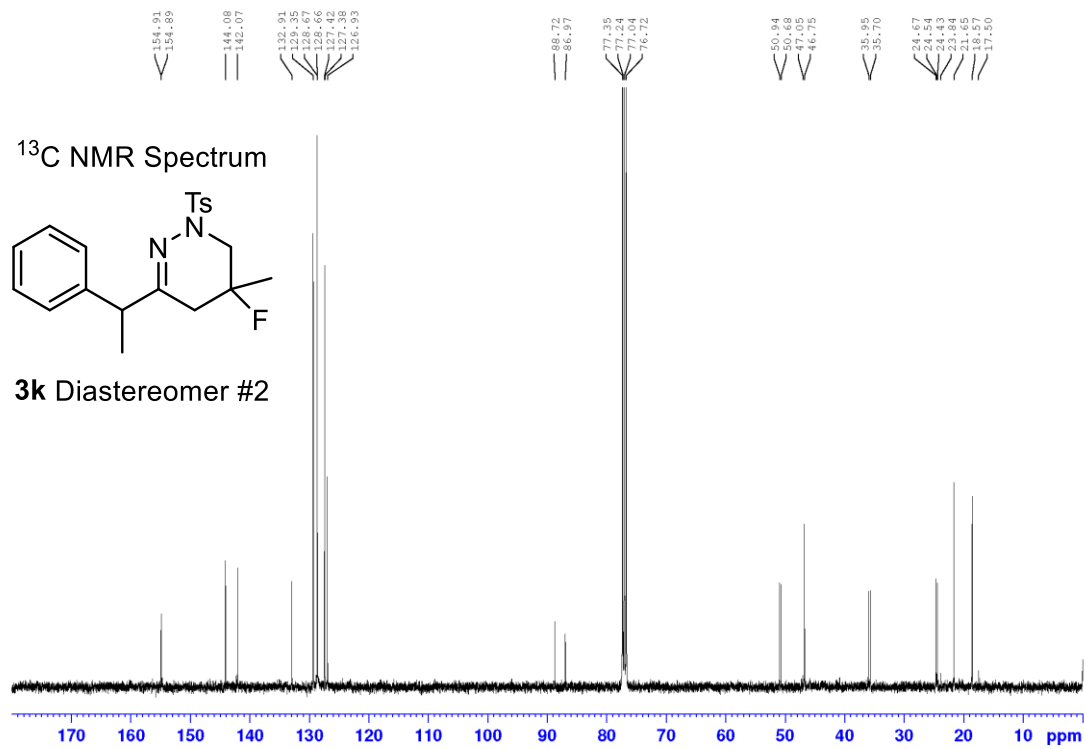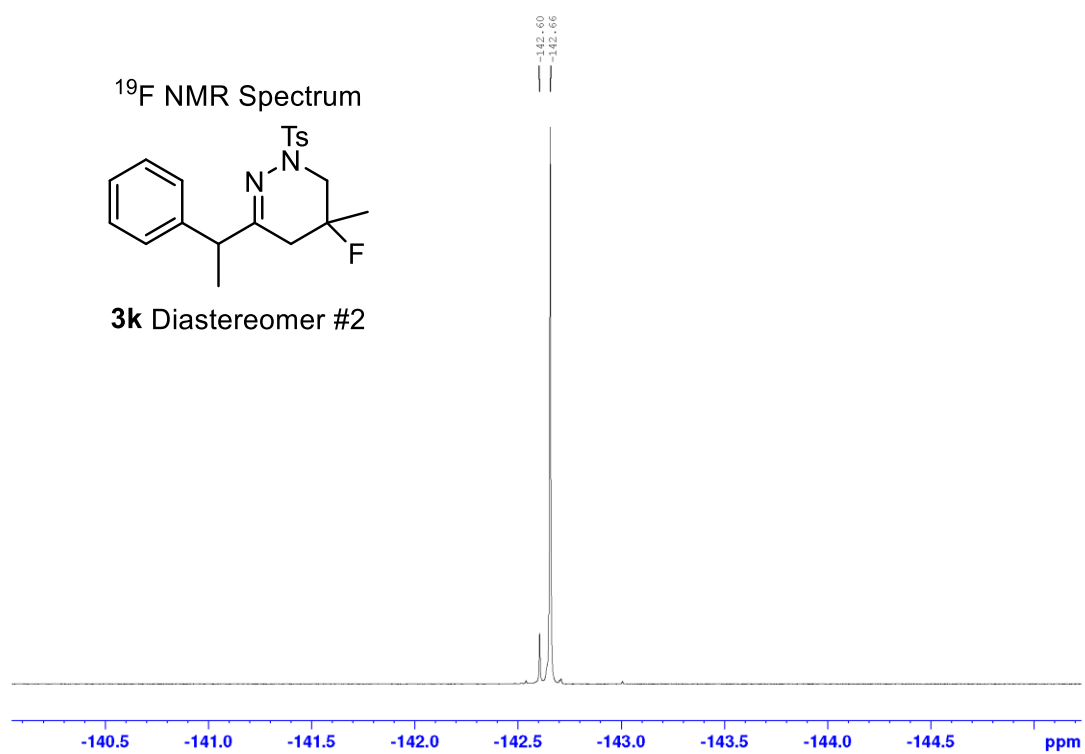



# <sup>1</sup>H NMR Spectrum

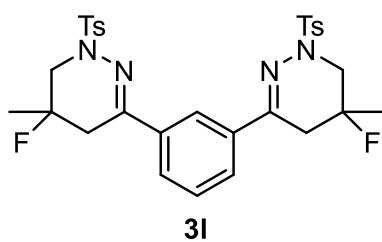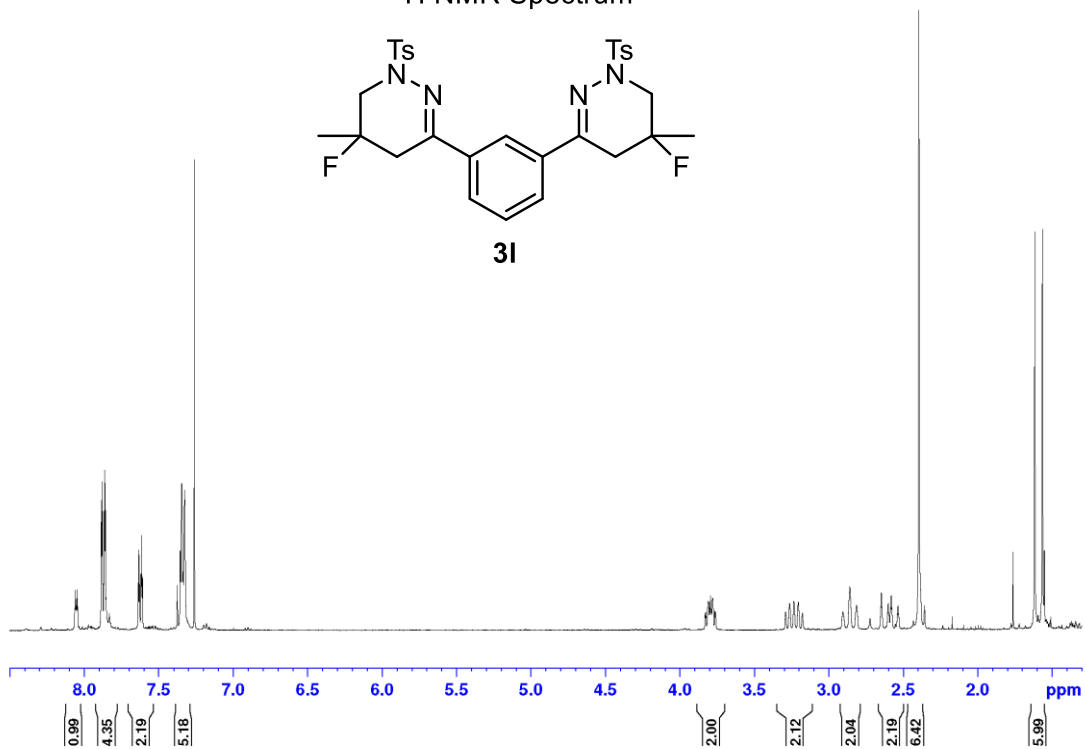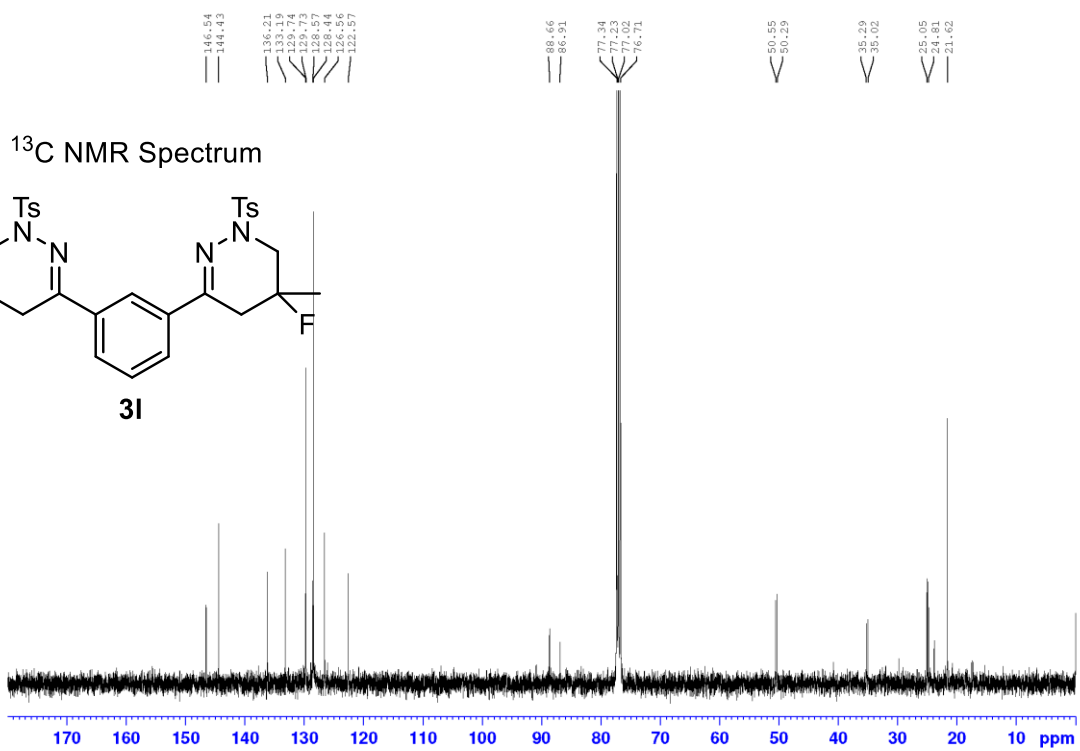

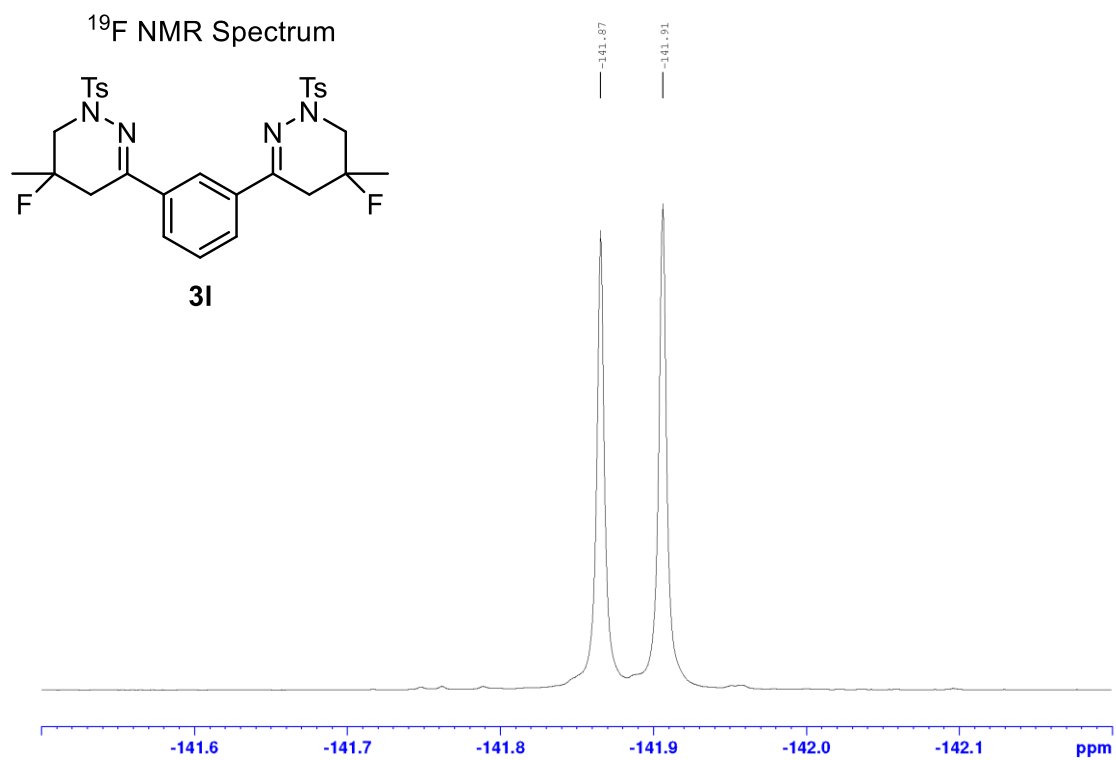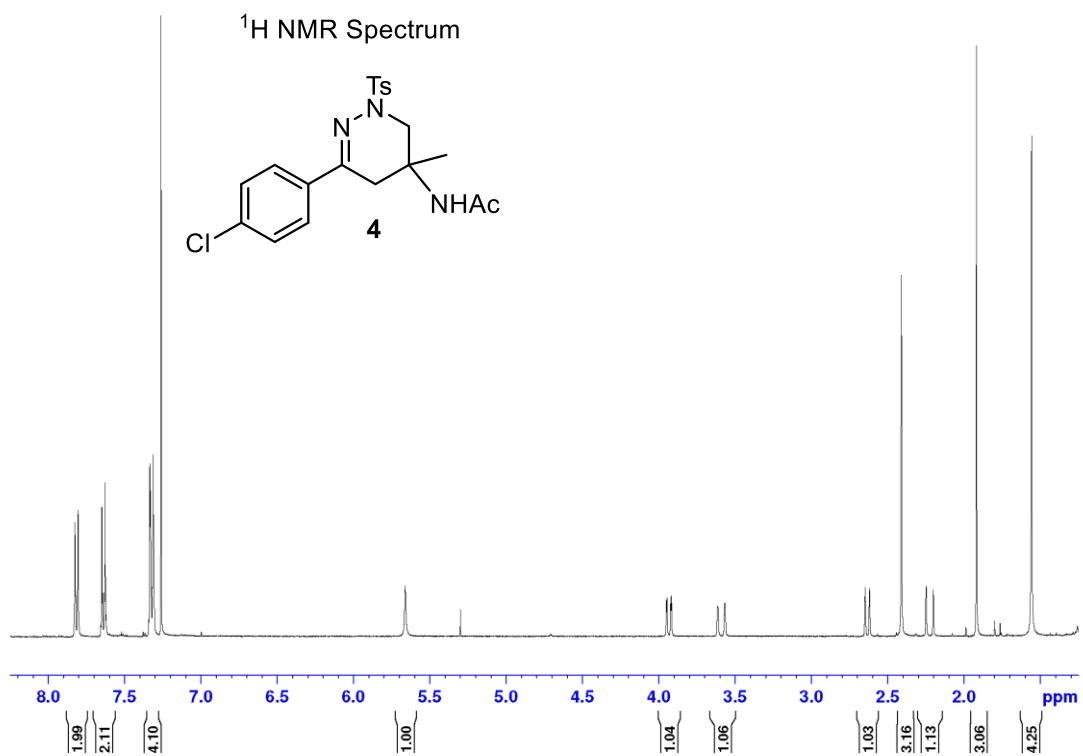

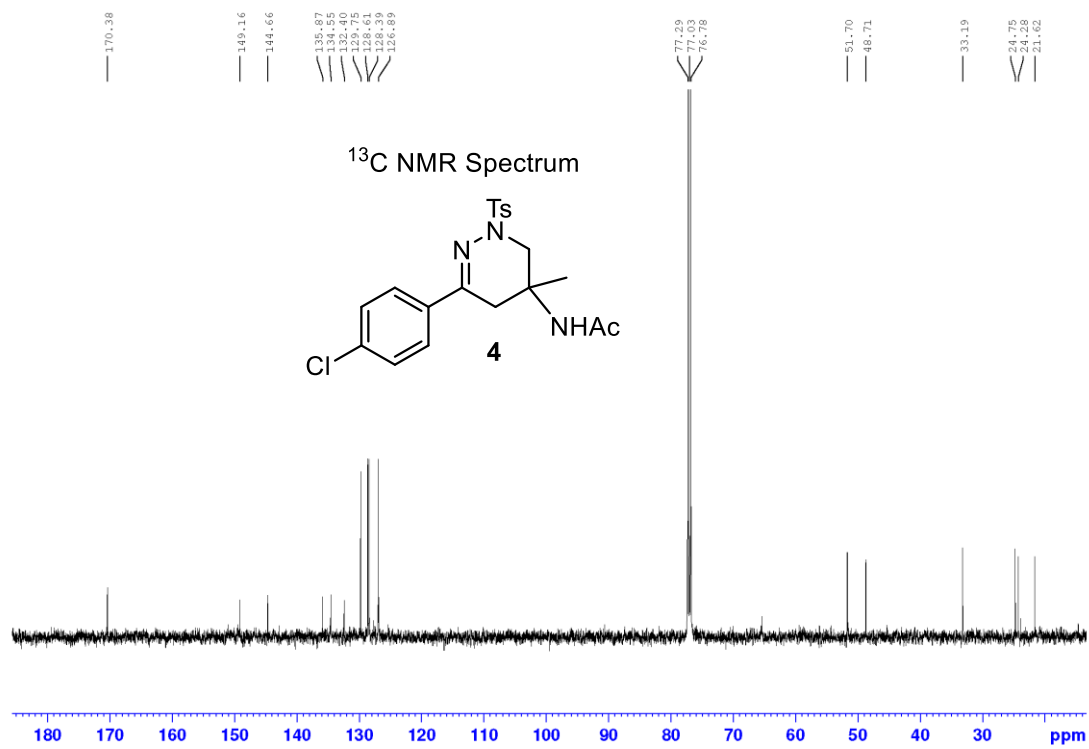

<sup>1</sup>H NMR Spectrum

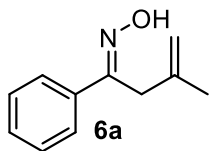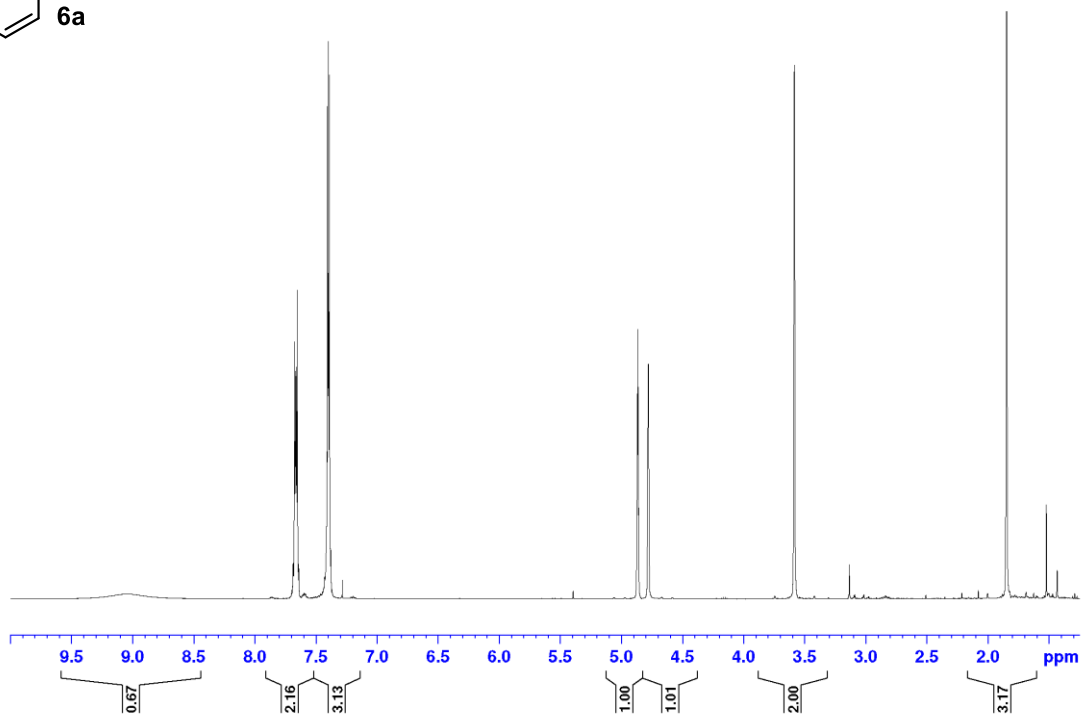

<sup>13</sup>C NMR Spectrum

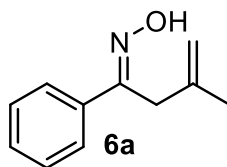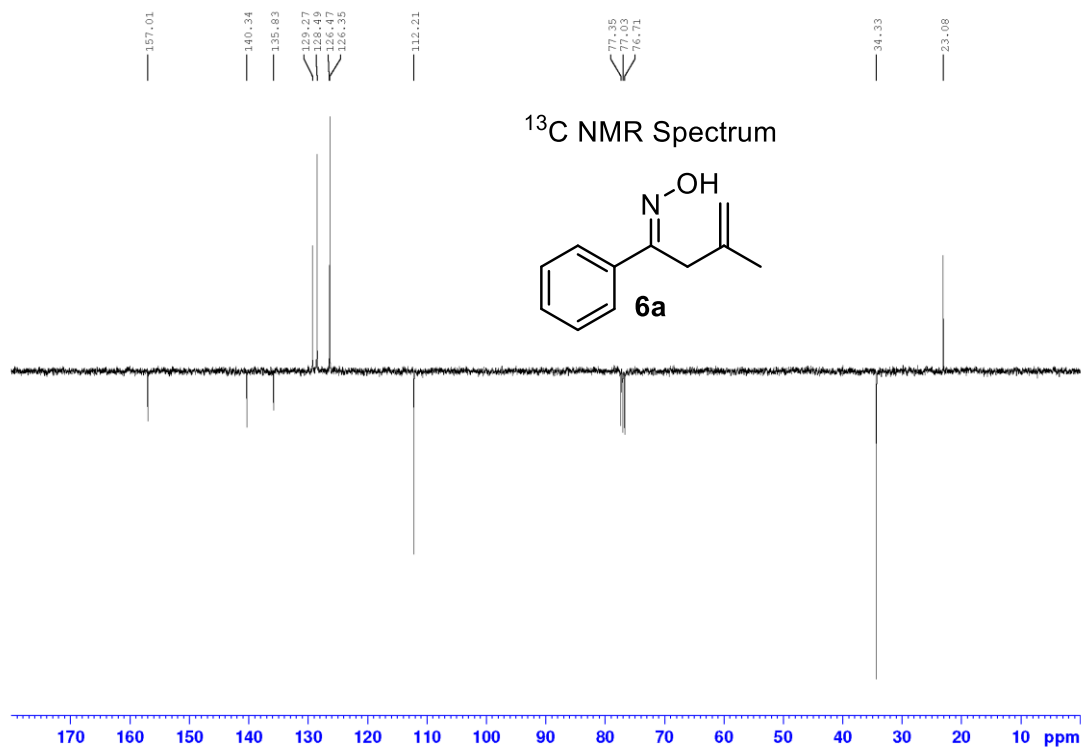

# <sup>1</sup>H NMR Spectrum

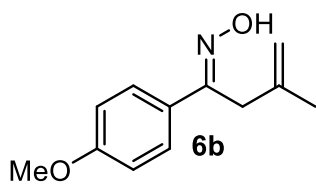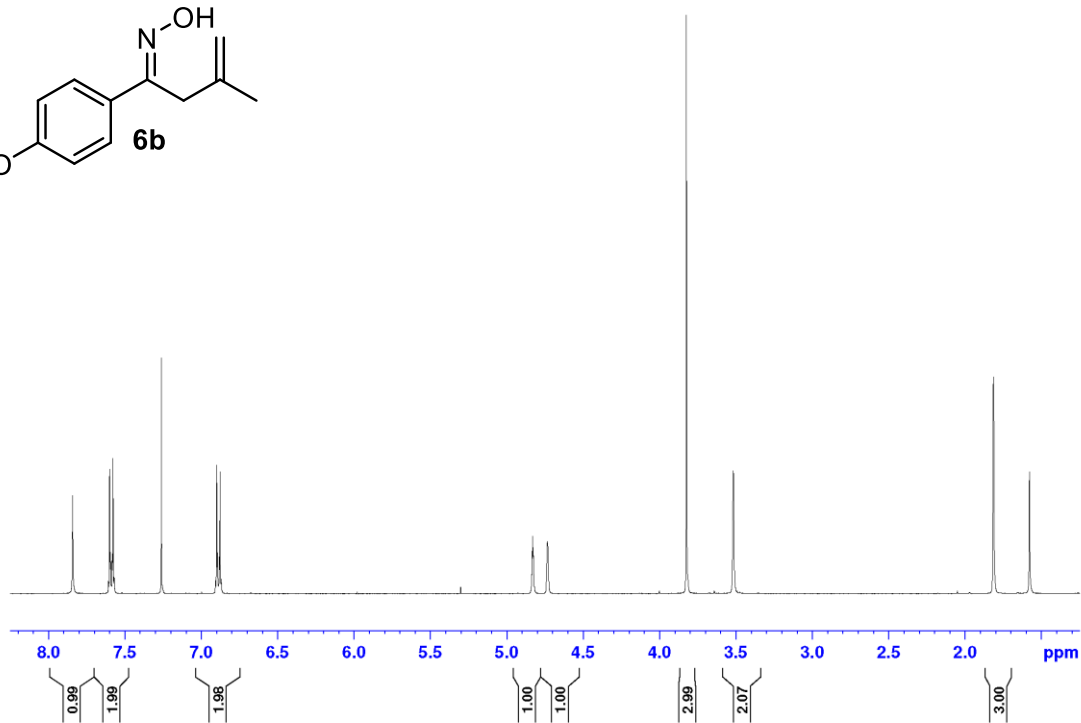

# <sup>13</sup>C NMR Spectrum

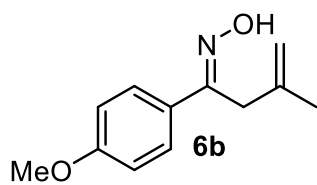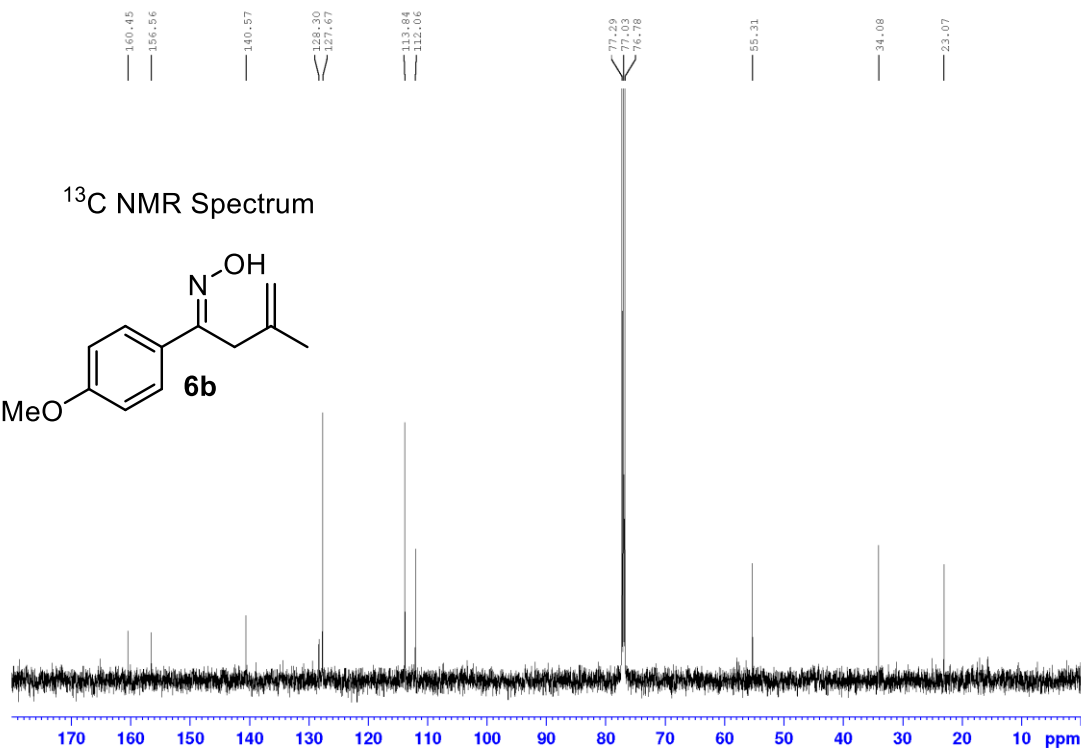

# <sup>1</sup>H NMR Spectrum

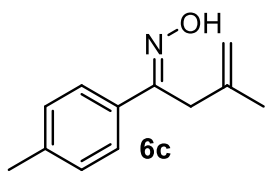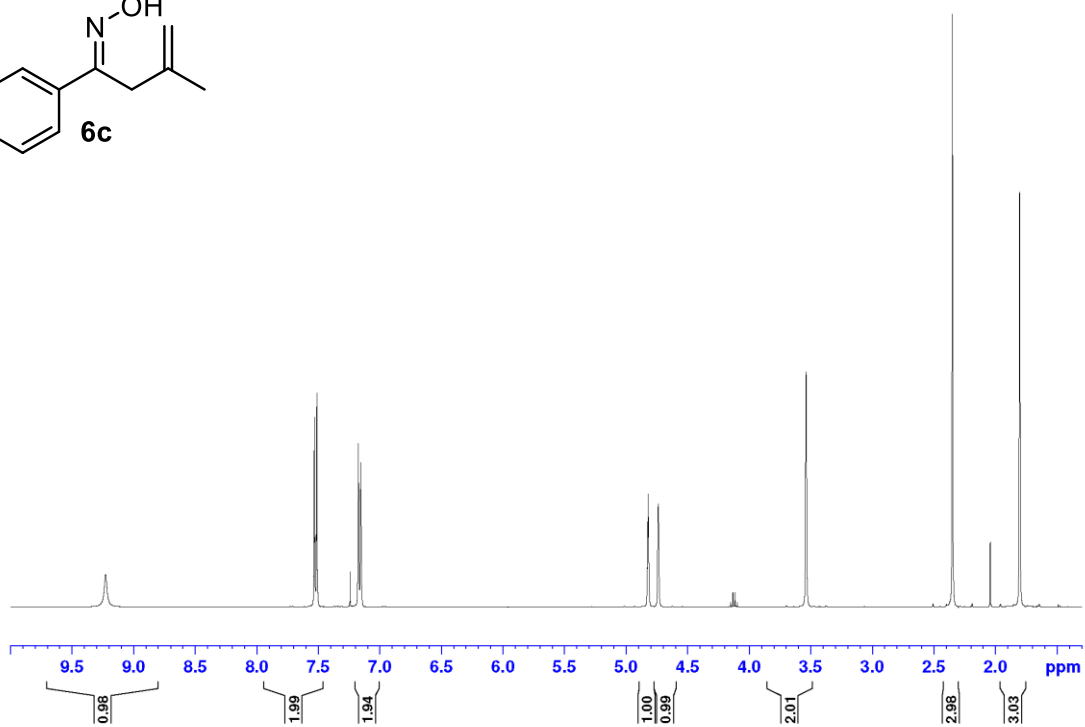

# <sup>13</sup>C NMR Spectrum

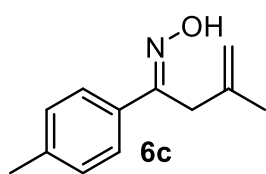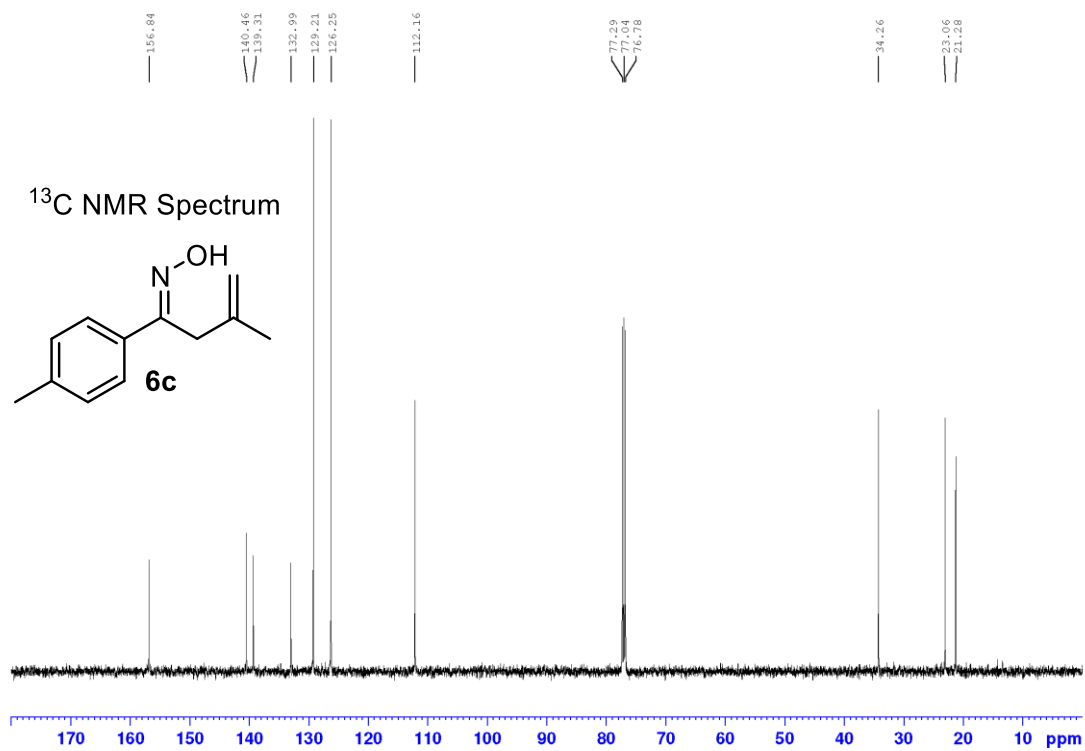

<sup>1</sup>H NMR Spectrum

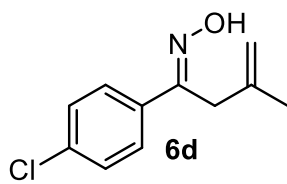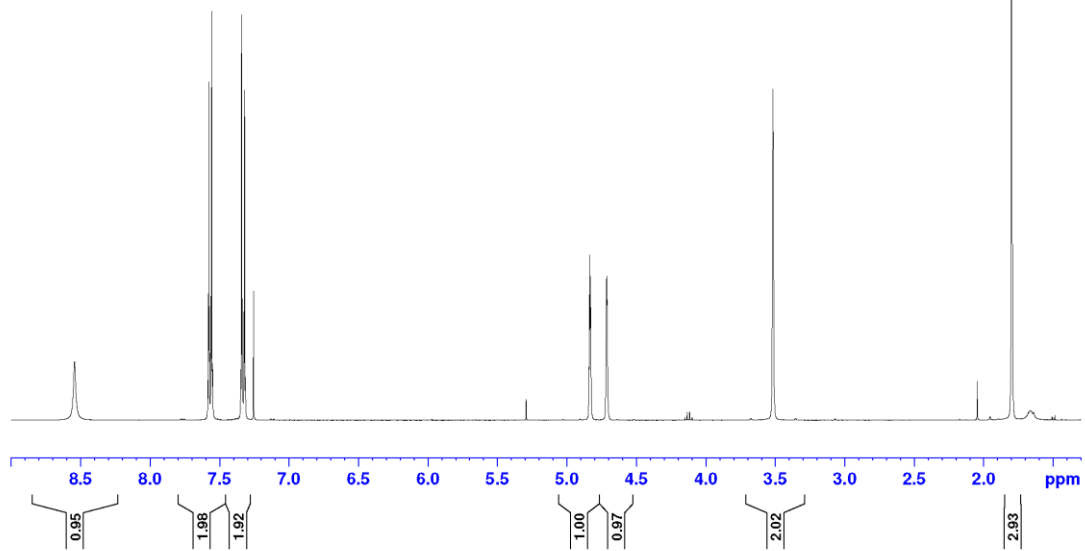

<sup>13</sup>C NMR Spectrum

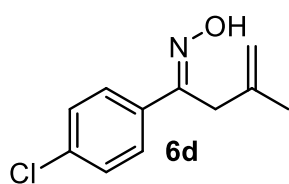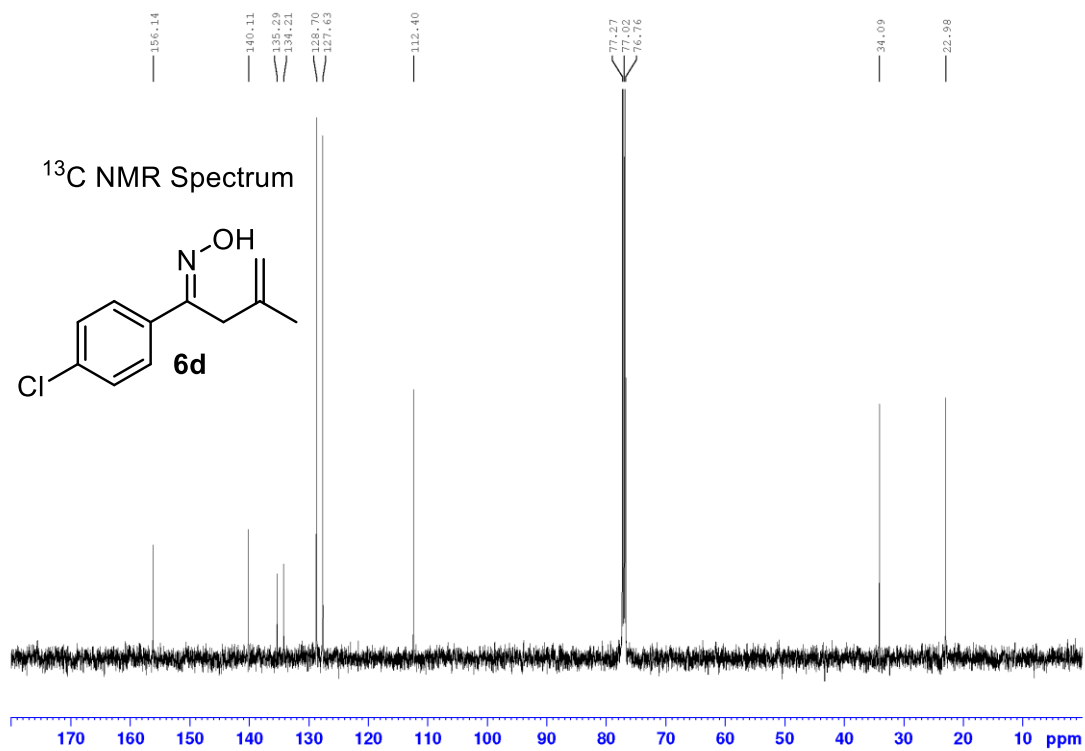

<sup>1</sup>H NMR Spectrum

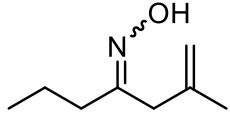

**6e**

1:1 mixture of *E/Z*

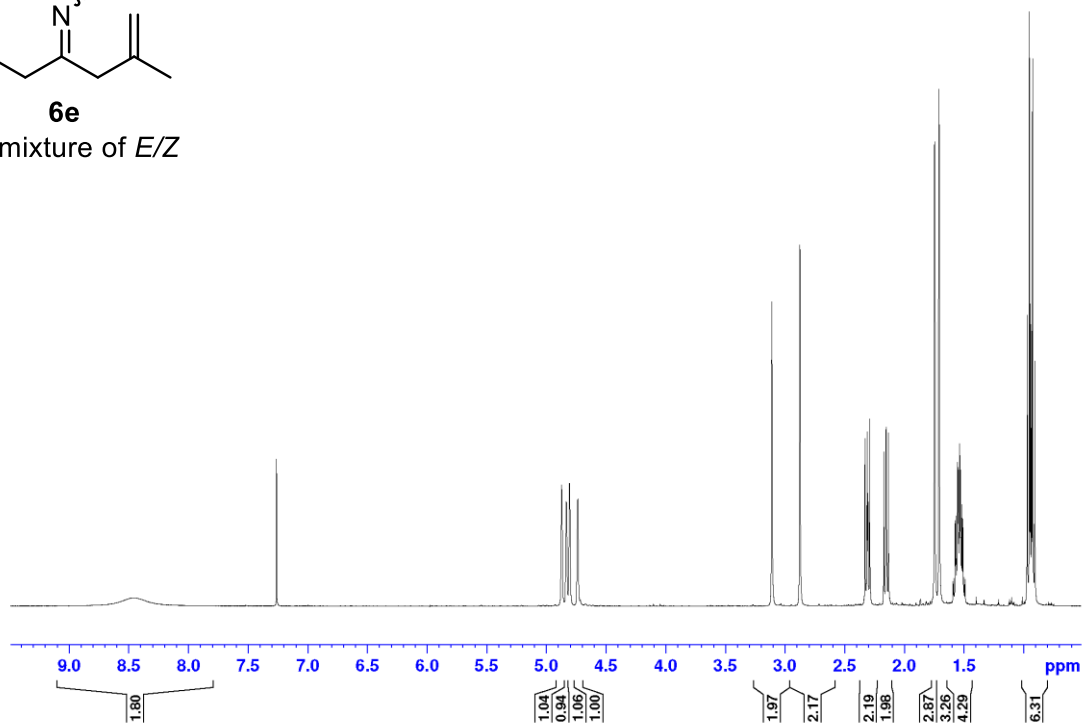

<sup>13</sup>C NMR Spectrum

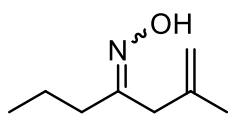

**6e**

1:1 mixture of *E/Z*

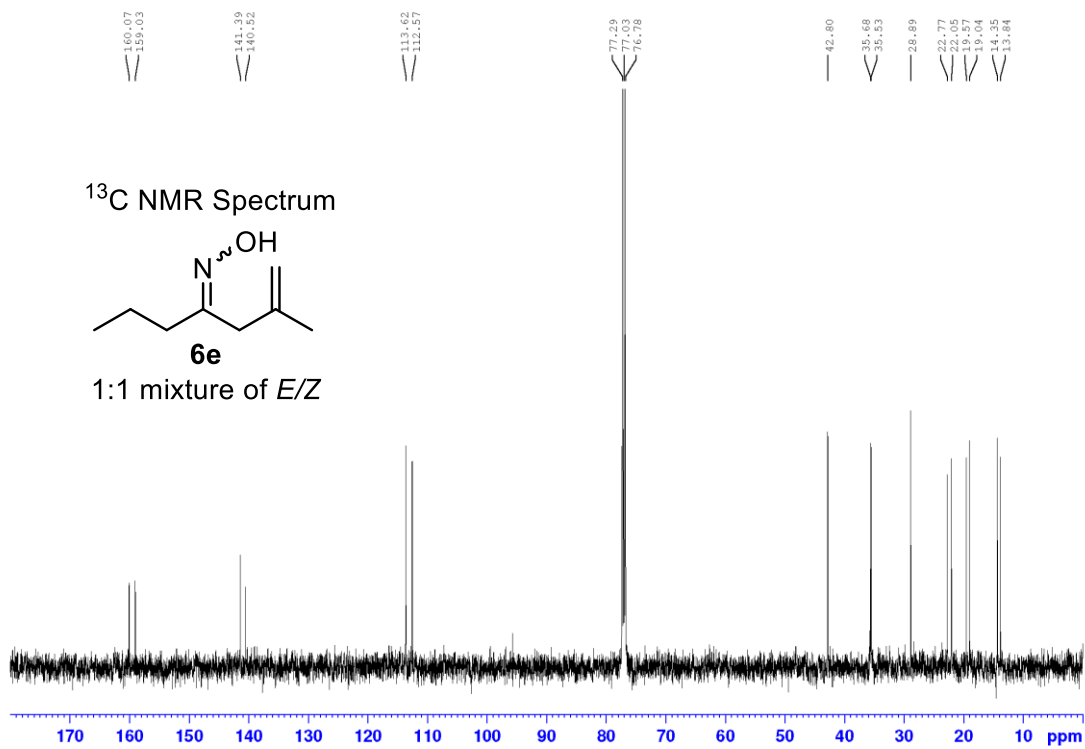



# <sup>1</sup>H NMR Spectrum

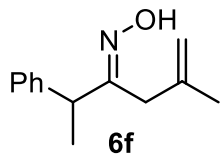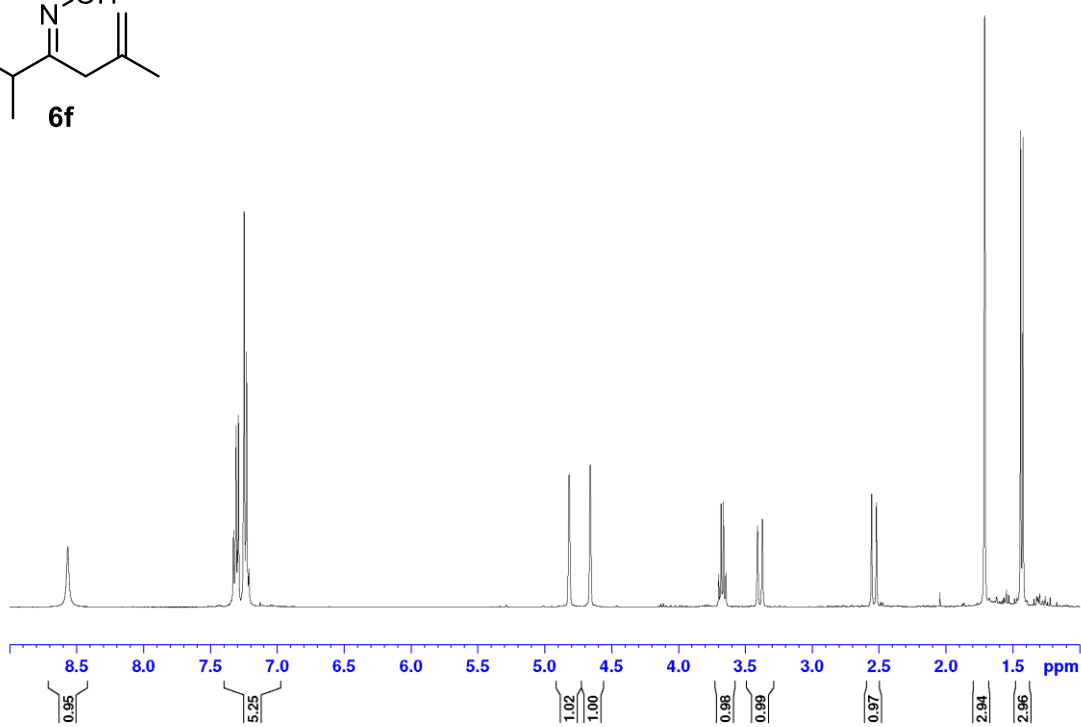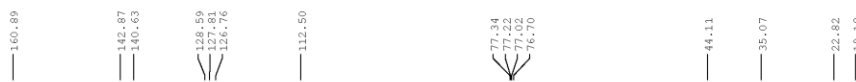

# <sup>13</sup>C NMR Spectrum

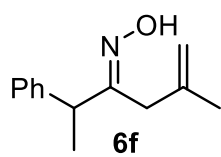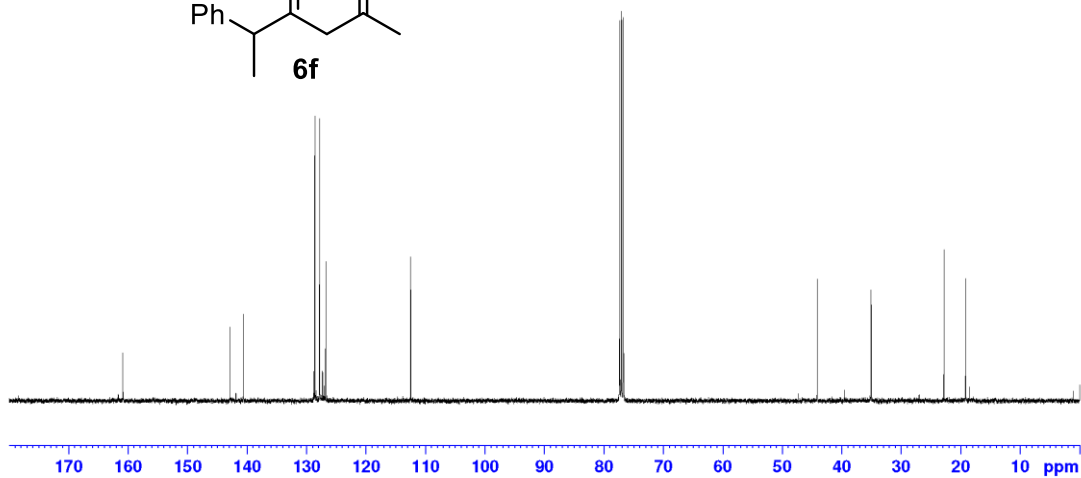

# <sup>1</sup>H NMR Spectrum

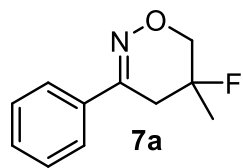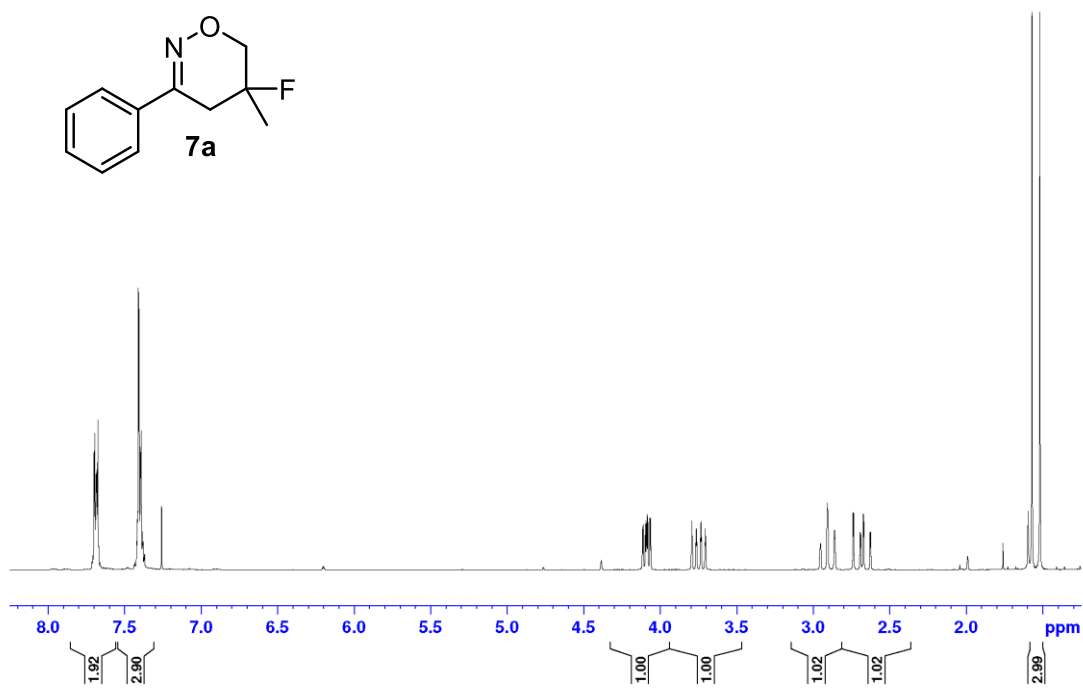

# <sup>13</sup>C NMR Spectrum

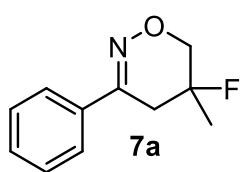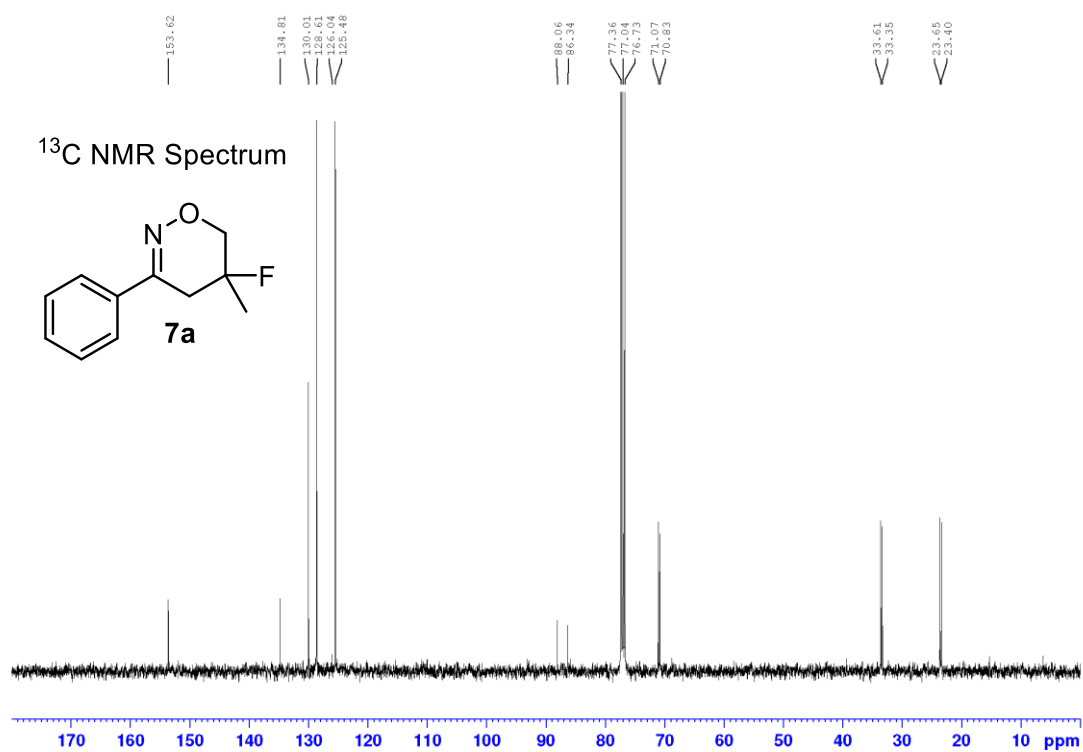

<sup>19</sup>F NMR Spectrum

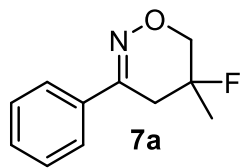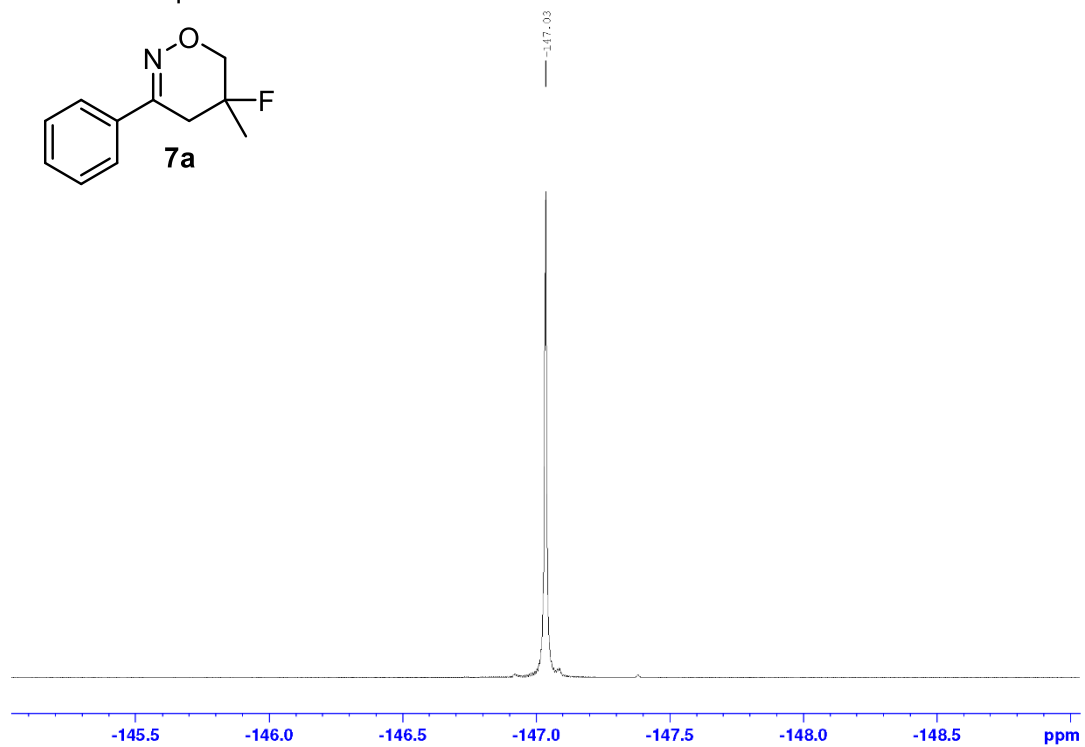

### <sup>1</sup>H NMR Spectrum

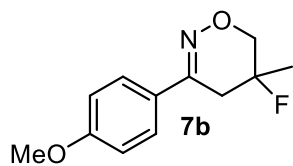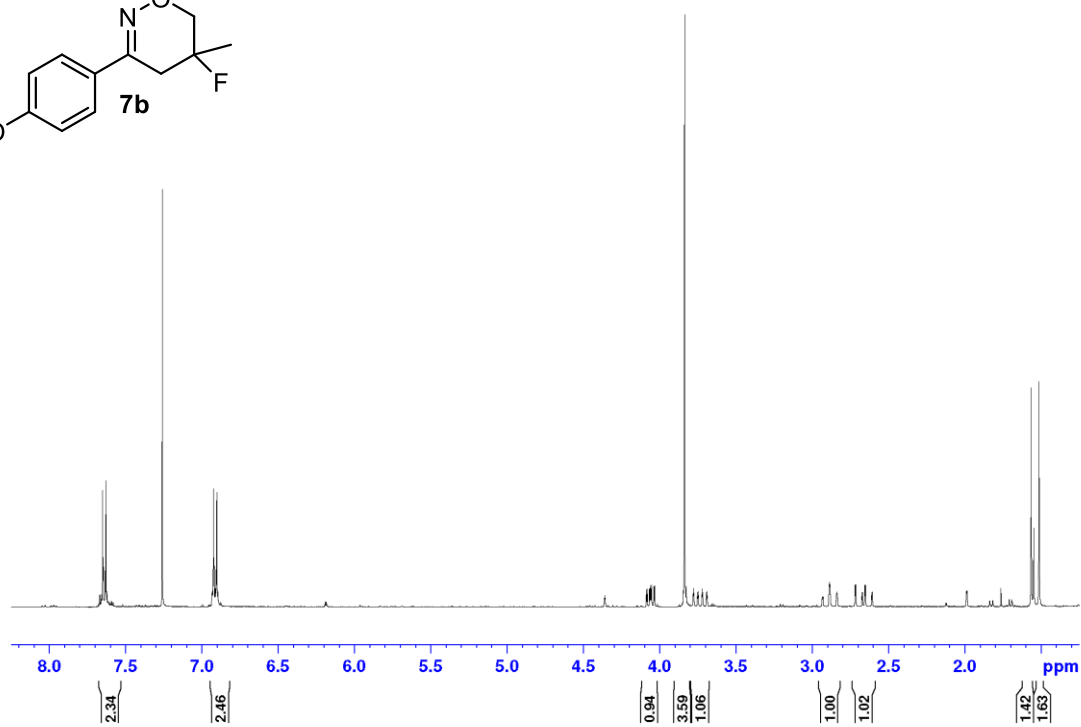

### <sup>13</sup>C NMR Spectrum

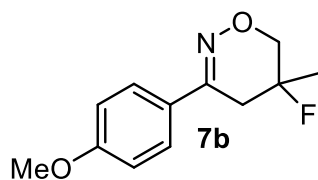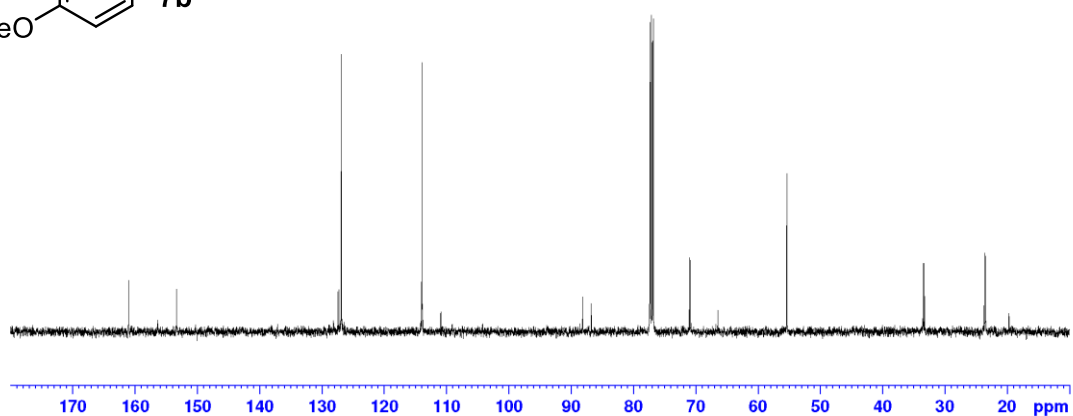

<sup>19</sup>F NMR Spectrum

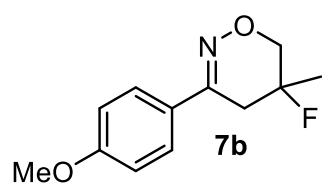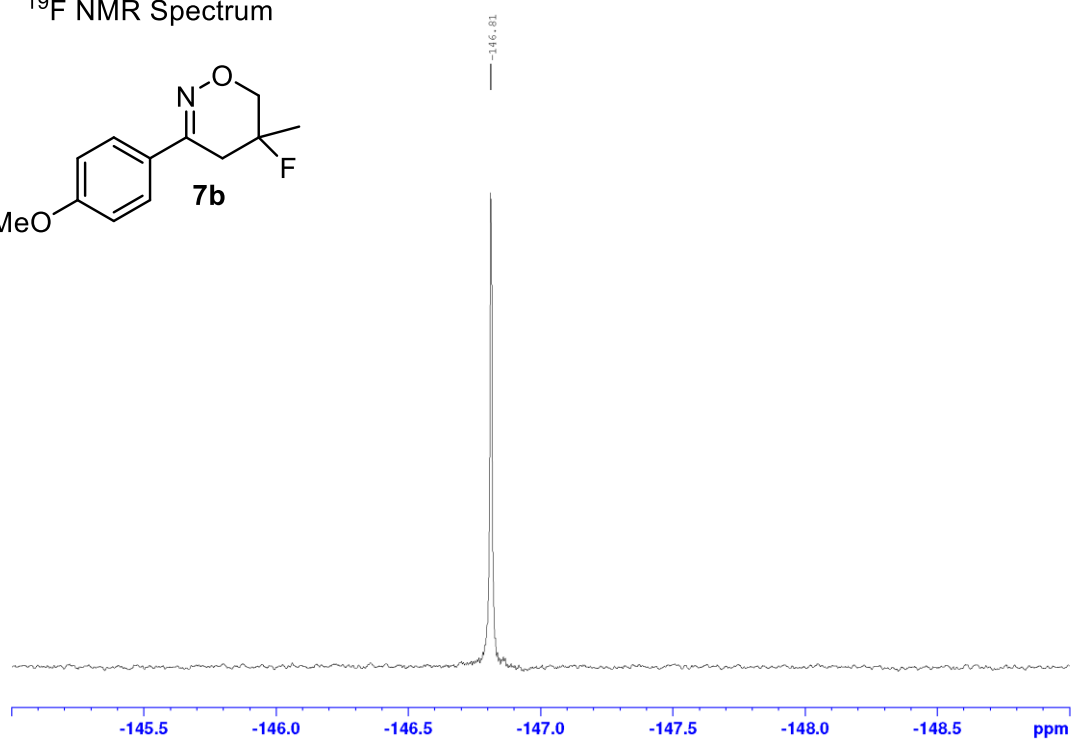

# <sup>1</sup>H NMR Spectrum

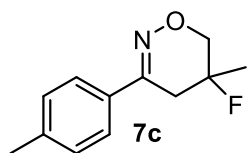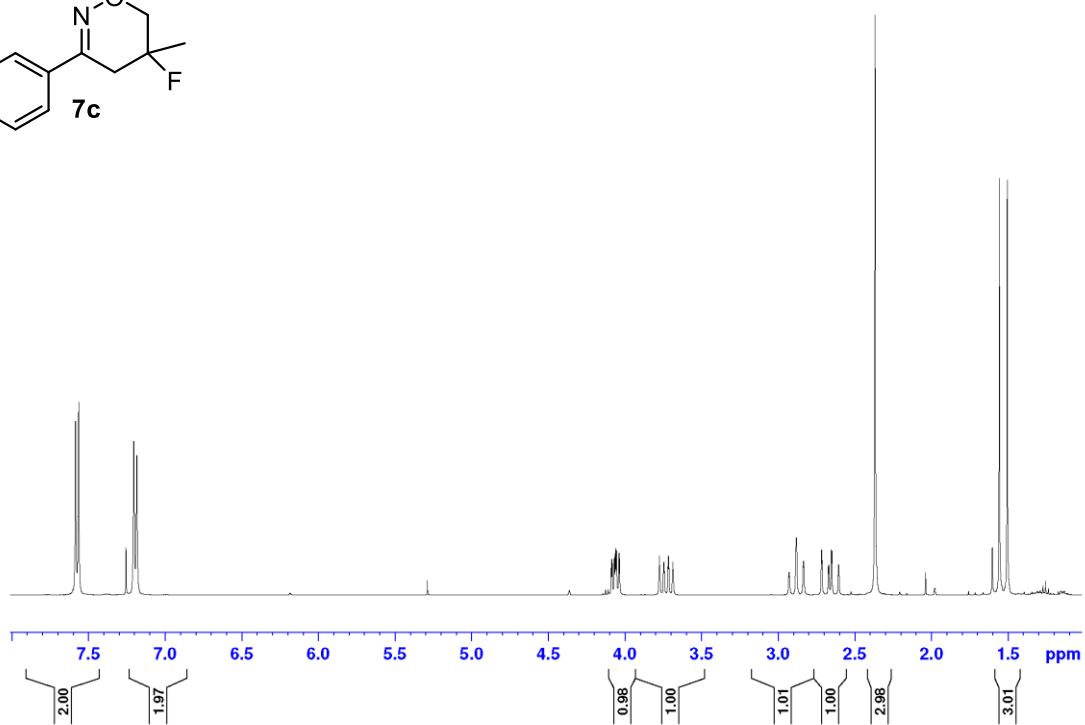

# <sup>13</sup>C NMR Spectrum

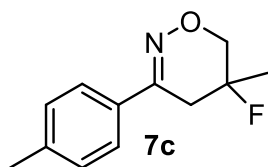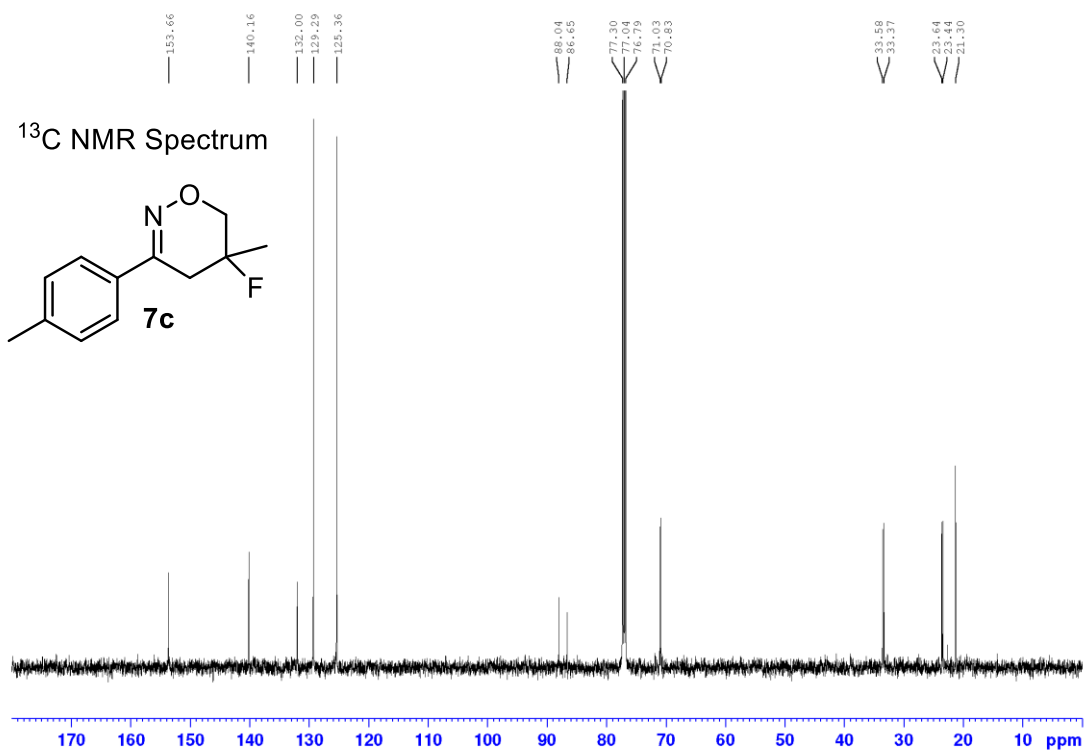

<sup>19</sup>F NMR Spectrum

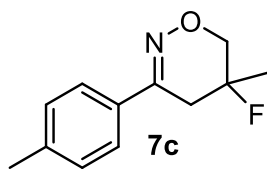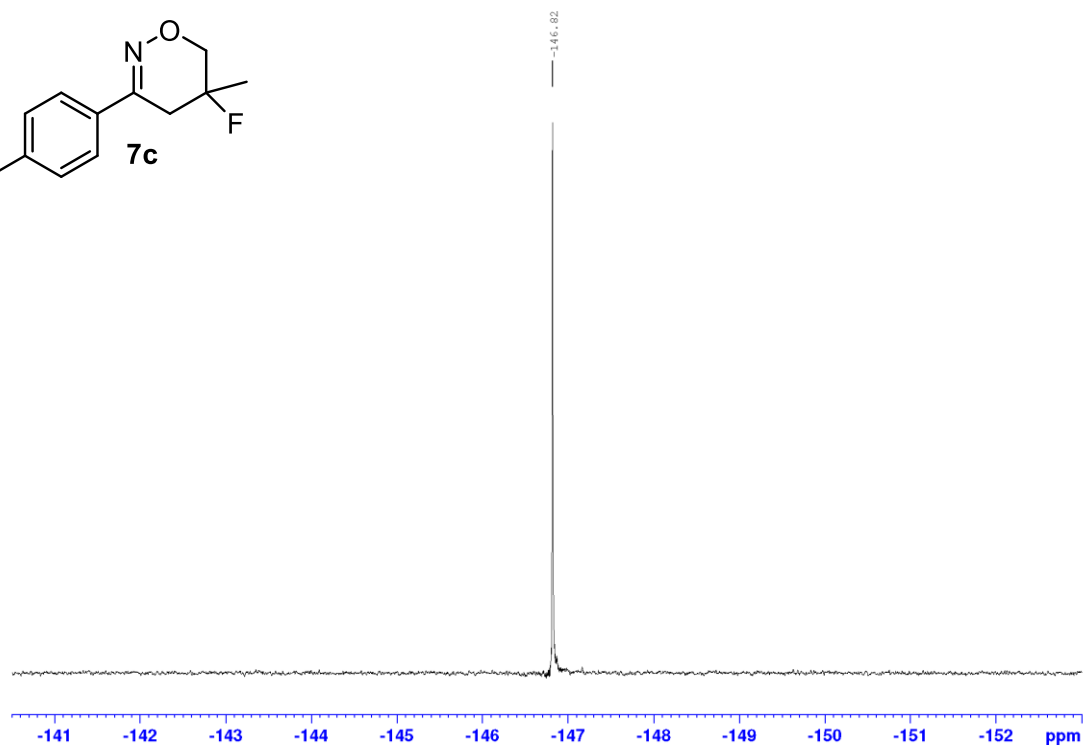

# <sup>1</sup>H NMR Spectrum

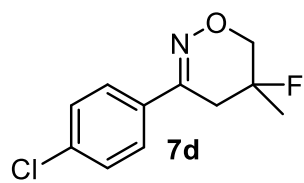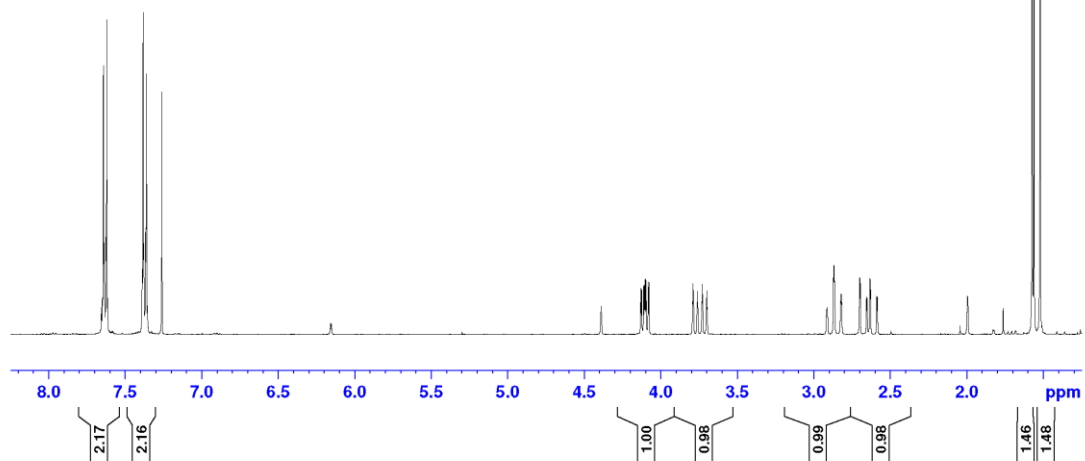

# <sup>13</sup>C NMR Spectrum

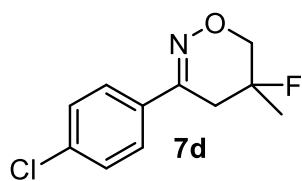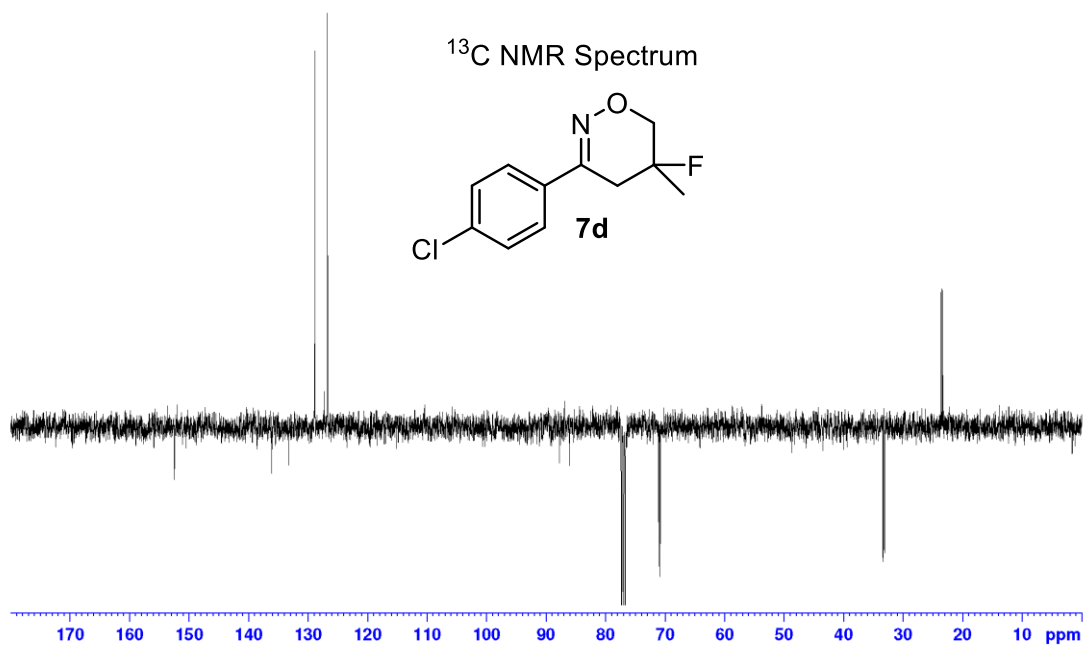



<sup>19</sup>F NMR Spectrum

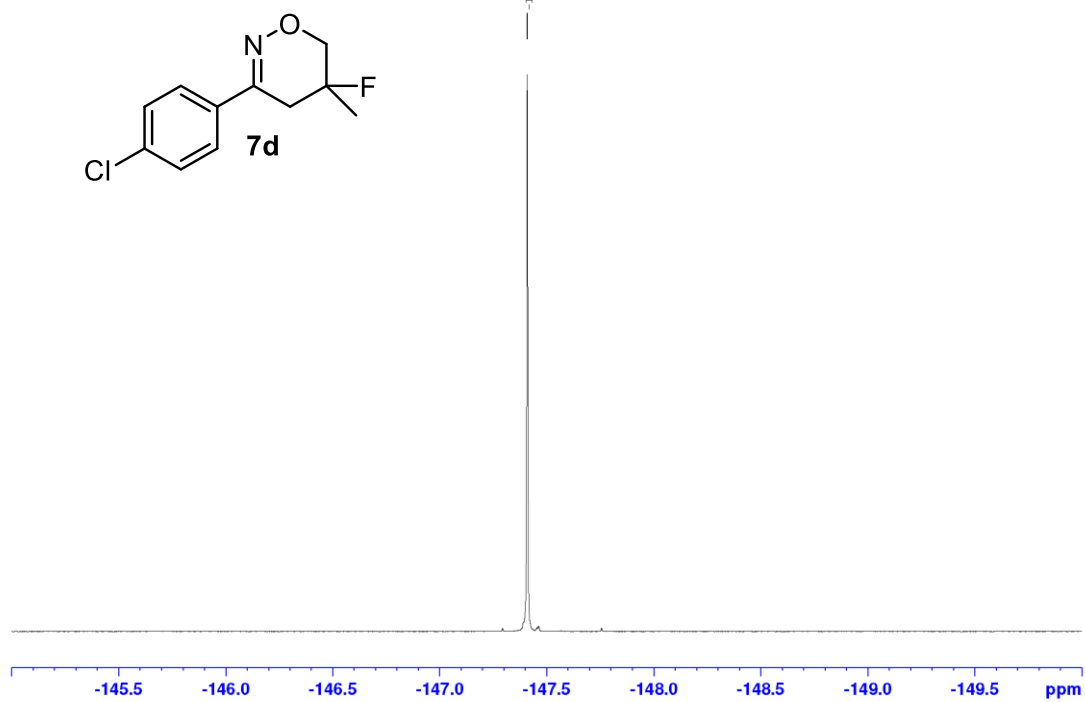

<sup>1</sup>H NMR Spectrum

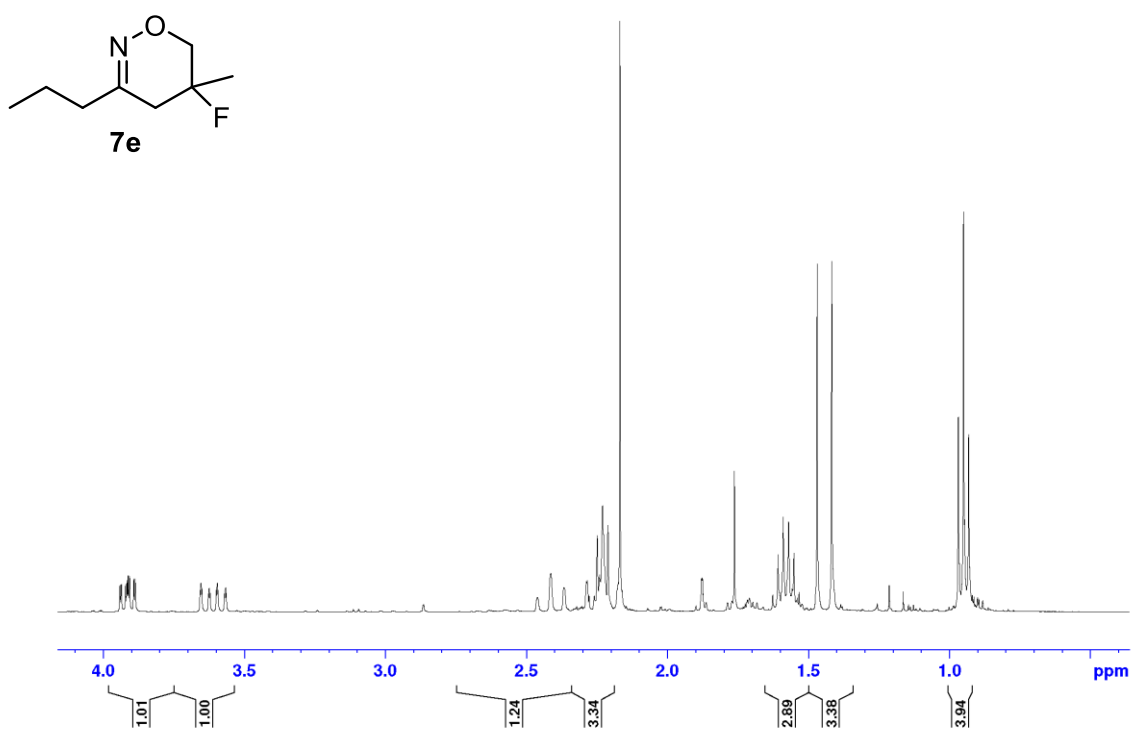

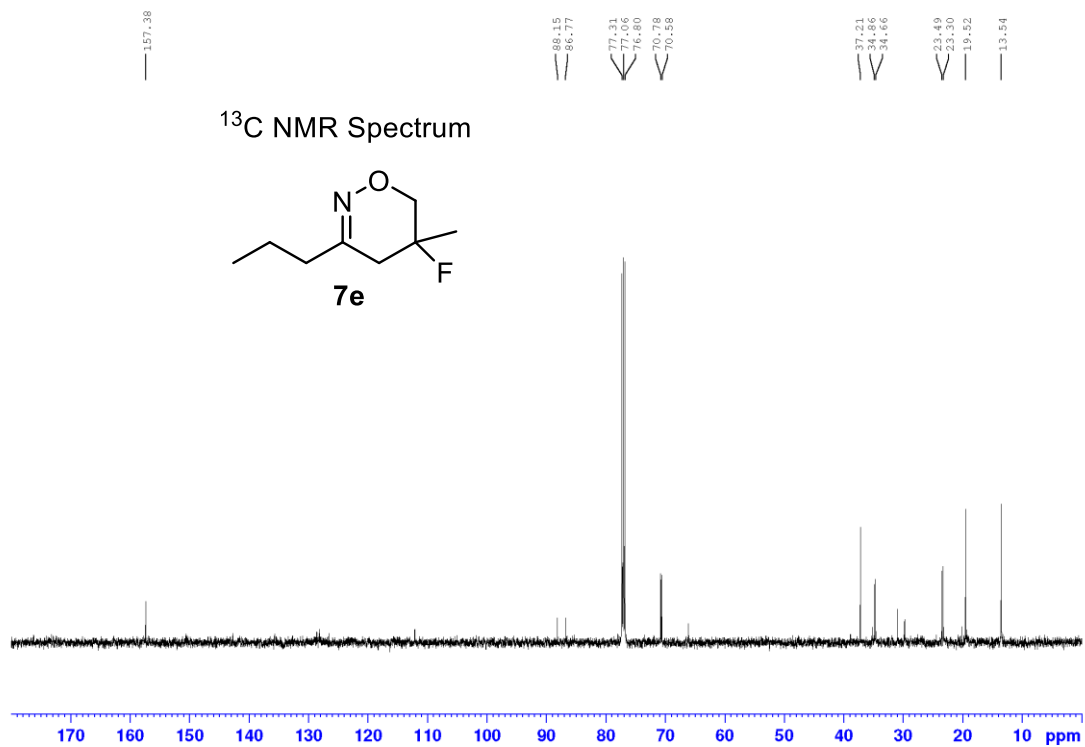

<sup>19</sup>F NMR Spectrum

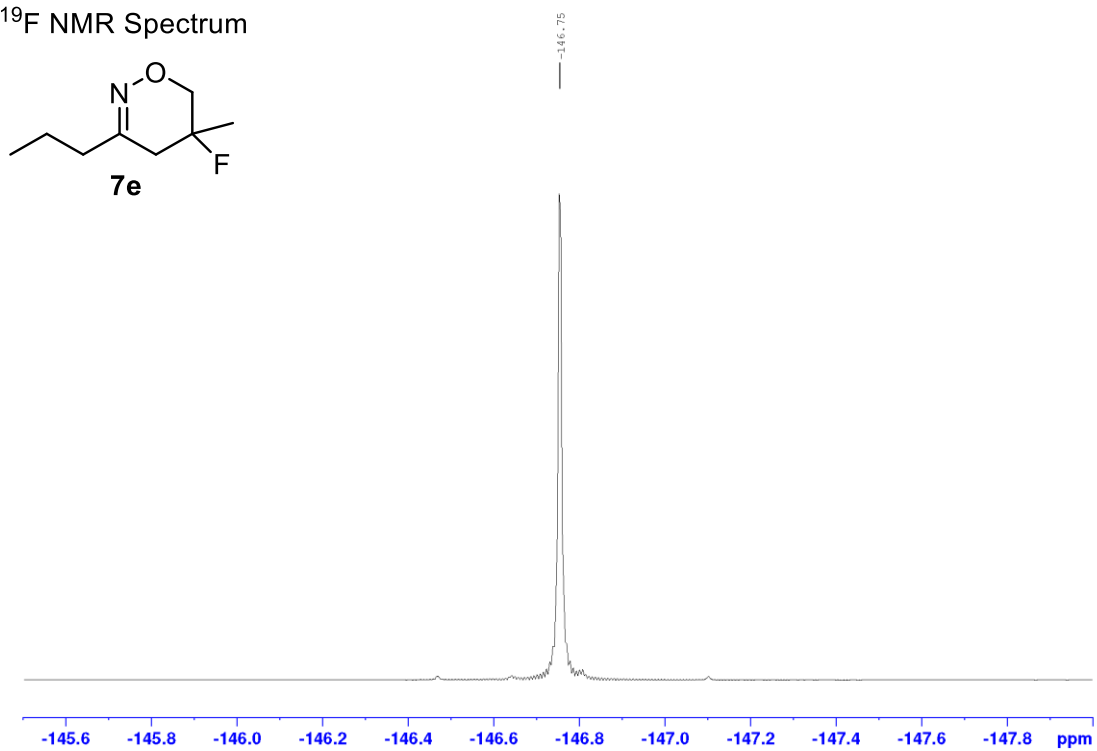



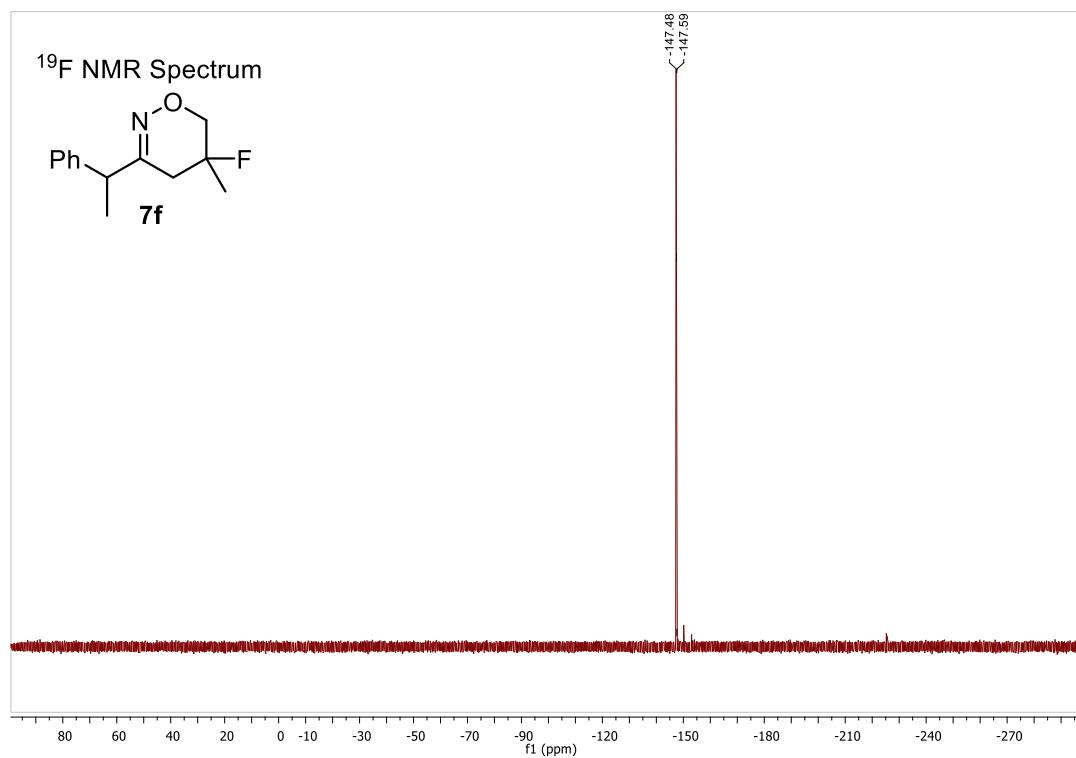

# <sup>1</sup>H NMR Spectrum

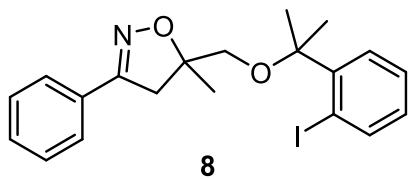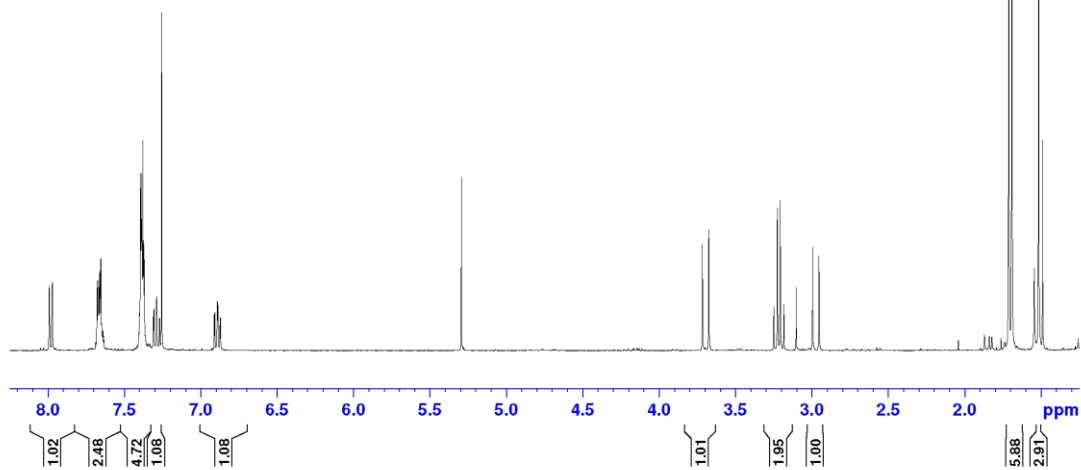

# <sup>13</sup>C NMR Spectrum

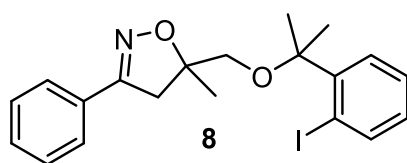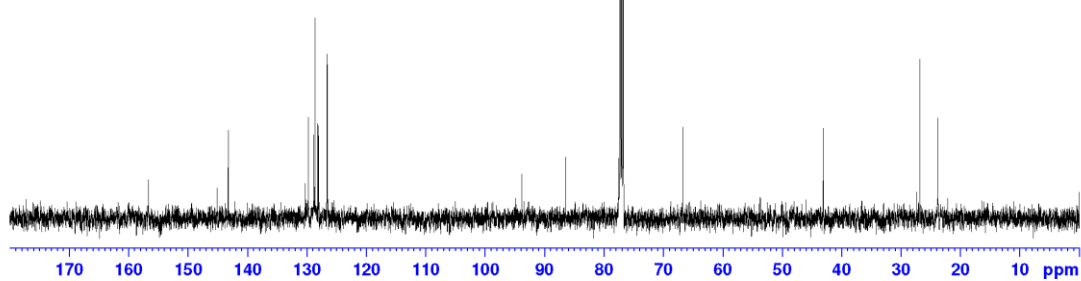

# <sup>1</sup>H NMR Spectrum

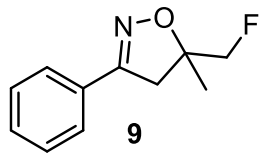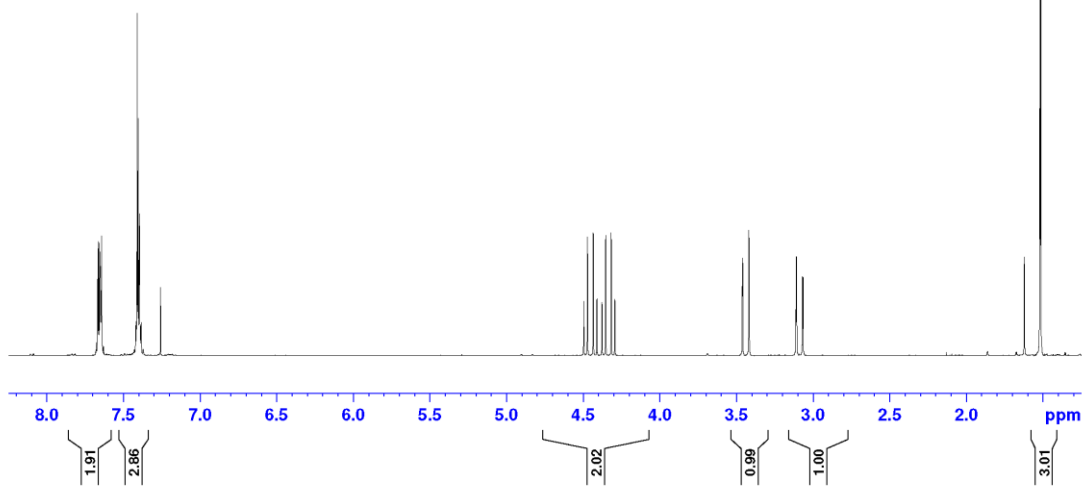

# <sup>13</sup>C NMR Spectrum

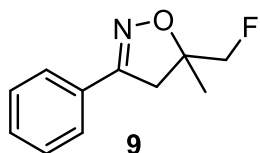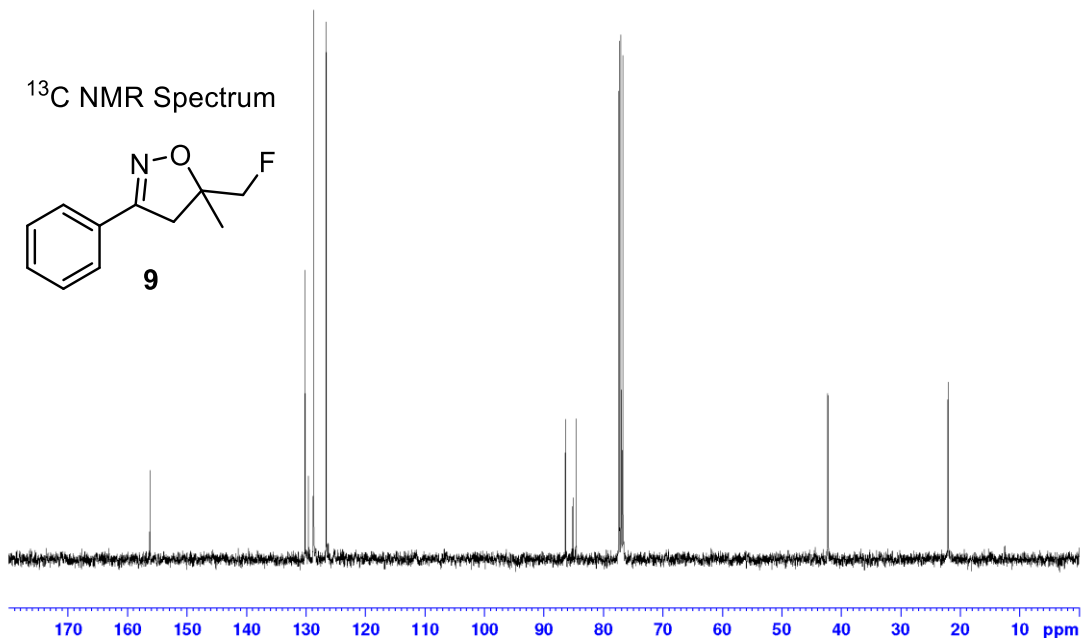

<sup>19</sup>F NMR Spectrum

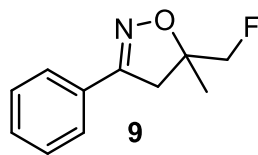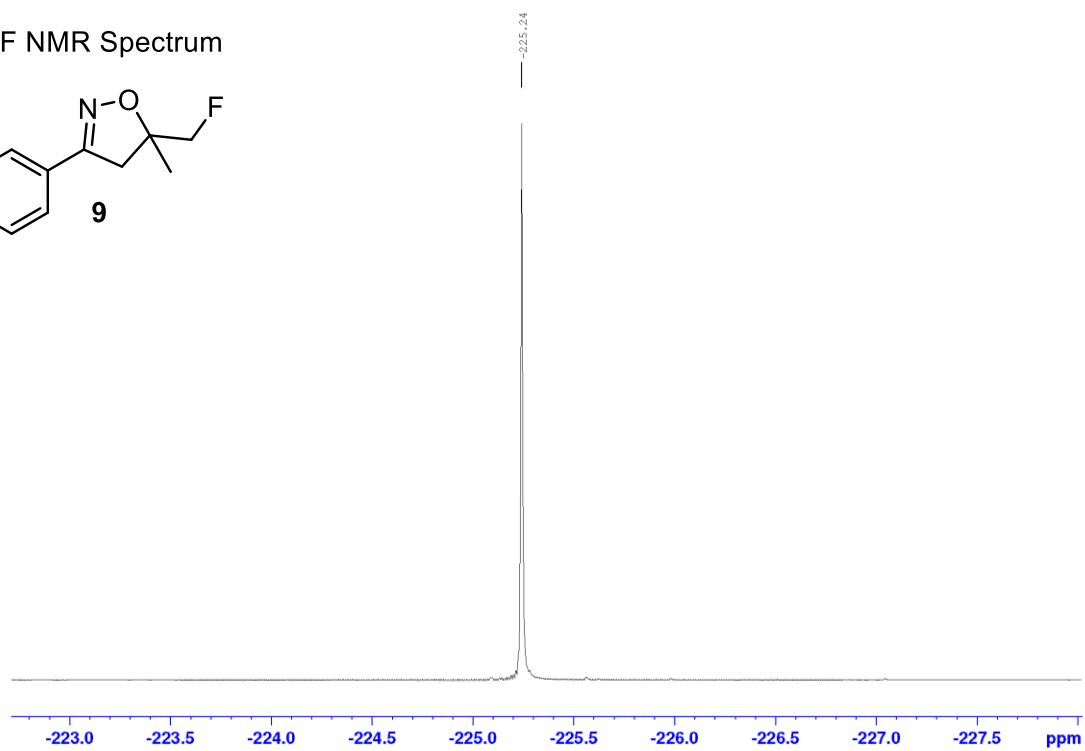

# <sup>1</sup>H NMR Spectrum

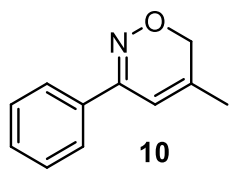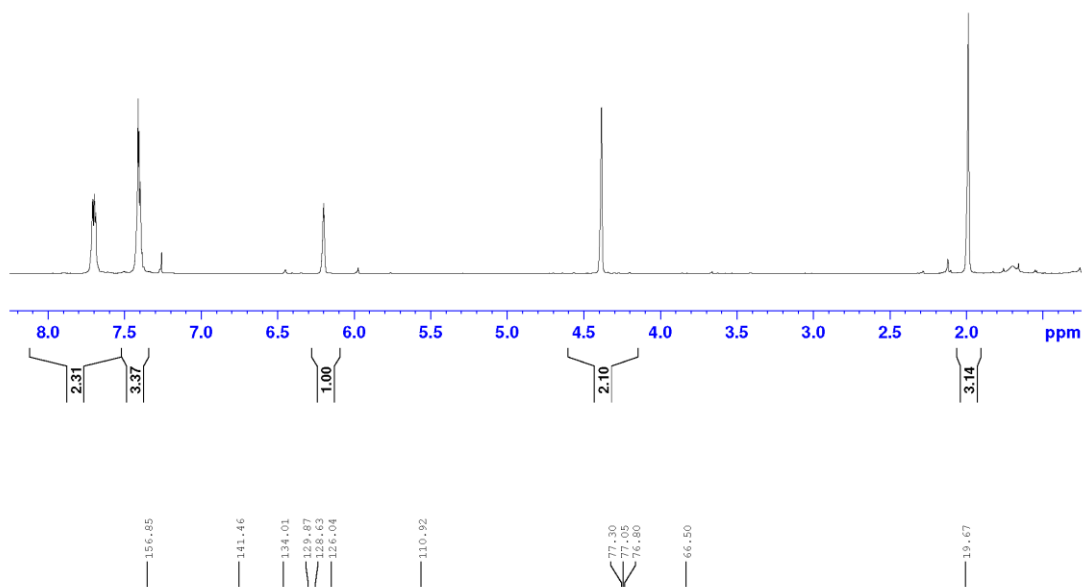

# <sup>13</sup>C NMR Spectrum

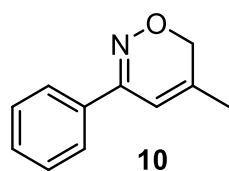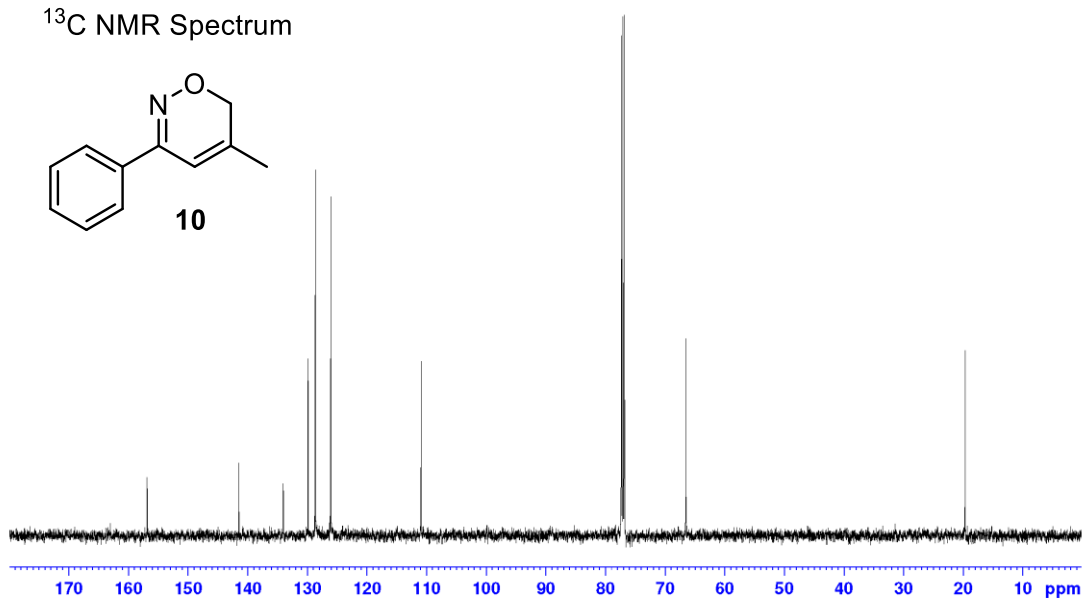



# <sup>1</sup>H NMR Spectrum

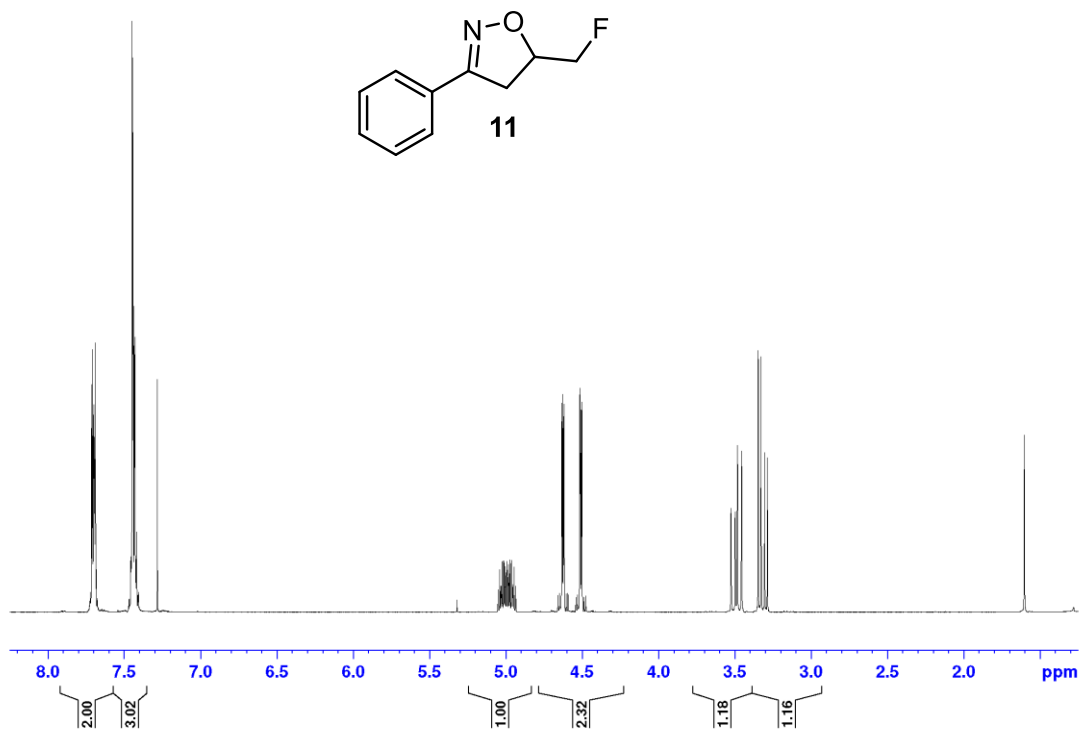

# <sup>13</sup>C NMR Spectrum

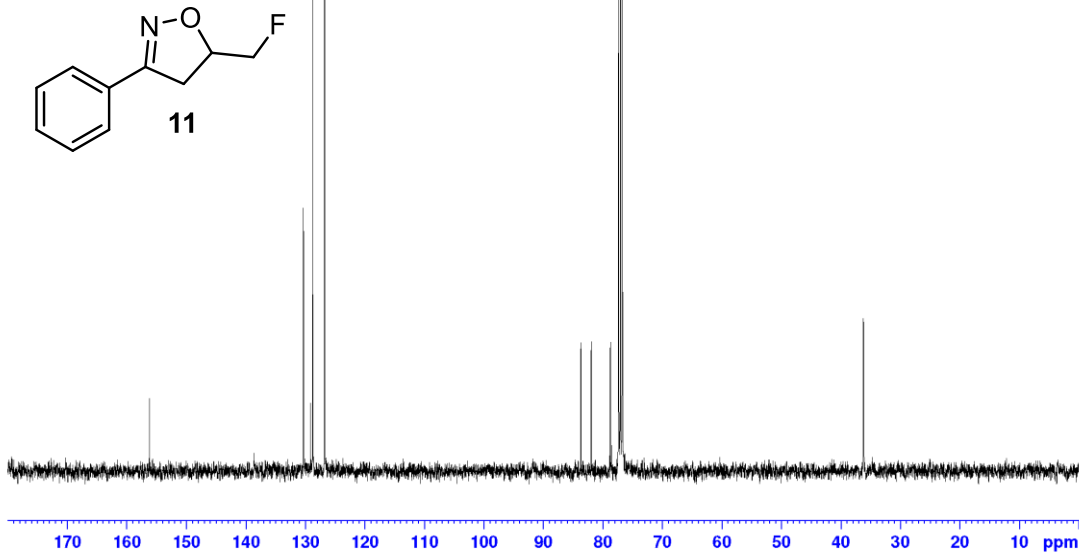

<sup>19</sup>F NMR Spectrum

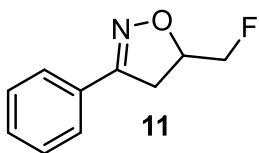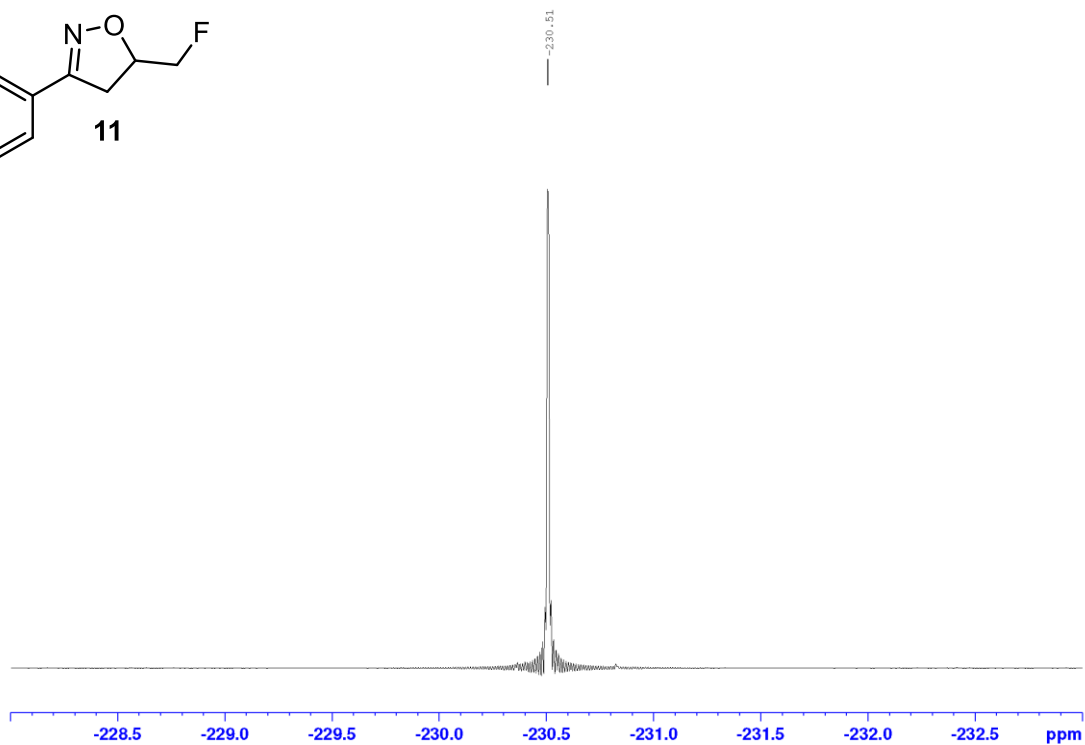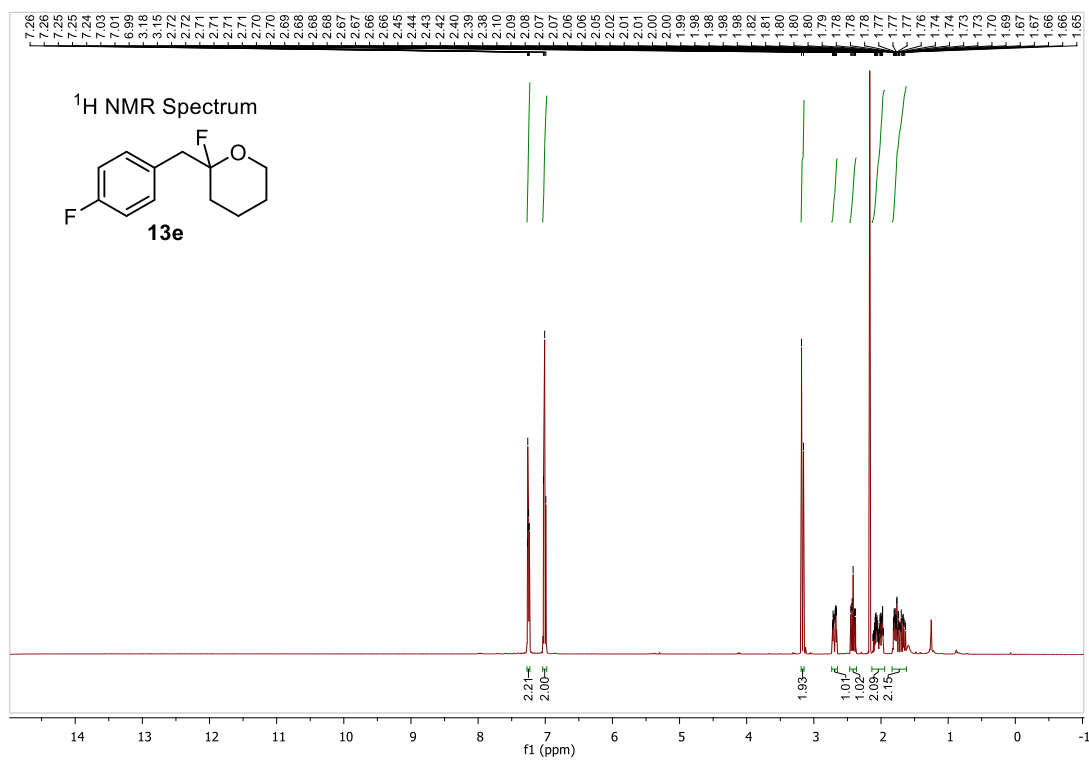

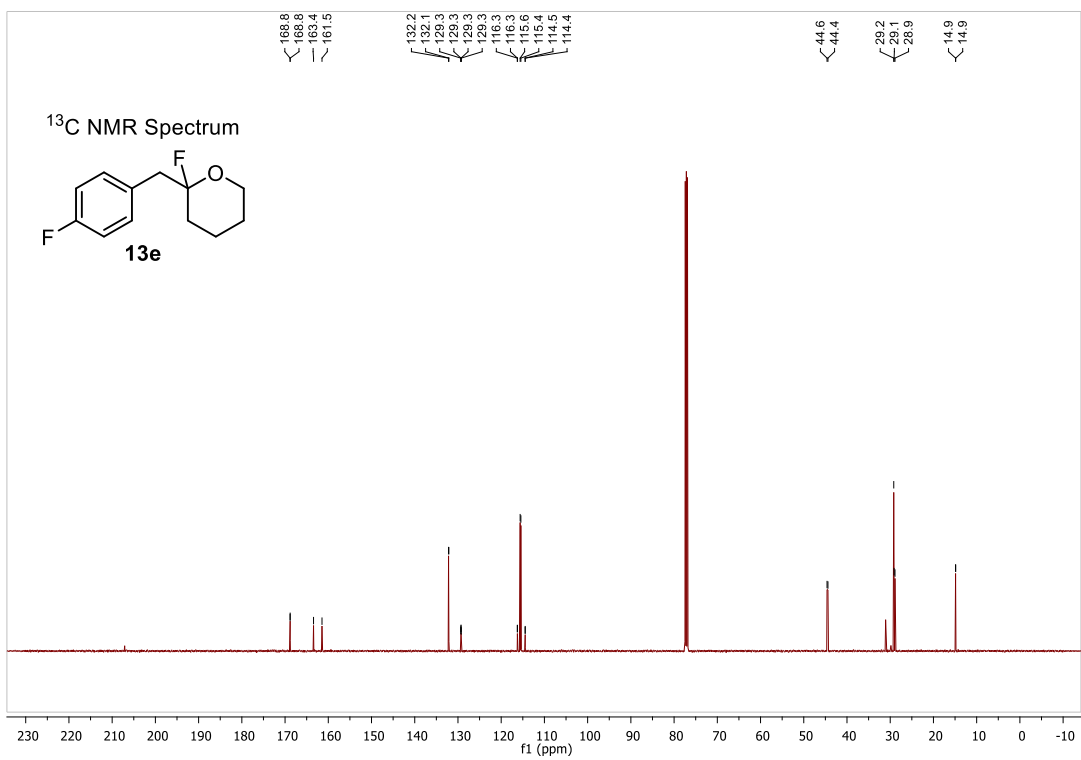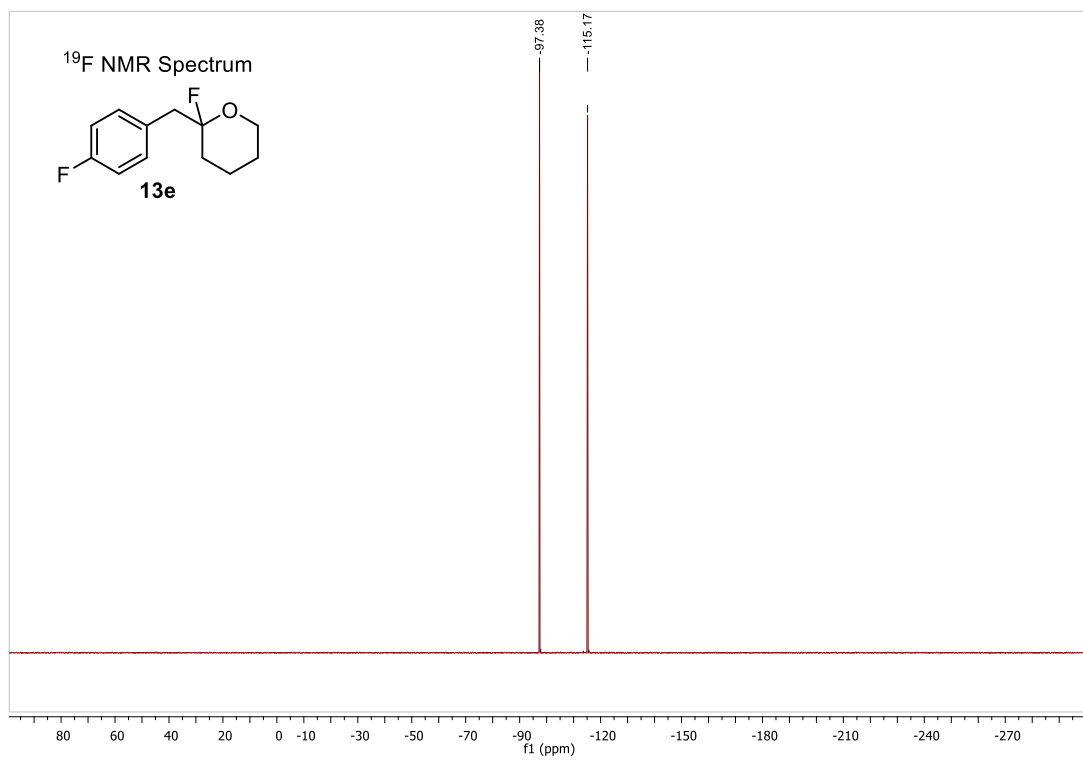

Supplement: d1cc02587b1.pdf [file d1cc02587b1.pdf]
